# Supplementary material for: Genome-wide association analysis uncovers rice blast resistance alleles of Ptr and Pia
Source: Commun Biol. 2024 May 20;7:607. doi: 10.1038/s42003-024-06244-z (PMC11106262; doi:10.1038/s42003-024-06244-z)
Supplement: Supplementary file 4 — Supplementary Data 2 [file 42003_2024_6244_MOESM4_ESM.xlsx]

## Sheet: Associated screened accessions
C923.49_Clean	Accession	323235882		JAPONICA NIPPONBARE POSITIONS	IRIS ID	ACCESSION	SUBPOPULATION	MISMATCH	6542459	6542506	6542518	6542521	6542540	6542629	6542633	6542650	6542726	6542732	6542818	6542840	6542891	6543009	6543026	6543028	6543082	6543083	6543137	6543211	6543280	6543325	6543400	6543442	6543494	6543570	6543602	6543661	6543742	6543758	6543838	6543911	6543932	6543941	6543950	6544091	6544097	6544171	6544249	6544305	C923.49_Clean
	LOC_OS11G11790 (RGA4)			JAPONICA NIPPONBARE ALLELES					C	C	A	G	T	G	G	A	T	C	C	A	C	C	A	T	G	C	C	G	T	G	C	G	G	G	C	A	C	G	G	C	G	A	C	C	G	G	G	C
CDS:	6546026			MSU7 EFFECTS (cds-Non-synonymous/cds-Synonymous/Cds/3'UTR/5'UTR/Exon/splice Acceptor/splice Donor/Gene-intron/Promoter)					N	N	N	N	N	N	N	N	N	N	N	N	N	N	N	N	N	N	N	N	N	N	N	N	N	N	N	N	N	N	N	N	N	N	N	N	N	N	N	N
	6541924	4102																												1401
																													dist from 3'	2701														dist from 3'	1929
1.02041																																						Good
		CHR11 : 6540075
0	IRIS_313-10002	A/A	1	BW 295-5::IRGC 63098-1	IRIS 313-10002	IRGC 125955	ind1B	11	C	C	A	G	T	G	G	A	G	C	T	G	C	C	A	T	G	C	C	G	T	A	C	G	G	C	C	G	C	C	G	T	T	A	G	C	A	G	G	C	0
0	IRIS_313-10046	A/A	1	CHAMA (DWARF)::IRGC 69487-1	IRIS 313-10046	IRGC 125958	ind1B	11	C	C	A	G	T	G	G	A	G	C	T	G	C	C	A	T	G	C	C	G	T	A	C	G	G	C	C	G	C	C	G	T	T	A	G	C	A	G	G	C	0
0	IRIS_313-10059	A/A	1	DACHEONGBYEO::IRGC 72533-1	IRIS 313-10059	IRGC 125717	temp	11	C	C	A	G	T	G	G	A	G	C	T	G	C	C	A	T	G	C	C	G	T	A	C	G	G	C	C	G	C	C	G	T	T	A	G	C	A	G	G	C	0
0	IRIS_313-10097	A/A	1	MAEKJO::IRGC 77666-1	IRIS 313-10097	IRGC 125830	temp	11	C	C	A	G	T	G	G	A	G	C	T	G	C	C	A	T	G	C	C	G	T	A	C	G	G	C	C	G	C	C	G	T	T	A	G	C	A	G	G	C	0
0	IRIS_313-10103	A/A	1	DALSUNG 41::IRGC 79385-1	IRIS 313-10103	IRGC 125721	indx	11	C	C	A	G	T	G	G	A	G	C	T	G	C	C	A	T	G	C	C	G	T	A	C	G	G	C	C	G	C	C	G	T	T	A	G	C	A	G	G	C	0
0	IRIS_313-10113	A/A	1	EX FOILAEIN (NAPUTO)::IRGC 81675-1	IRIS 313-10113	IRGC 125736	indx	11	C	C	A	G	T	G	G	A	G	C	T	G	C	C	A	T	G	C	C	G	T	A	C	G	G	C	C	G	C	C	G	T	T	A	G	C	A	G	G	C	0
0	IRIS_313-10119	A/A	1	GITANO::IRGC 82424-1	IRIS 313-10119	IRGC 125752	japx	11	C	C	A	G	T	G	G	A	G	C	T	G	C	C	A	T	G	C	C	G	T	A	C	G	G	C	C	G	C	C	G	T	T	A	G	C	A	G	G	C	0
0	IRIS_313-10151	A/A	1	RD 15::IRGC 47705-1	IRIS 313-10151	IRGC 126003	ind3	10.5	C	C	A	G	T	G	G	A	G	C	C/T	G	C	C	A	T	G	C	C	G	T	A	C	G	G	C	C	G	C	C	G	T	T	A	G	C	A	G	G	C	0
0	IRIS_313-10154	A/A	1	HE GU TSAO::IRGC 51302-1	IRIS 313-10154	IRGC 125760	ind1A	11	C	C	A	G	T	G	G	A	G	C	T	G	C	C	A	T	G	C	C	G	T	A	C	G	G	C	C	G	C	C	G	T	T	A	G	C	A	G	G	C	0
0	IRIS_313-10171	A/A	1	YA NONG ZAO 4::IRGC 63908-1	IRIS 313-10171	IRGC 125944	ind1A	12	C	C	A	G	T	G	G	A	G	C	T	G	C	C	A	T	G	C	C	G	T	A	C	G	G	C	C	G	C	C	G	T	T	A	G	C	A	A	G	C	0
0	IRIS_313-10211	A/A	1	BAI HE::IRGC 76438-1	IRIS 313-10211	IRGC 125669	ind1A	11	C	C	A	G	T	G	G	A	G	C	T	G	C	C	A	T	G	C	C	G	T	A	C	G	G	C	C	G	C	C	G	T	T	A	G	C	A	G	G	C	0
0	IRIS_313-10238	A/A	1	PSBRC 88::IRGC 99717-1	IRIS 313-10238	IRGC 125876	ind1B	11	C	C	A	G	T	G	G	A	G	C	T	G	C	C	A	T	G	C	C	G	T	A	C	G	G	C	C	G	C	C	G	T	T	A	G	C	A	G	G	C	0
0	IRIS_313-10247	A/A	1	AMISTAD 82::IRGC 116954-1	IRIS 313-10247	IRGC 125949	ind1B	11	C	C	A	G	T	G	G	A	G	C	T	G	C	C	A	T	G	C	C	G	T	A	C	G	G	C	C	G	C	C	G	T	T	A	G	C	A	G	G	C	0
0	IRIS_313-10279	A/A	1	JUMA 62::IRGC 117011-1	IRIS 313-10279	IRGC 126066	indx	11	C	C	A	G	T	G	G	A	G	C	T	G	C	C	A	T	G	C	C	G	T	A	C	G	G	C	C	G	C	C	G	T	T	A	G	C	A	G	G	C	0
0	IRIS_313-10293	A/A	1	ECIA 24-107-1::IRGC 116978-1	IRIS 313-10293	IRGC 125962	ind1B	11	C	C	A	G	T	G	G	A	G	C	T	G	C	C	A	T	G	C	C	G	T	A	C	G	G	C	C	G	C	C	G	T	T	A	G	C	A	G	G	C	0
0	IRIS_313-10298	A/A	1	3210::IRGC 116950-1	IRIS 313-10298	IRGC 127030	ind1B	11	C	C	A	G	T	G	G	A	G	C	T	G	C	C	A	T	G	C	C	G	T	A	C	G	G	C	C	G	C	C	G	T	T	A	G	C	A	G	G	C	0
0	IRIS_313-10301	A/A	1	IRGA 959-1-2-2F-4-1-4A-6-CA-6X::IRGC 117006-1	IRIS 313-10301	IRGC 126064	indx	11	C	C	A	G	T	G	G	A	G	C	T	G	C	C	A	T	G	C	C	G	T	A	C	G	G	C	C	G	C	C	G	T	T	A	G	C	A	G	G	C	0
0	IRIS_313-10314	A/A	1	INIAP 10::IRGC 117000-1	IRIS 313-10314	IRGC 125969	indx	11	C	C	A	G	T	G	G	A	G	C	T	G	C	C	A	T	G	C	C	G	T	A	C	G	G	C	C	G	C	C	G	T	T	A	G	C	A	G	G	C	0
0	IRIS_313-10352	A/A	1	CT 9737-6-1-1-2-2P-M::IRGC 117330-1	IRIS 313-10352	IRGC 120922	indx	11	C	C	A	G	T	G	G	A	G	C	T	G	C	C	A	T	G	C	C	G	T	A	C	G	G	C	C	G	C	C	G	T	T	A	G	C	A	G	G	C	0
0	IRIS_313-10400	A/A	1	IRGA 370-38-1-1F-C4-2::IRGC 117342-1	IRIS 313-10400	IRGC 125988	ind1B	11	C	C	A	G	T	G	G	A	G	C	T	G	C	C	A	T	G	C	C	G	T	A	C	G	G	C	C	G	C	C	G	T	T	A	G	C	A	G	G	C	0
0	IRIS_313-10430	A/A	1	GINMASARI::IRGC 242-1	IRIS 313-10430	IRGC 128299	temp	11	C	C	A	G	T	G	G	A	G	C	T	G	C	C	A	T	G	C	C	G	T	A	C	G	G	C	C	G	C	C	G	T	T	A	G	C	A	G	G	C	0
0	IRIS_313-10453	A/A	1	LU TAO 2::IRGC 1175-1	IRIS 313-10453	IRGC 128371	japx	11	C	C	A	G	T	G	G	A	G	C	T	G	C	C	A	T	G	C	C	G	T	A	C	G	G	C	C	G	C	C	G	T	T	A	G	C	A	G	G	C	0
0	IRIS_313-10477	A/A	1	RUSTY LATE::IRGC 3506-1	IRIS 313-10477	IRGC 128454	indx	11	C	C	A	G	T	G	G	A	G	C	T	G	C	C	A	T	G	C	C	G	T	A	C	G	G	C	C	G	C	C	G	T	T	A	G	C	A	G	G	C	0
0	IRIS_313-10497	A/A	1	CE IN TSAN::IRGC 4362-1	IRIS 313-10497	IRGC 127249	ind1A	11	C	C	A	G	T	G	G	A	G	C	T	G	C	C	A	T	G	C	C	G	T	A	C	G	G	C	C	G	C	C	G	T	T	A	G	C	A	G	G	C	0
0	IRIS_313-10511	A/A	1	MACAN SAPAC::IRGC 5212-2	IRIS 313-10511	IRGC 128101	ind3	11	C	C	A	G	T	G	G	A	G	C	T	G	C	C	A	T	G	C	C	G	T	A	C	G	G	C	C	G	C	C	G	T	T	A	G	C	A	G	G	C	0
0	IRIS_313-10515	A/A	1	TAICHUNG WOO GEN 2::IRGC 5525-1	IRIS 313-10515	IRGC 127836	ind1A	11	C	C	A	G	T	G	G	A	G	C	T	G	C	C	A	T	G	C	C	G	T	A	C	G	G	C	C	G	C	C	G	T	T	A	G	C	A	G	G	C	0
0	IRIS_313-10534	A/A	1	D 204-1::IRGC 6445-1	IRIS 313-10534	IRGC 127290	aus	11	C	C	A	G	T	G	G	A	G	C	T	G	C	C	A	T	G	C	C	G	T	A	C	G	G	C	C	G	C	C	G	T	T	A	G	C	A	G	G	C	0
0	IRIS_313-10561	A/A	1	NAN TEO 14::IRGC 7304-1	IRIS 313-10561	IRGC 127645	ind1A	12	C	C	A	G	T	G	G	A	G	C	T	G	C	C	A	T	G	C	C	G	T	A	C	G	G	C	C	G	C	C	G	T	T	A	G	C	A	A	G	C	0
0	IRIS_313-10603	A/A	1	UCP 122::IRGC 8794-1	IRIS 313-10603	IRGC 127871	aus	11	C	C	A	G	T	G	G	A	G	C	T	G	C	C	A	T	G	C	C	G	T	A	C	G	G	C	C	G	C	C	G	T	T	A	G	C	A	G	G	C	0
0	IRIS_313-10628	A/A	1	O. SATIVA::IRGC 10164-2	IRIS 313-10628	IRGC 132361	ind2	8	T	C	A	G	T	A	G	A	G	C	C	G	C	C	A	T	G	C	C	A	T	A	C	G	G	G	C	G	C	G	A	C	G	A	C	C	G	G	G	C	0
0	IRIS_313-10648	A/A	1	PREAH SIHANOUK::IRGC 11328-2	IRIS 313-10648	IRGC 132364	ind3	11	C	C	A	G	T	G	G	A	G	C	T	G	C	C	A	T	G	C	C	G	T	A	C	G	G	C	C	G	C	C	G	T	T	A	G	C	A	G	G	C	0
0	IRIS_313-10656	A/A	1	NOK KOD::IRGC 11784-1	IRIS 313-10656	IRGC 128407	subtrop	11	C	C	A	G	T	G	G	A	G	C	T	G	C	C	A	T	G	C	C	G	T	A	C	G	G	C	C	G	C	C	G	T	T	A	G	C	A	G	G	C	0
0	IRIS_313-10664	A/A	1	ARC 6052::IRGC 12196-1	IRIS 313-10664	IRGC 127163	ind2	11	C	C	A	G	T	G	G	A	G	C	T	G	C	C	A	T	G	C	C	G	T	A	C	G	G	C	C	G	C	C	G	T	T	A	G	C	A	G	G	C	0
0	IRIS_313-10703	A/A	1	PADI ADONG DUMARAT::IRGC 14356-1	IRIS 313-10703	IRGC 128418	trop	8	T	C	A	G	T	A	G	A	G	C	C	G	C	C	A	T	G	C	C	A	T	A	C	G	G	G	C	G	C	G	A	C	G	A	C	C	G	G	G	C	0
0	IRIS_313-10710	A/A	1	PINDE GOGO WIERIE::IRGC 14795-2	IRIS 313-10710	IRGC 128135	trop	11	C	C	A	G	T	G	G	A	G	C	T	G	C	C	A	T	G	C	C	G	T	A	C	G	G	C	C	G	C	C	G	T	T	A	G	C	A	G	G	C	0
0	IRIS_313-10722	A/A	1	GODAWEL::IRGC 15750-1	IRIS 313-10722	IRGC 128301	trop	11	C	C	A	G	T	G	G	A	G	C	T	G	C	C	A	T	G	C	C	G	T	A	C	G	G	C	C	G	C	C	G	T	T	A	G	C	A	G	G	C	0
0	IRIS_313-10725	A/A	1	ERNEST::IRGC 15884-2	IRIS 313-10725	IRGC 128518	indx	11	C	C	A	G	T	G	G	A	G	C	T	G	C	C	A	T	G	C	C	G	T	A	C	G	G	C	C	G	C	C	G	T	T	A	G	C	A	G	G	C	0
0	IRIS_313-10750	A/A	1	TRANG LUA::IRGC 16781-1	IRIS 313-10750	IRGC 135804	ind3	11	C	C	A	G	T	G	G	A	G	C	T	G	C	C	A	T	G	C	C	G	T	A	C	G	G	C	C	G	C	C	G	T	T	A	G	C	A	G	G	C	0
0	IRIS_313-10753	A/A	1	ZACATEPEC::IRGC 16901-2	IRIS 313-10753	IRGC 128205	ind1B	11	C	C	A	G	T	G	G	A	G	C	T	G	C	C	A	T	G	C	C	G	T	A	C	G	G	C	C	G	C	C	G	T	T	A	G	C	A	G	G	C	0
0	IRIS_313-10754	A/A	1	KH 998::IRGC 16948-2	IRIS 313-10754	IRGC 128081	indx	5	C	C	A	T	T	G	G	A	G	C	C	G	C	C	A	T	G	C	C	G	T	A	C	G	G	G	C	G	C	G	G	C	G	A	C	C	G	G	G	C	0
0	IRIS_313-10768	A/A	1	GADABUNG (GUNDIL)::IRGC 17569-2	IRIS 313-10768	IRGC 132423	ind3	11	C	C	A	G	T	G	G	A	G	C	T	G	C	C	A	T	G	C	C	G	T	A	C	G	G	C	C	G	C	C	G	T	T	A	G	C	A	G	G	C	0
0	IRIS_313-10806	A/A	1	RADEN DJAWA (GUNDIL)::IRGC 18558-1	IRIS 313-10806	IRGC 135789	ind3	11	C	C	A	G	T	G	G	A	G	C	T	G	C	C	A	T	G	C	C	G	T	A	C	G	G	C	C	G	C	C	G	T	T	A	G	C	A	G	G	C	0
0	IRIS_313-10844	A/A	1	INDO NO 7505::IRGC 20162-2	IRIS 313-10844	IRGC 128058	ind3	10.5	C	C	A	G	T	G	G	A	G	C	T	G	C	C	A	T	G	C	C	G	T	A	C	G	G	C	C	G	C	C	G	T	T	A	C/G	C	A	G	G	C	0
0	IRIS_313-10849	A/A	1	ARC 7001::IRGC 20436-1	IRIS 313-10849	IRGC 127166	aus	11	C	C	A	G	T	G	G	A	G	C	T	G	C	C	A	T	G	C	C	G	T	A	C	G	G	C	C	G	C	C	G	T	T	A	G	C	A	G	G	C	0
0	IRIS_313-10855	A/A	1	ARC 10159::IRGC 20754-2	IRIS 313-10855	IRGC 132316	ind2	8	T	C	A	G	T	A	G	A	G	C	C	G	C	C	A	T	G	C	C	A	T	A	C	G	G	G	C	G	C	G	A	C	G	A	C	C	G	G	G	C	0
0	IRIS_313-10872	A/A	1	ARC 11802::IRGC 21662-2	IRIS 313-10872	IRGC 132421	japx	11	C	C	A	G	T	G	G	A	G	C	T	G	C	C	A	T	G	C	C	G	T	A	C	G	G	C	C	G	C	C	G	T	T	A	G	C	A	G	G	C	0
0	IRIS_313-10874	A/A	1	ARC 11946::IRGC 21768-2	IRIS 313-10874	IRGC 132318	subtrop	11	C	C	A	G	T	G	G	A	G	C	T	G	C	C	A	T	G	C	C	G	T	A	C	G	G	C	C	G	C	C	G	T	T	A	G	C	A	G	G	C	0
0	IRIS_313-10880	A/A	1	ARC 12180::IRGC 21965-2	IRIS 313-10880	IRGC 127940	ind2	11	C	C	A	G	T	G	G	A	G	C	T	G	C	C	A	T	G	C	C	G	T	A	C	G	G	C	C	G	C	C	G	T	T	A	G	C	A	G	G	C	0
0	IRIS_313-10884	A/A	1	ARC 12493::IRGC 22098-1	IRIS 313-10884	IRGC 128225	subtrop	11	C	C	A	G	T	G	G	A	G	C	T	G	C	C	A	T	G	C	C	G	T	A	C	G	G	C	C	G	C	C	G	T	T	A	G	C	A	G	G	C	0
0	IRIS_313-10929	A/A	1	KOLONGI BAO::IRGC 24135-2	IRIS 313-10929	IRGC 128090	ind2	11	C	C	A	G	T	G	G	A	G	C	T	G	C	C	A	T	G	C	C	G	T	A	C	G	G	C	C	G	C	C	G	T	T	A	G	C	A	G	G	C	0
0	IRIS_313-10951	A/A	1	JENDA ABANG::IRGC 25413-2	IRIS 313-10951	IRGC 128062	ind3	11	C	C	A	G	T	G	G	A	G	C	T	G	C	C	A	T	G	C	C	G	T	A	C	G	G	C	C	G	C	C	G	T	T	A	G	C	A	G	G	C	0
0	IRIS_313-10966	A/A	1	HURANG ARISO LUTA::IRGC 26055-1	IRIS 313-10966	IRGC 127424	indx	11	C	C	A		T	G	G	A	G	C	T	G	C	C	A	T	G	C	C	G	T	A	C	G	G	C	C	G	C	C	G	T	T	A	G	C	A	G	G	C	0
0	IRIS_313-10968	A/A	1	IH PEN SHIM MING::IRGC 26067-1	IRIS 313-10968	IRGC 127428	ind1A	11	C	C	A	G	T	G	G	A	G	C	T	G	C	C	A	T	G	C	C	G	T	A	C	G	G	C	C	G	C	C	G	T	T	A	G	C	A	G	G	C	0
0	IRIS_313-10985	A/A	1	GOBOL SAIL (BALAM)::IRGC 26624-2	IRIS 313-10985	IRGC 132424	ind2	11	C	C	A	G	T	G	G	A	G	C	T	G	C	C	A	T	G	C	C	G	T	A	C	G	G	C	C	G	C	C	G	T	T	A	G	C	A	G	G	C	0
0	IRIS_313-10996	A/A	1	BAKASI::IRGC 27074-1	IRIS 313-10996	IRGC 127204	indx	11	C	C	A	G	T	G	G	A	G	C	T	G	C	C	A	T	G	C	C	G	T	A	C	G	G	C	C	G	C	C	G	T	T	A	G	C	A	G	G	C	0
0	IRIS_313-10997	A/A	1	CEMPO MANGGAR::IRGC 27107-1	IRIS 313-10997	IRGC 127250	ind3	11	C	C	A	G	T	G	G	A	G	C	T	G	C	C	A	T	G	C	C	G	T	A	C	G	G	C	C	G	C	C	G	T	T	A	G	C	A	G	G	C	0
0	IRIS_313-11035	A/A	1	ZIRA SHAHI::IRGC 28327-1	IRIS 313-11035	IRGC 128513	admix	11	C	C	A	G	T	G	G	A	G	C	T	G	C	C	A	T	G	C	C	G	T	A	C	G	G	C	C	G	C	C	G	T	T	A	G	C	A	G	G	C	0
0	IRIS_313-11038	A/A	1	AI NAN TSAO 39::IRGC 28461-2	IRIS 313-11038	IRGC 127924	ind1A	12	C	C	A	G	T	G	G	A	G	C	T	G	C	C	A	T	G	C	C	G	T	A	C	G	G	C	C	G	C	C	G	T	T	A	G	C	A	A	G	C	0
0	IRIS_313-11050	A/A	1	AUS 233::IRGC 29036-1	IRIS 313-11050	IRGC 127180	aus	11	C	C	A	G	T	G	G	A	G	C	T	G	C	C	A	T	G	C	C	G	T	A	C	G	G	C	C	G	C	C	G	T	T	A	G	C	A	G	G	C	0
0	IRIS_313-11094	A/A	1	MAK BOUAP::IRGC 30106-3	IRIS 313-11094	IRGC 132274	subtrop	11	C	C	A	G	T	G	G	A	G	C	T	G	C	C	A	T	G	C	C	G	T	A	C	G	G	C	C	G	C	C	G	T	T	A	G	C	A	G	G	C	0
0	IRIS_313-11096	A/A	1	CADUNG SO BLOC 1::IRGC 30231-1	IRIS 313-11096	IRGC 135743	ind3	11	C	C	A	G	T	G	G	A	G	C	T	G	C	C	A	T	G	C	C	G	T	A	C	G	G	C	C	G	C	C	G	T	T	A	G	C	A	G	G	C	0
0	IRIS_313-11114	A/A	1	BIRUI SAIL::IRGC 31745-2	IRIS 313-11114	IRGC 132305	ind2	11	C	C	A	G	T	G	G	A	G	C	T	G	C	C	A	T	G	C	C	G	T	A	C	G	G	C	C	G	C	C	G	T	T	A	G	C	A	G	G	C	0
0	IRIS_313-11123	A/A	1	BAZAIL 975::IRGC 32816-2	IRIS 313-11123	IRGC 127990	aus	13	C	C	G	G	C	A	G	A	G	G	C	G	C	C	G	T	A	C	C	G	G	A	C	G	G	C	C	G	C	G	G	C	G	A	C	C	G	G	G	G	0
0	IRIS_313-11149	A/A	1	YODAYA::IRGC 33901-2	IRIS 313-11149	IRGC 128204	ind3	16		C	G	G	T	G	G	G	G	C	C	G	C	G	A	G	A	C	C	G	T	A	T	G	G	C	C	G	C	C	G	T	T	C	G	C	G	G	G	C	0
0	IRIS_313-11156	A/A	1	KHUDWANI ACC 202::IRGC 34154-1	IRIS 313-11156	IRGC 127522	japx	8	T	C	A	G	T	A	G	A	G	C	C	G	C	C	A	T	G	C	C	A	T	A	C	G	G	G	C	G	C	G	A	C	G	A	C	C	G	G	G	C	0
0	IRIS_313-11200	A/A	1	BR 52-87-1::IRGC 36849-2	IRIS 313-11200	IRGC 128002	ind1B	11	C	C	A	G	T	G	G	A	G	C	T	G	C	C	A	T	G	C	C	G	T	A	C	G	G	C	C	G	C	C	G	T	T	A	G	C	A	G	G	C	0
0	IRIS_313-11214	A/A	1	SHITTA AMAN::IRGC 37596-1	IRIS 313-11214	IRGC 127799	aus	11	C	C	A	G	T	G	G	A	G	C	T	G	C	C	A	T	G	C	C	G	T	A	C	G	G	C	C	G	C	C	G	T	T	A	G	C	A	G	G	C	0
0	IRIS_313-11236	A/A	1	LIONG ORN::IRGC 38875-2	IRIS 313-11236	IRGC 128523	ind3	11	C	C	A	G	T	G	G	A	G	C	T	G	C	C	A	T	G	C	C	G	T	A	C	G	G	C	C	G	C	C	G	T	T	A	G	C	A	G	G	C	0
0	IRIS_313-11246	A/A	1	7516-14::IRGC 40090-3	IRIS 313-11246	IRGC 132271	temp	11	C	C	A	G	T	G	G	A	G	C	T	G	C	C	A	T	G	C	C	G	T	A	C	G	G	C	C	G	C	C	G	T	T	A	G	C	A	G	G	C	0
0	IRIS_313-11248	A/A	1	NIAW KHAMIN::IRGC 40222-1	IRIS 313-11248	IRGC 127676	trop	8	T	C	A	G	T	A	G	A	G	C	C	G	C	C	A	T	G	C	C	A	T	A	C	G	G	G	C	G	C	G	A	C	G	A	C	C	G	G	G	C	0
0	IRIS_313-11250	A/A	1	IR 9560-2-6-3::IRGC 40451-1	IRIS 313-11250	IRGC 127441	ind1B	11	C	C	A	G	T	G	G	A	G	C	T	G	C	C	A	T	G	C	C	G	T	A	C		G	C	C	G	C	C	G	T	T	A	G	C	A	G	G	C	0
0	IRIS_313-11251	A/A	1	IR 4500-5-1-1::IRGC 40552-2	IRIS 313-11251	IRGC 132340	ind1B	11	C	C	A	G	T	G	G	A	G	C	T	G	C	C	A	T	G	C	C	G	T	A	C	G	G	C	C	G	C	C	G	T	T	A	G	C	A	G	G	C	0
0	IRIS_313-11267	A/A	1	ARC 14358::IRGC 41523-2	IRIS 313-11267	IRGC 127956	ind2	11	C	C	A	G	T	G	G	A	G	C	T	G	C	C	A	T	G	C	C	G	T	A	C	G	G	C	C	G	C	C	G	T	T	A	G	C	A	G	G	C	0
0	IRIS_313-11281	A/A	1	ARC 15505::IRGC 42066-1	IRIS 313-11281	IRGC 131967	ind1A	11	C	C	A	G	T	G	G	A	G	C	T	G	C	C	A	T	G	C	C	G	T	A	C	G	G	C	C	G	C	C	G	T	T	A	G	C	A	G	G	C	0
0	IRIS_313-11282	A/A	1	ARC 15589::IRGC 42096-2	IRIS 313-11282	IRGC 132243	ind2	11	C	C	A	G	T	G	G	A	G	C	T	G	C	C	A	T	G	C	C	G	T	A	C	G	G	C	C	G	C	C	G	T	T	A	G	C	A	G	G	C	0
0	IRIS_313-11292	A/A	1	ARC 10120::IRGC 42557-2	IRIS 313-11292	IRGC 127929	indx	11	C	C	A	G	T	G	G	A	G	C	T	G	C	C	A	T	G	C	C	G	T	A	C	G	G	C	C	G	C	C	G	T	T	A	G	C	A	G	G	C	0
0	IRIS_313-11324	A/A	1	KALABOKRI::IRGC 43872-1	IRIS 313-11324	IRGC 127477	aus	11	C	C	A	G	T	G	G	A	G	C	T	G	C	C	A	T	G	C	C	G	T	A	C	G	G	C	C	G	C	C	G	T	T	A	G	C	A	G	G	C	0
0	IRIS_313-11344	A/A	1	SAMON::IRGC 44735-2	IRIS 313-11344	IRGC 128157	ind3	11	C	C	A	G	T	G	G	A	G	C	T	G	C	C	A	T	G	C	C	G	T	A	C	G	G	C	C	G	C	C	G	T	T	A	G	C	A	G	G	C	0
0	IRIS_313-11346	A/A	1	WAGWAG PUTI::IRGC 44804-2	IRIS 313-11346	IRGC 132371	ind1B	11	C	C	A	G	T	G	G	A	G	C	T	G	C	C	A	T	G	C	C	G	T	A	C	G	G	C	C	G	C	C	G	T	T	A	G	C	A	G	G	C	0
0	IRIS_313-11351	A/A	1	BANCHI::IRGC 45055-2	IRIS 313-11351	IRGC 127986	ind2	8	T	C	A	G	T	A	G	A	G	C	C	G	C	C	A	T	G	C	C	A	T	A	C	G	G	G	C	G	C	G	A	C	G	A	C	C	G	G	G	C	0
0	IRIS_313-11352	A/A	1	BUCHI::IRGC 45237-2	IRIS 313-11352	IRGC 128004	aro	5.5	C	C	A	G	T	G	G	A	G	C		G	C	C	A	T	G	C	C	A	T	A	C	G	G	G	C	G	C	G	G			A	C/G	C		G	G	C	0
0	IRIS_313-11354	A/A	1	CAC 75::IRGC 45352-2	IRIS 313-11354	IRGC 128008	ind2	8	T	C	A	G	T	A	G	A	G	C	C	G	C	C	A	T	G	C	C	A	T	A	C	G	G	G	C	G	C	G	A	C	G	A	C	C	G	G	G	C	0
0	IRIS_313-11360	A/A	1	JALADHI 1::IRGC 45858-2	IRIS 313-11360	IRGC 132342	aro	8	C	C	A	G	T	A	G	A	G	C	C	G	C	C	A	T	G	C	C	A	T	A	C	G	G	G	C	G	C	G	A	C	G	A	C	A		G	G	C	0
0	IRIS_313-11407	A/A	1	BATCHA BHOG (SCENTED)::IRGC 49440-2	IRIS 313-11407	IRGC 127989	ind2	11	C	C	A	G	T	G	G	A	G	C	T	G	C	C	A	T	G	C	C	G	T	A	C	G	G	C	C	G	C	C	G	T	T	A	G	C	A	G	G	C	0
0	IRIS_313-11438	A/A	1	ZACATEPEC A 79::IRGC 51116-1	IRIS 313-11438	IRGC 127909	indx	11	C	C	A	G	T	G	G	A	G	C	T	G	C	C	A	T	G	C	C	G	T	A	C	G	G	C	C	G	C	C	G	T	T	A	G	C	A	G	G	C	0
0	IRIS_313-11536	A/A	1	WIR 2091::IRGC 57536-1	IRIS 313-11536	IRGC 128502	temp	11	C	C	A	G	T	G	G	A	G	C	T	G	C	C	A	T	G	C	C	G	T	A	C	G	G	C	C	G	C	C	G	T	T	A	G	C	A	G	G	C	0
0	IRIS_313-11537	A/A	1	J 6 IR 438 (WC 694)::IRGC 57599-1	IRIS 313-11537	IRGC 127446	trop	11	C	C	A	G	T	G	G	A	G	C	T	G	C	C	A	T	G	C	C	G	T	A	C	G	G	C	C	G	C	C	G	T	T	A	G	C	A	G	G	C	0
0	IRIS_313-11538	A/A	1	J 6 IR 520 (WC 693)::IRGC 57600-1	IRIS 313-11538	IRGC 127447	ind1B	11	C	C	A	G	T	G	G	A	G	C	T	G	C	C	A	T	G	C	C	G	T	A	C	G	G	C	C	G	C	C	G	T	T	A	G	C	A	G	G	C	0
0	IRIS_313-11542	A/A	1	KHAO KUM PAR::IRGC 57966-1	IRIS 313-11542	IRGC 132402	admix	8	C	C	A	G	T	A	G	A	G	C	C	G	C	C	A	T	G	C	C	A	T	A	C	G	G	G	C	G	C	G	A	C	G	A	C	A	G	G	G	C	0
0	IRIS_313-11565	A/A	1	KUSUM KATIKI::IRGC 59099-1	IRIS 313-11565	IRGC 127536	ind2	8	T	C	A	G	T	A	G	A	G	C	C	G	C	C	A	T	G	C	C	A	T	A	C	G	G	G	C	G	C	G	A	C	G	A	C	C	G	G	G	C	0
0	IRIS_313-11568	A/A	1	SATHIYA::IRGC 59225-1	IRIS 313-11568	IRGC 127789	ind1A	11	C	C	A	G	T	G	G	A	G	C	T	G	C	C	A	T	G	C	C	G	T	A	C	G	G	C	C	G	C	C	G	T	T	A	G	C	A	G	G	C	0
0	IRIS_313-11572	A/A	1	BAI MI TIE QIU::IRGC 59414-1	IRIS 313-11572	IRGC 127201	ind1A	11	C	C	A	G	T	G	G	A	G	C	T	G	C	C	A	T	G	C	C	G	T	A	C	G	G	C	C	G	C	C	G	T	T	A	G	C	A	G	G	C	0
0	IRIS_313-11575	A/A	1	HONG PI NUO::IRGC 59638-1	IRIS 313-11575	IRGC 127415	temp	11	C	C	A	G	T	G	G	A	G	C	T	G	C	C	A	T	G	C	C	G	T	A	C	G	G	C	C	G	C	C	G	T	T	A	G	C	A	G	G	C	0
0	IRIS_313-11577	A/A	1	LANG QIAN CHE::IRGC 59730-1	IRIS 313-11577	IRGC 127551	ind1A	11	C	C	A	G	T	G	G	A	G	C	T	G	C	C	A	T	G	C	C	G	T	A	C	G	G	C	C	G	C	C	G	T	T	A	G	C	A	G	G	C	0
0	IRIS_313-11582	A/A	1	WAN GENG BAI DAO TOU::IRGC 59948-1	IRIS 313-11582	IRGC 128499	temp	11	C	C	A	G	T	G	G	A	G	C	T	G	C	C	A	T	G	C	C	G	T	A	C	G	G	C	C	G	C	C	G	T	T	A	G	C	A	G	G	C	0
0	IRIS_313-11584	A/A	1	YI SUI QI::IRGC 60088-1	IRIS 313-11584	IRGC 128508	temp	11	C	C	A	G	T	G	G	A	G	C	T	G	C	C	A	T	G	C	C	G	T	A	C	G	G	C	C	G	C	C	G	T	T	A	G	C	A		G	C	0
0	IRIS_313-11597	A/A	1	BHATA PYAGI::IRGC 60895-1	IRIS 313-11597	IRGC 127222	ind2	11	C	C	A	G	T	G	G	A	G	C	T	G	C	C	A	T	G	C	C	G	T	A	C	G	G	C	C	G	C	C	G	T	T	A	G	C	A	G	G	C	0
0	IRIS_313-11606	A/A	1	BOKDEL::IRGC 61085-1	IRIS 313-11606	IRGC 127233	ind2	11	C	C	A	G	T	G	G	A	G	C	T	G	C	C	A	T	G	C	C	G	T	A	C	G	G	C	C	G	C	C	G	T	T	A	G	C	A	G	G	C	0
0	IRIS_313-11611	A/A	1	YAH YAW::IRGC 61359-1	IRIS 313-11611	IRGC 127898	trop	11	C	C	A	G	T	G	G	A	G	C	T	G	C	C	A	T	G	C	C	G	T	A	C	G	G	C	C	G	C	C	G	T	T	A	G	C	A	G	G	C	0
0	IRIS_313-11655	A/A	1	SI WAN 14::IRGC 63019-1	IRIS 313-11655	IRGC 127815	temp	11	C	C	A	G	T	G	G	A	G	C	T	G	C	C	A	T	G	C	C	G	T	A	C	G	G	C	C	G	C	C	G	T	T	A	G	C	A	G	G	C	0
0	IRIS_313-11684	A/A	1	OB CHUEY::IRGC 64568-1	IRIS 313-11684	IRGC 132021	ind3	11	C	C	A	G	T	G	G	A	G	C	T	G	C	C	A	T	G	C	C	G	T	A	C	G	G	C	C	G	C	C	G	T	T	A	G	C	A	G	G	C	0
0	IRIS_313-11714	A/A	1	CHAMPION::IRGC 66327-1	IRIS 313-11714	IRGC 127256	indx	11	C	C	A	G	T	G	G	A	G	C	T	G	C	C	A	T	G	C	C	G	T	A	C	G	G	C	C	G	C	C	G	T	T	A	G	C	A	G	G	C	0
0	IRIS_313-11724	A/A	1	KONYAN::IRGC 66931-1	IRIS 313-11724	IRGC 127531	ind3	11	C	C	A	G	T	G	G	A	G	C	T	G	C	C	A	T	G	C	C	G	T	A	C	G	G	C	C	G	C	C	G	T	T	A	G	C	A	G	G	C	0
0	IRIS_313-11734	A/A	1	SI CHAO 1::IRGC 67335-1	IRIS 313-11734	IRGC 127803	ind1A	11	C	C	A	G	T	G	G	A	G	C	T	G	C	C	A	T	G	C	C	G	T	A	C	G	G	C	C	G	C	C	G	T	T	A	G	C	A	G	G	C	0
0	IRIS_313-11744	A/A	1	AI JIAO AO FAN ZI::IRGC 67871-1	IRIS 313-11744	IRGC 127114	indx	11	C	C	A	G	T	G	G	A	G	C	T	G	C	C	A	T	G	C	C	G	T	A	C	G	G	C	C	G	C	C	G	T	T	A	G	C	A	G	G	C	0
0	IRIS_313-11746	A/A	1	E 2070::IRGC 67981-1	IRIS 313-11746	IRGC 127349	ind1A	11	C	C	A	G	T	G	G	A	G	C	T	G	C	C	A	T	G	C	C	G	T	A	C	G	G	C	C	G	C	C	G	T	T	A	G	C	A	G	G	C	0
0	IRIS_313-11763	A/A	1	PJ 110::IRGC 68981-1	IRIS 313-11763	IRGC 127734	indx	5	C	C	A	T	T	G	G	A	G	C	C	G	C	C	A	T	G	C	C	G	T	A	C	G	G	G	C	G	C	G	G	C	G	A	C	C	G	G	G	C	0
0	IRIS_313-11773	A/A	1	AUS 78-125::IRGC 69464-1	IRIS 313-11773	IRGC 132275	ind3	11	C	C	A	G	T	G	G	A	G	C	T	G	C	C	A	T	G	C	C	G	T	A	C	G	G	C	C	G	C	C	G	T	T	A	G	C	A	G	G	C	0
0	IRIS_313-11784	A/A	1	MBEIMBEIHUN::IRGC 69730-1	IRIS 313-11784	IRGC 127619	ind1B	11	C	C	A	G	T	G	G	A	G	C	T	G	C	C	A	T	G	C	C	G	T	A	C	G	G	C	C	G	C	C	G	T	T	A	G	C	A	G	G	C	0
0	IRIS_313-11786	A/A	1	N'YA NOFF::IRGC 69749-1	IRIS 313-11786	IRGC 128411	ind3	11	C	C	A	G	T	G	G	A	G	C	T	G	C	C	A	T	G	C	C	G	T	A	C	G	G	C	C	G	C	C	G	T	T	A	G	C	A	G	G	C	0
0	IRIS_313-11787	A/A	1	TANDAKAY FINGO::IRGC 69793-1	IRIS 313-11787	IRGC 127845	ind2	11	C	C	A	G	T	G	G	A	G	C	T	G	C	C	A	T	G	C	C	G	T	A	C	G	G	C	C	G	C	C	G	T	T	A	G	C	A	G	G	C	0
0	IRIS_313-11799	A/A	1	E ZI 110::IRGC 70201-1	IRIS 313-11799	IRGC 127366	ind1A	11	C	C	A	G	T	G	G	A	G	C	T	G	C	C	A	T	G	C	C	G	T	A	C	G	G	C	C	G	C	C	G	T	T	A	G	C	A	G	G	C	0
0	IRIS_313-11813	A/A	1	ZERO::IRGC 70707-2	IRIS 313-11813	IRGC 132372	ind3	11	C	C	A	G	T	G	G	A	G	C	T	G	C	C	A	T	G	C	C	G	T	A	C	G	G	C	C	G	C	C	G	T	T	A	G	C	A	G	G	C	0
0	IRIS_313-11822	A/A	1	BHONDU PAREWA::IRGC 70802-1	IRIS 313-11822	IRGC 135738	ind2	11	C	C	A	G	T	G	G	A	G	C	T	G	C	C	A	T	G	C	C	G	T	A	C	G	G	C	C	G	C	C	G	T	T	A	G	C	A	G	G	C	0
0	IRIS_313-11832	A/A	1	AE WAWNG POO DOO::IRGC 71007-1	IRIS 313-11832	IRGC 131964	subtrop	11	C	C	A	G	T	G	G	A	G	C	T	G	C	C	A	T	G	C	C	G	T	A	C	G	G	C	C	G	C	C	G	T	T	A	G	C	A	G	G	C	0
0	IRIS_313-11838	A/A	1	LEUM DERN::IRGC 71288-1	IRIS 313-11838	IRGC 132389	ind3	8	T	C	A	G	T	A	G	A	G	C	C	G	C	C	A	T	G	C	C	A	T	A	C	G	G	G	C	G	C	G	A	C	G	A	C	C	G	G	G	C	0
0	IRIS_313-11859	A/A	1	DONG DU::IRGC 72037-1	IRIS 313-11859	IRGC 127339	ind1A	11	C	C	A	G	T	G	G	A	G	C	T	G	C	C	A	T	G	C	C	G	T	A	C	G	G	C	C	G	C	C	G	T	T	A	G	C	A	G	G	C	0
0	IRIS_313-11862	A/A	1	HENG YE ZAO::IRGC 72092-1	IRIS 313-11862	IRGC 127406	ind1A	11	C	C	A	G	T	G	G	A	G	C	T	G	C	C	A	T	G	C	C	G	T	A	C	G	G	C	C	G	C	C	G	T	T	A	G	C	A	G	G	C	0
0	IRIS_313-11869	A/A	1	MA WEI ZHAN::IRGC 72220-1	IRIS 313-11869	IRGC 127615	ind1A	11	C	C	A	G	T	G	G	A	G	C	T	G	C	C	A	T	G	C	C	G	T	A	C	G	G	C	C	G	C	C	G	T	T	A	G	C	A	G	G	C	0
0	IRIS_313-11870	A/A	1	NAN JING XIAO DAO::IRGC 72236-2	IRIS 313-11870	IRGC 132429	ind1A	11	C	C	A	G	T	G	G	A	G	C	T	G	C	C	A	T	G	C	C	G	T	A	C	G	G	C	C	G	C	C	G	T	T	A	G	C	A	G	G	C	0
0	IRIS_313-11876	A/A	1	AI DA::IRGC 72567-1	IRIS 313-11876	IRGC 127113	ind1A	11	C	C	A	G	T	G	G	A	G	C	T	G	C	C	A	T	G	C	C	G	T	A	C	G	G	C	C	G	C	C	G	T	T	A	G	C	A	G	G	C	0
0	IRIS_313-11877	A/A	1	AN NAN ZAO::IRGC 72576-1	IRIS 313-11877	IRGC 127125	ind1A	11	C	C	A	G	T	G	G	A	G	C	T	G	C	C	A	T	G	C	C	G	T	A	C	G	G	C	C	G	C	C	G	T	T	A	G	C	A	G	G	C	0
0	IRIS_313-11882	A/A	1	MAN TIAN QING::IRGC 72776-1	IRIS 313-11882	IRGC 127605	ind1A	11	C	C	A	G	T	G	G	A	G	C	T	G	C	C	A	T	G	C	C	G	T	A	C	G	G	C	C	G	C	C	G	T	T	A	G	C	A	G	G	C	0
0	IRIS_313-11885	A/A	1	YANG WAN XIAN::IRGC 72886-1	IRIS 313-11885	IRGC 127899	ind1A	11	C	C	A	G	T	G	G	A	G	C	T	G	C	C	A	T	G	C	C	G	T	A	C	G	G	C	C	G	C	C	G	T	T	A	G	C	A	G	G	C	0
0	IRIS_313-11895	A/A	1	BA TUC RAN::IRGC 73239-1	IRIS 313-11895	IRGC 132391	ind3	11	C	C	A	G	T	G	G	A	G	C	T	G	C	C	A	T	G	C	C	G	T	A	C	G	G	C	C	G	C	C	G	T	T	A	G	C	A	G	G	C	0
0	IRIS_313-11945	A/A	1	MALIKULI::IRGC 76237-1	IRIS 313-11945	IRGC 127598	ind2	4	C	C	A	G	T	G	G	A	G	C	C	G	C	C	A	T	G	C	C	G	T	A	C	G	G	G	C	G	C	G	G	C	G	A	C	C	G	G	G	C	0
0	IRIS_313-11951	A/A	1	MIAO ZHAN::IRGC 76691-1	IRIS 313-11951	IRGC 127625	ind1A	11	C	C	A	G	T	G	G	A	G	C	T	G	C	C	A	T	G	C	C	G	T	A	C	G	G	C	C	G	C	C	G	T	T	A	G	C	A	G	G	C	0
0	IRIS_313-11973	A/A	1	NOINJO::IRGC 77669-1	IRIS 313-11973	IRGC 132020	temp	11	C	C	A	G	T	G	G	A	G	C	T	G	C	C	A	T	G	C	C	G	T	A	C	G	G	C	C	G	C	C	G	T	T	A	G	C	A	G	G	C	0
0	IRIS_313-12016	A/A	1	EX AUBERGE::IRGC 79898-1	IRIS 313-12016	IRGC 135751	indx	11	C	C	A	G	T	G	G	A	G	C	T	G	C	C	A	T	G	C	C	G	T	A	C	G	G	C	C	G	C	C	G	T	T	A	G	C	A	G	G	C	0
0	IRIS_313-12024	A/A	1	TOS 9795::IRGC 80142-1	IRIS 313-12024	IRGC 127866	ind1B	11	C	C	A	G	T	G	G	A	G	C	T	G	C	C	A	T	G	C	C	G	T	A	C	G	G	C	C	G	C	C	G	T	T	A	G	C	A	G	G	C	0
0	IRIS_313-12033	A/A	1	GAO JIAO HONG::IRGC 80920-1	IRIS 313-12033	IRGC 127377	ind1A	11	C	C	A	G	T	G	G	A	G	C	T	G	C	C	A	T	G	C	C	G	T	A	C	G	G	C	C	G	C	C	G	T	T	A	G	C	A	G	G	C	0
0	IRIS_313-12041	A/A	1	NOU::IRGC 81352-1	IRIS 313-12041	IRGC 132413	ind3	11	C	C	A	G	T	G	G	A	G	C	T	G	C	C	A	T	G	C	C	G	T	A	C	G	G	C	C	G	C	C	G	T	T	A	G	C	A	G	G	C	0
0	IRIS_313-12053	A/A	1	FACAGRO 406::IRGC 82049-1	IRIS 313-12053	IRGC 127367	indx	11	C	C	A	G	T	G	G	A	G	C	T	G	C	C	A	T	G	C	C	G	T	A	C	G	G	C	C	G	C	C	G	T	T	A	G	C	A	G	G	C	0
0	IRIS_313-12057	A/A	1	AI JIAO ZI::IRGC 82255-1	IRIS 313-12057	IRGC 127116	indx	11	C	C	A	G	T	G	G	A	G	C	T	G	C	C	A	T	G	C	C	G	T	A	C	G	G	C	C	G	C	C	G	T	T	A	G	C	A	G	G	C	0
0	IRIS_313-12127	A/A	1	INPONG::IRGC 85524-1	IRIS 313-12127	IRGC 127431	ind3	11	C	C	A	G	T	G	G	A	G	C	T	G	C	C	A	T	G	C	C	G	T	A	C	G	G	C	C	G	C	C	G	T	T	A	G	C	A	G	G	C	0
0	IRIS_313-12151	A/A	1	DAMNOEUB KRACHAK SESS::IRGC 87380-1	IRIS 313-12151	IRGC 132279	ind3	11	C	C	A	G	T	G	G	A	G	C	T	G	C	C	A	T	G	C	C	G	T	A	C	G	G	C	C	G	C	C	G	T	T	A	G	C	A	G	G	C	0
0	IRIS_313-12190	A/A	1	CHAO KHAW NYAO::IRGC 89460-1	IRIS 313-12190	IRGC 131975	indx	8.5	T	C	A	G	T	A	G/T	A	G	C	C	G	C	C	A	T	G	C	C	A	T	A	C	G	G	G	C	G	C	G	A	C	G	A	C	C	G	G	G	C	0
0	IRIS_313-12236	A/A	1	LAOZAOGU::IRGC 93444-1	IRIS 313-12236	IRGC 127552	ind1A	11	C	C	A	G	T	G	G	A	G	C	T	G	C	C	A	T	G	C	C	G	T	A	C	G	G	C	C	G	C	C	G	T	T	A	G	C	A	G	G	C	0
0	IRIS_313-12237	A/A	1	WUGU::IRGC 93479-1	IRIS 313-12237	IRGC 127893	ind1A	11	C	C	A	G	T	G	G	A	G	C	T	G	C	C	A	T	G	C	C	G	T	A	C	G	G	C	C	G	C	C	G	T	T	A	G	C	A	G	G	C	0
0	IRIS_313-12258	A/A	1	DON::IRGC 95117-1	IRIS 313-12258	IRGC 128283	subtrop	11	C	C	A	G	T	G	G	A	G	C	T	G	C	C	A	T	G	C	C	G	T	A	C	G	G	C	C	G	C	C	G	T	T	A	G	C	A	G	G	C	0
0	IRIS_313-12273	A/A	1	AIJIAONANTE::IRGC 96974-1	IRIS 313-12273	IRGC 127115	ind1A	12	C	C	A	G	T	G	G	A	G	C	T	G	C	C	A	T	G	C	C	G	T	A	C	G	G	C	C	G	C	C	G	T	T	A	G	C	A	A	G	C	0
0	IRIS_313-12296	A/A	1	SABALINE::IRGC 98059-1	IRIS 313-12296	IRGC 127773	ind3	11	C	C	A	G	T	G	G	A	G	C	T	G	C	C	A	T	G	C	C	G	T	A	C	G	G	C	C	G	C	C	G	T	T	A	G	C	A	G	G	C	0
0	IRIS_313-12299	A/A	1	MUANG TAY::IRGC 98382-1	IRIS 313-12299	IRGC 136100	subtrop	11	C	C	A	G	T	G	G	A	G	C	T	G	C	C	A	T	G	C	C	G	T	A	C	G	G	C	C	G	C	C	G	T	T	A	G	C	A	G	G	C	0
0	IRIS_313-12311	A/A	1	TAM::IRGC 99161-1	IRIS 313-12311	IRGC 128481	subtrop	11	C		A	G	T	G	G	A	G	C	T	G	C	C	A	T	G	C	C	G	T	A	C	G	G	C	C	G	C	C	G	T	T	A	G	C	A	G	G	C	0
0	IRIS_313-12345	A/A	1	VIENG::IRGC 107375-2	IRIS 313-12345	IRGC 128201	subtrop	11	C	C	A	G	T	G	G	A	G	C	T	G	C	C	A	T	G	C	C	G	T	A	C	G	G	C	C	G	C	C	G	T	T	A	G	C	A	G	G	C	0
0	IRIS_313-7654	A/A	1	BOUAKE 189::C1	IRIS 313-7654	IRGC 126997	ind1B	11	C	C	A	G	T	G	G	A	G	C	T	G	C	C	A	T	G	C	C	G	T	A	C	G	G	C	C	G	C	C	G	T	T	A	G	C	A	G	G	C	0
0	IRIS_313-7766	A/A	1	SAHEL 108::C1	IRIS 313-7766	IRGC 122232	ind1B	11	C	C	A	G	T	G	G	A	G	C	T	G	C	C	A	T	G	C	C	G	T	A	C	G	G	C	C	G	C	C	G	T	T	A	G	C	A	G	G	C	0
0	IRIS_313-7770	A/A	1	SAMBALA MALO::C1	IRIS 313-7770	IRGC 122239	ind1B	11	C	C	A	G	T	G	G	A	G	C	T	G	C	C	A	T	G	C	C	G	T	A	C	G	G	C	C	G	C	C	G	T	T	A	G	C	A	G	G	C	0
0	IRIS_313-7815	A/A	1	WAS 198-B-3-1-3::C1	IRIS 313-7815	IRGC 122287	ind1B	11	C	C	A	G	T	G	G	A	G	C	T	G	C	C	A	T	G	C	C	G	T	A	C	G	G	C	C	G	C	C	G	T	T	A	G	C	A	G	G	C	0
0	IRIS_313-7819	A/A	1	WAS 203-B-B-2-4-1::C1	IRIS 313-7819	IRGC 122289	ind1B	11	C	C	A	G	T	G	G	A	G	C	T	G	C	C	A	T	G	C	C	G	T	A	C	G	G	C	C	G	C	C	G	T	T	A	G	C	A	G	G	C	0
0	IRIS_313-7820	A/A	1	WAS 206-B-B-2-2-1::C1	IRIS 313-7820	IRGC 122290	ind1B	11	C	C	A	G	T	G	G	A	G	C	T	G	C	C	A	T	G	C	C	G	T	A	C	G	G	C	C	G	C	C	G	T	T	A	G	C	A	G	G	C	0
0	IRIS_313-7826	A/A	1	WAS 33-B-B-15-1-4-5::C1	IRIS 313-7826	IRGC 122292	ind1B	11	C	C	A	G	T	G	G	A	G	C	T	G	C	C	A	T	G	C	C	G	T	A	C	G	G	C	C	G	C	C	G	T	T	A	G	C	A	G	G	C	0
0	IRIS_313-7883	A/A	1	GANIGI::IRGC 48698-C1	IRIS 313-7883	IRGC 122052	trop	8	T	C	A	G	T	A	G	A	G	C	C	G	C	C	A	T	G	C	C	A	T	A	C	G	G	G	C	G	C	G	A	C	G	A	C	C	G	G	G	C	0
0	IRIS_313-7911	A/A	1	IR 72967-12-2-3::C1	IRIS 313-7911	IRGC 122111	ind1B	11	C	C	A	G	T	G	G	A	G	C	T	G	C	C	A	T	G	C	C	G	T	A	C	G	G	C	C	G	C	C	G	T	T	A	G	C	A	G	G	C	0
0	IRIS_313-8029	A/A	1	GRITNA::GERVEX 71-C1	IRIS 313-8029	IRGC 122073	japx	11	C	C	A	G	T	G		A	G	C	T	G	C	C	A	T	G	C	C	G	T	A	C	G	G	C	C	G	C	C	G	T	T	A	G	C	A	G	G	C	0
0	IRIS_313-8049	A/A	1	LORD::GERVEX 127-C1	IRIS 313-8049	IRGC 122150	japx	11	C	C	A	G	T	G	G	A	G	C	T	G	C	C	A	T	G	C	C	G	T	A	C	G	G	C	C	G	C	C	G	T	T	A	G	C	A	G	G	C	0
0	IRIS_313-8073	A/A	1	DAWN CI 9534::GERVEX 481-C1	IRIS 313-8073	IRGC 122033	aus	11	C	C	A	G	T	G	G	A	G	C	T	G	C	C	A	T	G	C	C	G	T	A	C	G	G	C	C	G	C	C	G	T	T	A	G	C	A	G	G	C	0
0	IRIS_313-8113	A/A	1	ESCARLATE::GERVEX 887-C1	IRIS 313-8113	IRGC 122043	temp	11	C	C	A	G	T	G	G	A	G	C	T	G	C	C	A	T	G	C	C	G	T	A	C	G	G	C	C	G	C	C	G	T	T	A	G	C	A	G	G	C	0
0	IRIS_313-8126	A/A	1	PLOVDIV 24::GERVEX 1168-C1	IRIS 313-8126	IRGC 122204	temp	11	C	C	A	G	T	G	G	A	G	C	T	G	C	C	A	T	G	C	C	G	T	A	C	G	G	C	C	G	C	C	G	T	T	A	G	C	A	G	G	C	0
0	IRIS_313-8136	A/A	1	SAFARI::GERVEX 1256-C1	IRIS 313-8136	IRGC 121819	temp	11	C	C	A	G	T	G	G	A	G	C	T	G	C	C	A	T	G	C	C	G	T	A	C	G	G	C	C	G	C	C	G	T	T	A	G	C	A	G	G	C	0
0	IRIS_313-8147	A/A	1	T 757::GERVEX 1316-C1	IRIS 313-8147	IRGC 122259	temp	11	C	C	A	G	T	G	G	A	G	C	T	G	C	C	A	T	G	C	C	G	T	A	C	G	G	C	C	G	C	C	G	T	T	A	G	C	A	G	G	C	0
0	IRIS_313-8380	A/A	1	SAN CHIAO TSWEN::IRGC 1565-1	IRIS 313-8380	IRGC 126123	ind1A	11	C	C	A	G	T	G	G	A	G	C	T	G	C	C	A	T	G	C	C	G	T	A	C	G	G	C	C	G	C	C	G	T	T	A	G	C	A	G	G	C	0
0	IRIS_313-8433	A/A	1	CHANG LE SAN SHU ZAO::IRGC 63561-1	IRIS 313-8433	IRGC 126115	ind1A	11	C	C	A	G	T	G	G	A	G	C	T	G	C	C	A	T	G	C	C	G	T	A	C	G	G	C	C	G	C	C	G	T	T	A	G	C	A	G	G	C	0
0	IRIS_313-8444	A/A	1	M 203::IRGC 76309-1	IRIS 313-8444	IRGC 126118	temp	9.5	C	C	A	G	T	G	G	A	G	C	T	G	C	C	A	T	G	C	C	G	T	A	C	G	G	C	C	G	C		G	T	T	A	C/G	C	A	G	G	C	0
0	IRIS_313-8627	A/A	1	PRELUDE::IRGC 1790-1	IRIS 313-8627	IRGC 126260	trop	11	C	C	A	G	T	G	G	A	G	C	T	G	C	C	A	T	G	C	C	G	T	A	C	G	G	C	C	G	C	C	G	T	T	A	G	C	A	G	G	C	0
0	IRIS_313-8745	A/A	1	SD 120 SELN (CI 12320)::IRGC 1667-1	IRIS 313-8745	IRGC 126087	trop	11	C	C	A	G	T	G	G	A	G	C	T	G	C	C	A	T	G	C	C	G	T	A	C	G	G	C	C	G	C	C	G	T	T	A	G	C	A	G	G	C	0
0	IRIS_313-8765	A/A	1	TIMMURAY::IRGC 67857-1	IRIS 313-8765	IRGC 126284	aro	5	C	C	A	G	T	G	G	A	G	C	C	G	C	C	A	T	G	C	C	A	T	A	C	G	G	G	C	G	C	G	G	C	G	A	C	C	G	G	G	C	0
0	IRIS_313-8813	A/A	1	ARC 10497	IRIS 313-8813	IRGC 117425	aro	5	C	C	A	G	T	G	G	A	G	C	C	G	C	C	A	T	G	C	C	A	T	A	C	G	G	G	C	G	C	G	G	C	G	A	C	C	G	G	G	C	0
0	IRIS_313-8814	A/A	1	SHANKA::IRGC 67848-1	IRIS 313-8814	IRGC 121499	aro	5	C	C	A		T	G	G	A	G	C	C	G	C	C	A	T	G	C	C	A	T	A	C	G	G	G	C	G	C	G	G	C	G	A	C	C	G	G	G	C	0
0	IRIS_313-8859	A/A	1	E ZI 96::IRGC 70188-1	IRIS 313-8859	IRGC 125738	ind1A	8	C	C	A	G	T	G	G	A	G	C	T	G	C	C	A	T	G	C		G	T	A	C	G	G		C	G	C	C	G	T		A		C	A	G	G	C	0
0	IRIS_313-8884	A/A	1	E WAWNG::IRGC 71140-1	IRIS 313-8884	IRGC 126134	subtrop	10	C	C	A	G	T	G	G	A	T/G	C	T	G	C	C	A	T	G	C	C	G	T	A	C	G	G	C		G	C	C	G	T	T	A	C/G	C	A	G	G	C	0
0	IRIS_313-8900	A/A	1	ARC 14654::IRGC 41663-1	IRIS 313-8900	IRGC 125650	ind2	10.5	C	C	A	G	T	G	G	A	G	C	T	G	C	C	A	T	G	C	C	G	T	A	C	G	G	C	C	A/G	C	C	G	T	T	A	G	C	A	G	G	C	0
0	IRIS_313-8930	A/A	1	MUKKALA BAZAL::IRGC 77279-1	IRIS 313-8930	IRGC 125844	ind1B	11	C	C	A	G	T	G	G	A	G	C	T	G	C	C	A	T	G	C	C	G	T	A	C	G	G	C	C	G	C	C	G	T	T	A	G	C	A	G	G	C	0
0	IRIS_313-8960	A/A	1	BLUEBONNET::IRGC 1799-1	IRIS 313-8960	IRGC 125688	trop	8	T	C	A	G	T	A	G	A	G	C	C	G	C	C	A	T	G	C	C	A	T	A	C	G	G	G	C	G	C	G	A	C	G	A	C	C	G	G	G	C	0
0	IRIS_313-8988	A/A	1	BANIKAT::IRGC 67720-1	IRIS 313-8988	IRGC 125672	ind2	11	C	C	A	G	T	G	G	A	G	C	T	G	C	C	A	T	G	C	C	G	T	A	C	G	G	C	C	G	C	C	G	T	T	A	G	C	A	G	G	C	0
0	IRIS_313-9066	A/A	1	AUS 177::IRGC 29009-1	IRIS 313-9066	IRGC 125659	ind1B	11	C	C	A	G	T	G	G	A	G	C	T	G	C	C	A	T	G	C	C	G	T	A	C	G	G	C	C	G	C	C	G	T	T	A	G	C	A	G	G	C	0
0	IRIS_313-9072	A/A	1	MUTA GANJE::IRGC 26744-1	IRIS 313-9072	IRGC 125847	ind2	11	C	C	A	G	T	G	G	A	G	C	T	G	C	C	A	T	G	C	C	G	T	A	C	G	G	C	C	G	C	C	G	T	T	A	G	C	A	G	G	C	0
0	IRIS_313-9209	A/A	1	LEUANG LAI MAE PRAJAN::IRGC 71279-1	IRIS 313-9209	IRGC 126984	ind3	11	C	C	A	G	T	G	G	A	G	C	T	G	C	C	A	T	G	C	C	G	T	A	C	G	G	C	C	G	C	C	G	T	T	A	G	C	A	G	G	C	0
0	IRIS_313-9267	A/A	1	CHIRGUA 1 I 22::IRGC 3408-1	IRIS 313-9267	IRGC 125703	trop	10.5	C	C	A	G	T	G	G	A	G	C	T	A/G	C	C	A	T	G	C	C	G	T	A	C		G	C	C	G	C	C	G	T	T	A	G	C	A	G	G	C	0
0	IRIS_313-9325	A/A	1	SADA RUPA::IRGC 77299-1	IRIS 313-9325	IRGC 125894	ind1B	11	C	C	A	G	T	G	G	A	G	C	T	G	C	C	A	T	G	C	C	G	T	A	C	G	G	C	C	G	C	C	G	T	T	A	G	C	A	G	G	C	0
0	IRIS_313-9404	A/A	1	YANGKUM (RED)	IRIS 313-9404	IRGC 117593	admix	7.5	C	C	A	G	T	G	G	A	T/G	C	C/T	G	C	C	A	T	G	C	C	G	T	A	C	G	G	G/C	C/T	G	C	G/C	G	C/T	G/T	A	C/G	C	G/A	G	G	C	0
0	IRIS_313-9523	A/A	1	RIKUTO KEMOCHI	IRIS 313-9523	IRGC 117569	japx	11	C	C	A	G	T	G	G	A	G	C	T	G	C	C	A	T	G	C	C	G	T	A	C	G	G	C	C	G	C	C	G	T	T	A	G	C	A	G	G	C	0
0	IRIS_313-9582	A/A	1	SADOK::IRGC 13334-1	IRIS 313-9582	IRGC 131917	ind3	11	C	C	A	G	T	G	G	A	G	C	T	G	C	C	A	T	G	C	C	G	T	A	C	G	G	C	C	G	C	C	G	T	T	A	G	C	A	G	G	C	0
0	IRIS_313-9602	A/A	1	HTA 22::IRGC 45827-1	IRIS 313-9602	IRGC 125765	indx	11	C	C	A	G	T	G	G	A	G	C	T	G	C	C	A	T	G	C	C	G	T	A	C	G	G	C	C	G	C	C	G	T	T	A	G	C	A	G	G	C	0
0	IRIS_313-9641	A/A	1	BEGUM::IRGC 33990-1	IRIS 313-9641	IRGC 125602	aus	6	C	C	A	G	T	G	G	A	G	C	C	G	C	C	A	T	G	C	T	A	T	A		G	G		C	G	C	G	G	C	G	A	C	C	G	G	G	C	0
0	IRIS_313-9725	A/A	1	DA DAO TOU::IRGC 59499-1	IRIS 313-9725	IRGC 125718	temp	11	C	C	A	G	T	G	G	A	G	C	T	G	C	C	A	T	G	C	C	G	T	A	C	G	G	C	C	G	C	C	G	T	T	A	G	C	A	G	G	C	0
0	IRIS_313-9730	A/A	1	BA SHI ZAO::IRGC 67903-1	IRIS 313-9730	IRGC 125675	ind1A	11	C	C	A	G	T	G	G	A	G	C	T	G	C	C	A	T	G	C	C	G	T	A	C	G	G	C	C	G	C	C	G	T	T	A	G	C	A	G	G	C	0
0	IRIS_313-9851	A/A	1	GOGOWIERIE::IRGC 14791-1	IRIS 313-9851	IRGC 126977	trop	11	C	C	A	G	T	G	G	A	G	C	T	G	C	C	A	T	G	C	C	G	T	A	C	G	G	C	C	G	C	C	G	T	T	A	G	C	A	G	G	C	0
0	IRIS_313-9924	A/A	1	KN 1 B 361-1-8-6-9::IRGC 46974-1	IRIS 313-9924	IRGC 125805	indx	5	C	C	A	T	T	G	G	A	G	C	C	G	C	C	A	T	G	C	C	G	T	A	C	G	G	G	C	G	C	G	G	C	G	A	C	C	G	G	G	C	0
0	IRIS_313-9926	A/A	1	TOURBE::IRGC 47066-1	IRIS 313-9926	IRGC 126162	indx	8	T	C	A	G	T	A	G	A	G	C	C	G	C	C	A	T	G	C	C	A	T	A	C	G	G	G	C	G	C	G	A	C	G		C	C	G	G	G	C	0
0	IRIS_313-9949	A/A	1	PANNITHI::IRGC 51049-1	IRIS 313-9949	IRGC 126078	trop	4.5	C	C	A	G	T	G	G	A	T/G	C	C	G	C	C	A	T	G	C	C	A	T	A	C	G	G	G	C	G	C	G	G	C	G	A	C	C	G	G	G	C	0
0	IRIS_313-9976	A/A	1	SSANGDUJO::IRGC 55632-1	IRIS 313-9976	IRGC 125906	ind1A	11	C	C	A	G	T	G	G	A	G	C	T	G	C	C	A	T	G	C	C	G	T	A	C	G	G	C	C	G	C	C	G	T	T	A	G	C	A	G	G	C	0
0	IRIS_313-9980	A/A	1	FORTUNA INIA::IRGC 55865-1	IRIS 313-9980	IRGC 125741	japx	11	C	C	A	G	T	G	G	A	G	C	T	G	C	C	A	T	G	C	C	G	T	A	C	G	G	C	C	G	C	C	G	T	T	A	G	C	A	G	G	C	0
0	IRIS_313-9996	A/A	1	SUWEON 295::IRGC 58368-1	IRIS 313-9996	IRGC 126990	temp	11	C	C	A	G	T	G	G	A	G	C	T	G	C	C	A	T	G	C	C	G	T	A	C	G	G	C	C	G	C	C	G	T	T	A	G	C	A	G	G	C	0
1	IRIS_313-10020	G/G		HODARAWALA::IRGC 67631-1	IRIS 313-10020	IRGC 120968	aus	3	C	C	A	G	T	G	G	A	G	C	C	G	C	C	A	T	G	C	C	G	T	G	C	G	G	G	C	G	C	G	G	C	G	A	C	C	G	G	G	C	1
0	IRIS_313-10054	G/G		TOC 5430::IRGC 70487-1	IRIS 313-10054	IRGC 125924	indx	3.5	C	C	A	G	T	G	G	A	G	C	C	G	C	C	A	T	G	C/G	C	G	T	G	C	G	G	G	C	G	C	G	G	C	G	A	C	C	G	G	G	C	0
0	IRIS_313-10062	G/G		REA::IRGC 73031-1	IRIS 313-10062	IRGC 126141	trop	0	C	C	A	G	T	G	G	A	T	C	C	A	C	C	A	T	G	C	C	G	T	G	C	G	G	G	C	A	C	G	G	C	G	A	C	C	G	G	G	C	0
0	IRIS_313-10067	NA		JEONBUKGUNGWEONNA::IRGC 73055-1	IRIS 313-10067	IRGC 125783	trop	3	C	C	A	G	T	G	G	A	T	C	C	G	C	C	A	T	G	C	C	G	T		C	G	G	G	T	G	C	G	G	C	G	A	C	C	G	G	G	C	0
1	IRIS_313-10096	G/G		JOKJEBICHAL::IRGC 77663-1	IRIS 313-10096	IRGC 125787	japx	3	C	C	A	G	T	G	G	A	T	C	C	G	C	C	A	T	G	C	C	G	T	G	C	G	G	G	T	G	C	G	G	C	G	A	C	C	G	G	G	C	1
0	IRIS_313-10099	G/G		MANONGAZATO::IRGC 77876-1	IRIS 313-10099	IRGC 126303	trop	3	C	C	A	G	T	G	G	A	T	C	C	G	C	C	A	T	G	C	C	G	T	G	C	G	G	G	T	G	C	G	G	C	G	A	C	C	G	G	G	C	0
0	IRIS_313-10134	G/A		PIN GAEW 56::IRGC 7887-1	IRIS 313-10134	IRGC 125871	ind3	8.5	C	C	A	G	T	G	G	A	G	C	C/T	G	C	C	A	T	G	C	C	G	T	G/A	C	G	G	G/C	C	G	C	C	G	T	T	A	C/G	C	G/A	G	G	C	0
0	IRIS_313-10189	G/G		DA NUO (ZHAN)::IRGC 72025-1	IRIS 313-10189	IRGC 125723	ind1A	3	C	C	A	G	T	G	G	A	G	C	C	G	C	C	A	T	G	C	C	G	T	G	C	G	G	G	C	G	C	G	G	C	G	A	C	C	G	G	G	C	0
1	IRIS_313-10228	G/G		HAN NUO::IRGC 82350-1	IRIS 313-10228	IRGC 125758	temp	3	C	C	A	G	T	G	G	A	T	C	C	G	C	C	A	T	G	C	C	G	T	G	C	G	G	G	T	G	C	G	G	C	G	A	C	C	G	G	G	C	1
0	IRIS_313-10275	G/G		ICTA MOTAGUA::IRGC 116995-1	IRIS 313-10275	IRGC 125968	indx	4	C	C	A	G	T	G	G	A	G	C	C	G	C	C	A	T	G	G	C	G	T	G	C	G	G	G	C	G	C	G	G	C	G	A	C	C	G	G	G	C	0
0	IRIS_313-10290	G/G		ELONI::IRGC 116980-1	IRIS 313-10290	IRGC 125963	ind1B	4	C	C	A	G	T	G	G	A	G	C	C	G	C	C	A	T	G	G	C	G	T	G	C	G	G	G	C	G	C	G	G	C	G	A	C	C	G	G	G	C	0
1	IRIS_313-10318	G/G		RUSTIC::IRGC 117026-1	IRIS 313-10318	IRGC 126085	indx	3	C	C	A	G	T	G	G	A	T	C	C	G	C	C	A	T	G	C	C	G	T	G	C	G	G	G	T	G	C	G	G	C	G	A	C	C	G	G	G	C	1
0	IRIS_313-10333	G/G		B 6136-3-TB-0-1-5::IRGC 117312-1	IRIS 313-10333	IRGC 125951	ind1B	3	C	C	A	G	T	G	G	A	G	C	C	G	C	C	A	T	G	C	C	G	T	G	C	G	G	G	C	G	C	G	G	C	G	A	C	C	G	G	G	C	0
0	IRIS_313-10334	G/G		B 6136 E-3-TB-0-1-5::IRGC 117311-1	IRIS 313-10334	IRGC 125952	ind1B	3	C	C	A	G	T	G	G	A	G		C	G	C	C	A	T	G	C	C	G	T	G	C	G	G	G	C	G	C	G	G	C	G	A	C	C	G	G	G	C	0
0	IRIS_313-10375	G/G		IR 70027-8-2-2-3-2::IRGC 117382-1	IRIS 313-10375	IRGC 126028	indx	3	C	C	A	G	T	G	G	A	G	C	C	G	C	C	A	T	G	C	C	G	T	G	C	G	G	G	C	G	C	G	G	C	G	A	C	C	G	G	G	C	0
1	IRIS_313-10516	G/G		O. SATIVA::IRGC 5779-1	IRIS 313-10516	IRGC 127689	indx	3	C	C	A	G	T	G	G	A	G	C	C	G	C	C	A	T	G	C	C	G	T	G	C	G	G	G	C	G	C	G	G	C	G	A	C	C	G	G	G	C	1
1	IRIS_313-10519	G/G		ADT 22::IRGC 5901-1	IRIS 313-10519	IRGC 135733	ind2	3	C	C	A	G	T	G	G	A	G	C	C	G	C	C	A	T	G	C	C	G	T	G	C	G	G	G	C	G	C	G	G	C	G	A	C	C	G	G	G	C	1
1	IRIS_313-10576	G/A		BAANYALOJOPOIHUN::IRGC 7928-2	IRIS 313-10576	IRGC 127979	ind2	5.5	C/T	C	A	G	T	G/A	G	A	T/G	C	C	G	C	C	A	T	G	C	C	G/A	T	G/A	C	G	G	G	C/T	G	C	G	G/A	C	G	A	C	C	G	G	G	C	1
1	IRIS_313-10581	G/G		P PEY SIQAT::IRGC 8129-1	IRIS 313-10581	IRGC 127741	trop	1	C	T	A	G	T	G	G	A	T	C	C	A	C	C	A	T	G	C	C	G	T	G	C	G	G	G	C	A	C	G	G	C	G	A	C	C	G	G	G	C	1
1	IRIS_313-10585	G/G		UKON NISHIKI::IRGC 8314-1	IRIS 313-10585	IRGC 128494	admix	0	C	C	A	G	T	G	G	A	T	C	C	A	C	C	A	T	G	C	C	G	T	G	C	G	G	G	C	A	C	G	G	C	G	A	C	C	G	G	G	C	1
0	IRIS_313-10605	G/G		DV 86::IRGC 8840-1	IRIS 313-10605	IRGC 127348	aus	3	C	C	A	G	T	G	G	A	G	C	C	G	C	C	A	T	G	C	C	G	T	G	C	G	G	G	C	G	C	G	G	C	G	A	C	C	G	G	G	C	0
1	IRIS_313-10617	G/G		KARA SHALI::IRGC 9293-1	IRIS 313-10617	IRGC 131998	temp	3	C	C	A	G	T	G	G	A	T	C	C	G	C	C	A	T	G	C	C	G	T	G	C	G	G	G	T	G	C	G	G	C	G	A	C	C	G	G	G	C	1
0	IRIS_313-10620	G/G		R 27::IRGC 9498-1	IRIS 313-10620	IRGC 128443	trop	1	C	T	A	G	T	G	G	A	T	C	C	A	C	C	A	T	G	C	C	G	T	G	C	G	G	G	C	A	C	G	G	C	G	A	C	C	G	G	G	C	0
0	IRIS_313-10651	G/G		PHOU SAO LEUM NYANG::IRGC 11570-2	IRIS 313-10651	IRGC 128134	indx	3	C	C	A	G	T	G	G	A	G	C	C	G	C	C	A	T	G	C	C	G	T	G	C	G	G	G	C	G	C	G	G	C	G	A	C	C	G	G	G	C	0
0	IRIS_313-10657	G/G		THANGONE::IRGC 11816-1	IRIS 313-10657	IRGC 135801	subtrop	0	C	C	A	G	T	G	G	A	T	C	C	A	C	C	A	T	G	C	C	G	T	G	C	G	G	G	C	A	C	G	G	C	G	A	C	C	G	G	G	C	0
0	IRIS_313-10673	G/G		ARC 10843::IRGC 12653-1	IRIS 313-10673	IRGC 127130	aus	3	C	C	A	G	T	G	G	A	G	C	C	G	C	C	A	T	G	C	C	G	T	G	C	G	G	G	C	G	C	G	G	C	G	A	C	C	G	G	G	C	0
1	IRIS_313-10734	G/G		DEVARASI::IRGC 16173-1	IRIS 313-10734	IRGC 127315	aus	3	C	C	A	G	T	G	G	A	G	C	C	G	C	C	A	T	G	C	C	G	T	G	C	G	G	G	C	G	C	G	G	C	G	A	C	C	G	G	G	C	1
1	IRIS_313-10736	G/G		RERM BILASH::IRGC 16273-2	IRIS 313-10736	IRGC 128149	aus	3	C	C	A	G	T	G	G	A	G	C	C	G	C	C	A	T		C	C	G	T	G	C	G	G	G	C	G	C	G	G	C	G	A	C	C	G	G	G	C	1
0	IRIS_313-10738	G/A		ANDEL WELUT::IRGC 16339-1	IRIS 313-10738	IRGC 131965	admix	5.5	C	C/T	A	G	T	G	G	A	T/G	C	C/T	A/G	C	C	A	T	G	C	C	G	T	G/A	C	G	G	G/C	C	A/G	C	G	G	C/T	G/T	A	C/G	C	G/A	G	G	C	0
0	IRIS_313-10758	G/G		AEN METAN::IRGC 17142-1	IRIS 313-10758	IRGC 132386	trop	1	C	T	A	G	T	G	G	A	T	C	C	A	C	C	A	T	G	C	C	G	T	G	C	G	G	G	C	A	C	G	G	C	G	A	C	C	G	G	G	C	0
1	IRIS_313-10762	A/A		BANDI::IRGC 17214-1	IRIS 313-10762	IRGC 127207	ind3	16	C	C	G	G	T	G	G	G	G	C	C	G	C	G	A	G	A	C	C	G	T	A	T	G	G	C	C	G	C	C	G	T	T	C	G	C	G	G	G	C	1
1	IRIS_313-10767	G/G		DJANGGOT::IRGC 17491-2	IRIS 313-10767	IRGC 128032	trop	1	C	T	A	G	T	G	G	A	T	C	C	A	C	C	A	T	G	C	C	G	T	G	C	G	G	G	C	A	C	G	G	C	G	A	C	C	G	G	G	C	1
0	IRIS_313-10769	G/G		GAJA BARU::IRGC 17586-1	IRIS 313-10769	IRGC 127375	indx	3	C	C	A	G	T	G	G	A	G	C	C	G	C	C	A	T	G	C	C	G	T	G	C	G	G	G	C	G	C	G	G	C	G	A	C	C	G	G	G	C	0
0	IRIS_313-10780	G/G		KETAN LALER::IRGC 17897-1	IRIS 313-10780	IRGC 127505	trop	1	C	T	A	G	T	G	G	A	T	C	C	A	C	C	A	T	G	C	C	G	T	G	C	G	G	G	C	A	C	G	G	C	G	A	C	C	G	G	G	C	0
1	IRIS_313-10835	G/G		PERUNEL 0-69-18::IRGC 19581-1	IRIS 313-10835	IRGC 127727	ind2	4	C	C	A	G	T	G	G	A	G	C	C	G	C	C	A	T	G	G	C	G	T	G	C	G	G	G	C	G	C	G	G	C	G	A	C	C	G	G	G	C	1
0	IRIS_313-10836	G/G		VELLA PERUVAZHA 0-68-12::IRGC 19588-1	IRIS 313-10836	IRGC 127887	ind2	4	C	C	A	G	T	G	G	A	G	C	C	G	C	C	A	T	G	G	C	G	T	G	C	G	G	G	C	G	C	G	G	C	G	A	C	C	G	G	G	C	0
1	IRIS_313-10840	G/G		YE ZO::IRGC 19888-1	IRIS 313-10840	IRGC 128507	temp	0	C	C	A	G	T	G	G	A	T	C	C	A	C	C	A	T	G	C	C	G	T	G	C	G	G	G	C	A	C	G	G	C	G	A	C	C	G	G	G	C	1
1	IRIS_313-10848	G/G		ARC 6188::IRGC 20370-1	IRIS 313-10848	IRGC 131968	subtrop	2.5	C	C	A	G	T	G	G	A	T	C	C	G	C	C	A	T	G	C	C	G	T	G	C	G	G	G	T	A/G	C	G	G	C	G	A	C	C	G	G	G	C	1
0	IRIS_313-10853	G/G		ARC 10028::IRGC 20656-2	IRIS 313-10853	IRGC 132239	japx	0	C	C	A	G	T	G	G	A	T	C	C	A	C	C	A	T	G	C	C	G	T	G	C	G	G	G	C	A	C	G	G	C	G	A	C	C	G	G	G	C	0
1	IRIS_313-10854	G/G		ARC 10145::IRGC 20744-1	IRIS 313-10854	IRGC 127127	aus	3	C	C	A	G	T	G	G	A	G	C	C	G	C	C	A	T	G	C	C	G	T	G	C	G	G	G	C	G	C	G	G	C	G	A	C	C	G	G	G	C	1
0	IRIS_313-10861	G/G		ARC 11276::IRGC 21278-1	IRIS 313-10861	IRGC 127134	aus	3	C	C	A	G	T	G	G	A	G	C	C	G	C	C	A	T	G	C	C	G	T	G	C	G	G	G	C	G	C	G	G	C	G	A	C	C	G	G	G	C	0
1	IRIS_313-10862	G/G		ARC 11281::IRGC 21283-1	IRIS 313-10862	IRGC 127135	japx	0	C	C	A	G	T	G	G	A	T	C	C	A	C	C	A	T	G	C	C	G	T	G	C	G	G	G	C	A	C	G	G	C	G	A	C	C	G	G	G	C	1
1	IRIS_313-10869	G/G		ARC 11751::IRGC 21614-1	IRIS 313-10869	IRGC 127138	aus	3	C	C	A	G	T	G	G	A	G	C	C	G	C	C	A	T	G	C	C	G	T	G	C	G	G	G	C	G	C	G	G	C	G	A	C	C	G	G	G	C	1
1	IRIS_313-10875	G/G		ARC 12021::IRGC 21837-1	IRIS 313-10875	IRGC 127141	aus	3	C	C	A	G	T	G	G	A	G	C	C	G	C	C	A	T	G	C	C	G	T	G	C	G	G	G	C	G	C	G	G	C	G	A	C	C	G	G	G	C	1
0	IRIS_313-10879	G/G		ARC 12124::IRGC 21929-1	IRIS 313-10879	IRGC 127145	admix	3	C	C	A	G	T	G	G	A	G	C	C	G	C	C	A	T	G	C	C	G	T	G	C	G	G	G	C	G	C	G	G	C	G	A	C	C	G	G	G	C	0
1	IRIS_313-10883	G/G		ARC 12490::IRGC 22095-1	IRIS 313-10883	IRGC 128224	admix	3	C	C	A	G	T	G	G	A	G	C	C	G	C	C	A	T	G	C	C	G	T	G	C	G	G	G	C	G	C	G	G	C	G	A	C	C	G	G	G	C	1
0	IRIS_313-10886	G/G		ARC 12655::IRGC 22226-2	IRIS 313-10886	IRGC 132240	subtrop	1	C	C	A	G	T	G	G	A	T	C	C	A	C	C	A	T	G	C	C	G	T	G	C	G	G	G	C	A	T	G	G	C	G	A	C	C	G	G	G	C	0
0	IRIS_313-10903	NA		KHSAY VENG::IRGC 22915-1	IRIS 313-10903	IRGC 135762	ind3	10	C	C	A	G	T	G	G	A	G	C	T	G	C	C	A	T	G	C	C	G	T		C	G	G	C	C	G	C	C	G	T	T	A	G	C	A	G	G	C	0
1	IRIS_313-10931	G/G		PAKWALAN::IRGC 24156-1	IRIS 313-10931	IRGC 132025	trop	3	C	C	A	G	T	G	G	A	T	C	C	G	C	C	A	T	G	C	C	G	T	G	C	G	G	G	T	G	C	G	G	C	G	A	C	C	G	G	G	C	1
0	IRIS_313-10964	G/A		SADUMONI::IRGC 25919-1	IRIS 313-10964	IRGC 127777	aus	9	C	C	A	G	T	G	G	A	G	C	T	G	C	C	A	T	G	C	C	G	T	G/A	C	G	G	C	C	G	C	G/C	G	C/T	G/T	A	G	C	A	G	G	C	0
0	IRIS_313-10967	G/G		IAS 22-8 PALMAR::IRGC 26058-1	IRIS 313-10967	IRGC 128315	temp	0	C	C	A	G	T	G	G	A	T	C	C	A	C	C	A	T	G	C	C	G	T	G	C	G	G	G	C	A	C	G	G	C	G	A	C	C	G	G	G	C	0
1	IRIS_313-10976	G/G		LAKHSMI DIGHA::IRGC 26390-2	IRIS 313-10976	IRGC 132348	aus	3	C	C	A	G	T	G	G	A	G	C	C	G	C	C	A	T	G	C	C	G	T	G	C	G	G	G	C	G	C	G	G	C	G	A	C	C	G	G	G	C	1
0	IRIS_313-10980	G/A		DUDHSAR::IRGC 26458-1	IRIS 313-10980	IRGC 127344	admix	10.5	C	C	A	G	T	G	G	A	G	C	T	G	C	C	A	T	G	C	C	G	T	G/A	C	G	G	C	C	G	C	C	G	T	T	A	G	C	A	G	G	C	0
0	IRIS_313-10999	G/G		LANDEO::IRGC 27164-1	IRIS 313-10999	IRGC 127550	trop	1	C	T	A	G	T	G	G	A	T	C	C	A	C	C	A	T	G	C	C	G	T	G	C	G	G	G	C	A	C	G	G	C	G	A	C	C	G	G	G	C	0
0	IRIS_313-11018	G/G		MADISA::IRGC 27568-1	IRIS 313-11018	IRGC 127586	aus	3	C	C	A	G	T	G	G	A	G	C	C	G	C	C	A	T	G	C	C	G	T	G	C	G	G	G	C	G	C	G	G	C	G	A	C	C	G	G	G	C	0
0	IRIS_313-11027	G/G		JHONA 101::IRGC 27976-1	IRIS 313-11027	IRGC 127454	aus	3	C	C	A	G	T	G	G	A	G	C	C	G	C	C	A	T	G	C	C	G	T	G	C	G	G	G	C	G	C	G	G	C	G	A	C	C	G	G	G	C	0
1	IRIS_313-11034	G/G		SANTHI 206::IRGC 28215-1	IRIS 313-11034	IRGC 127786	aus	3	C	C	A	G	T	G	G	A	G	C	C	G	C	C	A	T	G	C	C	G	T	G	C	G	G	G	C	G	C	G	G	C	G	A	C	C	G	G	G	C	1
1	IRIS_313-11049	G/G		AUS 219::IRGC 29031-1	IRIS 313-11049	IRGC 127179	aus	3	C	C	A	G	T	G	G	A	G	C	C	G	C	C	A	T	G		C	G	T	G	C	G	G	G	C	G	C	G	G	C	G	A	C	C	G	G	G	C	1
1	IRIS_313-11054	G/G		AUS 295::IRGC 29083-1	IRIS 313-11054	IRGC 127184	aus	3	C	C	A	G	T	G	G	A	G	C	C	G	C	C	A	T	G	C	C	G	T	G	C	G	G	G	C	G	C	G	G	C	G	A	C	C	G	G	G	C	1
1	IRIS_313-11057	G/G		AUS 308::IRGC 29096-1	IRIS 313-11057	IRGC 127187	aus	3	C	C	A	G	T	G	G	A	G	C	C	G	C	C	A	T	G	C	C	G	T	G	C	G	G	G	C	G	C	G	G	C	G	A	C	C	G	G	G	C	1
1	IRIS_313-11061	G/G		AUS 449::IRGC 29230-1	IRIS 313-11061	IRGC 127190	aus	3	C	C	A	G	T	G	G	A	G	C	C	G	C	C	A	T	G	C	C	G	T	G	C	G	G	G	C	G	C	G	G	C	G	A	C	C	G	G	G	C	1
0	IRIS_313-11065	G/G		BORO 394::IRGC 29297-2	IRIS 313-11065	IRGC 132326	aus	3	C	C	A	G	T	G	G	A	G	C	C	G	C	C	A	T	G	C	C	G	T	G	C	G	G	G	C	G	C	G	G	C	G	A	C	C	G	G	G	C	0
0	IRIS_313-11068	G/G		PANKAIT 31::IRGC 29377-1	IRIS 313-11068	IRGC 128426	aro	3	C	C	A	G	T	G	G	A	G	C	C	G	C	C	A	T	G	C	C	G	T	G	C	G	G	G	C	G	C	G	G	C	G	A	C	C	G	G	G	C	0
0	IRIS_313-11075	G/G		KHAO NAM YEN::IRGC 29546-2	IRIS 313-11075	IRGC 128084	japx	3	C	C	A	G	T	G	G	A	T	C	C	G	C	C	A	T	G	C	C	G	T	G	C	G	G	G	T	G	C	G	G	C	G	A	C	C	G	G	G	C	0
1	IRIS_313-11076	G/G		LAI NOK KHA::IRGC 29604-2	IRIS 313-11076	IRGC 128094	ind3	3	C	C	A	G	T	G	G	A	G	C	C	G	C	C	A	T	G	C	C	G	T	G	C	G	G	G	C	G	C	G	G	C	G	A	C	C	G	G	G	C	1
0	IRIS_313-11104	G/G		D 3-102::IRGC 30972-1	IRIS 313-11104	IRGC 131978	trop	3	C	C	A	G	T	G	G	A	T	C	C	G	C	C	A	T	G	C	C	G	T	G	C	G	G	G	T	G	C	G	G	C	G	A	C	C	G	G	G	C	0
0	IRIS_313-11107	G/G		ZANTON::IRGC 31248-1	IRIS 313-11107	IRGC 132055	trop	3	C	C	A	G	T	G	G	A	T	C	C	G	C	C	A	T	G	C	C	G	T	G	C	G	G	G	T	G	C	G	G	C	G	A	C	C	G	G	G	C	0
0	IRIS_313-11113	G/G		KAL SHULI::IRGC 31665-2	IRIS 313-11113	IRGC 128069	ind2	3	C	C	A	G	T	G	G	A	G	C	C	G	C	C	A	T	G	C	C	G	T	G	C	G	G	G	C	G	C	G	G	C	G	A	C	C	G	G	G	C	0
0	IRIS_313-11124	G/A		BAZAIL 980::IRGC 32817-2	IRIS 313-11124	IRGC 127991	admix	9.5	C	C	G	G	C	G/A	G	A	G	C/G	C	G	C	C	A/G	T	A	C	C	G	T/G	G/A	C	G	G	G/C	C	G	C	G	G	C	G	A	C	C	G	G	G	C/G	0
0	IRIS_313-11127	G/G		BUBAW::IRGC 32989-2	IRIS 313-11127	IRGC 132307	subtrop	0	C	C	A	G	T	G	G	A	T	C	C	A	C	C	A	T	G	C	C	G	T	G	C	G	G	G	C	A	C	G	G	C	G	A	C	C	G	G	G	C	0
1	IRIS_313-11148	G/G		YEBAW::IRGC 33875-2	IRIS 313-11148	IRGC 128203	ind3	4	C	C	A	G	T	G	G	A	G	C	C	G	T	C	A	T	G	C	C	G	T	G	C	G	G	G	C	G	C	G	G	C	G	A	C	C	G	G	G	C	1
0	IRIS_313-11159	G/G		HYB 5-2-1-1-4::IRGC 34283-2	IRIS 313-11159	IRGC 132251	trop	2	C	C	A	G	T	G	G	A	T	C	C	G	C	C	A	T	G	C	C	G	T	G	C	G	G	G		G	C	G	G	C	G	A	C	C	G	G	G	C	0
0	IRIS_313-11162	NA		SABRAN::IRGC 34630-1	IRIS 313-11162	IRGC 127775	ind1B	10	C	C	A	G	T	G	G	A	G	C	T	G	C	C	A	T	G	C	C	G	T		C	G	G	C	C	G	C	C	G	T	T	A	G	C	A	G	G	C	0
1	IRIS_313-11163	G/G		NATEL BORO::IRGC 34749-1	IRIS 313-11163	IRGC 127652	aus	3	C	C	A	G	T	G	G	A	G	C	C	G	C	C	A	T	G	C	C	G	T	G	C	G	G	G	C	G	C	G	G	C	G	A	C	C	G	G	G	C	1
1	IRIS_313-11171	G/G		M 142::IRGC 35054-1	IRIS 313-11171	IRGC 127583	aus	3	C	C	A	G	T	G	G	A	G	C	C	G	C	C	A	T	G	C	C	G	T	G	C	G	G	G	C	G	C	G	G	C	G	A	C	C	G	G	G	C	1
1	IRIS_313-11174	G/G		SLO 19::IRGC 35157-1	IRIS 313-11174	IRGC 127817	aus	3	C	C	A	G	T	G	G	A	G	C	C	G	C	C	A	T	G	C	C	G	T	G	C	G	G	G	C	G	C	G	G	C	G	A	C	C	G	G	G	C	1
1	IRIS_313-11175	G/G		SONA AUS::IRGC 35160-1	IRIS 313-11175	IRGC 127821	aus	3	C	C	A	G	T	G	G	A	G	C	C	G	C	C	A	T	G	C	C	G	T	G	C	G	G	G	C	G	C	G	G	C	G	A	C	C	G	G	G	C	1
0	IRIS_313-11195	G/G		KHAW KAR 13::IRGC 36711-1	IRIS 313-11195	IRGC 128344	subtrop	1	C	C	A	G	T	G	G	A	T	C	C	A	C	C	A	T	G	C	C	G	T	G	C	G	G	G	C	A	T	G	G	C	G	A	C	C	G	G	G	C	0
1	IRIS_313-11205	G/G		KAZALSAIL::IRGC 37161-2	IRIS 313-11205	IRGC 128075	ind2	3	C	C	A	G	T	G	G	A	G	C	C	G	C	C	A	T	G	C	C	G	T	G	C	G	G	G	C	G	C	G	G	C	G	A	C	C	G	G	G	C	1
0	IRIS_313-11207	G/G		PAIRJAT::IRGC 37252-2	IRIS 313-11207	IRGC 128126	ind2	3	C	C	A	G	T	G	G	A	G	C	C	G	C	C	A	T	G	C	C	G	T	G	C	G	G	G	C	G	C	G	G	C	G	A	C	C	G	G	G	C	0
1	IRIS_313-11212	G/G		KALOBONA::IRGC 37478-2	IRIS 313-11212	IRGC 132309	ind2	3	C	C	A	G	T	G	G	A	G	C	C	G	C	C	A	T	G	C	C	G	T	G	C	G	G	G	C	G	C	G	G	C	G	A	C	C	G	G	G	C	1
0	IRIS_313-11216	G/G		KHAMA 1183::IRGC 37685-2	IRIS 313-11216	IRGC 128082	aus	3	C	C	A	G	T	G	G	A	G	C	C	G	C	C	A	T	G	C	C	G	T	G	C	G	G	G	C	G	C	G	G	C	G	A	C	C	G	G	G	C	0
0	IRIS_313-11218	G/G		BADSHABHOG 4-60::IRGC 37793-2	IRIS 313-11218	IRGC 127982	aro	3	C	C	A	G	T	G	G	A	T	C	C	G	C	C	A	T	G	C	C	G	T	G	C	G	G	G	T	G	C	G	G	C	G	A	C	C	G	G	G	C	0
0	IRIS_313-11219	G/G		BLACK 28-564::IRGC 37815-2	IRIS 313-11219	IRGC 127998	ind2	3	C	C	A	G	T	G	G	A	G	C	C	G	C	C	A	T	G	C	C	G	T	G	C	G	G	G	C	G	C	G	G	C	G	A	C	C	G	G	G	C	0
0	IRIS_313-11225	G/G		SADAJIRA (DEEP STRAW) 16-194::IRGC 38251-2	IRIS 313-11225	IRGC 132265	indx	2.5	C	C	A	G	T	G	G	A	T/G	C	C	G	C	C	A	T	G	C	C	G	T	G	C	G	G	G	C	G	C	G	G	C	G	A	C	C	G	G	G	C	0
0	IRIS_313-11226	G/G		SADAJIRA 19-258::IRGC 38293-2	IRIS 313-11226	IRGC 128153	ind2	3	C	C	A	G	T	G	G	A	G	C	C	G	C	C	A	T	G	C	C	G	T	G	C	G	G	G	C	G	C	G	G	C	G	A	C	C	G	G	G	C	0
0	IRIS_313-11237	G/G		TAICHUNG SEN YU 214::IRGC 38899-1	IRIS 313-11237	IRGC 127835	ind1B	4	C	C	A	G	T	G	G	A	G	C	C	G	C	C	A	T	G	G	C	G	T	G	C	G	G	G	C	G	C	G	G	C	G	A	C	C	G	G	G	C	0
0	IRIS_313-11242	G/G		OR 117-8::IRGC 39680-2	IRIS 313-11242	IRGC 128121	ind2	4	C	C	A	G	T	G	G	A	G	C	C	G	C	C	A	T	G	G	C	G	T	G	C	G	G	G	C	G	C	G	G	C	G	A	C	C	G	G	G	C	0
0	IRIS_313-11243	G/G		RATNAGIRI 45-2::IRGC 39709-1	IRIS 313-11243	IRGC 127765	admix	3	C	C	A	G	T	G	G	A	G	C	C	G	C	C	A	T	G	C	C	G	T	G	C	G	G	G	C	G	C	G	G	C	G	A	C	C	G	G	G	C	0
0	IRIS_313-11249	G/G		IR 4535-PP 23-6-8-1::IRGC 40402-2	IRIS 313-11249	IRGC 132341	indx	4	C	C	A	G	T	G	G	A	G	C	C	G	C	C	A	T	G	G	C	G	T	G	C	G	G	G	C	G	C	G	G	C	G	A	C	C	G	G	G	C	0
0	IRIS_313-11259	G/G		ARC 13515::IRGC 41134-2	IRIS 313-11259	IRGC 127949	aro	1	C	C	A	G	T	G	G	A	T	C	C		C	C	A	T	G	C	C	G	T	G	C	G	G	G		G	C	G	G	C	G	A	C	C	G	G	G	C	0
0	IRIS_313-11268	G/G		ARC 14398::IRGC 41544-2	IRIS 313-11268	IRGC 127957	aro	3	C	C	A	G	T	G	G	A	T	C	C	G	C	C	A	T	G	C	C	G	T	G	C	G	G	G	T	G	C	G	G	C	G	A	C	C	G	G	G	C	0
0	IRIS_313-11270	G/G		ARC 14663::IRGC 41671-2	IRIS 313-11270	IRGC 127959	aro	2.5	C	C	A	G	T	G	G	A		C	C	G	C	C	A	T	G	C	C	G	T	G	C	G	G	G	C/T	G	C	G	G	C	G	A	C	C	G	G	G	C	0
0	IRIS_313-11273	G/G		ARC 14860::IRGC 41793-2	IRIS 313-11273	IRGC 127962	indx	3	C	C	A	G	T	G	G	A	G	C	C	G	C	C	A	T	G	C	C	G	T	G	C	G	G	G	C	G	C	G	G	C	G	A	C	C	G	G	G	C	0
0	IRIS_313-11288	G/G		ARC 18434::IRGC 42429-2	IRIS 313-11288	IRGC 127970	indx	4	C	C	A	G	T	G	G	A	G	C	C	G	C	C	A	T	G	G	C	G	T	G	C	G	G	G	C	G	C	G	G	C	G	A	C	C	G	G	G	C	0
0	IRIS_313-11293	G/G		ARC 10975::IRGC 42611-2	IRIS 313-11293	IRGC 127934	aro	3	C	C	A	G	T	G	G	A	T	C	C	G	C	C	A	T	G	C	C	G	T	G	C	G	G	G	T	G	C	G	G	C	G	A	C	C	G	G	G	C	0
0	IRIS_313-11300	G/G		ARC 14709::IRGC 42976-2	IRIS 313-11300	IRGC 127960	ind2	3	C	C	A	G	T	G	G	A	G	C	C	G	C	C	A	T	G	C	C	G	T	G	C	G	G	G	C	G	C	G	G	C	G	A	C	C	G	G	G	C	0
1	IRIS_313-11329	G/G		PADI JALAI BELA::IRGC 44084-1	IRIS 313-11329	IRGC 127701	trop	2	C	C/T	A	G	T	G	G	A	T	C	C	A/G	C	C	A	T	G	C	C	G	T	G	C	G	G	G	C/T	A/G	C	G	G	C	G	A	C	C	G	G	G	C	1
1	IRIS_313-11336	G/G		IREQUIN::IRGC 44476-2	IRIS 313-11336	IRGC 128519	temp	3	C	C	A	G	T	G	G	A	T	C	C	G	C	C	A	T	G	C	C	G	T	G	C	G	G	G	T	G	C	G	G	C	G	A	C	C	G	G	G	C	1
1	IRIS_313-11348	G/G		AUS PADDY (RED)::IRGC 44978-1	IRIS 313-11348	IRGC 127192	aus	3	C	C	A	G	T	G	G	A	G	C	C	G		C	A	T	G	C	C	G	T	G	C	G	G	G	C	G	C	G	G	C	G	A	C	C	G	G	G	C	1
0	IRIS_313-11349	G/G		BACHHAIKALMA::IRGC 45003-2	IRIS 313-11349	IRGC 127980	ind2	3	C	C	A	G	T	G	G	A	G	C	C	G	C	C	A	T	G	C	C	G	T	G	C	G	G	G	C	G	C	G	G	C	G	A	C	C	G	G	G	C	0
1	IRIS_313-11363	G/G		KHEJURTHUPI::IRGC 46137-2	IRIS 313-11363	IRGC 128089	ind2	4	C	C	A	G	T	G	G	A	G	C	C	G	C	C	A	T	G	G	C	G	T	G	C	G	G	G	C	G	C	G	G	C	G	A	C	C	G	G	G	C	1
1	IRIS_313-11368	G/G		PANIKELASH::IRGC 46500-2	IRIS 313-11368	IRGC 128128	ind2	3	C	C	A	G	T	G	G	A	G	C	C	G	C	C	A	T	G	C	C	G	T	G	C	G	G	G	C	G	C	G	G	C	G	A	C	C	G	G	G	C	1
0	IRIS_313-11374	G/G		W 398::IRGC 46787-1	IRIS 313-11374	IRGC 127889	aus	3	C	C	A	G	T	G	G	A	G	C	C	G	C	C	A	T	G	C	C	G	T	G	C	G	G	G	C	G	C	G	G	C	G	A	C	C	G	G	G	C	0
1	IRIS_313-11401	G/G		MOTANGA::IRGC 49242-2	IRIS 313-11401	IRGC 128113	aro	3	C	C	A	G	T	G	G	A	T	C	C	G	C	C	A	T	G	C	C	G	T	G	C	G	G	G	T	G	C	G	G	C	G	A	C	C	G	G	G	C	1
0	IRIS_313-11413	G/G		KALAR KAR::IRGC 49737-2	IRIS 313-11413	IRGC 132420	aus	2	C	C	A	G	T	G	G	A	T	C	C	G	C	C	A	T	G	C	C	G	T	G	C	G	G	G	C	G	C	G	G	C	G	A	C	C	G	G	G	C	0
0	IRIS_313-11426	G/G		CHATAO::IRGC 50456-1	IRIS 313-11426	IRGC 128260	trop	3	C	C	A	G	T	G	G	A	T	C	C	G	C	C	A	T	G	C	C	G	T	G	C	G	G	G	T	G	C	G	G	C	G	A	C	C	G	G	G	C	0
0	IRIS_313-11428	G/G		MARANHAO BRANCO::IRGC 50503-1	IRIS 313-11428	IRGC 128382	trop	1	C	T	A	G	T	G	G	A	T	C	C	A	C	C	A	T	G	C	C	G	T	G	C	G	G	G	C	A	C	G	G	C	G	A	C	C	G	G	G	C	0
0	IRIS_313-11434	G/G		FORTUNA BLANCO (SAN MARCOS)::IRGC 50764-1	IRIS 313-11434	IRGC 127370	trop	3	C	C	A	G	T	G	G	A	T	C	C	G	C	C	A	T	G	C	C	G	T	G	C	G	G	G	T	G	C	G	G	C	G	A	C	C	G	G	G	C	0
0	IRIS_313-11436	G/G		SAKAZELE (538)::IRGC 50880-1	IRIS 313-11436	IRGC 127779	trop	3	C	C	A	G	T	G	G	A	T	C	C	G	C	C	A	T	G	C	C	G	T	G	C	G	G	G	T	G	C	G	G	C	G	A	C	C	G	G	G	C	0
1	IRIS_313-11439	G/G		NIRA PRIETO::IRGC 51145-1	IRIS 313-11439	IRGC 127680	trop	1	C	T	A	G	T	G	G	A	T	C	C	A	C	C	A	T	G	C	C	G	T	G	C	G	G	G	C	A	C	G	G	C	G	A	C	C	G	G	G	C	1
1	IRIS_313-11448	G/G		BARAMANJ::IRGC 52067-1	IRIS 313-11448	IRGC 127209	ind2	4	C	C	A	G	T	G	G	A	G	C	C	G	C	C	A	T	G	G	C	G	T	G	C	G	G	G	C	G	C	G	G	C	G	A	C	C	G	G	G	C	1
1	IRIS_313-11454	G/G		BARI SUTAR::IRGC 52410-1	IRIS 313-11454	IRGC 127211	aus	3	C	C	A	G	T	G	G	A	G	C	C	G	C	C	A	T	G	C	C	G	T	G	C	G	G	G	C	G	C	G	G	C	G	A	C	C	G	G	G	C	1
1	IRIS_313-11456	G/G		KOLAMBA::IRGC 52456-1	IRIS 313-11456	IRGC 127528	aus	3	C	C	A	G	T	G	G	A	G	C	C	G	C	C	A	T	G	C	C	G	T	G	C	G	G	G	C	G	C	G	G	C	G	A	C	C	G	G	G	C	1
0	IRIS_313-11462	G/G		SALSI::IRGC 52833-1	IRIS 313-11462	IRGC 127780	aus	3	C	C	A	G	T	G	G	A	G	C		G	C	C	A	T	G	C	C	G	T	G	C	G	G	G	C	G	C	G	G	C	G	A	C	C	G	G	G	C	0
0	IRIS_313-11479	G/G		VANKALI::IRGC 53339-1	IRIS 313-11479	IRGC 127882	trop	1	C	T	A	G	T	G	G	A	T	C	C	A	C	C	A	T	G	C	C	G	T	G	C	G	G	G	C	A	C	G	G	C	G	A	C	C		G	G	C	0
0	IRIS_313-11482	G/G		BONGEZA::IRGC 53483-1	IRIS 313-11482	IRGC 127234	aus	3	C	C	A	G	T	G	G	A	G	C		G	C	C	A	T	G	C	C	G	T	G	C	G	G	G	C	G	C	G	G	C	G	A	C	C	G	G	G	C	0
0	IRIS_313-11489	G/G		KALU T 139::IRGC 53670-1	IRIS 313-11489	IRGC 127482	aus	3	C	C	A	G	T	G	G	A	G	C	C	G	C	C	A	T	G	C	C	G	T	G	C	G	G	G	C	G	C	G	G	C	G	A	C	C	G	G	G	C	0
0	IRIS_313-11494	G/G		IC 25690::IRGC 53973-1	IRIS 313-11494	IRGC 128317	subtrop	0	C	C	A	G	T	G	G	A	T	C	C	A	C	C	A	T	G	C	C	G	T	G	C	G	G	G	C	A	C	G	G	C	G	A	C	C	G	G	G	C	0
0	IRIS_313-11524	G/G		KOUINONEPOU::IRGC 56663-1	IRIS 313-11524	IRGC 132405	trop	3	C	C	A	G	T	G	G	A	T	C	C	G	C	C	A	T	G	C	C	G	T	G	C	G	G	G	T	G	C	G	G	C	G	A	C	C	G	G	G	C	0
0	IRIS_313-11526	G/G		FOSSA (GBE)::IRGC 56767-1	IRIS 313-11526	IRGC 128292	trop	3	C	C	A	G	T	G	G	A	T	C	C	G	C	C	A	T	G	C	C	G	T	G	C	G	G	G	T	G	C	G	G	C	G	A	C	C	G	G	G	C	0
1	IRIS_313-11532	G/G		MARIA GAKIT::IRGC 57070-1	IRIS 313-11532	IRGC 132016	trop	1		T	A	G	T	G	G	A		C	C	A	C	C	A	T	G	C	C	G	T	G	C	G	G	G	C	A	C	G	G	C	G	A	C	C	G	G	G	C	1
0	IRIS_313-11540	G/G		PATIE ROUGE::IRGC 57686-1	IRIS 313-11540	IRGC 128428	trop	3	C	C	A	G	T	G	G	A	T	C	C	G	C	C	A	T	G	C	C	G	T	G	C	G	G	G	T	G	C	G	G	C	G	A	C	C	G	G	G	C	0
1	IRIS_313-11571	G/G		BAI MANG AI ZHONG::IRGC 59408-1	IRIS 313-11571	IRGC 128235	temp	3	C	C	A	G	T	G	G	A	T	C	C	G	C	C	A	T	G	C	C	G	T	G	C	G	G	G	T	G	C	G	G	C	G	A	C	C	G	G	G	C	1
1	IRIS_313-11574	G/G		HEI TOU HONG::IRGC 59595-1	IRIS 313-11574	IRGC 128307	temp	0	C	C	A	G	T	G	G	A	T	C	C	A	C	C	A	T	G	C	C	G	T	G	C	G	G	G	C	A	C	G	G	C	G	A	C	C	G	G	G	C	1
0	IRIS_313-11595	G/G		AMAKOYALI::IRGC 60878-1	IRIS 313-11595	IRGC 128213	aus	3	C	C	A	G	T	G	G	A	G	C	C	G	C	C	A	T	G	C	C	G	T	G	C	G	G	G	C	G	C	G	G	C	G	A	C	C	G	G	G	C	0
1	IRIS_313-11600	G/G		KOTODESHI::IRGC 60982-1	IRIS 313-11600	IRGC 128353	ind2	3	C	C	A	G	T	G	G	A	G	C	C	G	C	C	A	T	G	C	C	G	T	G	C	G	G	G	C	G	C	G	G	C	G	A	C	C	G	G	G	C	1
0	IRIS_313-11618	G/G		UPRH 58::IRGC 61525-1	IRIS 313-11618	IRGC 127879	aus	3	C	C	A	G	T	G	G	A	G	C	C	G	C	C	A	T	G	C	C	G	T	G	C	G	G	G	C	G	C	G	G	C	G	A	C	C	G	G	G	C	0
0	IRIS_313-11626	G/G		GUDURA::IRGC 61955-1	IRIS 313-11626	IRGC 127395	aro	3	C	C	A	G	T	G	G	A	G	C	C	G	C	C	A	T	G	C	C	G	T	G	C	G	G	G	C	G	C	G	G	C	G	A	C	C	G	G	G	C	0
0	IRIS_313-11629	G/G		LATIJHABAR::IRGC 61991-1	IRIS 313-11629	IRGC 127554	aus	3	C	C	A	G	T	G	G	A	G	C	C	G	C	C	A	T	G	C	C	G		G	C	G	G	G	C	G	C	G	G	C	G	A	C	C	G	G	G	C	0
1	IRIS_313-11652	G/G		GONG SHE 9::IRGC 62693-1	IRIS 313-11652	IRGC 128303	temp	0	C	C	A	G	T	G	G	A	T	C	C	A	C	C	A	T	G	C	C	G	T	G	C	G	G	G	C	A	C	G	G	C	G	A	C	C	G	G	G	C	1
1	IRIS_313-11653	G/G		MA SHE 8::IRGC 62750-1	IRIS 313-11653	IRGC 128384	temp	0	C	C	A	G	T	G	G	A	T	C	C	A	C	C	A	T	G	C	C	G	T	G	C	G	G	G	C	A	C	G	G	C	G	A	C	C	G	G	G	C	1
0	IRIS_313-11659	G/G		TOBOHUN::IRGC 63433-1	IRIS 313-11659	IRGC 132047	trop	3	C	C	A	G	T	G	G	A	T	C	C	G	C	C	A	T	G	C	C	G	T	G	C	G	G	G	T	G	C	G	G	C	G	A	C	C	G	G	G	C	0
1	IRIS_313-11690	G/G		KOCHUM::IRGC 64906-1	IRIS 313-11690	IRGC 132005	admix	0	C	C	A	G	T	G	G	A	T	C	C	A	C	C	A	T	G	C	C	G	T	G	C	G	G	G	C	A	C	G	G	C	G	A	C	C	G	G	G	C	1
0	IRIS_313-11691	G/G		SHANGYIPA::IRGC 64928-1	IRIS 313-11691	IRGC 128467	subtrop	0	C	C	A	G	T	G	G	A	T	C	C	A	C	C	A	T	G	C	C	G	T	G	C	G	G	G	C	A	C	G	G	C	G	A	C	C	G	G	G	C	0
0	IRIS_313-11713	G/G		ITA 245::IRGC 66288-1	IRIS 313-11713	IRGC 127445	ind3	4	C	C	A	G	T	G	G	A	G	C	C	G	T	C	A	T	G	C	C	G	T	G	C	G	G	G	C	G	C	G	G	C	G	A	C	C	G	G	G	C	0
0	IRIS_313-11716	G/G		SOSSOKA::IRGC 66478-1	IRIS 313-11716	IRGC 127822	ind3	3	C	C	A	G	T	G	G	A	G	C	C	G	C	C	A	T	G	C	C	G	T	G	C	G	G	G	C	G	C	G	G	C	G	A	C	C	G	G	G	C	0
0	IRIS_313-11720	G/G		DAW 85::IRGC 66704-1	IRIS 313-11720	IRGC 127302	ind3	3	C	C	A	G	T	G	G	A	G	C	C	G	C	C	A	T	G	C	C	G	T	G	C	G	G	G	C	G	C	G	G	C	G	A	C	C	G	G	G	C	0
1	IRIS_313-11738	G/G		PAUNDRI::IRGC 67527-1	IRIS 313-11738	IRGC 127720	ind2	4	C	C	A	G	T	G	G	A	G	C	C	G	C	C	A	T	G	G	C	G	T	G	C	G	G	G	C	G	C	G	G	C	G	A	C	C	G	G	G	C	1
0	IRIS_313-11739	G/G		NAKPUI::IRGC 67594-1	IRIS 313-11739	IRGC 128398	trop	3	C	C	A	G	T	G	G	A	T	C	C	G	C	C	A	T	G	C	C	G	T	G	C	G	G	G	T	G	C	G	G	C	G	A	C	C	G	G	G	C	0
0	IRIS_313-11743	G/G		CHHOTI MASHINO::IRGC 67830-1	IRIS 313-11743	IRGC 127272	aro	3	C	C	A	G	T	G	G	A	T	C	C	G	C	C	A	T	G	C	C	G	T	G	C	G	G	G	T	G	C	G	G	C	G	A	C	C	G	G	G	C	0
0	IRIS_313-11745	G/G		AN FU ZHAN::IRGC 67878-1	IRIS 313-11745	IRGC 127123	ind1A	3	C	C	A	G	T	G	G	A	G	C	C	G	C	C	A	T	G	C	C	G	T	G	C	G	G	G	C	G	C	G	G	C	G	A	C	C	G	G	G	C	0
0	IRIS_313-11779	G/G		KATUMANI::IRGC 69695-1	IRIS 313-11779	IRGC 127500	ind3	3	C	C	A	G	T	G	G	A	G	C	C	G	C	C	A	T	G	C	C	G	T	G	C	G	G	G	C	G	C	G	G	C	G	A	C	C	G	G	G	C	0
0	IRIS_313-11780	G/G		KILOMBERO::IRGC 69698-1	IRIS 313-11780	IRGC 127524	ind3	3	C	C	A	G	T	G	G	A	G	C	C	G	C	C	A	T	G	C	C	G	T	G	C	G	G	G	C	G	C	G	G	C	G	A	C	C	G	G	G	C	0
0	IRIS_313-11783	G/G		MAMA TABALI::IRGC 69720-1	IRIS 313-11783	IRGC 132015	indx	2.5	C	C	A	G	T	G	G	A	T/G	C	C	G	C	C	A	T	G	C	C	G	T	G	C	G	G	G	C	G	C	G	G	C	G	A	C	C	G	G	G	C	0
1	IRIS_313-11788	G/G		CANLUBANG::IRGC 69816-1	IRIS 313-11788	IRGC 127247	japx	3	C	C	A	G	T	G	G	A	T	C	C	G	C	C	A	T	G	C	C	G	T	G	C	G	G	G	T	G	C	G	G	C	G	A	C	C	G	G	G	C	1
0	IRIS_313-11790	G/G		VARIRANGAHY::IRGC 69897-1	IRIS 313-11790	IRGC 127883	trop	1	C	T	A	G	T	G	G	A	T	C	C	A	C	C	A	T	G	C	C	G	T	G	C	G	G	G	C	A	C	G	G	C	G	A	C	C	G	G	G	C	0
0	IRIS_313-11802	G/G		JIE CAO ZHAN::IRGC 70305-1	IRIS 313-11802	IRGC 127460	ind1A	3	C	C	A	G	T	G	G	A	G	C	C	G	C	C	A	T	G	C	C	G	T	G	C	G	G	G	C	G	C	G	G	C	G	A	C	C	G	G	G	C	0
1	IRIS_313-11803	G/G		MAO ZHA NUO::IRGC 70335-1	IRIS 313-11803	IRGC 127608	temp	0	C	C	A	G	T	G	G	A	T	C	C	A	C	C	A	T	G	C	C	G	T	G	C	G	G	G	C	A	C	G	G	C	G	A	C	C	G	G	G	C	1
0	IRIS_313-11805	G/G		XI HONG GU::IRGC 70416-1	IRIS 313-11805	IRGC 127895	ind1A	3	C	C	A	G	T	G	G	A	G	C	C	G	C	C	A	T	G	C	C	G	T	G	C	G	G	G	C	G	C	G	G	C	G	A	C	C	G	G	G	C	0
1	IRIS_313-11806	G/G		78 XUAN WU::IRGC 70475-1	IRIS 313-11806	IRGC 127101	ind1A	3	C	C	A	G	T	G	G	A	G	C	C	G	C	C	A	T	G	C	C	G	T	G	C	G	G	G	C	G	C	G	G	C	G	A	C	C	G	G	G	C	1
0	IRIS_313-11807	G/G		R 582::IRGC 70504-1	IRIS 313-11807	IRGC 127757	indx	4	C	C	A	G	T	G	G	A	G	C	C	G	C	C	A	T	G	G	C	G	T	G	C	G	G	G	C	G	C	G	G	C	G	A	C	C	G	G	G	C	0
0	IRIS_313-11808	G/G		R 762::IRGC 70531-1	IRIS 313-11808	IRGC 128444	indx	3.5	C	C	A	G	T	G	G	A	T/G	C	C	G	C	C	A	T	G	G	C	G	T	G	C	G	G	G	C	G	C	G	G	C	G	A	C	C	G	G	G	C	0
0	IRIS_313-11809	G/G		MHARAKA::IRGC 70612-1	IRIS 313-11809	IRGC 128387	aus	3	C	C	A	G	T	G	G	A	G	C	C	G	C	C	A	T	G	C	C	G	T	G	C	G	G	G	C	G	C	G	G	C	G	A	C	C	G	G	G	C	0
1	IRIS_313-11812	G/G		ASFALA::IRGC 70650-1	IRIS 313-11812	IRGC 127175	ind3	3	C	C	A	G	T	G	G	A	G	C	C	G	C	C	A	T	G	C	C	G	T	G	C	G	G	G	C	G	C	G	G	C	G	A	C	C	G	G	G	C	1
0	IRIS_313-11814	G/G		KIKUBA::IRGC 70722-1	IRIS 313-11814	IRGC 127523	ind3	3	C	C	A	G	T	G	G	A	G	C	C	G	C	C	A	T	G	C	C	G	T	G	C	G	G	G	C	G	C	G	G	C	G	A	C	C	G	G	G	C	0
1	IRIS_313-11818	G/G		LETYONE::IRGC 70753-1	IRIS 313-11818	IRGC 128361	indx	3	C	C	A	G	T	G	G	A	G	C	C	G	C	C	A	T	G	C	C	G	T	G	C	G	G	G	C	G	C	G	G	C	G	A	C	C	G	G	G	C	1
1	IRIS_313-11821	G/G		19::IRGC 70786-1	IRIS 313-11821	IRGC 127096	ind2	4	C	C	A	G	T	G	G	A	G	C	C	G	C	C	A	T	G	G	C	G	T	G	C	G	G	G	C	G	C	G	G	C	G	A	C	C	G	G	G	C	1
1	IRIS_313-11888	G/G		KANGRI::IRGC 73104-1	IRIS 313-11888	IRGC 127488	aus	3	C	C	A	G	T	G	G	A	G	C	C	G	C	C	A	T	G	C	C	G	T	G	C	G	G	G	C	G	C	G	G	C	G	A	C	C	G	G	G	C	1
1	IRIS_313-11908	G/G		DUAN SHEN ZI::IRGC 73962-1	IRIS 313-11908	IRGC 128284	temp	3	C	C	A	G	T	G	G	A	T	C	C	G	C	C	A	T	G	C	C	G	T	G	C	G	G	G	T	G	C	G	G	C	G	A	C	C	G	G	G	C	1
0	IRIS_313-11915	G/G		IB 95::IRGC 74677-1	IRIS 313-11915	IRGC 128316	trop	3	C	C	A	G	T	G	G	A	T	C	C	G	C	C	A	T	G	C	C	G	T	G	C	G	G	G	T	G	C	G	G	C	G	A	C	C	G	G	G	C	0
1	IRIS_313-11916	G/G		MUDALIGA WEE::IRGC 74706-1	IRIS 313-11916	IRGC 128395	ind2	4	C	C	A	G	T	G	G	A	G	C	C	G	C	C	A	T	G	G	C	G	T	G	C	G	G	G	C	G	C	G	G	C	G	A	C	C	G	G	G	C	1
1	IRIS_313-11919	A/A		LAKHA KUAR::IRGC 74760-1	IRIS 313-11919	IRGC 127542	ind2	7	C	C	A	G	T	G	G	A	G	C	C	G	C	C	A	T	G	C	C	A	T	A	C	A	A	G	C	G	C	G	G	C	G	A	C	C	G	G	G	C	1
0	IRIS_313-11924	G/G		NAM JAM::IRGC 75069-1	IRIS 313-11924	IRGC 128400	subtrop	1	C	C	A	G	T	G	G	A	T	C	C	A	C	C	A	T	G	C	C	G	T	G	C	G	G	G	C	A	T	G	G	C	G	A	C	C	G	G	G	C	0
0	IRIS_313-11928	G/G		DAYRON MARANGRAS::IRGC 75209-1	IRIS 313-11928	IRGC 127307	trop	1	C	T	A	G	T	G	G	A	T	C	C	A	C	C	A	T	G	C	C	G	T	G	C	G	G	G	C	A		G	G	C	G	A	C	C	G	G	G	C	0
0	IRIS_313-11964	G/G		VUOTTA SAIL::IRGC 77306-1	IRIS 313-11964	IRGC 127888	ind2	3	C	C	A	G	T	G	G	A	G	C	C	G	C	C	A	T	G	C	C	G	T	G	C	G	G	G	C	G	C	G	G	C	G	A	C	C	G	G	G	C	0
1	IRIS_313-11974	G/G		NKUMBAN NDINGO::IRGC 77718-1	IRIS 313-11974	IRGC 135575	ind3	3	C	C	A	G	T	G	G	A	G	C	C	G	C	C	A	T	G	C	C	G	T	G	C	G	G	G	C	G	C	G	G	C	G	A	C	C	G	G	G	C	1
0	IRIS_313-12018	G/G		FRENSI GBOI::IRGC 79983-1	IRIS 313-12018	IRGC 128293	trop	3	C	C	A	G	T	G	G	A		C	C	G	C	C	A	T	G	C	C	G	T	G	C	G	G	G	T	G	C	G	G	C	G	A	C	C	G	G	G	C	0
0	IRIS_313-12029	G/G		CHAO MEO::IRGC 80273-1	IRIS 313-12029	IRGC 132278	subtrop	3	C	C	A	G	T	G	G	A	G	C	C	G	C	C	A	T	G	C	C	G	T	G	C	G	G	G	C	G	C	G	G	C	G	A	C	C	G	G	G	C	0
1	IRIS_313-12225	G/G		PA LAT NGAN::IRGC 91983-1	IRIS 313-12225	IRGC 127711	ind3	3	C	C	A	G	T	G	G	A	G	C	C	G	C	C	A	T	G	C	C	G	T	G	C	G	G	G	C	G	C	G	G	C	G	A	C	C	G	G	G	C	1
0	IRIS_313-12269	G/G		SHWEWARHNAN::IRGC 96053-1	IRIS 313-12269	IRGC 127802	indx	3	C	C	A	G	T	G	G	A	G	C	C	G	C	C	A	T	G	C	C	G	T	G	C	G	G	G	C	G	C	G	G	C	G	A	C	C	G	G	G	C	0
1	IRIS_313-12271	G/G		BATIBATIKAN::IRGC 96098-1	IRIS 313-12271	IRGC 127215	trop	1	C	T	A	G	T	G	G	A	T	C	C	A	C	C	A	T	G	C	C	G	T	G	C	G	G	G	C	A	C	G	G	C	G	A	C	C	G	G	G	C	1
0	IRIS_313-12348	G/G		LOUK NOK::IRGC 107599-1	IRIS 313-12348	IRGC 127575	subtrop	3	C	C	A	G	T	G	G	A	T	C	C	G	C	C	A	T	G	C	C	G	T	G	C	G	G	G	T	G	C	G	G	C	G	A	C	C	G	G	G	C	0
1	IRIS_313-15900	G/G		IR 07F287::G1	IRIS 313-15900	IRGC 126960	indx	3	C	C	A	G	T	G	G	A	G	C	C	G	C	C	A	T	G	C	C	G	T	G	C	G	G	G	C	G	C	G	G	C	G	A	C	C	G	G	G	C	1
1	IRIS_313-7688	G/G		IR 22::IRGC 11356-C1	IRIS 313-7688	IRGC 122091	ind1B	4	C	C	A	G	T	G	G	A	G	C	C	G	C	C	A	T	G	G	C	G	T	G	C	G	G	G	C	G	C	G	G	C	G	A	C	C	G	G	G	C	1
0	IRIS_313-7773	G/G		SEBERANG MR 77::C1	IRIS 313-7773	IRGC 124421	ind1B	3	C	C	A	G	T	G	G	A	G	C	C	G	C	C	A	T	G	C	C	G	T	G	C	G	G	G	C	G	C	G	G	C	G	A	C	C	G	G	G	C	0
0	IRIS_313-7863	G/G		CIRAD 403::GERVEX 9039-C1	IRIS 313-7863	IRGC 122014	trop	1	C	T	A	G	T	G	G	A	T	C	C	A	C	C	A	T	G	C	C	G	T	G	C	G	G	G	C	A	C	G	G	C	G	A	C	C	G	G	G	C	0
0	IRIS_313-7914	G/G		IRAT 112::C1	IRIS 313-7914	IRGC 122115	trop	3	C	C	A	G	T	G	G	A	T	C	C	G	C	C	A	T	G	C	C	G	T	G	C	G	G	G	T	G	C	G	G	C	G	A	C	C	G	G	G	C	0
0	IRIS_313-7922	G/G		IRAT 234::C1	IRIS 313-7922	IRGC 122119	trop	1	C	T	A	G	T	G	G	A	T	C	C	A	C	C	A	T	G	C	C	G	T	G	C	G	G	G	C	A	C	G	G	C	G	A	C	C	G	G	G	C	0
1	IRIS_313-8024	G/G		RIBE 253::GERVEX 54-C1	IRIS 313-8024	IRGC 122217	temp	0	C	C	A	G	T	G	G	A	T	C	C	A	C	C	A	T	G	C	C	G	T	G	C	G	G	G	C	A	C	G	G	C	G	A	C	C	G	G	G	C	1
1	IRIS_313-8031	G/G		RUBINO::GERVEX 80-C1	IRIS 313-8031	IRGC 122230	japx	3	C	C	A	G	T	G	G	A	T	C	C	G	C	C	A	T	G	C	C	G	T	G	C	G	G	G	T	G	C	G	G	C	G	A	C	C	G	G	G	C	1
1	IRIS_313-8052	G/G		SMERALDO::GERVEX 138-C1	IRIS 313-8052	IRGC 122253	temp	3	C	C	A	G	T	G	G	A	T	C	C	G	C	C	A	T	G	C	C	G	T	G	C	G	G	G	T	G	C	G	G	C	G	A	C	C	G	G	G	C	1
0	IRIS_313-8066	G/G		GHIBLI::GERVEX 187-C1	IRIS 313-8066	IRGC 122053	temp	3.5	C	C	A	G	T	G	G	A	T	C	C	G	C	C	A	T	G	C	C	G	T	G	C	G	G	G	T	G	C	G	G	C	G	A	C	C	G	G	G/T	C	0
1	IRIS_313-8115	G/G		FAMILIA 181::GERVEX 901-C1	IRIS 313-8115	IRGC 122046	japx	0	C	C	A	G	T	G	G	A	T	C	C	A	C	C	A	T	G	C	C	G	T	G	C	G	G	G	C	A	C	G	G	C	G	A	C	C	G	G	G	C	1
1	IRIS_313-8116	G/G		HAREM::GERVEX 929-C1	IRIS 313-8116	IRGC 122077	japx	0	C	C	A	G	T	G	G	A	T	C	C	A	C	C	A	T	G	C	C	G	T	G	C	G	G	G	C	A	C	G	G	C	G	A	C	C	G	G	G	C	1
1	IRIS_313-8121	G/G		MESTRE::GERVEX 1082-C1	IRIS 313-8121	IRGC 122169	japx	4	C	C	A	G	T	G	G	A	G	C	C	G	C	C	A	T	G	G	C	G	T	G	C	G	G	G	C	G	C	G	G	C	G	A	C	C	G	G	G	C	1
1	IRIS_313-8124	G/G		OTA::GERVEX 1145-C1	IRIS 313-8124	IRGC 122187	japx	0	C	C	A	G	T	G	G	A	T	C	C	A	C	C	A	T	G	C	C	G	T	G	C	G	G	G	C	A	C	G	G	C	G	A	C	C	G	G	G	C	1
1	IRIS_313-8128	G/G		PRECOZ 2 F A::GERVEX 1182-C1	IRIS 313-8128	IRGC 122208	temp	3	C	C	A	G	T	G	G	A	T	C	C	G	C	C	A	T	G	C	C	G	T	G	C	G	G	G	T	G	C	G	G	C	G	A	C	C	G	G	G	C	1
1	IRIS_313-8139	G/G		SANDOCA::GERVEX 1262-C1	IRIS 313-8139	IRGC 122240	japx	3	C	C	A	G	T	G	G	A	G	C	C	G	C	C	A	T	G			G	T	G	C	G	G	G	C	G	C	G	G	C	G	A	C	C	G	G	G	C	1
1	IRIS_313-8140	G/G		SANGHAI::GERVEX 1264-C1	IRIS 313-8140	IRGC 122241	temp	0	C	C	A	G	T	G	G	A	T	C	C	A	C	C	A	T	G	C	C	G	T	G	C	G	G	G	C	A	C	G	G	C	G	A	C	C	G	G	G	C	1
1	IRIS_313-8142	G/G		SETTANTUNO::GERVEX 1279-C1	IRIS 313-8142	IRGC 122249	temp	3	C	C	A	G	T	G	G	A	T	C	C	G	C	C	A	T	G	C	C	G	T	G	C	G	G	G	T	G	C	G	G	C	G	A	C	C	G	G	G	C	1
1	IRIS_313-8143	G/G		SLAVA::GERVEX 1287-C1	IRIS 313-8143	IRGC 122252	japx	0	C	C	A	G	T	G	G	A	T	C	C	A	C	C	A	T	G	C	C	G	T	G	C	G	G	G	C	A	C	G	G	C	G	A	C	C	G	G	G	C	1
1	IRIS_313-8145	G/G		SUPER::GERVEX 1304-C1	IRIS 313-8145	IRGC 122257	temp	0	C	C	A	G	T	G	G	A	T	C	C		C	C	A	T	G	C	C	G	T	G	C	G	G	G	C		C	G	G	C	G	A	C	C	G	G	G	C	1
1	IRIS_313-8167	G/G		DELTA::GERVEX 1519-C1	IRIS 313-8167	IRGC 122303	japx	0	C	C	A	G	T	G	G	A	T	C	C	A	C	C	A	T	G	C	C	G	T	G	C	G	G	G	C	A	C	G	G	C	G	A	C	C	G	G	G	C	1
1	IRIS_313-8170	G/G		MEJANES 2::GERVEX 1560-C1	IRIS 313-8170	IRGC 122166	japx	0	C	C	A	G	T	G	G	A	T	C	C	A	C	C	A	T	G	C	C	G	T	G	C	G	G	G	C	A	C	G	G	C	G	A	C	C	G	G	G	C	1
1	IRIS_313-8204	G/G		S 102::GERVEX 1671-C1	IRIS 313-8204	IRGC 121817	temp	0	C	C	A	G	T	G	G	A	T	C	C	A	C	C	A	T	G	C	C	G	T	G	C	G	G	G	C	A	C	G	G	C	G	A	C	C	G	G	G	C	1
1	IRIS_313-8208	G/G		LUSITO IRRADIADO 859-85-2::GERVEX 1676-C1	IRIS 313-8208	IRGC 122152	temp	4	C	C	A	G	T	G	G	A	G	C	C	G	C	C	A	T	G	G	C	G	T	G	C	G	G	G	C	G	C	G	G	C	G	A	C	C	G	G	G	C	1
1	IRIS_313-8216	G/G		ROXANI::GERVEX 1686-C1	IRIS 313-8216	IRGC 122222	temp	0	C	C	A	G	T	G	G	A	T	C	C	A	C	C	A	T	G	C	C	G	T	G	C	G	G	G		A	C	G	G	C	G	A	C	C	G	G	G	C	1
1	IRIS_313-8256	G/G		GERDEH	IRIS 313-8256	IRGC 117474	japx	0	C	C	A	G	T	G	G	A	T	C	C	A	C	C	A	T	G	C	C	G	T	G	C	G	G	G	C	A	C	G	G	C	G	A	C	C	G	G	G	C	1
1	IRIS_313-8305	G/G		URAIBOOL::IRGC 52785-1	IRIS 313-8305	IRGC 126289	ind2	4	C	C	A	G	T	G	G	A	G	C	C	G	C	C	A	T	G	G	C	G	T	G	C	G	G	G	C	G	C	G	G	C	G	A	C	C	G	G	G	C	1
0	IRIS_313-8316	G/G		RADIN PAHANG::IRGC 14487-1	IRIS 313-8316	IRGC 131948	ind3	3	C	C	A	G	T	G	G	A	G	C	C	G	C	C	A	T	G	C	C	G	T	G	C	G	G		C	G	C	G	G	C		A		C	G	G	G	C	0
1	IRIS_313-8387	G/G		FU LI HONG::IRGC 70250-1	IRIS 313-8387	IRGC 125610	temp	3	C	C	A	G	T	G	G	A	T	C	C	G	C	C	A	T	G	C	C	G	T	G	C	G	G	G	T	G	C	G	G	C	G	A	C	C	G	G	G	C	1
0	IRIS_313-8390	G/G		SUFAID 246::IRGC 28303-1	IRIS 313-8390	IRGC 121128	aus	3	C	C	A	G	T	G	G	A	G	C	C	G	C	C	A	T	G	C	C	G	T	G	C	G	G	G	C	G	C	G	G	C	G	A	C	C	G	G	G	C	0
0	IRIS_313-8392	G/G		IR 2003-P7-7-4-2::IRGC 32671-1	IRIS 313-8392	IRGC 125970	ind1B	3	C	C	A	G	T	G	G	A	G	C	C	G	C	C	A	T	G	C	C	G	T	G	C	G	G	G	C	G	C	G	G	C	G	A	C	C	G	G	G	C	0
0	IRIS_313-8523	G/G		OS 4	IRIS 313-8523	IRGC 117543	trop	1	C	T	A	G	T	G	G	A	T	C	C	A	C	C	A	T	G	C	C	G	T	G	C	G	G	G	C	A	C	G	G	C	G	A	C	C	G	G	G	C	0
0	IRIS_313-8554	G/G		ARC 11959::IRGC 21780-1	IRIS 313-8554	IRGC 121188	aus	3	C	C	A	G	T	G	G	A	G	C	C	G	C	C	A	T	G	C	C	G	T	G	C	G	G	G	C	G	C	G	G	C	G	A	C	C	G	G	G	C	0
1	IRIS_313-8599	G/G		BUE GA WA::IRGC 60824-1	IRIS 313-8599	IRGC 127041	subtrop	3	C	C	A	G	T	G	G	A	T	C	C	G	C	C	A	T	G	C	C	G	T	G	C	G	G	G	T	G	C	G	G	C	G	A	C	C	G	G	G	C	1
0	IRIS_313-8614	G/G		RAJHUSAI (ACR 12)::IRGC 53630-1	IRIS 313-8614	IRGC 126264	ind2	4	C	C	A	G	T	G	G	A	G	C	C	G	C	C	A	T	G	G	C	G	T	G	C	G	G	G	C	G	C	G	G	C	G	A	C	C	G	G	G	C	0
0	IRIS_313-8616	G/G		IR 5494 (BPH 1)::IRGC 24484-1	IRIS 313-8616	IRGC 131939	ind1B	4	C	C	A	G	T	G	G	A	G	C	C	G	C	C	A	T	G	G	C	G	T	G	C	G	G	G	C	G	C	G	G	C	G	A	C	C	G	G	G	C	0
1	IRIS_313-8690	G/G		NEP HOA VANG	IRIS 313-8690	IRGC 117537	japx	3	C	C	A	G	T	G	G	A	T	C	C	G	C	C	A	T	G	C	C	G	T	G	C	G	G	G	T	G	C	G	G	C	G	A	C	C	G	G	G	C	1
0	IRIS_313-8694	G/G		TRES MESES::IRGC 6464-1	IRIS 313-8694	IRGC 126010	trop	3	C	C	A	G	T	G	G	A	T	C	C	G	C	C	A	T	G	C	C	G	T	G	C	G	G	G	T	G	C	G	G	C	G	A	C	C	G	G	G		0
1	IRIS_313-8712	G/G		ARC 13829	IRIS 313-8712	IRGC 117426	aro	3	C	C	A	G	T	G	G	A	T	C	C	G	C	C	A	T	G	C	C	G	T	G	C	G	G	G	T	G	C	G	G	C	G	A	C	C	G	G	G	C	1
1	IRIS_313-8727	G/G		T 315::IRGC 54792-1	IRIS 313-8727	IRGC 126280	ind2	3	C	C	A	G	T	G	G	A	G	C	C	G	C	C	A	T	G	C	C	G	T	G	C	G	G	G	C	G	C	G	G	C	G	A	C	C	G	G	G	C	1
1	IRIS_313-8757	G/G		NIRGUNI::IRGC 61127-1	IRIS 313-8757	IRGC 126000	ind2	3	C	C	A	G	T	G	G	A	G	C	C	G	C	C	A	T	G	C	C	G	T	G	C	G	G	G	C	G	C	G	G	C	G	A	C	C	G	G	G	C	1
0	IRIS_313-8778	G/G		SUP BLUE ROSE::IRGC 1739-1	IRIS 313-8778	IRGC 126124	trop	3	C	C	A	G	T	G	G	A	T	C	C	G	C	C	A	T	G	C	C	G	T	G	C	G	G	G	T	G	C	G	G	C	G	A	C	C	G	G	G	C	0
0	IRIS_313-8846	G/G		BAIANG 6::IRGC 6129-1	IRIS 313-8846	IRGC 125668	indx	3	C	C	A	G	T	G	G	A	G	C	C	G	C	C	A	T	G	C	C	G	T	G	C	G	G	G	C	G	C	G	G	C	G	A	C	C	G	G	G	C	0
0	IRIS_313-8880	G/G		PAGAIYAHAN	IRIS 313-8880	IRGC 117550	indx	3	C	C	A	G	T	G	G	A	G	C	C	G	C	C	A	T	G	C	C	G	T	G	C	G	G	G	C	G	C	G	G	C	G	A	C	C	G	G	G	C	0
1	IRIS_313-8894	G/G		LEKATAN::IRGC 71554-1	IRIS 313-8894	IRGC 126070	trop	3	C	C	A	G	T	G	G	A	T	C	C	G	C	C	A	T	G	C	C	G	T	G	C	G	G	G	T	G	C	G	G	C	G	A	C	C	G	G	G	C	1
1	IRIS_313-9050	G/G		ANGKARONG::IRGC 71493-1	IRIS 313-9050	IRGC 127070	trop	1	C	T	A	G	T	G	G	A	T	C	C	A	C	C	A	T	G	C	C	G	T	G	C	G	G	G	C	A	C	G	G	C	G	A	C	C	G	G	G	C	1
0	IRIS_313-9121	G/G		KHAO LEUANG RAI::IRGC 48168-1	IRIS 313-9121	IRGC 125802	ind2	3	C	C	A	G	T	G	G	A	G	C	C	G	C	C	A	T	G	C	C	G	T	G	C	G	G	G	C	G	C	G	G	C	G	A	C	C	G	G	G	C	0
0	IRIS_313-9137	G/G		ARC 10100::IRGC 20709-1	IRIS 313-9137	IRGC 121185	aus	3	C	C	A	G	T	G	G	A	G	C	C	G	C	C	A	T	G	C	C	G	T	G	C	G	G	G		G	C	G	G	C	G	A	C	C	G	G	G	C	0
1	IRIS_313-9139	G/G		GOJOL GORIA::IRGC 26629-1	IRIS 313-9139	IRGC 125754	ind2	3	C	C	A	G	T	G	G	A	G	C	C	G	C	C	A	T	G	C	C	G	T	G	C	G	G	G	C	G	C	G	G	C	G	A	C	C	G	G	G	C	1
0	IRIS_313-9176	G/G		ARC 11359::IRGC 21348-1	IRIS 313-9176	IRGC 125639	japx	0	C	C	A	G	T	G	G	A	T	C	C	A	C	C	A	T	G	C	C	G	T	G	C	G	G	G	C	A	C	G	G	C	G	A	C	C	G	G	G	C	0
0	IRIS_313-9218	G/G		KALO CHAKOL::IRGC 77258-1	IRIS 313-9218	IRGC 126136	ind2	3	C	C	A	G	T	G	G	A	G	C	C	G	C	C	A	T	G	C	C	G	T	G	C	G	G	G	C	G	C	G	G	C	G	A	C	C	G	G	G	C	0
0	IRIS_313-9239	G/G		RIMBUN::IRGC 43741-1	IRIS 313-9239	IRGC 126268	trop	1	C	T	A	G	T	G	G	A	T	C	C	A	C	C	A	T	G	C	C	G	T	G	C	G	G	G	C	A	C	G	G	C	G	A	C	C	G	G	G	C	0
1	IRIS_313-9283	G/G		TAK SUFAID::IRGC 73127-1	IRIS 313-9283	IRGC 121134	aus	3	C	C	A	G	T	G	G	A	G	C	C	G	C	C	A	T	G	C	C	G	T	G	C	G	G	G	C	G	C	G	G	C	G	A	C	C	G	G	G	C	1
0	IRIS_313-9342	G/G		LUA CHAN HUONG::IRGC 16800-1	IRIS 313-9342	IRGC 126236	ind3	3	C	C	A	G	T	G	G	A	G	C	C	G	C	C	A	T	G	C	C	G	T	G	C	G	G	G	C	G	C	G	G	C	G	A	C	C	G	G	G	C	0
1	IRIS_313-9405	G/G		INGSA BELANAK::IRGC 43402-1	IRIS 313-9405	IRGC 126059	trop	1	C	T	A	G	T	G	G	A	T	C	C	A	C	C	A	T	G	C	C	G	T	G	C	G	G	G	C	A	C	G	G	C	G	A	C	C	G	G	G	C	1
1	IRIS_313-9438	G/G		7507-137::IRGC 40081-1	IRIS 313-9438	IRGC 121242	temp	0	C	C	A	G	T	G	G	A	T	C	C	A	C	C	A	T	G	C	C	G	T	G	C	G	G	G	C	A	C	G	G	C	G	A	C	C	G	G	G	C	1
1	IRIS_313-9449	G/G		JAMBALI::IRGC 73101-1	IRIS 313-9449	IRGC 120996	aus	3	C	C	A	G	T	G	G	A	G	C	C	G	C	C	A	T	G	C	C	G	T	G	C	G	G	G	C	G	C	G	G	C	G	A	C	C	G	G	G	C	1
0	IRIS_313-9464	G/G		SML ACORNI::IRGC 13389-1	IRIS 313-9464	IRGC 125903	admix	3	C	C	A	G	T	G	G	A	G	C	C	G	C	C	A	T	G	C	C	G	T	G	C	G	G	G	C	G	C	G	G	C	G	A	C	C	G	G	G	C	0
1	IRIS_313-9469	G/G		TSAO SHENG LI 1::IRGC 1309-1	IRIS 313-9469	IRGC 125929	ind1A	3	C	C	A	G	T	G	G	A	G	C	C	G	C	C	A	T	G	C	C	G	T	G	C	G	G	G	C	G	C	G	G	C	G	A	C	C	G	G	G	C	1
1	IRIS_313-9568	G/G		PAMPANGON (H)::IRGC 60392-1	IRIS 313-9568	IRGC 126346	trop	3	C	C	A	G	T	G	G	A	G	C	C	G	C	C	A	T	G	C	C	G	T	G	C	G	G	G	C	G	C	G	G	C	G	A	C	C	G	G	G	C	1
1	IRIS_313-9572	G/G		ASU::IRGC 62154-1	IRIS 313-9572	IRGC 125658	indx	3	C	C	A	G	T	G	G	A	G	C	C	G	C	C	A	T	G	C	C	G	T	G	C	G	G	G	C	G	C	G	G	C	G	A	C	C	G	G	G	C	1
0	IRIS_313-9629	G/G		JC 157	IRIS 313-9629	IRGC 117498	aro	3	C	C	A	G	T	G	G	A	T	C	C	G	C	C	A	T	G	C	C	G	T	G	C	G	G	G	T	G	C	G	G	C	G	A	C	C	G	G	G	C	0
1	IRIS_313-9661	G/G		LENJA MURALI::IRGC 66815-1	IRIS 313-9661	IRGC 121038	aus	3	C	C	A	G	T	G	G	A	G	C	C	G	C	C	A	T	G	C	C	G	T	G	C	G	G	G	C	G	C	G	G	C	G	A	C	C	G	G	G	C	1
0	IRIS_313-9682	G/G		TK RED 35-799::IRGC 38535-1	IRIS 313-9682	IRGC 135548	aro	3	C	C	A	G	T	G	G	A	T	C	C	G	C	C	A	T	G	C	C	G	T	G	C	G	G	G	T	G	C	G	G	C	G	A	C	C	G	G	G	C	0
1	IRIS_313-9723	G/G		AI ZI HUNG::IRGC 51255-1	IRIS 313-9723	IRGC 126129	ind1A	3	C	C	A	G	T	G	G	A	G	C	C	G	C	C	A	T	G	C	C	G	T	G	C	G	G	G	C	G	C	G		C	G	A	C	C	G	G	G	C	1
0	IRIS_313-9724	G/G		AI DA ZHONG::IRGC 59348-1	IRIS 313-9724	IRGC 121246	temp	0	C	C	A	G	T	G	G	A	T	C	C	A	C	C	A	T	G	C	C	G	T	G	C	G	G	G	C	A	C	G	G	C	G	A	C	C	G	G	G	C	0
1	IRIS_313-9790	G/G		JAPONES BALILLA::IRGC 5785-1	IRIS 313-9790	IRGC 125781	temp	0	C	C	A	G	T	G	G	A	T	C	C	A	C	C	A	T	G	C	C	G	T	G	C	G	G	G	C	A	C	G	G	C	G	A	C	C	G	G	G	C	1
0	IRIS_313-9791	G/G		LEAD::IRGC 5805-1	IRIS 313-9791	IRGC 125821	indx	3	C	C	A	G	T	G	G	A	G	C	C	G	C	C	A	T	G	C	C	G	T	G	C	G	G	G	C	G	C	G	G	C	G	A	C	C	G	G	G	C	0
0	IRIS_313-9818	G/G		C 1 6-5-2::IRGC 10669-1	IRIS 313-9818	IRGC 126147	admix	1.5	C	C/T		G	T	G	G	A/G		C	C	A/G	C	C	A	T	G	C	C	G	T	G		G	G		C		C		G	C				C	G	G	G	C	0
1	IRIS_313-9886	G/G		HUK ZO::IRGC 19760-1	IRIS 313-9886	IRGC 125767	temp	0	C	C	A	G	T	G	G	A	T	C	C	A	C	C	A	T	G	C	C	G	T	G	C	G	G	G	C	A	C	G	G	C	G	A	C	C	G	G	G	C	1
1	IRIS_313-9890	G/G		WA BANG::IRGC 19880-1	IRIS 313-9890	IRGC 125934	temp	0	C	C	A	G	T	G	G	A	T	C	C	A	C	C	A	T	G	C	C	G	T	G	C	G	G	G	C	A	C	G	G	C	G	A		C	G	G	G	C	1
1	IRIS_313-9891	G/G		YONG AN HUK::IRGC 19891-1	IRIS 313-9891	IRGC 125945	temp	3	C	C	A	G	T	G	G	A	T	C	C	G	C	C	A	T	G	C	C	G	T	G	C	G	G	G	T	G	C	G	G	C	G	A	C	C	G	G	G	C	1
1	IRIS_313-9964	G/G		WIR 1951::IRGC 51643-1	IRIS 313-9964	IRGC 125938	temp	3	C	C	A	G	T	G	G	A	T	C	C	G	C	C	A	T	G	C	C	G	T	G	C	G	G	G	T	G	C	G	G	C	G	A	C	C	G	G	G	C	1
																														6543325															6544097
																														Non-assoc	Assoc														Non-assoc	Assoc
																													G	235	0													G	239	25
																													A	2	194													A	4	166
																													G/A	6	0													G/A	2	1
																														243	194	437													245	192	437
[truncated: 865 more columns]

## Sheet: RGA4 and 5 3000 rice genomes
JAPONICA NIPPONBARE POSITIONS	ASSAY ID	ACCESSION	SUBPOPULATION	MISMATCH	6542323	6542390	6542401	6542403	6542404	6542459	6542460	6542494	6542506	6542518	6542521	6542530	6542540	6542572	6542578	6542579	6542629	6542633	6542650	6542716	6542725	6542726	6542732	6542737	6542744	6542747	6542818	6542840	6542878	6542891	6543009	6543026	6543028	6543076	6543082	6543083	6543097	6543112	6543119	6543125	6543134	6543137	6543143	6543173	6543189
JAPONICA NIPPONBARE ALLELES					C	G	G	G	C	C	A	A	C	A	G	G	T	G	T	C	G	G	A	C	T	T	C	A	G	G	C	A	T	C	C	A	T	T	G	C	C	G	A	T	T	C	T	C	A
MSU7 EFFECTS (cds-Non-synonymous/cds-Synonymous/Cds/3'UTR/5'UTR/Exon/splice Acceptor/splice Donor/Gene-intron/Promoter)					missense_variant	missense_variant	missense_variant	missense_variant	missense_variant	missense_variant	missense_variant	missense_variant	missense_variant	missense_variant	missense_variant	missense_variant	missense_variant	missense_variant	missense_variant	missense_variant	missense_variant	missense_variant	missense_variant	missense_variant	missense_variant	missense_variant	missense_variant	missense_variant	missense_variant	missense_variant	missense_variant	missense_variant	missense_variant	missense_variant	missense_variant	missense_variant	missense_variant	missense_variant	missense_variant	missense_variant	missense_variant	missense_variant	missense_variant	missense_variant	missense_variant	missense_variant	missense_variant	missense_variant	missense_variant
LOC_OS11G11790 (RGA4)
1090 accessions carry both RGA4 associated non-synonymous SNPs
SANSUIJIN::[B002]	B002	IRGC 136041	temp	11	C	G	G	G	C	C	A	A	C	A	G	G	T	G	T	C	G	G	A	C	T	G	C	A	G	G	T	G	T	C	C	A	T	T	G	C	C	G	A	T	T	C	T	C	A
ZAOSHENGBAI::[B003]	B003	IRGC 136088	japx	11	C	G	G	G	C	C	A	A	C	A	G	G	T	G	T	C	G	G	A	C	T	G	C	A	G	G	T	G	T	C	C	A	T	T	G	C	C	G	A	T	T	C	T	C	A
YIKONG::[B006]	B006	IRGC 136078	indx	12	C	G	G	G	C	C	A	A	C	A	G	G	T	G	T	C	G	G	A	C		T/G	C	A/G	G/T	G	T	G	T	C	C	A	T	T	G	C		G					T/C		A
TIANHANDAO::[B007]	B007	IRGC 136055	indx	11	C	G	G	G	C	C	A	A	C	A	G	G	T	G	T	C	G	G	A	C	T	G	C	A	G	G	T	G	T	C	C	A	T	T	G	C	C	G	A	T	T	C	T	C	A
MALAIHONG::[B010]	B010		ind1A	12	C	G	G	G	C	C	A	A	C	A	G	G	T	G	T	C	G	G	A	C	T	G	C	A	G	G	T	G	T	C	C	A	T	T	G	C	C	G	A	T	T	C	T	C	A
KAHAMU::[B015]	B015	IRGC 135963	ind1A	11	C	G	G	G	C	C	A	A	C	A	G	G	T	G	T	C	G	G	A	C	T	G	C	A	G	G	T	G	T	C	C	A	T	T	G	C	C	G	A	T	T	C	T	C	A
AOMIERTE 168::[B016]	B016	IRGC 135829	temp	11	C	G	G	G	C	C	A	A	C	A	G	G	T	G	T	C	G	G	A	C	T	G	C	A	G	G	T	G	T	C	C	A	T	T	G	C	C	G	A	T	T	C	T	C	A
BULEIDA A-75::[B019]	B019	IRGC 135852	indx	11	C	G	G	G	C	C	A	A	C	A	G	G	T	G	T	C	G	G	A	C	T	G	C	A	G	G	T	G	T	C	C	A	T	T	G	C	C	G	A	T	T	C	T	C	A
XIANLUOSICHI::[B024]	B024	IRGC 136076	ind1A	11	C	G	G	G	C	C	A	A	C	A	G	G	T	G	T	C	G	G	A	C	T	G	C	A	G	G	T	G	T	C	C	A	T	T	G	C	C	G	A	T	T	C	T	C	A
BW 293-2::[B033]	B033	IRGC 135853	ind1B	11	C	G	G	G	C	C	A	A	C	A	G	G	T	G	T	C	G	G	A	C	T	G	C	A	G	G	T	G	T	C	C	A	T	T	G	C	C	G	A	T	T	C	T	C	A
AMERICAN RICE::[B035]	B035	IRGC 135828	indx	11	C	G	G	G	C	C	A	A	C	A	G	G	T	G	T	C	G	G		C	T	G	C	A	G	G	T	G	T	C	C	A	T	T	G	C	C	G	A	T	T	C	T	C	A
JIJUCAS CLARO::[B036]	B036	IRGC 135955	japx	11	C	G	G	G	C	C	A	A	C	A	G	G	T	G	T	C	G	G	A	C	T	G	C	A	G	G	T	G	T	C	C	A	T	T	G	C	C	G	A	T	T	C	T	C	A
GONGCHENGXIANG::[B045]	B045	IRGC 135896	temp	11	C	G	G	G	C	C	A	A	C	A	G	G	T	G	T	C	G	G	A	C	T	G	C	A	G	G	T	G	T	C	C	A	T	T	G	C	C	G	A	T	T	C	T	C	A
QIUTIANXIAOTING::[B046]	B046	IRGC 136032	temp	11	C	G	G	G	C	C	A	A	C	A	G	G	T	G	T	C	G	G	A	C	T	G	C	A	G	G	T	G	T	C	C	A	T	T	G	C	C	G	A	T	T	C	T	C	A
ZHENFU 8::[B047]	B047	IRGC 136092	temp	11	C	G	G	G	C	C	A	A	C	A	G	G	T	G	T	C	G	G	A	C	T	G	C	A	G	G	T	G	T	C	C	A	T	T	G	C	C	G	A	T	T	C	T	C	A
ERJIUNAN 1::[B058]	B058		ind1B	11	C	G	G	G	C	C	A	A	C	A	G	G	T	G	T	C	G	G	A	C	T	G	C	A	G	G	T	G	T	C	C	A	T	T	G	C	C	G	A	T	T	C	T	C	A
NANJING 11::[B059]	B059		ind1A	11	C	G	G	G	C	C	A	A	C	A	G	G	T	G	T	C	G	G	A	C	T	G	C	A	G	G	T	G	T	C	C	A	T	T	G	C	C	G	A	T	T	C	T	C	A
AIJIAONANTE::[B060]	B060	IRGC 117600	ind1A	12	C	G	G	G	C	C	A	A	C	A	G	G	T	G	T	C	G	G	A	C	T	G	C	A	G	G	T	G	T	C	C	A	T	T	G	C	C	G	A	T	T	C	T	C	A
GUANGLUAI 4::[B061]	B061		ind1A	11	C	G	G	G	C	C	A	A	C	A	G	G	T	G	T	C	G	G	A	C	T	G	C	A	G	G	T	G	T	C	C	A	T	T	G	C	C	G	A	T	T	C	T	C	A
FUNINGZIPIGENGZI::[B067]	B067		ind1A	11	C	G	G	G	C	C	A	A	C	A	G	G	T	G	T	C	G	G	A	C	T	G	C	A	G	G	T	G	T	C	C	A	T	T	G	C	C	G	A	T	T	C	T	C	A
JINXIBAI2::[B073]	B073		indx	11	C	G	G	G	C	C	A	A	C	A	G	G	T	G	T	C	G	G	A	C	T	G	C	A	G	G	T	G	T	C	C	A	T	T	G	C	C	G	A	T	T	C	T	C	A
TAISHANNUO::[B074]	B074		ind1A	11	C	G	G	G	C	C	A	A	C	A	G	G	T	G	T	C	G	G	A	C	T	G	C	A	G	G	T	G	T	C	C	A	T	T	G	C	C	G	A	T	T	C	T	C	A
MINBEIWANXIAN::[B076]	B076		indx	11	C	G	G	G	C	C	A	A	C	A	G	G	T	G	T	C	G	G	A	C	T	G	C	A	G	G	T	G	T	C	C	A	T	T	G	C	C	G	A	T	T	C	T	C	A
YIZHIXIANG::[B077]	B077		temp	11	C	G	G	G	C	C	A	A	C	A	G	G	T	G	T	C	G	G	A	C	T	G	C	A	G	G	T	G	T	C	C	A	T	T	G	C	C	G	A	T	T	C	T	C	A
ESINIU::[B079]	B079	IRGC 135887	ind1A	11	C	G	G	G	C	C	A	A	C	A	G	G	T	G	T	C	G	G	A	C	T	G	C	A	G	G	T	G	T	C	C	A	T	T	G	C	C	G	A	T	T	C	T	C	A
HEIDU 4::[B081]	B081	IRGC 135901	ind1A	11	C	G	G	G	C	C	A	A	C	A	G	G	T	G	T	C	G	G	A	C	T	G	C	A	G	G	T	G	T	C	C	A	T	T	G	C	C	G	A	T	T	C	T	C	A
DONGTINGWANXIAN::[B083]	B083		ind1A	12	C	G	G	G	C	C	A	A	C	A	G	G	T	G	T	C	G	G	A	C	T	G	C	A	G	G	T	G	T	C	C	A	T	T	G	C	C	G	A	T	T	C	T	C	A
BAWANGBIAN 1::[B084]	B084		admix	11	C	G	G	G	C	C	A	A	C	A	G	G	T	G	T	C	G	G	A	C	T	G	C	A	G	G	T	G	T	C	C	A	T	T	G	C	C	G	A	T	T	C	T	C	A
SAN**QISHILUO::[B088]	B088		indx	11	C	G	G	G	C	C	A	A	C	A	G	G	T	G	T	C	G	G	A	C	T	G	C	A	G	G	T	G	T	C	C	A	T	T	G	C	C	G	A	T	T	C	T	C	A
ZIMI::[B090]	B090		indx	12	C	G	G	G	C	C	A	A	C	A	G	G	T	G	T	C	G	G	A	C	T	G	C	A	G	G	T	G	T	C	C	A	T	T	G	C	C	G	A	T	T	C	T	C	A
GONGJU 73::[B092]	B092		ind1A	11	C	G	G	G	C	C	A	A	C	A	G	G	T	G	T	C	G	G	A	C	T	G	C	A	G	G	T	G	T	C	C	A	T	T	G	C	C	G	A	T	T	C	T	C	A
ZINUO::[B094]	B094		ind1A	12	C	G	G	G	C	C	A	A	C	A	G	G	T	G	T	C	G	G	A	C	T	G	C	A	G	G	T	G	T	C	C	A	T	T	G	C	C	G	A	T	T	C	T	C	A
MOWANGGUNEIZA::[B095]	B095		indx	11	C	G	G	G	C	C	A	A	C	A	G	G	T	G	T	C	G	G	A	C	T	G	C	A	G	G	T	G	T	C	C	A	T	T	G	C	C	G	A	T	T	C	T	C	A
JIABALA::[B104]	B104		ind1A	11	C	G	G	G	C	C	A	A	C	A	G	G	T	G	T	C	G	G	A	C	T	G	C	A	G	G	T	G	T	C	C	A	T	T	G	C	C	G	A	T	T	C	T	C	A
BAOXUAN 21 A::[B105]	B105		indx	11	C	G	G	G	C	C	A	A	C	A	G	G	T	G	T	C	G	G	A	C	T	G	C	A	G	G	T	G	T	C	C	A	T	T	G	C	C	G	A	T	T	C	T	C	A
WENXIANGNUO::[B106]	B106		indx	11	C	G	G	G	C	C	A	A	C	A	G	G	T	G	T	C	G	G	A	C	T	G	C	A	G	G	T	G	T	C	C	A	T	T	G	C	C	G	A	T	T	C	T	C	A
XIANGGU::[B108]	B108		indx	12	C	G	G	G	C	C	A	A	C	A	G	G	T	G	T	C	G	G	A	C	T	G	C	A	G	G	T	G	T	C	C	A	T	T	G	C	C	G	A	T	T	C	T	C	A
LENGSHUIGU 2::[B109]	B109		japx	11	C	G	G	G	C	C	A	A	C	A	G	G	T	G	T	C	G	G	A	C	T	G	C	A	G	G	T	G	T	C	C	A	T	T	G	C	C	G	A	T	T	C	T	C	A
LIUSHA 1::[B112]	B112		ind1A	11	C	G	G	G	C	C	A	A	C	A	G	G	T	G	T	C	G	G	A	C	T	G	C	A	G	G	T	G	T	C	C	A	T	T	G	C	C	G	A	T	T	C	T	C	A
CHENWAN 3::[B113]	B113		indx	11	C	G	G	G	C	C	A	A	C	A	G	G	T	G	T	C	G	G	A	C	T	G	C	A	G	G	T	G	T	C	C	A	T	T	G	C	C	G	A	T	T	C	T	C	A
ERGANGAI::[B118]	B118		indx	11	C	G	G	G	C	C	A	A	C	A	G	G	T	G	T	C	G	G	A	C	T	G	C	A	G	G	T	G	T	C	C	A	T	T	G	C	C	G	A	T	T	C	T	C	A
GUANGLUAI 15-1::[B119]	B119		ind1A	11	C	G	G	G	C	C	A	A	C	A	G	G	T	G	T	C	G	G	A	C	T	G	C	A	G	G	T	G	T	C	C	A	T	T	G	C	C	G	A	T	T	C	T	C	A
LUKE 3::[B121]	B121		ind1A	11	C	G	G	G	C	C	A	A	C	A	G	G	T	G	T	C	G	G	A	C	T	G	C	A	G	G	T	G	T	C	C	A	T	T	G	C	C	G	A	T	T	C	T	C	A
XIANGWANXIAN 3::[B125]	B125		indx	11	C	G	G	G	C	C	A	A	C	A	G	G	T	G	T	C	G	G	A	C	T	G	C	A	G	G	T	G	T	C	C	A	T	T	G	C	C	G	A	T	T	C	T	C	A
ZAOXIAN 240::[B126]	B126		ind1A	11	C	G	G	G	C	C	A	A	C	A	G	G	T	G	T	C	G	G	A	C	T	G	C	A	G	G	T	G	T	C	C	A	T	T	G	C	C	G	A	T	T	C	T	C	A
DANGYU 5::[B127]	B127		ind1A	11	C	G	G	G	C	C	A	A	C	A	G	G	T	G	T	C	G	G	A	C	T	G	C	A	G	G	T	G	T	C	C	A	T	T	G	C	C	G	A	T	T	C	T	C	A
SIBEITIZHAO 6::[B128]	B128		indx	11	C	G	G	G	C	C	A	A	C	A	G	G	T	G	T	C	G	G	A	C	T	G	C	A	G	G	T	G	T	C	C	A	T	T	G	C	C	G	A	T	T	C	T	C	A
HONGAINUO::[B129]	B129		indx	11	C	G	G	G	C	C	A	A	C	A	G	G	T	G	T	C	G	G	A	C	T	G	C	A	G	G	T	G	T	C	C	A	T	T	G	C	C	G	A	T	T	C	T	C	A
AIZIZHAN::[B131]	B131		indx	11	C	G	G	G	C	C	A	A	C	A	G	G	T	G	T	C	G	G	A	C	T	G	C	A	G	G	T	G	T	C	C	A	T	T	G	C	C	G	A	T	T	C	T	C	A
YANSHUICHI::[B133]	B133		indx	11	C	G	G	G	C	C	A	A	C	A	G	G	T	G	T	C	G	G	A	C	T	G	C	A	G	G	T	G	T	C	C	A	T	T	G	C	C	G	A	T	T	C	T	C	A
HONGGENGHANGU3::[B135]	B135		indx	11	C	G	G	G	C	C	A	A	C	A	G	G	T	G	T	C	G	G	A	C	T	G	C	A	G	G	T	G	T	C	C	A	T	T	G	C	C	G	A	T	T	C	T	C	A
80B::[B137]	B137		indx	12	C	G	G	G	C	C	A	A	C	A	G	G	T	G	T	C	G	G	A	C	T	G	C	A	G	G	T	G	T	C	C	A	T	T	G	C	C	G	A	T	T	C	T	C	A
IR 661-1::[B139]	B139		indx	11	C	G	G	G	C	C	A	A	C	A	G	G	T	G	T	C	G	G	A	C	T	G	C	A	G	G	T	G	T	C	C	A	T	T	G	C	C	G	A	T	T	C	T	C	A
GENG 7623::[B141]	B141		admix	11	C	G	G	G	C	C	A	A	C	A	G	G	T	G	T	C	G	G	A	C	T	G	C	A	G	G	T	G	T	C	C	A	T	T	G	C	C	G	A	T	T	C	T	C	A
JWR 221::[B146]	B146		ind1B	11	C	G	G	G	C	C	A	A	C	A	G	G	T	G	T	C	G	G	A	C	T	G	C	A	G	G	T	G	T	C	C	A	T	T	G	C	C	G	A	T	T	C	T	C	A
HAOXIANG::[B149]	B149		ind1A	11	C	G	G	G	C	C	A	A	C	A	G	G	T	G	T	C	G	G	A	C	T	G	C	A	G	G	T	G	T	C	C	A	T	T	G	C	C	G	A	T	T	C	T	C	A
G ZHENSHAN 97B::[B156]	B156		ind1A	11	C	G	G	G	C	C	A	A	C	A	G	G	T	G	T	C	G	G	A	C	T	G	C	A	G	G	T	G	T	C	C	A	T	T	G	C	C	G	A	T	T	C	T	C	A
88B::[B157]	B157		ind1A	11	C	G	G	G	C	C	A	A	C	A	G	G	T	G	T	C	G	G	A	C	T	G	C	A	G	G	T	G	T	C	C	A	T	T	G	C	C	G	A	T	T	C	T	C	A
TAIZHONGZAILAI 1/TAIZHONG65::[B159]	B159		indx	11	C	G	G	G	C	C	A	A	C	A	G	G	T	G	T	C	G	G	A	C	T	G	C	A	G	G	T	G	T	C	C	A	T	T	G	C	C	G	A	T	T	C	T	C	A
LIUSHIZAO::[B163]	B163		ind1A	11.5	C	G	G	G	C	C	A	A	C	A	G	G	T	G	T	C	G	G	A	C	T	G	C	A	G	G	T	G	T	C	C	A	T	T	G	C	C	G	A	T	T	C	T	C	A
ZHUYUAN::[B168]	B168	IRGC 136096	temp	11	C	G	G	G	C	C	A	A	C	A	G	G	T	G	T	C	G	G	A	C	T	G	C	A	G	G	T	G	T	C	C	A	T	T	G	C	C	G	A	T	T	C	T	C	A
LINGUO::[B171]	B171	IRGC 135974	temp	11	C	G	G	G	C	C	A	A	C	A	G	G	T	G	T	C	G	G	A	C	T	G	C	A	G	G	T	G	T	C	C	A	T	T	G	C	C	G	A	T	T	C	T	C	A
BRC 25-146-2-1::[B176]	B176	IRGC 135850	indx	11	C	G	G	G	C	C	A	A	C	A	G	G	T	G	T	C	G	G	A	C	T	G	C	A	G	G	T	G	T	C	C	A	T	T	G	C	C	G	A	T	T	C	T	C	A
P1790-5-1M-4-5M-1B-3M-B::[B180]	B180	IRGC 136016	indx	11	C	G	G	G	C	C	A	A	C	A	G	G	T	G	T	C	G	G	A	C	T	G	C	A	G	G	T	G	T	C	C	A	T	T	G	C	C	G	A	T	T	C	T	C	A
QINGNUO KYOHATAMOCHI::[B183]	B183	IRGC 136030	temp	10.5	C	G	G	G	C	C	A	A	C	A	G	G	T	G	T	C	G	G	A	C	T	T/G	C	A	G	G	T	G	T	C	C	A	T	T	G	C	C	G	A	T	T	C	T	C	A
ITA 221::[B190]	B190		trop	11	C	G	G	G	C	C	A	A	C	A	G	G	T	G	T	C	G	G	A	C	T	G	C	A	G	G	T	G	T	C	C	A	T	T	G	C	C	G	A	T	T	C	T	C	A
R42::[B192]	B192	IRGC 136033	admix	11	C	G	G	G	C	C	A	A	C	A	G	G	T	G	T	C	G	G	A	C	T	G	C	A	G	G	T	G	T	C	C	A	T	T	G	C	C	G	A	T	T	C	T	C	A
PMS 10B::[B195]	B195	IRGC 136021	indx	10.5	C	G	G	G	C	C	A	A	C	A	G	G	T	G	T	C	G	G	A	C	T	T/G	C	A	G	G	T	G	T	C	C	A	T	T	G	C	C	G	A	T	T	C	T	C	A
JINYOU 1::[B200]	B200	IRGC 135959	ind1B	11	C	G	G	G	C	C	A	A	C	A	G	G	T	G	T	C	G	G	A	C	T	G	C	A	G	G	T	G	T	C	C	A	T	T	G	C	C	G	A	T	T	C	T	C	A
LONGHUAMAOHU::[B204]	B204		temp	11	C	G	G	G	C	C	A	A	C	A	G	G	T	G	T	C	G	G	A	C	T	G	C	A	G	G	T	G	T	C	C	A	T	T	G	C	C	G	A	T	T	C	T	C	A
AIHECHI::[B207]	B207		indx	11	C	G	G	G	C	C	A	A	C	A	G	G	T	G	T	C	G	G	A	C	T	G	C	A	G	G	T	G	T	C	C	A	T	T	G	C	C	G	A	T	T	C	T	C	A
LUCAIHAO::[B208]	B208		ind1A	11	C	G	G	G	C	C	A	A	C	A	G	G	T	G	T	C	G	G	A	C	T	G	C	A	G	G	T	G	T	C	C	A	T	T	G	C	C	G	A	T	T	C	T	C	A
NANXIONGZAOYOUZHAN::[B210]	B210		ind1A	12	C	G	G	G	C	C	A	A	C	A	G	G	T	G	T	C	G	G	A	C	T	G	C	A	G	G	T	G	T	C	C	A	T	T	G	C	C	G	A	T	T	C	T	C	A
CHIKENUO::[B212]	B212		temp	11	C	G	G	G	C	C	A	A	C	A	G	G	T	G	T	C	G	G	A	C	T	G	C	A	G	G	T	G	T	C	C	A	T	T	G	C	C	G	A	T	T	C	T	C	A
LIUYENIAN::[B213]	B213		ind1A	11	C	G	G	G	C	C	A	A	C	A	G	G	T	G	T	C	G	G	A	C	T	G	C	A	G	G	T	G	T	C	C	A	T	T	G	C		G	A	T	T	C	T	C	A
XUANENCHANGTANQINGZHAN::[B214]	B214		ind1B	11	C	G	G	G	C	C	A	A	C	A	G	G	T	G	T	C	G	G	A	C	T	G	C	A	G	G	T	G	T	C	C	A	T	T	G	C	C	G	A	T	T	C	T	C	A
HONGGU::[B217]	B217		ind1B	11	C	G	G	G	C	C	A	A	C	A	G	G	T	G	T	C	G	G	A	C	T	G	C	A	G	G	T	G	T	C	C	A	T	T	G	C	C	G	A	T	T	C	T	C	A
BEIZINUO::[B222]	B222		ind1A	11	C	G	G	G	C	C	A	A	C	A	G	G	T	G	T	C	G	G	A	C	T	G	C	A	G	G	T	G	T	C	C	A	T	T	G	C	C	G	A	T	T	C	T	C	A
CUNGUNUO::[B223]	B223		temp	11	C	G	G	G	C	C	A	A	C	A	G	G	T	G	T	C	G	G	A	C	T	G	C	A	G	G	T	G	T	C	C	A	T	T	G	C	C	G	A	T	T	C	T	C	A
MENJIAGAO 1::[B227]	B227		indx	10.5	C	G	G	G	C	C	A	A	C	A	G	G	T	G	T	C	G	G	A	C	T	G	C	A	G	G	T	A/G	T	C	C	A	T	T	G	C	C	G	A	T	T	C	T	C	A
B231::[B231]	B231		indx	11	C	G	G	G	C	C	A	A	C	A	G	G	T	G	T	C	G	G	A	C	T	G	C	A	G	G	T	G	T	C	C	A	T	T	G	C	C	G	A	T	T	C	T	C	A
XIANGAIZAO 10HAO::[B232]	B232		ind1B	11	C	G	G	G	C	C	A	A	C	A	G	G	T	G	T	C	G	G	A	C	T	G	C	A	G	G	T	G	T	C	C	A	T	T	G	C	C	G	A	T	T	C	T	C	A
XIANGWANXIAN 1::[B233]	B233		indx	11	C	G	G	G	C	C	A	A	C	A	G	G	T	G	T	C	G	G	A	C	T	G	C	A	G	G	T	G	T	C	C	A	T	T	G	C	C	G	A	T	T	C	T	C	A
XIANGDAO::[B244]	B244		ind1A	12	C	G	G	G	C	C	A	A	C	A	G	G	T	G	T	C	G	G	A	C	T	G	C	A	G	G	T	G	T	C	C	A	T	T	G	C	C	G	A	T	T	C	T	C	A
JINNANTE B::[B247]	B247		indx	11.5	C	G	G	G	C	C	A	A	C	A	G	G	T	G	T	C	G	G	A	C	T	G	C	A	G	G	T	G	T	C	C	A	T	T	G	C	C	G	A	T	T	C	T	C	A
CHAOYANGYIHAO B::[B249]	B249		ind1A	12	C	G	G	G	C	C	A	A	C	A	G	G	T	G	T	C	G	G	A	C	T	G	C	A	G	G	T	G	T	C	C	A	T	T	G	C	C	G	A	T	T	C	T	C	A
XIANGAI B::[B252]	B252		indx	11	C	G	G	G	C	C	A	A	C	A	G	G	T	G	T	C	G	G	A	C	T	G	C	A	G	G	T	G	T	C	C	A	T	T	G	C	C	G	A	T	T	C	T	C	A
SANBAILI::[B264]	B264		ind1A	11	C	G	G	G	C	C	A	A	C	A	G	G	T	G	T	C	G	G	A	C	T	G	C	A	G	G	T	G	T	C	C	A	T	T	G	C	C	G	A	T	T	C	T	C	A
NON SPECIFIED::[B267]	B267		indx	11	C	G	G	G	C	C	A	A	C	A	G	G	T	G	T	C	G	G	A	C	T	G	C	A	G	G	T	G	T	C	C	A	T	T	G	C	C	G	A	T	T	C	T	C	A
NANGAOGU::[B268]	B268		indx	12	C	G	G	G	C	C	A	A	C	A	G	G	T	G	T	C	G	G	A	C	T	G	C	A	G	G	T	G	T	C	C	A	T	T	G	C	C	G	A	T	T	C	T	C	A
GANG 46B::[CX10]	CX10	IRGC 135890	ind1A	12	C	G	G	G	C	C	A	A	C	A	G	G	T	G	T	C	G	G	A	C	T	G	C	A	G	G	T	G	T	C	C	A	T	T	G	C	C	G	A	T	T	C	T	C	A
PALUNG 2::[CX100]	CX100	IRGC 136020	ind1B	11	C	G	G	G	C	C	A	A	C	A	G	G	T	G	T	C	G	G	A	C	T	G	C	A	G	G	T	G	T	C	C	A	T	T	G	C	C	G	A	T	T	C	T	C	A
HEI MI CHAN::[CX101]	CX101	IRGC 135902	ind1A	11	C	G	G	G	C	C	A	A	C	A	G	G	T	G	T	C	G	G	A	C	T	G	C	A	G	G	T	G	T	C	C	A	T	T	G	C	C	G	A	T	T	C	T	C	A
TEK SI CHUT::[CX102]	CX102	IRGC 136053	ind1A	11	C	G	G	G	C	C	A	A	C	A	G	G	T	G	T	C	G	G	A	C	T	G	C	A	G	G	T	G	T	C	C	A	T	T	G	C	C	G	A	T	T	C	T	C	A
TUN SART::[CX107]	CX107	IRGC 136060	ind3	11	C	G	G	G	C	C	A	A	C	A	G	G	T	G	T	C	G	G	A	C	T	G	C	A	G	G	T	G	T	C	C	A	T	T	G	C	C	G	A	T	T	C	T	C	A
GUANG LU AI 4::[CX114]	CX114		ind1A	11	C	G	G	G	C	C	A	A	C	A	G	G	T	G	T	C	G	G	A	C	T	G	C	A	G	G	T	G	T	C	C	A	T	T	G	C	C	G	A	T	T	C	T	C	A
WUDADAOZHONG::[CX116]	CX116	IRGC 136070	temp	11	C	G	G	G	C	C	A	A	C	A	G	G	T	G	T	C	G	G	A	C	T	G	C	A	G	G	T	G	T	C	C	A	T	T	G	C	C	G	A	T	T	C	T	C	A
IR65600-27-1-2-2::[CX117]	CX117	IRGC 135930	indx	11	C	G	G	G	C	C	A	A	C	A	G	G	T	G	T	C	G	G	A	C	T	G	C	A	G	G	T	G	T	C	C	A	T	T	G	C	C	G	A	T	T	C	T	C	A
P59279::[CX119]	CX119		indx	11	C	G	G	G	C	C	A	A	C	A	G	G	T	G	T	C	G	G	A	C	T	G	C	A	G	G	T	G	T	C	C	A	T	T	G	C	C	G	A	T	T	C	T	C	A
HUAGENGXIAN 74::[CX12]	CX12	IRGC 135909	indx	11	C	G	G	G	C	C	A	A	C	A	G	G	T	G	T	C	G	G	A	C	T	G	C	A	G	G	T	G	T	C	C	A	T	T	G	C	C	G	A	T	T	C	T	C	A
TKM6::[CX120]	CX120	IRGC 136057	indx	11	C	G	G	G	C	C	A	A	C	A	G	G	T	G	T	C	G	G	A	C	T	G	C	A	G	G	T	G	T	C	C	A	T	T	G	C	C	G	A	T	T	C	T	C	A
GUANG122::[CX121]	CX121		ind1B	11	C	G	G	G	C	C	A	A	C	A	G	G	T	G	T	C	G	G	A	C	T	G	C	A	G	G	T	G	T	C	C	A	T	T	G	C	C	G	A	T	T	C	T	C	A
TAI-ZHONG-XIAN 10::[CX122]	CX122		indx	11	C	G	G	G	C	C	A	A	C	A	G	G	T	G	T	C	G	G	A	C	T	G	C	A	G	G	T	G	T	C	C	A	T	T	G	C	C	G	A	T	T	C	T	C	A
CAOZHAO-2::[CX125]	CX125		ind1B	11	C	G	G	G	C	C	A	A	C	A	G	G	T	G	T	C	G	G	A	C	T	G	C	A	G	G	T	G	T	C	C	A	T	T	G	C	C	G	A	T	T	C	T	C	A
IRBB60::[CX126]	CX126	IRGC 135946	ind1B	10.5	C	G	G	G	C	C	A	A	C	A	G	G	T	G	T	C	G	G	A	C	T	G	C	A	G	G	C/T	G	T	C	C	A	T	T	G	C	C	G	A	T	T	C	T	C	A
AP423::[CX132]	CX132	IRGC 135830	trop	11	C	G	G	G	C	C	A	A	C	A	G	G	T	G	T	C	G	G	A	C	T	G	C	A	G	G	T	G	T	C	C	A	T	T	G	C	C	G	A	T	T	C	T	C	A
ZHENGSHAN97::[CX133]	CX133		ind1A	11	C	G	G	G	C	C	A	A	C	A	G	G	T	G	T	C	G	G	A	C	T	G	C	A	G	G	T	G	T	C	C	A	T	T	G	C	C	G	A	T	T	C	T	C	A
IRBB7::[CX134]	CX134	IRGC 135948	ind1B	11	C	G	G	G	C	C	A	A	C	A	G	G	T	G	T	C	G	G	A	C	T	G	C	A	G	G	T	G	T	C	C	A	T	T	G	C	C	G	A	T	T	C	T	C	A
QD_441::[CX138]	CX138		japx	11	C	G	G	G	C	C	A	A	C	A	G	G	T	G	T	C	G	G	A	C	T	G	C	A	G	G	T	G	T	C	C	A	T	T	G	C	C	G	A	T	T	C	T	C	A
NIPPONBARE::[CX140]	CX140	IRGC 136196	temp	11	C	G	G	G	C	C	A	A	C	A	G	G	T	G	T	C	G	G	A	C	T	G	C	A	G	G	T	G	T	C	C	A	T	T	G	C	C	G	A	T	T	C	T	C	A
HTA7204::[CX144]	CX144	IRGC 135906	indx	11	C	G	G	G	C	C	A	A	C	A	G	G	T	G	T	C	G	G	A	C	T	G	C	A	G	G	T	G	T	C	C	A	T	T	G	C	C	G	A	T	T	C	T	C	A
MINGHUI 63::[CX145]	CX145	IRGC 117271	indx	11	C	G	G	G	C	C	A	A	C	A	G	G	T	G	T	C	G	G	A	C	T	G	C	A	G	G	T	G	T	C	C	A	T	T	G	C	C	G	A	T	T	C	T	C	A
SEBERANG::[CX147]	CX147		indx	11	C	G	G	G	C	C	A	A	C	A	G	G	T	G	T	C	G	G	A	C	T	G	C	A	G	G	T	G	T	C	C	A	T	T	G	C	C	G	A	T	T	C	T	C	A
SRI RAJA::[CX148]	CX148	IRGC 136050	ind3	11	C	G	G	G	C	C	A	A	C	A	G	G	T	G	T	C	G	G	A	C	T	G	C	A	G	G	T	G	T	C	C	A	T	T	G	C	C	G	A	T	T	C	T	C	A
Y134::[CX15]	CX15	IRGC 136077	ind1B	11	C	G	G	G	C	C	A	A	C	A	G	G	T	G	T	C	G	G	A	C	T	G	C	A	G	G	T	G	T	C	C	A	T	T	G	C	C	G	A	T	T	C	T	C	A
CISADANE::[CX152]	CX152	IRGC 135866	ind1B	11	C	G	G	G	C	C	A	A	C	A	G	G	T	G	T	C	G	G	A	C	T	G	C	A	G	G	T	G	T	C	C	A	T	T	G	C	C	G	A	T	T	C	T	C	A
KHAO DAWK MALI 105::[CX154]	CX154	IRGC 135967	ind3	11	C	G	G	G	C	C	A	A	C	A	G	G	T	G	T	C	G	G	A	C	T	G	C	A	G	G	T	G	T	C	C	A	T	T	G	C	C	G	A	T	T	C	T	C	A
PTB33::[CX157]	CX157	IRGC 136025	indx	11	C	G	G	G	C	C	A	A	C	A	G	G	T	G	T	C	G	G	A	C	T	G	C	A	G	G	T	G	T	C	C	A	T	T	G	C	C	G	A	T	T	C	T	C	A
SHWE WAR TUN::[CX158]	CX158	IRGC 136046	ind3	11	C	G	G	G	C	C	A	A	C	A	G	G	T	G	T	C	G	G	A	C	T	G	C	A	G	G	T	G	T	C	C	A	T	T	G	C	C	G	A	T	T	C	T	C	A
YUAN JING 7::[CX16]	CX16		temp	11	C	G	G	G	C	C	A	A	C	A	G	G	T	G	T	C	G	G	A	C	T	G	C	A	G	G	T	G	T	C	C	A	T	T	G	C	C	G	A	T	T	C	T	C	A
ZAOXIAN 14::[CX18]	CX18	IRGC 136089	ind1A	11	C	G	G	G	C	C	A	A	C	A	G	G	T	G	T	C	G	G	A	C	T	G	C	A	G	G	T	G	T	C	C	A	T	T	G	C	C	G	A	T	T	C	T	C	A
ZHONG 413::[CX19]	CX19		indx	11	C	G	G	G	C	C	A	A	C	A	G	G	T	G	T	C	G	G	A	C	T	G	C	A	G	G	T	G	T	C	C	A	T	T	G	C	C	G	A	T	T	C	T	C	A
BR11::[CX2]	CX2	IRGC 135847	indx	11	C	G	G	G	C	C	A	A	C	A	G	G	T	G	T	C	G	G	A	C	T	G	C	A	G	G	T	G	T	C	C	A	T	T	G	C	C	G	A	T	T	C	T	C	A
ZIHUI 100::[CX20]	CX20		indx	11	C	G	G	G	C	C	A	A	C	A	G	G	T	G	T	C	G	G	A	C	T	G	C	A	G	G	T	G	T	C	C	A	T	T	G	C	C	G	A	T	T	C	T	C	A
IR2061-522-6-9::[CX206]	CX206	IRGC 135918	ind1B	11	C	G	G	G	C	C	A	A	C	A	G	G	T	G	T	C	G	G	A	C	T	G	C	A	G	G	T	G	T	C	C	A	T	T	G	C	C	G	A	T	T	C	T	C	A
BG90-2::[CX21]	CX21	IRGC 135842	ind1B	11	C	G	G	G	C	C	A	A	C	A	G	G	T	G	T	C	G	G	A	C	T	G	C	A	G	G	T	G	T	C	C	A	T	T	G	C	C	G	A	T	T	C	T	C	A
NONGKEN 58::[CX212]	CX212	IRGC 136009	temp	11	C	G	G	G	C	C	A	A	C	A	G	G	T	G	T	C	G	G	A	C	T	G	C	A	G	G	T	G	T	C	C	A	T	T	G	C	C	G	A	T	T	C	T	C	A
CHENNONG 89366::[CX213]	CX213		temp	11	C	G	G	G	C	C	A	A	C	A	G	G	T	G	T	C	G	G	A	C	T	G	C	A	G	G	T	G	T	C	C	A	T	T	G	C	C	G	A	T	T	C	T	C	A
TYPE3::[CX218]	CX218	IRGC 136061	ind1B	11	C	G	G	G	C	C	A	A	C	A	G	G	T	G	T	C	G	G	A	C	T	G	C	A	G	G	T	G	T	C	C	A	T	T	G	C	C	G	A	T	T	C	T	C	A
FL478::[CX219]	CX219	IRGC 135888	indx	11	C	G	G	G	C	C	A	A	C	A	G	G	T	G	T	C	G	G	A	C	T	G	C	A	G	G	T	G	T	C	C	A	T	T	G	C	C	G	A	T	T	C	T	C	A
PR106::[CX22]	CX22	IRGC 136022	ind1B	11	C	G	G	G	C	C	A	A	C	A	G	G	T	G	T	C	G	G	A	C	T	G	C	A	G	G	T	G	T	C	C	A	T	T	G	C	C	G	A	T	T	C	T	C	A
ZHONGYOUZAO 81::[CX221]	CX221	IRGC 136095	indx	11	C	G	G	G	C	C	A	A	C	A	G	G	T	G	T	C	G	G	A	C	T	G	C	A	G	G	T	G	T	C	C	A	T	T	G	C	C	G	A	T	T	C	T	C	A
IR77298-14-1-2::[CX225]	CX225	IRGC 135938	ind1B	11	C	G	G	G	C	C	A	A	C	A	G	G	T	G	T	C	G	G	A	C	T	G	C	A	G	G	T	G	T	C	C	A	T	T	G	C	C	G	A	T	T	C	T	C	A
RASI::[CX23]	CX23		ind3	11	C	G	G	G	C	C	A	A	C	A	G	G	T	G	T	C	G	G	A	C	T	G	C	A	G	G	T	G	T	C	C	A	T	T	G	C	C	G	A	T	T	C	T	C	A
IR64-IL::[CX230]	CX230	IRGC 135929	ind1B	11	C	G	G	G	C	C	A	A	C	A	G	G	T	G	T	C	G	G	A	C	T	G	C	A	G	G	T	G	T	C	C	A	T	T	G	C	C	G	A	T	T	C	T	C	A
IR52561-UBN-1-1-2::[CX231]	CX231	IRGC 135923	indx	11	C	G	G	G	C	C	A	A	C	A	G	G	T	G	T	C	G	G	A	C	T	G	C	A	G	G	T	G	T	C	C	A	T	T	G	C	C	G	A	T	T	C	T	C	A
IR58821-23-1-3-1::[CX233]	CX233	IRGC 135926	indx	11	C	G	G	G	C	C	A	A	C	A	G	G	T	G	T	C	G	G	A	C	T	G	C	A	G	G	T	G	T	C	C	A	T	T	G	C	C	G	A	T	T	C	T	C	A
VANDANA::[CX236]	CX236	IRGC 117598	indx	12	C	G	G	G	C	C	A	A	C	A	G	G	T	G	T	C	G	G	A	C	T	G	C	A	G	G	T	G	T	C	C	A	T	T	G	C	C	G	A	T	T	C	T	C	A
TKM 9::[CX24]	CX24	IRGC 136058	indx	11	C	G	G	G	C	C	A	A	C	A	G	G	T	G	T	C	G	G	A	C	T	G	C	A	G	G	T	G	T	C	C	A	T	T	G	C	C	G	A	T	T	C	T	C	A
2004::[CX249]	CX249	IRGC 135814	ind1B	11	C	G	G	G	C	C	A	A	C	A	G	G	T	G	T	C	G	G	A	C	T	G	C	A	G	G	T	G	T	C	C	A	T	T	G	C	C	G	A	T	T	C	T	C	A
829::[CX250]	CX250	IRGC 135820	ind1B	11	C	G	G	G	C	C	A	A	C	A	G	G	T	G	T	C	G	G	A	C	T	G	C	A	G	G	T	G	T	C	C	A	T	T	G	C	C	G	A	T	T	C	T	C	A
MONOLAYA::[CX265]	CX265	IRGC 135988	indx	11	C	G	G	G	C	C	A	A	C	A	G	G	T	G	T	C	G	G	A	C	T	G	C	A	G	G	T	G	T	C	C	A	T	T	G	C	C	G	A	T	T	C	T	C	A
NONA BOKRA::[CX273]	CX273		indx	11	C	G	G	G	C	C	A	A	C	A	G	G	T	G	T	C	G	G	A	C	T	G	C	A	G	G	T	G	T	C	C	A	T	T	G	C	C	G	A	T	T	C	T	C	A
IR26::[CX274]	CX274	IRGC 135919	indx	11	C	G	G	G	C	C	A	A	C	A	G	G	T	G	T	C	G	G	A	C	T	G	C	A	G	G	T	G	T	C	C	A	T	T	G	C	C	G	A	T	T	C	T	C	A
IR34::[CX275]	CX275		indx	11	C	G	G	G	C	C	A	A	C	A	G	G	T	G	T	C	G	G	A	C	T	G	C	A	G	G	T	G	T	C	C	A	T	T	G	C	C	G	A	T	T	C	T	C	A
IR8192-200-3-3-1-1::[CX276]	CX276	IRGC 135939	ind1B	11	C	G	G	G	C	C	A	A	C	A	G	G	T	G	T	C	G	G	A	C	T	G	C	A	G	G	T	G	T	C	C	A	T	T	G	C	C	G	A	T	T	C	T	C	A
02428-IL::[CX277]	CX277	IRGC 135810	japx	11	C	G	G	G	C	C	A	A	C	A	G	G	T	G	T	C	G	G	A	C	T	G	C	A	G	G	T	G	T	C	C	A	T	T	G	C	C	G	A	T	T	C	T	C	A
GAYABYEO::[CX28]	CX28	IRGC 135892	ind1B	11	C	G	G	G	C	C	A	A	C	A	G	G	T	G	T	C	G	G	A	C	T	G	C	A	G	G	T	G	T	C	C	A	T	T	G	C	C	G	A	T	T	C	T	C	A
IR68897B::[CX281]	CX281	IRGC 135934	ind1B	11	C	G	G	G	C	C	A	A	C	A	G	G	T	G	T	C	G	G	A	C	T	G	C	A	G	G	T	G	T	C	C	A	T	T	G	C	C	G	A	T	T	C	T	C	A
C349::[CX286]	CX286		admix	11	C	G	G	G	C	C	A	A	C	A	G	G	T	G	T	C	G	G	A	C	T	G	C	A	G	G	T	G	T	C	C	A	T	T	G	C	C	G	A	T	T	C	T	C	A
D11::[CX288]	CX288	IRGC 135874	indx	11	C	G	G	G	C	C	A	A	C	A	G	G	T	G	T	C	G	G	A	C	T	G	C	A	G	G	T	G	T	C	C	A	T	T	G	C	C	G	A	T	T	C	T	C	A
DUO 57::[CX290]	CX290		ind1B	11	C	G	G	G	C	C	A	A	C	A	G	G	T	G	T	C	G	G	A	C	T	G	C	A	G	G	T	G	T	C	C	A	T	T	G	C	C	G	A	T	T	C	T	C	A
D15::[CX291]	CX291	IRGC 135875	indx	11	C	G	G	G	C	C	A	A	C	A	G	G	T	G	T	C	G	G	A	C	T	G	C	A	G	G	T	G	T	C	C	A	T	T	G	C	C	G	A	T	T	C	T	C	A
IR74::[CX296]	CX296	IRGC 135937	indx	11	C	G	G	G	C	C	A	A	C	A	G	G	T	G	T	C	G	G	A	C	T	G	C	A	G	G	T	G	T	C	C	A	T	T	G	C	C	G	A	T	T	C	T	C	A
MR185::[CX30]	CX30	IRGC 135991	ind1B	11	C	G	G	G	C	C	A	A	C	A	G	G	T	G	T	C	G	G	A	C	T	G	C	A	G	G	T	G	T	C	C	A	T	T	G	C	C	G	A	T	T	C	T	C	A
ZH5::[CX305]	CX305	IRGC 136090	ind1B	11	C	G	G	G	C	C	A	A	C	A	G	G	T	G	T	C	G	G	A	C	T	G	C	A	G	G	T	G	T	C	C	A	T	T	G	C	C	G	A	T	T	C	T	C	A
HNANKAR::[CX31]	CX31	IRGC 135903	ind1B	11	C	G	G	G	C	C	A	A	C	A	G	G	T	G	T	C	G	G	A	C	T	G	C	A	G	G	T	G	T	C	C	A	T	T	G	C	C	G	A	T	T	C	T	C	A
R106::[CX313]	CX313		indx	11	C	G	G	G	C	C	A	A	C	A	G	G	T	G	T	C	G	G	A	C	T	G	C	A	G	G	T	G	T	C	C	A	T	T	G	C	C	G	A	T	T	C	T	C	A
117::[CX314]	CX314	IRGC 135813	ind1B	11	C	G	G	G	C	C	A	A	C	A	G	G	T	G	T	C	G	G	A	C	T	G	C	A	G	G	T	G	T	C	C	A	T	T	G	C	C	G	A	T	T	C	T	C	A
MR39::[CX316]	CX316	IRGC 135993	admix	11	C	G	G	G	C	C	A	A	C	A	G	G	T	G	T	C	G	G	A	C	T	G	C	A	G	G	T	G	T	C	C	A	T	T	G	C	C	G	A	T	T	C	T	C	A
MR19::[CX317]	CX317	IRGC 135992	temp	11	C	G	G	G	C	C	A	A	C	A	G	G	T	G	T	C	G	G	A	C	T	G	C	A	G	G	T	G	T	C	C	A	T	T	G	C	C	G	A	T	T	C	T	C	A
HEIHEAIHUI::[CX318]	CX318		indx	11	C	G	G	G	C	C	A	A	C	A	G	G	T	G	T	C	G	G	A	C	T	G	C	A	G	G	T	G	T	C	C	A	T	T	G	C	C	G	A	T	T	C	T	C	A
SHWE THWE YIN HYV::[CX33]	CX33	IRGC 136045	ind1B	11	C	G	G	G	C	C	A	A	C	A	G	G	T	G	T	C	G	G	A	C	T	G	C	A	G	G	T	G	T	C	C	A	T	T	G	C	C	G	A	T	T	C	T	C	A
HUA 564::[CX340]	CX340	IRGC 135907	ind1B	11	C	G	G	G	C	C	A	A	C	A	G	G	T	G	T	C	G	G	A	C	T	G	C	A	G	G	T	G	T	C	C	A	T	T	G	C	C	G	A	T	T	C	T	C	A
HUA 565::[CX341]	CX341	IRGC 135908	indx	11	C	G	G	G	C	C	A	A	C	A	G	G	T	G	T	C	G	G	A	C	T	G	C	A	G	G	T	G	T	C	C	A	T	T	G	C	C	G	A	T	T	C	T	C	A
WANXIAN 763::[CX342]	CX342	IRGC 136068	indx	11	C	G	G	G	C	C	A	A	C	A	G	G	T	G	T	C	G	G	A	C	T	G	C	A	G	G	T	G	T	C	C	A	T	T	G	C	C	G	A	T	T	C	T	C	A
SAGCï¼4::[CX346]	CX346	IRGC 136038	indx	11	C	G	G	G	C	C	A	A	C	A	G	G	T	G	T	C	G	G	A	C	T	G	C	A	G	G	T	G	T	C	C	A	T	T	G	C	C	G	A	T	T	C	T	C	A
SAGCï¼7::[CX347]	CX347	IRGC 136039	indx	11	C	G	G	G	C	C	A	A	C	A	G	G	T	G	T	C	G	G	A	C	T	G	C	A	G	G	T	G	T	C	C	A	T	T	G	C	C	G	A	T	T	C	T	C	A
ZHONGHUA 1::[CX348]	CX348	IRGC 136093	ind1B	11	C	G	G	G	C	C	A	A	C	A	G	G	T	G	T	C	G	G	A	C	T	G	C	A	G	G	T	G	T	C	C	A	T	T	G	C	C	G	A	T	T	C	T	C	A
KCD1::[CX349]	CX349	IRGC 135965	indx	11	C	G	G	G	C	C	A	A	C	A	G	G	T	G	T	C	G	G	A	C	T	G	C	A	G	G	T	G	T	C	C	A	T	T	G	C	C	G	A	T	T	C	T	C	A
053A-3::[CX351]	CX351	IRGC 135811	temp	11	C	G	G	G	C	C	A	A	C	A	G	G	T	G	T	C	G	G	A	C	T	G	C	A	G	G	T	G	T	C	C	A	T	T	G	C	C	G	A	T	T	C	T	C	A
CAU1::[CX353]	CX353	IRGC 135860	japx	11	C	G	G	G	C	C	A	A	C	A	G	G	T	G	T	C	G	G	A	C	T	G	C	A	G	G	T	G	T	C	C	A	T	T	G	C	C	G	A	T	T	C	T	C	A
CAU2::[CX354]	CX354	IRGC 135861	japx	11	C	G	G	G	C	C	A	A	C	A	G	G	T	G	T	C	G	G	A	C	T	G	C	A	G	G	T	G	T	C	C	A	T	T	G	C	C	G	A	T	T	C	T	C	A
Y075::[CX360]	CX360		ind1B	11	C	G	G	G	C	C	A	A	C	A	G	G	T	G	T	C	G	G	A	C	T	G	C	A	G	G	T	G	T	C	C	A	T	T	G	C	C	G	A	T	T	C	T	C	A
G341::[CX361]	CX361		ind1B	11	C	G	G	G	C	C	A	A	C	A	G	G	T	G	T	C	G	G	A	C	T	G	C	A	G	G	T	G	T	C	C	A	T	T	G	C	C	G	A	T	T	C	T	C	A
YZX1::[CX362]	CX362		ind1B	11	C	G	G	G	C	C	A	A	C	A	G	G	T	G	T	C	G	G	A	C	T	G	C	A	G	G	T	G	T	C	C	A	T	T	G	C	C	G	A	T	T	C	T	C	A
GANWANXIAN 37 (926)::[CX366]	CX366		indx	11	C	G	G	G	C	C	A	A	C	A	G	G	T	G	T	C	G	G	A	C	T	G	C	A	G	G	T	G	T	C	C	A	T	T	G	C	C	G	A	T	T	C	T	C	A
CHENGHUI 727::[CX370]	CX370		ind1B	11	C	G	G	G	C	C	A	A	C	A	G	G	T	G	T	C	G	G	A	C	T	G	C	A	G	G	T	G	T	C	C	A	T	T	G	C	C	G	A	T	T	C	T	C	A
NERICA-L-1::[CX375]	CX375	IRGC 136004	ind1B	11	C	G	G	G	C	C	A	A	C	A	G	G	T	G	T	C	G	G	A	C	T	G	C	A	G	G	T	G	T	C	C	A	T	T	G	C	C	G	A	T	T	C	T	C	A
NERICA-L-27::[CX377]	CX377	IRGC 136006	ind1B	11	C	G	G	G	C	C	A	A	C	A	G	G	T	G	T	C	G	G	A	C	T	G	C	A	G	G	T	G	T	C	C	A	T	T	G	C	C	G	A	T	T	C	T	C	A
HUHAN 15::[CX378]	CX378		ind1B	11	C	G	G	G	C	C	A	A	C	A	G	G	T	G	T	C	G	G	A	C	T	G	C	A	G	G	T	G	T	C	C	A	T	T	G	C	C	G	A	T	T	C	T	C	A
ADNY 11::[CX381]	CX381	IRGC 135821	ind1B	11	C	G	G	G	C	C	A	A	C	A	G	G	T	G	T	C	G	G	A	C	T	G	C	A	G	G	T	G	T	C	C	A	T	T	G	C	C	G	A	T	T	C	T	C	A
KOGOMG 1-1::[CX382]	CX382	IRGC 135971	ind1B	11	C	G	G	G	C	C	A	A	C	A	G	G	T	G	T	C	G	G	A	C	T	G	C	A	G	G	T	G	T	C	C	A	T	T	G	C	C	G	A	T	T	C	T	C	A
NPT-100::[CX385]	CX385	IRGC 136011	ind1B	11	C	G	G	G	C	C	A	A	C	A	G	G	T	G	T	C	G	G	A	C	T	G	C	A	G	G	T	G	T	C	C	A	T	T	G	C	C	G	A	T	T	C	T	C	A
NPT-114::[CX386]	CX386	IRGC 136012	indx	11	C	G	G	G	C	C	A	A	C	A	G	G	T	G	T	C	G	G	A	C	T	G	C	A	G	G	T	G	T	C	C	A	T	T	G	C	C	G	A	T	T	C	T	C	A
1088::[CX387]	CX387	IRGC 135812	ind1B	11	C	G	G	G	C	C	A	A	C	A	G	G	T	G	T	C	G	G	A	C	T	G	C	A	G	G	T	G	T	C	C	A	T	T	G	C	C	G	A	T	T	C	T	C	A
KR200::[CX388]	CX388	IRGC 135972	ind1B	11	C	G	G	G	C	C	A	A	C	A	G	G	T	G	T	C	G	G	A	C	T	G	C	A	G	G	T	G	T	C	C	A	T	T	G	C	C	G	A	T	T	C	T	C	A
JINYUAN 85::[CX389]	CX389	IRGC 135960	temp	11	C	G	G	G	C	C	A	A	C	A	G	G	T	G	T	C	G	G	A	C	T	G	C	A	G	G	T	G	T	C	C	A	T	T	G	C	C	G	A	T	T	C	T	C	A
SARD::[CX392]	CX392	IRGC 136043	indx	11	C	G	G	G	C	C	A	A	C	A	G	G	T	G	T	C	G	G	A	C	T	G	C	A	G	G	T	G	T	C	C	A	T	T	G	C	C	G	A	T	T	C	T	C	A
HUANGSIZHAN::[CX393]	CX393		ind1B	11	C	G	G	G	C	C	A	A	C	A	G	G	T	G	T	C	G	G	A	C	T	G	C	A	G	G	T	G	T	C	C	A	T	T	G	C	C	G	A	T	T	C	T	C	A
IR64A::[CX403]	CX403		ind1B	11	C	G	G	G	C	C	A	A	C	A	G	G	T	G	T	C	G	G	A	C	T	G	C	A	G	G	T	G	T	C	C	A	T	T	G	C	C	G	A	T	T	C	T	C	A
CX408::[CX408]	CX408		ind1B	11	C	G	G	G	C	C	A	A	C	A	G	G	T	G	T	C	G	G	A	C	T	G	C	A	G	G	T	G	T	C	C	A	T	T	G	C	C	G	A	T	T	C	T	C	A
CX409::[CX409]	CX409		ind1B	11	C	G	G	G	C	C	A	A	C	A	G	G	T	G	T	C	G	G	A	C	T	G	C	A	G	G	T	G	T	C	C	A	T	T	G	C	C	G	A	T	T	C	T	C	A
CX410::[CX410]	CX410		ind1B	11	C	G	G	G	C	C	A	A	C	A	G	G	T	G	T	C	G	G	A	C	T	G	C	A	G	G	T	G	T	C	C	A	T	T	G	C	C	G	A	T	T	C	T	C	A
CX411::[CX411]	CX411		ind1B	11	C	G	G	G	C	C	A	A	C	A	G	G	T	G	T	C	G	G	A	C	T	G	C	A	G	G	T	G	T	C	C	A	T	T	G	C	C	G	A	T	T	C	T	C	A
CX413::[CX413]	CX413		ind1B	11	C	G	G	G	C	C	A	A	C	A	G	G	T	G	T	C	G	G	A	C	T	G	C	A	G	G	T	G	T	C	C	A	T	T	G	C	C	G	A	T	T	C	T	C	A
CX414::[CX414]	CX414		ind1B	11	C	G	G	G	C	C	A	A	C	A	G	G	T	G	T	C	G	G	A	C	T	G	C	A	G	G	T	G	T	C	C	A	T	T	G	C	C	G	A	T	T	C	T	C	A
CX416::[CX416]	CX416		ind1B	11	C	G	G	G	C	C	A	A	C	A	G	G	T	G	T	C	G	G	A	C	T	G	C	A	G	G	T	G	T	C	C	A	T	T	G	C	C	G	A	T	T	C	T	C	A
CX417::[CX417]	CX417		ind1B	11	C	G	G	G	C	C	A	A	C	A	G	G	T	G	T	C	G	G	A	C	T	G	C	A	G	G	T	G	T	C	C	A	T	T	G	C	C	G	A	T	T	C	T	C	A
CX418::[CX418]	CX418		ind1B	11	C	G	G	G	C	C	A	A	C	A	G	G	T	G	T	C	G	G	A	C	T	G	C	A	G	G	T	G	T	C	C	A	T	T	G	C	C	G	A	T	T	C	T	C	A
CX419::[CX419]	CX419		ind1B	11	C	G	G	G	C	C	A	A	C	A	G	G	T	G	T	C	G	G	A	C	T	G	C	A	G	G	T	G	T	C	C	A	T	T	G	C	C	G	A	T	T	C	T	C	A
IR68552-55-3-2::[CX42]	CX42	IRGC 135933	indx	11	C	G	G	G	C	C	A	A	C	A	G	G	T	G	T	C	G	G	A	C	T	G	C	A	G	G	T	G	T	C	C	A	T	T	G	C	C	G	A	T	T	C	T	C	A
CX420::[CX420]	CX420		ind1B	11	C	G	G	G	C	C	A	A	C	A	G	G	T	G	T	C	G	G	A	C	T	G	C	A	G	G	T	G	T	C	C	A	T	T	G	C	C	G	A	T	T	C	T	C	A
CX421::[CX421]	CX421		ind1B	11	C	G	G	G	C	C	A	A	C	A	G	G	T	G	T	C	G	G	A	C	T	G	C	A	G	G	T	G	T	C	C	A	T	T	G	C	C	G	A	T	T	C	T	C	A
CX423::[CX423]	CX423		ind1B	11	C	G	G	G	C	C	A	A	C	A	G	G	T	G	T	C	G	G	A	C	T	G	C	A	G	G	T	G	T	C	C	A	T	T	G	C	C	G	A	T	T	C	T	C	A
CX425::[CX425]	CX425		ind1B	11	C	G	G	G	C	C	A	A	C	A	G	G	T	G	T	C	G	G	A	C	T	G	C	A	G	G	T	G	T	C	C	A	T	T	G	C	C	G	A	T	T	C	T	C	A
IR66897B::[CX43]	CX43	IRGC 135931	ind1B	11	C	G	G	G	C	C	A	A	C	A	G	G	T	G	T	C	G	G	A	C	T	G	C	A	G	G	T	G	T	C	C	A	T	T	G	C	C	G	A	T	T	C	T	C	A
DUOXI 1::[CX431]	CX431		indx	11	C	G	G	G	C	C	A	A	C	A	G	G	T	G	T	C	G	G	A	C	T	G	C	A	G	G	T	G	T	C	C	A	T	T	G	C	C	G	A	T	T	C	T	C	A
IR58025B::[CX44]	CX44	IRGC 135925	ind1B	11	C	G	G	G	C	C	A	A	C	A	G	G	T	G	T	C	G	G	A	C	T	G	C	A	G	G	T	G	T	C	C	A	T	T	G	C	C	G	A	T	T	C	T	C	A
DHAN4::[CX45]	CX45	IRGC 135877	ind1B	11	C	G	G	G	C	C	A	A	C	A	G	G	T	G	T	C	G	G	A	C	T	G	C	A	G	G	T	G	T	C	C	A	T	T	G	C	C	G	A	T	T	C	T	C	A
PT60::[CX48]	CX48		indx	11	C	G	G	G	C	C	A	A	C	A	G	G	T	G	T	C	G	G	A	C	T	G	C	A	G	G	T	G	T	C	C	A	T	T	G	C	C	G	A	T	T	C	T	C	A
JIANGXISIMIAO::[CX53]	CX53	IRGC 135954	indx	11	C	G	G	G	C	C	A	A	C	A	G	G	T	G	T	C	G	G	A	C	T	G	C	A	G	G	T	G	T	C	C	A	T	T	G	C	C	G	A	T	T	C	T	C	A
TONGNIAN 1::[CX534]	CX534	IRGC 136059	temp	11	C	G	G	G	C	C	A	A	C	A	G	G	T	G	T	C	G	G	A	C	T	G	C	A	G	G	T	G	T	C	C	A	T	T	G	C	C	G	A	T	T	C	T	C	A
LINYITANGDAO::[CX54]	CX54		indx	11	C	G	G	G	C	C	A	A	C	A	G	G	T	G	T	C	G	G	A	C	T	G	C	A	G	G	T	G	T	C	C	A	T	T	G	C	C	G	A	T	T	C	T	C	A
PENGSHANTIEGANZHAN::[CX55]	CX55		ind1A	11	C	G	G	G	C	C	A	A	C	A	G	G	T	G	T	C	G	G	A	C	T	G	C	A	G	G	T	G	T	C	C	A	T	T	G	C	C	G	A	T	T	C	T	C	A
CX561::[CX561]	CX561		ind1B	11	C	G	G	G	C	C	A	A	C	A	G	G	T	G	T	C	G	G	A	C	T	G	C	A	G	G	T	G	T	C	C	A	T	T	G	C	C	G	A	T	T	C	T	C	A
ZHONGCHAO 123::[CX57]	CX57		temp	11	C	G	G	G	C	C	A	A	C	A	G	G	T	G	T	C	G	G	A	C	T	G	C	A	G	G	T	G	T	C	C	A	T	T	G	C	C	G	A	T	T	C	T	C	A
GIZA159::[CX58]	CX58	IRGC 135895	temp	11	C	G	G	G	C	C	A	A	C	A	G	G	T	G	T	C	G	G	A	C	T	G	C	A	G	G	T	G	T	C	C	A	T	T	G	C	C	G	A	T	T	C	T	C	A
C418::[CX6]	CX6		admix	11	C	G	G	G	C	C	A	A	C	A	G	G	T	G	T	C	G	G	A	C	T	G	C	A	G	G	T	G	T	C	C	A	T	T	G	C	C	G	A	T	T	C	T	C	A
IRAT 352::[CX64]	CX64	IRGC 135943	ind3	11	C	G	G	G	C	C	A	A	C	A	G	G	T	G	T	C	G	G	A	C	T	G	C	A	G	G	T	G	T	C	C	A	T	T	G	C	C	G	A	T	T	C	T	C	A
IR6::[CX73]	CX73	IRGC 135927	ind1B	11	C	G	G	G	C	C	A	A	C	A	G	G	T	G	T	C	G	G	A	C	T	G	C	A	G	G	T	G	T	C	C	A	T	T	G	C	C	G	A	T	T	C	T	C	A
CHENGHUI 448::[CX8]	CX8		indx	11	C	G	G	G	C	C	A	A	C	A	G	G	T	G	T	C	G	G	A	C	T	G	C	A	G	G	T	G	T	C	C	A	T	T	G	C	C	G	A	T	T	C	T	C	A
OM1706::[CX80]	CX80	IRGC 136014	ind1B	11	C	G	G	G	C	C	A	A	C	A	G	G	T	G	T	C	G	G	A	C	T	G	C	A	G	G	T	G	T	C	C	A	T	T	G	C	C	G	A	T	T	C	T	C	A
X21::[CX82]	CX82	IRGC 136073	ind1B	11	C	G	G	G	C	C	A	A	C	A	G	G	T	G	T	C	G	G	A	C	T	G	C	A	G	G	T	G	T	C	C	A	T	T	G	C	C	G	A	T	T	C	T	C	A
X22::[CX83]	CX83	IRGC 136074	ind1B	11	C	G	G	G	C	C	A	A	C	A	G	G	T	G	T	C	G	G	A	C	T	G	C	A	G	G	T	G	T	C	C	A	T	T	G	C	C	G	A	T	T	C	T	C	A
X23::[CX84]	CX84	IRGC 136075	indx	11	C	G	G	G	C	C	A	A	C	A	G	G	T	G	T	C	G	G	A	C	T	G	C	A	G	G	T	G	T	C	C	A	T	T	G	C	C	G	A	T	T	C	T	C	A
C71::[CX85]	CX85		indx	11	C	G	G	G	C	C	A	A	C	A	G	G	T	G	T	C	G	G	A	C	T	G	C	A	G	G	T	G	T	C	C	A	T	T	G	C	C	G	A	T	T	C	T	C	A
C70::[CX86]	CX86		indx	11	C	G	G	G	C	C	A	A	C	A	G	G	T	G	T	C	G	G	A	C	T	G	C	A	G	G	T	G	T	C	C	A	T	T	G	C	C	G	A	T	T	C	T	C	A
Q5::[CX87]	CX87	IRGC 136027	indx	11	C	G	G	G	C	C	A	A	C	A	G	G	T	G	T	C	G	G	A	C	T	G	C	A	G	G	T	G	T	C	C	A	T	T	G	C	C	G	A	T	T	C	T	C	A
FENGAIZHAN::[CX9]	CX9		ind1B	10	C	G	G	G	C	C	A	A	C	A	G	G	T	G	T	C	G	G	A	C	T	G	C	A	G	G	T	G	T	C	C	A	T	T	G	C	C	G	A	T	T	C	T	C	A
CHHOMROMG::[CX90]	CX90	IRGC 135863	ind1B	11	C	G	G	G	C	C	A	A	C	A	G	G	T	G	T	C	G	G	A	C	T	G	C	A	G	G	T	G	T	C	C	A	T	T	G	C	C	G	A	T	T	C	T	C	A
UPR 191-66::[CX92]	CX92	IRGC 136063	ind1B	11	C	G	G	G	C	C	A	A	C	A	G	G	T	G	T	C	G	G	A	C	T	G	C	A	G	G	T	G	T	C	C	A	T	T	G	C	C	G	A	T	T	C	T	C	A
SWARNA::[CX94]	CX94	IRGC 117278	indx	11	C	G	G	G	C	C	A	A	C	A	G	G	T	G	T	C	G	G	A	C	T	G	C	A	G	G	T	G	T	C	C	A	T	T	G	C	C	G	A	T	T	C	T	C	A
BUDDA::[CX97]	CX97	IRGC 135851	ind1B	11	C	G	G	G	C	C	A	A	C	A	G	G	T	G	T	C	G	G	A	C	T	G	C	A	G	G	T	G	T	C	C	A	T	T	G	C	C	G	A	T	T	C	T	C	A
DODDABYRANELLA::[CX98]	CX98	IRGC 135882	ind2	11	C	G	G	G	C	C	A	A	C	A	G	G	T	G	T	C	G	G	A	C	T	G	C	A	G	G	T	G	T	C	C	A	T	T	G	C	C	G	A	T	T	C	T	C	A
SUWEON 311::IRGC 61890-1::[IRIS 313-10000]	IRIS 313-10000	IRGC 125907	ind1B	11	C	G	G	G	C	C	A	A	C	A	G	G	T	G	T	C	G	G	A	C	T	G	C	A	G	G	T	G	T	C	C	A	T	T	G	C	C	G	A	T	T	C	T	C	A
C 662083::IRGC 62101-1::[IRIS 313-10001]	IRIS 313-10001	IRGC 125692	ind1B	11	C	G	G	G	C	C	A	A	C	A	G	G	T	G	T	C	G	G	A	C	T	G	C	A	G	G	T	G	T	C	C	A	T	T	G	C	C	G	A	T	T	C	T	C	A
SANT ANDREA::IRGC 65732-1::[IRIS 313-10014]	IRIS 313-10014	IRGC 125898	temp	11	C	G	G	G	C	C	A	A	C	A	G	G	T	G	T	C	G	G	A	C	T	G	C	A	G	G	T	G	T	C	C	A	T	T	G	C	C	G	A	T	T	C	T	C	A
BOHOTO BALOOCHESTAN::IRGC 66237-1::[IRIS 313-10016]	IRIS 313-10016	IRGC 125954	indx	11	C	G	G	G	C	C	A	A	C	A	G	G	T	G	T	C	G	G	A	C	T	G	C	A	G	G	T	G	T	C	C	A	T	T	G	C	C	G	A	T	T	C	T	C	A
CHAMA (DWARF)::IRGC 69487-1::[IRIS 313-10046]	IRIS 313-10046	IRGC 125958	ind1B	11	C	G	G	G	C	C	A	A	C	A	G	G	T	G	T	C	G	G	A	C	T	G	C	A	G	G	T	G	T	C	C	A	T	T	G	C	C	G	A	T	T	C	T	C	A
TSIMATAHOPAOSA::IRGC 69884-1::[IRIS 313-10050]	IRIS 313-10050	IRGC 127091	indx	11	C	G	G	G	C	C	A	A	C	A	G	G	T	G	T	C	G	G	A	C	T	G	C	A	G	G	T	G	T	C	C	A	T	T	G	C	C	G	A	T	T	C	T	C	A
DACHEONGBYEO::IRGC 72533-1::[IRIS 313-10059]	IRIS 313-10059	IRGC 125717	temp	11	C	G	G	G	C	C	A	A	C	A	G	G	T	G	T	C	G	G	A	C	T	G	C	A	G	G	T	G	T	C	C	A	T	T	G	C	C	G	A	T	T	C	T	C	A
KALIN::IRGC 77312-1::[IRIS 313-10089]	IRIS 313-10089	IRGC 125791	temp	11	C	G	G	G	C	C	A	A	C	A	G	G	T	G	T	C	G	G	A	C	T	G	C	A	G	G	T	G	T	C	C	A	T	T	G	C	C	G	A	T	T	C	T	C	A
MAEKJO::IRGC 77666-1::[IRIS 313-10097]	IRIS 313-10097	IRGC 125830	temp	11	C	G	G	G	C	C	A	A	C	A	G	G	T	G	T	C	G	G	A	C	T	G	C	A	G	G	T	G	T	C	C	A	T	T	G	C	C	G	A	T	T	C	T	C	A
DALSUNG 41::IRGC 79385-1::[IRIS 313-10103]	IRIS 313-10103	IRGC 125721	indx	11	C	G	G	G	C	C	A	A	C	A	G	G	T	G	T	C	G	G	A	C	T	G	C	A	G	G	T	G	T	C	C	A	T	T	G	C	C	G	A	T	T	C	T	C	A
EX EBOKOZURU::IRGC 79912-1::[IRIS 313-10109]	IRIS 313-10109	IRGC 125735	ind3	11	C	G	G	G	C	C	A	A	C	A	G	G	T	G	T	C	G	G	A	C	T	G	C	A	G	G	T	G	T	C	C	A	T	T	G	C	C	G	A	T	T	C	T	C	A
MOLO::IRGC 81603-1::[IRIS 313-10111]	IRIS 313-10111	IRGC 125843	japx	11	C	G	G	G	C	C	A	A	C	A	G	G	T	G	T	C	G	G	A	C	T	G	C	A	G	G	T	G	T	C	C	A	T	T	G	C	C	G	A	T	T	C	T	C	A
EX FOILAEIN (NAPUTO)::IRGC 81675-1::[IRIS 313-10113]	IRIS 313-10113	IRGC 125736	indx	11	C	G	G	G	C	C	A	A	C	A	G	G	T	G	T	C	G	G	A	C	T	G	C	A	G	G	T	G	T	C	C	A	T	T	G	C	C	G	A	T	T	C	T	C	A
GITANO::IRGC 82424-1::[IRIS 313-10119]	IRIS 313-10119	IRGC 125752	japx	11	C	G	G	G	C	C	A	A	C	A	G	G	T	G	T	C	G	G	A	C	T	G	C	A	G	G	T	G	T	C	C	A	T	T	G	C	C	G	A	T	T	C	T	C	A
SAN SHIH TSI::IRGC 1038-1::[IRIS 313-10129]	IRIS 313-10129	IRGC 125897	ind1A	11	C	G	G	G	C	C	A	A	C	A	G	G	T	G	T	C	G	G	A	C	T	G	C	A	G	G	T	G	T	C	C	A	T	T	G	C	C	G	A	T	T	C	T	C	A
RD 15::IRGC 47705-1::[IRIS 313-10151]	IRIS 313-10151	IRGC 126003	ind3	10.5	C	G	G	G	C	C	A	A	C	A	G	G	T	G	T	C	G	G	A	C	T	G	C	A	G	G	C/T	G	T	C	C	A	T	T	G	C	C	G	A	T	T	C	T	C	A
HE GU TSAO::IRGC 51302-1::[IRIS 313-10154]	IRIS 313-10154	IRGC 125760	ind1A	11	C	G	G	G	C	C	A	A	C	A	G	G	T	G	T	C	G	G	A	C	T	G	C	A	G	G	T	G	T	C	C	A	T	T	G	C	C	G	A	T	T	C	T	C	A
BR IRGA 409::IRGC 55915-1::[IRIS 313-10161]	IRIS 313-10161	IRGC 125691	ind1B	11	C	G	G	G	C	C	A	A	C	A	G	G	T	G	T	C	G	G	A	C	T	G	C	A	G	G	T	G	T	C	C	A	T	T	G	C	C	G	A	T	T	C	T	C	A
MEI FENG 9::IRGC 63735-1::[IRIS 313-10168]	IRIS 313-10168	IRGC 125836	indx	11	C	G	G	G	C	C	A	A	C	A	G	G	T	G	T	C	G	G	A	C	T	G	C	A	G	G	T	G	T	C	C	A	T	T	G	C	C	G	A	T	T	C	T	C	A
MIN ZAO 6::IRGC 63772-1::[IRIS 313-10170]	IRIS 313-10170	IRGC 125842	ind1A	11	C	G	G	G	C	C	A	A	C	A	G	G	T	G	T	C	G	G	A	C	T	G	C	A	G	G	T	G	T	C	C	A	T	T	G	C	C	G	A	T	T	C	T	C	A
YA NONG ZAO 4::IRGC 63908-1::[IRIS 313-10171]	IRIS 313-10171	IRGC 125944	ind1A	12	C	G	G	G	C	C	A	A	C	A	G	G	T	G	T	C	G	G	A	C	T	G	C	A	G	G	T	G	T	C	C	A	T	T	G	C	C	G	A	T	T	C	T	C	A
DA GANG ZHAN::IRGC 67103-1::[IRIS 313-10177]	IRIS 313-10177	IRGC 125719	indx	11	C	G	G	G	C	C	A	A	C	A	G	G	T	G	T	C	G	G	A	C	T	G	C	A	G	G	T	G	T	C	C	A	T	T	G	C	C	G	A	T	T	C	T	C	A
GAO JIAO BAI::IRGC 68047-1::[IRIS 313-10178]	IRIS 313-10178	IRGC 125748	ind1A	11	C	G	G	G	C	C	A	A	C	A	G	G	T	G	T	C	G	G	A	C	T	G	C	A	G	G	T	G	T	C	C	A	T	T	G	C	C	G	A	T	T	C	T	C	A
DENG DENG QI::IRGC 72036-1::[IRIS 313-10190]	IRIS 313-10190	IRGC 125726	ind1A	11	C	G	G	G	C	C	A	A	C	A	G	G	T	G	T	C	G	G	A	C	T	G	C	A	G	G	T	G	T	C	C	A	T	T	G	C	C	G	A	T	T	C	T	C	A
MIN KE ZHAN::IRGC 72230-1::[IRIS 313-10191]	IRIS 313-10191	IRGC 125841	ind1A	11	C	G	G	G	C	C	A	A	C	A	G	G	T	G	T	C	G	G	A	C	T	G	C	A	G	G	T	G	T	C	C	A	T	T	G	C	C	G	A	T	T	C	T	C	A
BAI HE::IRGC 76438-1::[IRIS 313-10211]	IRIS 313-10211	IRGC 125669	ind1A	11	C	G	G	G	C	C	A	A	C	A	G	G	T	G	T	C	G	G	A	C	T	G	C	A	G	G	T	G	T	C	C	A	T	T	G	C	C	G	A	T	T	C	T	C	A
EPEAL 102::IRGC 78698-1::[IRIS 313-10220]	IRIS 313-10220	IRGC 126203	indx	11	C	G	G	G	C	C	A	A	C	A	G	G	T	G	T	C	G	G	A	C	T	G	C	A	G	G	T	G	T	C	C	A	T	T	G	C	C	G	A	T	T	C	T	C	A
BA BAI GU::IRGC 79580-1::[IRIS 313-10221]	IRIS 313-10221	IRGC 125663	indx	11	C	G	G	G	C	C	A	A	C	A	G	G	T	G	T	C	G	G	A	C	T	G	C	A	G	G	T	G	T	C	C	A	T	T	G	C	C	G	A	T	T	C	T	C	A
HUA LI ZAO::IRGC 80950-1::[IRIS 313-10224]	IRIS 313-10224	IRGC 125766	ind1A	11	C	G	G	G	C	C	A	A	C	A	G	G	T	G	T	C	G	G	A	C	T	G	C	A	G	G	T	G	T	C	C	A	T	T	G	C	C	G	A	T	T	C		C	A
TONG GU HONG::IRGC 81026-1::[IRIS 313-10226]	IRIS 313-10226	IRGC 125925	indx	11	C	G	G	G	C	C	A	A	C	A	G	G	T	G	T	C	G	G	A	C	T	G	C	A	G	G	T	G	T	C	C	A	T	T	G	C	C	G	A	T	T	C	T	C	A
PSBRC 86::IRGC 99716-1::[IRIS 313-10237]	IRIS 313-10237		ind1B	11	C	G	G	G	C	C	A	A	C	A	G	G	T	G	T	C	G	G	A	C	T	G	C	A	G	G	T	G	T	C	C	A	T	T	G	C	C	G	A	T	T	C	T	C	A
PSBRC 88::IRGC 99717-1::[IRIS 313-10238]	IRIS 313-10238	IRGC 125876	ind1B	11	C	G	G	G	C	C	A	A	C	A	G	G	T	G	T	C	G	G	A	C	T	G	C	A	G	G	T	G	T	C	C	A	T	T	G	C	C	G	A	T	T	C	T	C	A
LIU XU::IRGC 109232-1::[IRIS 313-10239]	IRIS 313-10239	IRGC 125827	indx	11	C	G	G	G	C	C	A	A	C	A	G	G	T	G	T	C	G	G	A	C	T	G	C	A	G	G	T	G	T	C	C	A	T	T	G	C	C	G	A	T	T	C	T	C	A
H 305-84::IRGC 116988-1::[IRIS 313-10242]	IRIS 313-10242	IRGC 127074	temp	11	C	G	G	G	C	C	A	A	C	A	G	G	T	G	T	C	G	G	A	C	T	G	C	A	G	G	T	G	T	C	C	A	T	T	G	C	C	G	A	T	T	C	T	C	A
AMISTAD 82::IRGC 116954-1::[IRIS 313-10247]	IRIS 313-10247	IRGC 125949	ind1B	11	C	G	G	G	C	C	A	A	C	A	G	G	T	G	T	C	G	G	A	C	T	G	C	A	G	G	T	G	T	C	C	A	T	T	G	C	C	G	A	T	T	C	T	C	A
ALTAMIRA 9::IRGC 116953-1::[IRIS 313-10257]	IRIS 313-10257	IRGC 127031	indx	11	C	G	G	G	C	C	A	A	C	A	G	G	T	G	T	C	G	G	A	C	T	G	C	A	G	G	T	G	T	C	C	A	T	T	G	C	C	G	A	T	T	C	T	C	A
CEA 3::IRGC 116965-1::[IRIS 313-10260]	IRIS 313-10260	IRGC 125957	indx	11	C	G	G	G	C	C	A	A	C	A	G	G	T	G	T	C	G	G	A	C	T	G	C	A	G	G	T	G	T	C	C	A	T	T	G	C	C	G	A	T	T	C	T	C	A
FONAIAP 2::IRGC 116985-1::[IRIS 313-10268]	IRIS 313-10268	IRGC 127072	indx	11	C	G	G	G	C	C	A	A	C	A	G	G	T	G	T	C	G	G	A	C	T	G	C	A	G	G	T	G	T	C	C	A	T	T	G	C	C	G	A	T	T	C	T	C	A
IA CUBA 17::IRGC 116990-1::[IRIS 313-10271]	IRIS 313-10271	IRGC 125966	indx	11	C	G	G	G	C	C	A	A	C	A	G	G	T	G	T	C	G	G	A	C	T	G	C	A	G	G	T	G	T	C	C	A	T	T	G	C	C	G	A	T	T	C	T	C	A
JUMA 62::IRGC 117011-1::[IRIS 313-10279]	IRIS 313-10279	IRGC 126066	indx	11	C	G	G	G	C	C	A	A	C	A	G	G	T	G	T	C	G	G	A	C	T	G	C	A	G	G	T	G	T	C	C	A	T	T	G	C	C	G	A	T	T	C	T	C	A
UQUIHUA::IRGC 117037-1::[IRIS 313-10287]	IRIS 313-10287	IRGC 127068	ind1B	11	C	G	G	G	C	C	A	A	C	A	G	G	T	G	T	C	G	G	A	C	T	G	C	A	G	G	T	G	T	C	C	A	T	T	G	C	C	G	A	T	T	C	T	C	A
IR 21015-72-3-3-3-1::IRGC 117004-1::[IRIS 313-10294]	IRIS 313-10294	IRGC 125972	indx	11	C	G	G	G	C	C	A	A	C	A	G	G	T	G	T	C	G	G	A	C	T	G	C	A	G	G	T	G	T	C	C	A	T	T	G	C	C	G	A	T	T	C	T	C	A
3210::IRGC 116950-1::[IRIS 313-10298]	IRIS 313-10298	IRGC 127030	ind1B	11	C	G	G	G	C	C	A	A	C	A	G	G	T	G	T	C	G	G	A	C	T	G	C	A	G	G	T	G	T	C	C	A	T	T	G	C	C	G	A	T	T	C	T	C	A
IRGA 959-1-2-2F-4-1-4A-6-CA-6X::IRGC 117006-1::[IRIS 313-10301]	IRIS 313-10301	IRGC 126064	indx	11	C	G	G	G	C	C	A	A	C	A	G	G	T	G	T	C	G	G	A	C	T	G	C	A	G	G	T	G	T	C	C	A	T	T	G	C	C	G	A	T	T	C	T	C	A
INIAP 10::IRGC 117000-1::[IRIS 313-10314]	IRIS 313-10314	IRGC 125969	indx	11	C	G	G	G	C	C	A	A	C	A	G	G	T	G	T	C	G	G	A	C	T	G	C	A	G	G	T	G	T	C	C	A	T	T	G	C	C	G	A	T	T	C	T	C	A
CAROLINO BLANCO::IRGC 117249-1::[IRIS 313-10327]	IRIS 313-10327	IRGC 127042	trop	11	C	G	G	G	C	C	A	A	C	A	G	G	T	G	T	C	G	G	A	C	T	G	C	A	G	G	T	G	T	C	C	A	T	T	G	C	C	G	A	T	T	C	T	C	A
B 4414 F-MR-6-3::IRGC 117310-1::[IRIS 313-10332]	IRIS 313-10332	IRGC 126044	indx	11	C	G	G	G	C	C	A	A	C	A	G	G	T	G	T	C	G	G	A	C	T	G	C	A	G	G	T	G	T	C	C	A	T	T	G	C	C	G	A	T	T		T	C	A
B 6149 F-MR-7::IRGC 117314-1::[IRIS 313-10337]	IRIS 313-10337	IRGC 125953	indx	11	C	G	G	G	C	C	A	A	C	A	G	G	T	G	T	C	G	G	A	C	T	G	C	A	G	G	T	G	T	C	C	A	T	T	G	C	C	G	A	T	T	C	T	C	A
BR 4973-34-6-6::IRGC 117317-1::[IRIS 313-10340]	IRIS 313-10340	IRGC 127040	indx	11	C	G	G	G	C	C	A	A	C	A	G	G	T	G	T	C	G	G	A	C	T	G	C	A	G	G	T	G	T	C	C	A	T	T	G	C	C	G	A	T	T	C	T	C	A
HP 3319-2WX-6-4-1-B::IRGC 117331-1::[IRIS 313-10353]	IRIS 313-10353	IRGC 127049	indx	11	C	G	G	G	C	C	A	A	C	A	G	G	T	G	T	C	G	G	A	C	T	G	C	A	G	G	T	G	T	C	C	A	T	T	G	C	C	G	A	T	T	C	T	C	A
IR 63295-AC 209-7::IRGC 117365-1::[IRIS 313-10361]	IRIS 313-10361	IRGC 127053	indx	11	C	G	G	G	C	C	A	A	C	A	G	G	T	G	T	C	G	G	A	C	T	G	C	A	G	G	T	G	T	C	C	A	T	T	G	C	C	G	A	T	T	C	T	C	A
IR 68333-R-R-B-19::IRGC 117381-1::[IRIS 313-10373]	IRIS 313-10373	IRGC 126027	temp	11	C	G	G	G	C	C	A	A	C	A	G	G	T	G	T	C	G	G	A	C	T	G	C	A	G	G	T	G	T	C	C	A	T	T	G	C	C	G	A	T	T	C	T	C	A
IR 75870-5-8-5-B-1::IRGC 117297-1::[IRIS 313-10385]	IRIS 313-10385	IRGC 126062	ind1B	11	C	G	G	G	C	C	A	A	C	A	G	G	T	G	T	C	G	G	A	C	T	G	C	A	G	G	T	G	T	C	C	A	T	T	G	C	C	G	A	T	T	C	T	C	A
IR 80340-23-B-12-6-B::IRGC 117309-1::[IRIS 313-10396]	IRIS 313-10396	IRGC 125987	indx	11	C	G	G	G	C	C	A	A	C	A	G	G	T	G	T	C	G	G	A	C	T	G	C	A	G	G	T	G	T	C	C	A	T	T	G	C	C	G	A	T	T	C	T	C	A
IRGA 318-11-9-2A::IRGC 117340-1::[IRIS 313-10398]	IRIS 313-10398	IRGC 126030	ind1B	11	C	G	G	G	C	C	A	A	C	A	G	G	T	G	T	C	G	G	A	C	T	G	C	A	G	G	T	G	T	C	C	A	T	T	G	C	C	G	A	T	T	C	T	C	A
IRGA 370-38-1-1F-C4-2::IRGC 117342-1::[IRIS 313-10400]	IRIS 313-10400	IRGC 125988	ind1B	11	C	G	G	G	C	C	A	A	C	A	G	G	T	G	T	C	G	G	A	C	T	G	C	A	G	G	T	G	T	C	C	A	T	T	G	C	C	G	A	T	T	C	T	C	A
IRGA 659-1-2-2-2::IRGC 117345-1::[IRIS 313-10403]	IRIS 313-10403	IRGC 120993	indx	9.5	C	G	G	G	C	C	A	A	C	A	G	G	T	G	T	C	G	G	A	C	T	G	C	A	G	G	T	G	T	C	C	A	T	T	G	C	C	G	A	T	T	C	T	C	A
K 479-2-3::IRGC 117346-1::[IRIS 313-10404]	IRIS 313-10404	IRGC 121003	indx	12	C	G	G	G	C	C	A	A	C	A	G	G	T	G	T	C	G	G	A	C	T	G	C	A	G	G	T	G	T	C	C	A	T	T	G	C	C	G	A	T	T	C	T	C	A
GINMASARI::IRGC 242-1::[IRIS 313-10430]	IRIS 313-10430	IRGC 128299	temp	11	C	G	G	G	C	C	A	A	C	A	G	G	T	G	T	C	G	G	A	C	T	G	C	A	G	G	T	G	T	C	C	A	T	T	G	C	C	G	A	T	T	C	T	C	A
NORIN 21::IRGC 493-1::[IRIS 313-10437]	IRIS 313-10437	IRGC 128409	temp	11	C	G	G	G	C	C	A	A	C	A	G	G	T	G	T	C	G	G	A	C	T	G	C	A	G	G	T	G	T	C	C	A	T	T	G	C	C	G	A	T	T	C	T	C	A
CI 7061::IRGC 968-1::[IRIS 313-10449]	IRIS 313-10449	IRGC 128264	ind1A	12	C	G	G	G	C	C	A	A	C	A	G	G	T	G	T	C	G	G	A	C	T	G	C	A	G	G	T	G	T	C	C	A	T	T	G	C	C	G	A	T	T	C	T	C	A
CHAN KU::IRGC 1069-1::[IRIS 313-10450]	IRIS 313-10450	IRGC 127258	ind1A	11	C	G	G	G	C	C	A	A	C	A	G	G	T	G	T	C	G	G	A	C	T	G	C	A	G	G	T	G	T	C	C	A	T	T	G	C	C	G	A	T	T	C	T	C	A
LING TA 150::IRGC 1106-1::[IRIS 313-10452]	IRIS 313-10452	IRGC 127565	ind1A	11	C	G	G	G	C	C	A	A	C	A	G	G	T	G	T	C	G	G	A	C	T	G	C	A	G	G	T	G	T	C	C	A	T	T	G	C	C	G	A	T	T	C	T	C	A
LU TAO 2::IRGC 1175-1::[IRIS 313-10453]	IRIS 313-10453	IRGC 128371	japx	11	C	G	G	G	C	C	A	A	C	A	G	G	T	G	T	C	G	G	A	C	T	G	C	A	G	G	T	G	T	C	C	A	T	T	G	C	C	G	A	T	T	C	T	C	A
P 168::IRGC 1354-1::[IRIS 313-10458]	IRIS 313-10458	IRGC 127695	ind1A	11	C	G	G	G	C	C	A	A	C	A	G	G	T	G	T	C	G	G	A	C	T	G	C	A	G	G	T	G	T	C	C	A	T	T	G	C	C	G	A	T	T	C	T	C	A
RUSTY LATE::IRGC 3506-1::[IRIS 313-10477]	IRIS 313-10477	IRGC 128454	indx	11	C	G	G	G	C	C	A	A	C	A	G	G	T	G	T	C	G	G	A	C	T	G	C	A	G	G	T	G	T	C	C	A	T	T	G	C	C	G	A	T	T	C	T	C	A
CE IN TSAN::IRGC 4362-1::[IRIS 313-10497]	IRIS 313-10497	IRGC 127249	ind1A	11	C	G	G	G	C	C	A	A	C	A	G	G	T	G	T	C	G	G	A	C	T	G	C	A	G	G	T	G	T	C	C	A	T	T	G	C	C	G	A	T	T	C	T	C	A
HA GOO::IRGC 4577-1::[IRIS 313-10503]	IRIS 313-10503	IRGC 127398	ind1A	12	C	G	G	G	C	C	A	A	C	A	G	G	T	G	T	C	G	G	A	C	T	G	C	A	G	G	T	G	T	C	C	A	T	T	G	C	C	G	A	T	T	C	T	C	A
AMBARIKORI::IRGC 5132-1::[IRIS 313-10509]	IRIS 313-10509	IRGC 127120	ind3	11	C	G	G	G	C	C	A	A	C	A	G	G	T	G	T	C	G	G	A	C	T	G	C	A	G	G	T	G	T	C	C	A	T	T	G	C	C	G	A	T	T	C	T	C	A
MAGSIING::IRGC 5211-1::[IRIS 313-10510]	IRIS 313-10510	IRGC 127589	indx	11	C	G	G	G	C	C	A	A	C	A	G	G	T	G	T	C		G	A	C	T	G	C	A	G	G	T	G	T	C	C	A	T	T	G	C	C	G	A	T	T	C	T	C	A
MACAN SAPAC::IRGC 5212-2::[IRIS 313-10511]	IRIS 313-10511	IRGC 128101	ind3	11	C	G	G	G	C	C	A	A	C	A	G	G	T	G	T	C	G	G	A	C	T	G	C	A	G	G	T	G	T	C	C	A	T	T	G	C	C	G	A	T	T	C	T	C	A
TAICHUNG WOO GEN 2::IRGC 5525-1::[IRIS 313-10515]	IRIS 313-10515	IRGC 127836	ind1A	11	C	G	G	G	C	C	A	A	C	A	G	G	T	G	T	C	G	G	A	C	T	G	C	A	G	G	T	G	T	C	C	A	T	T	G	C	C	G	A	T	T	C	T	C	A
SIPOT::IRGC 5825-1::[IRIS 313-10517]	IRIS 313-10517	IRGC 127812	ind3	11	C	G	G	G	C	C	A	A	C	A	G	G	T	G	T	C	G	G	A	C	T	G	C	A	G	G	T	G	T	C	C	A	T	T	G	C	C	G	A	T	T	C	T	C	A
KHAO BAI SRI::IRGC 6110-2::[IRIS 313-10524]	IRIS 313-10524		ind3	11	C	G	G	G	C	C	A	A	C	A	G	G	T	G	T	C	G	G	A	C	T	G	C	A	G	G	T	G	T	C	C	A	T	T	G	C	C	G	A	T	T	C	T	C	A
BANDANG PUTIH 680::IRGC 6133-2::[IRIS 313-10525]	IRIS 313-10525	IRGC 132246	ind3	11	C	G	G	G	C	C	A	A	C	A	G	G	T	G	T	C	G	G	A	C	T	G	C	A	G	G	T	G	T	C	C	A	T	T	G	C	C	G	A	T	T	C	T	C	A
D 204-1::IRGC 6445-1::[IRIS 313-10534]	IRIS 313-10534	IRGC 127290	aus	11	C	G	G	G	C	C	A	A	C	A	G	G	T	G	T	C	G	G	A	C	T	G	C	A	G	G	T	G	T	C	C	A	T	T	G	C	C	G	A	T	T	C	T	C	A
IACA ESCURO::IRGC 6636-1::[IRIS 313-10541]	IRIS 313-10541	IRGC 131990	trop	11	C	G	G	G	C	C	A	A	C	A	G	G	T	G	T	C	G	G	A	C	T	G	C	A	G	G	T	G	T	C	C	A	T	T	G	C	C	G	A	T	T	C	T	C	A
BONG SEN::IRGC 7011-1::[IRIS 313-10554]	IRIS 313-10554	IRGC 127235	ind3	12	C	G	G	G	C		A	A	C	A	G	G	T	G	T	C	G	G	A	C	T	G	C	A	G	G	T	G	T	C	C	A	T	T	G	C	C	G	A	T	T	C	T	C	A
TA PAI MAUNG::IRGC 7292-1::[IRIS 313-10560]	IRIS 313-10560	IRGC 127848	ind1A	11	C	G	G	G	C	C	A	A	C	A	G	G	T	G	T	C	G	G	A	C	T	G	C	A	G	G	T	G	T	C	C	A	T	T	G	C	C	G	A	T	T	C	T	C	A
NAN TEO 14::IRGC 7304-1::[IRIS 313-10561]	IRIS 313-10561	IRGC 127645	ind1A	12	C	G	G	G	C	C	A	A	C	A	G	G	T	G	T	C	G	G	A	C	T	G	C	A	G	G	T	G	T	C	C	A	T	T	G	C	C	G	A	T	T	C	T	C	A
CHUSEI HONEN::IRGC 7777-1::[IRIS 313-10570]	IRIS 313-10570	IRGC 128263	temp	11	C	G	G	G	C	C	A	A	C	A	G	G	T	G	T	C	G	G	A	C	T	G	C	A	G	G	T	G	T	C	C	A	T	T	G	C	C	G	A	T	T	C	T	C	A
TSAO SIAO PEH TAO::IRGC 8265-2::[IRIS 313-10583]	IRIS 313-10583	IRGC 128194	temp	11	C	G	G	G	C	C	A	A	C	A	G	G	T	G	T	C	G	G	A	C	T	G	C	A	G	G	T	G	T	C	C	A	T	T	G	C	C	G	A	T	T	C	T	C	A
DD 126::IRGC 8667-1::[IRIS 313-10598]	IRIS 313-10598	IRGC 128273	aus	11	C	G	G	G	C	C	A	A	C	A	G	G	T	G	T	C	G	G	A	C	T	G	C	A	G	G	T	G	T	C	C	A	T	T	G	C	C	G	A	T	T	C	T	C	A
UCP 122::IRGC 8794-1::[IRIS 313-10603]	IRIS 313-10603	IRGC 127871	aus	11	C	G	G	G	C	C	A	A	C	A	G	G	T	G	T	C	G	G	A	C	T	G	C	A	G	G	T	G	T	C	C	A	T	T	G	C	C	G	A	T	T	C	T	C	A
LEP HED::IRGC 11917-1::[IRIS 313-10660]	IRIS 313-10660	IRGC 128360	subtrop	11	C	G	G	G	C	C	A	A	C	A	G	G	T	G	T	C	G	G	A	C	T	G	C	A	G	G	T	G	T	C	C	A	T	T	G	C	C	G	A	T	T	C	T	C	A
ARC 6052::IRGC 12196-1::[IRIS 313-10664]	IRIS 313-10664	IRGC 127163	ind2	11	C	G	G	G	C	C	A	A	C	A	G	G	T	G	T	C	G	G	A	C	T	G	C	A	G	G	T	G	T	C	C	A	T	T	G	C	C	G	A	T	T	C	T	C	A
ARC 10581::IRGC 12514-1::[IRIS 313-10671]	IRIS 313-10671	IRGC 127128	indx	12.5	C	G	G	G	C	C	A	A	C	A	G	G	T	G	T	C	G	G	A	C	T	G	C	A	G	G	T	G	T	C	C	A	T	T	G	C	C	G	A	T	T	C	T	C	A
ARC 10905::IRGC 12669-1::[IRIS 313-10675]	IRIS 313-10675	IRGC 127132	indx	12	C	G	G	G	C	C	A	A	C	A	G	G	T	G	T	C	G	G	A	C	T	G	C	A	G	G	T	G	T	C	C	A	T	T	G	C	C	G	A	T	T	C	T	C	A
PADI PULUT::IRGC 13444-1::[IRIS 313-10687]	IRIS 313-10687		ind3	11	C	G	G	G	C	C	A	A	C	A	G	G	T	G	T	C	G	G	A	C	T	G	C	A	G	G	T	G	T	C	C	A	T	T	G	C	C	G	A	T	T	C	T	C	A
PADI TIMBUN::IRGC 13451-1::[IRIS 313-10688]	IRIS 313-10688	IRGC 135782	ind3	11	C	G	G	G	C	C	A	A	C	A	G	G	T	G	T	C	G	G	A	C	T	G	C	A	G	G	T	G	T	C	C	A	T	T	G	C	C	G	A	T	T	C	T	C	A
PINDE GOGO WIERIE::IRGC 14795-2::[IRIS 313-10710]	IRIS 313-10710	IRGC 128135	trop	11	C	G	G	G	C	C	A	A	C	A	G	G	T	G	T	C	G	G	A	C	T	G	C	A	G	G	T	G	T	C	C	A	T	T	G	C	C	G	A	T	T	C	T	C	A
GODAWEL::IRGC 15750-1::[IRIS 313-10722]	IRIS 313-10722	IRGC 128301	trop	11	C	G	G	G	C	C	A	A	C	A	G	G	T	G	T	C	G	G	A	C	T	G	C	A	G	G	T	G	T	C	C	A	T	T	G	C	C	G	A	T	T	C	T	C	A
ERNEST::IRGC 15884-2::[IRIS 313-10725]	IRIS 313-10725	IRGC 128518	indx	11	C	G	G	G	C	C	A	A	C	A	G	G	T	G	T	C	G	G	A	C	T	G	C	A	G	G	T	G	T	C	C	A	T	T	G	C	C	G	A	T	T	C	T	C	A
KOUPENEDOU KOUBOURY::IRGC 16011-1::[IRIS 313-10727]	IRIS 313-10727		ind3	11	C	G	G	G	C	C	A	A	C	A	G	G	T	G	T	C	G	G	A	C	T	G	C	A	G	G	T	G	T	C	C	A	T	T	G	C	C	G	A	T	T	C	T	C	A
BARKHE TAULI::IRGC 16116-1::[IRIS 313-10731]	IRIS 313-10731	IRGC 127212	ind1A	11	C	G	G	G	C	C	A	A	C	A	G	G	T	G	T	C	G	G	A	C	T	G	C	A	G	G	T	G	T	C	C	A	T	T	G	C	C	G	A	T	T	C	T	C	A
SERAJU::IRGC 16565-1::[IRIS 313-10743]	IRIS 313-10743	IRGC 128465	trop	11	C	G	G	G	C	C	A	A	C	A	G	G	T	G	T	C	G	G	A	C	T	G	C	A	G	G	T	G	T	C	C	A	T	T	G	C	C	G	A	T	T	C	T	C	A
LUA DUC::IRGC 16718-1::[IRIS 313-10748]	IRIS 313-10748	IRGC 127578	indx	11	C	G	G	G	C	C	A	A	C	A	G	G	T	G	T	C	G	G	A	C	T	G	C	A	G	G	T	G	T	C	C	A	T	T	G	C	C	G	A	T	T	C	T	C	A
MINH SOC (CAMBODIA)::IRGC 16731-2::[IRIS 313-10749]	IRIS 313-10749		ind3	11	C	G	G	G	C	C	A	A	C	A	G	G	T	G	T	C	G	G	A	C	T	G	C	A	G	G	T	G	T	C	C	A	T	T	G	C	C	G	A	T	T	C	T	C	A
NEP BA BONG TO::IRGC 17005-2::[IRIS 313-10755]	IRIS 313-10755	IRGC 128116	ind3	11	C	G	G	G	C	C	A	A	C	A	G	G	T	G	T	C	G	G	A	C	T	G	C	A	G	G	T	G	T	C	C	A	T	T	G	C	C	G	A	T	T	C	T	C	A
GADABUNG (GUNDIL)::IRGC 17569-2::[IRIS 313-10768]	IRIS 313-10768	IRGC 132423	ind3	11	C	G	G	G	C	C	A	A	C	A	G	G	T	G	T	C	G	G	A	C	T	G	C	A	G	G	T	G	T	C	C	A	T	T	G	C	C	G	A	T	T	C	T	C	A
MANGSUR::IRGC 18187-1::[IRIS 313-10791]	IRIS 313-10791	IRGC 127602	ind3	11	C	G	G	G	C	C	A	A	C	A	G	G	T	G	T	C	G	G	A	C	T	G	C	A	G	G	T	G	T	C	C	A	T	T	G	C	C	G	A	T	T	C	T	C	A
MATIANG::IRGC 18220-1::[IRIS 313-10792]	IRIS 313-10792	IRGC 127613	ind3	11	C	G	G	G	C	C	A	A	C	A	G	G	T	G	T	C	G	G	A	C	T	G	C	A	G	G	T	G	T	C	C	A	T	T	G	C	C	G	A	T	T	C	T	C	A
NARUN::IRGC 18320-2::[IRIS 313-10797]	IRIS 313-10797	IRGC 132357	ind3	11	C	G	G	G	C	C	A	A	C	A	G	G	T	G	T	C	G	G	A	C	T	G	C	A	G	G	T	G	T	C	C	A	T	T	G	C	C	G	A	T	T	C	T	C	A
PUAK::IRGC 18512-1::[IRIS 313-10804]	IRIS 313-10804	IRGC 135787	ind3	11	C	G	G	G	C	C	A	A	C	A	G	G	T	G	T	C	G	G	A	C	T	G	C	A	G	G	T	G	T	C	C	A	T	T	G	C	C	G	A	T	T	C	T	C	A
RADEN DJAWA (GUNDIL)::IRGC 18558-1::[IRIS 313-10806]	IRIS 313-10806	IRGC 135789	ind3	11	C	G	G	G	C	C	A	A	C	A	G	G	T	G	T	C	G	G	A	C	T	G	C	A	G	G	T	G	T	C	C	A	T	T	G	C	C	G	A	T	T	C	T	C	A
SEGON BENGGALA::IRGC 18724-1::[IRIS 313-10810]	IRIS 313-10810	IRGC 135793	ind3	11	C	G	G	G	C	C	A	A	C	A	G	G	T	G	T	C	G	G	A	C	T	G	C	A	G	G	T	G	T	C	C	A	T	T	G	C	C	G	A	T	T	C	T	C	A
SEMPOR::IRGC 18761-2::[IRIS 313-10811]	IRIS 313-10811	IRGC 128160	indx	11	C	G	G	G	C	C	A	A	C	A	G	G	T	G	T	C	G	G	A	C	T	G	C	A	G	G	T	G	T	C	C	A	T	T	G	C	C	G	A	T	T	C	T	C	A
SERUNEN::IRGC 18789-1::[IRIS 313-10812]	IRIS 313-10812	IRGC 135794	ind3	11	C	G	G	G	C	C	A	A	C	A	G	G	T	G	T	C	G	G	A	C	T	G	C	A	G	G	T	G	T	C	C	A	T	T	G	C	C	G	A	T	T	C	T	C	A
SIAM BARABAI::IRGC 18800-2::[IRIS 313-10813]	IRIS 313-10813		ind3	11	C	G	G	G	C	C	A	A	C	A	G	G	T	G	T	C	G	G	A	C	T	G	C	A	G	G	T	G	T	C	C	A	T	T	G	C	C	G	A	T	T	C	T	C	A
TJEMPO PENDEK UNTUNG::IRGC 19055-2::[IRIS 313-10818]	IRIS 313-10818	IRGC 128188	ind3	11	C	G	G	G	C	C	A	A	C	A	G	G	T	G	T	C	G	G	A	C	T	G	C	A	G	G	T	G	T	C	C	A	T	T	G	C	C	G	A	T	T	C	T	C	A
HOING CANTEL::IRGC 19282-2::[IRIS 313-10824]	IRIS 313-10824	IRGC 128053	ind3	11	C	G	G	G	C	C	A	A	C	A	G	G	T	G	T	C	G	G	A	C	T	G	C	A	G	G	T	G	T	C	C	A	T	T	G	C	C	G	A	T	T	C	T	C	A
KEMA 5::IRGC 19343-2::[IRIS 313-10825]	IRIS 313-10825	IRGC 132310	indx	11	C	G	G	G	C	C	A	A	C	A	G	G	T	G	T	C	G	G	A	C	T	G	C	A	G	G	T	G	T	C	C	A	T	T	G	C	C	G	A	T	T	C	T	C	A
LUBUK LINGGAU::IRGC 20000-2::[IRIS 313-10842]	IRIS 313-10842	IRGC 128099	ind3	11	C	G	G	G	C	C	A	A	C	A	G	G	T	G	T	C	G	G	A	C	T	G	C	A	G	G	T	G	T	C	C	A	T	T	G	C	C	G	A	T	T	C	T	C	A
INDO NO 7505::IRGC 20162-2::[IRIS 313-10844]	IRIS 313-10844	IRGC 128058	ind3	10.5	C	G	G	G	C	C	A	A	C	A	G	G	T	G	T	C	G	G	A	C	T	G	C	A	G	G	T	G	T	C	C	A	T	T	G	C	C	G	A	T	T	C	T	C	A
ARC 5756::IRGC 20220-2::[IRIS 313-10845]	IRIS 313-10845	IRGC 132418	aus	10.5	C	G	G	G	C	C	A	A	C	A	G	G	T	G	T	C	G	G	A	C	T	G	C	A	G	G	T	G	T	C	C	A	T	T	G	C	C	G	A	T	T	C	T	C	A
ARC 7001::IRGC 20436-1::[IRIS 313-10849]	IRIS 313-10849	IRGC 127166	aus	11	C	G	G	G	C	C	A	A	C	A	G	G	T	G	T	C	G	G	A	C	T	G	C	A	G	G	T	G	T	C	C	A	T	T	G	C	C	G	A	T	T	C	T	C	A
ARC 10825::IRGC 21082-1::[IRIS 313-10857]	IRIS 313-10857	IRGC 127129	admix	11	C	G	G	G	C	C	A	A	C	A	G	G	T	G	T	C	G	G	A	C	T	G	C	A	G	G	T	G	T	C	C	A	T	T	G	C	C	G	A	T	T	C	T	C	A
ARC 10894::IRGC 21122-1::[IRIS 313-10858]	IRIS 313-10858	IRGC 127131	indx	11	C	G	G	G	C	C	A	A	C	A	G	G	T	G	T	C	G	G	A	C	T	G	C	A	G	G	T	G	T	C	C	A	T	T	G	C	C	G	A	T	T	C	T	C	A
ARC 11802::IRGC 21662-2::[IRIS 313-10872]	IRIS 313-10872	IRGC 132421	japx	11	C	G	G	G	C	C	A	A	C	A	G	G	T	G	T	C	G	G	A	C	T	G	C	A	G	G	T	G	T	C	C	A	T	T	G	C	C	G	A	T	T	C	T	C	A
ARC 12180::IRGC 21965-2::[IRIS 313-10880]	IRIS 313-10880	IRGC 127940	ind2	11	C	G	G	G	C	C	A	A	C	A	G	G	T	G	T	C	G	G	A	C	T	G	C	A	G	G	T	G	T	C	C	A	T	T	G	C	C	G	A	T	T	C	T	C	A
ARC 13373::IRGC 22691-1::[IRIS 313-10897]	IRIS 313-10897	IRGC 128227	ind3	11	C	G	G	G	C	C	A	A	C	A	G	G	T	G	T	C	G	G	A	C	T	G	C	A	G	G	T	G	T	C	C	A	T	T	G	C	C	G	A	T	T	C	T	C	A
DAMNOEUB KHSE SAUT::IRGC 22819-2::[IRIS 313-10899]	IRIS 313-10899	IRGC 128025	ind3	11	C	G	G	G	C	C	A	A	C	A	G	G	T	G	T	C	G	G	A	C	T	G	C	A	G	G	T	G	T	C	C	A	T	T	G	C	C	G	A	T	T	C	T	C	A
DAMNOEUB POR HING::IRGC 22841-2::[IRIS 313-10900]	IRIS 313-10900	IRGC 132331	ind3	11	C	G	G	G	C	C	A	A	C	A	G	G	T	G	T	C	G	G	A	C	T	G	C	A	G	G	T	G	T	C	C	A	T	T	G	C	C	G	A	T	T	C	T	C	A
KREM KRAHAM::IRGC 22981-2::[IRIS 313-10904]	IRIS 313-10904	IRGC 128091	ind3	10.5	C	G	G	G	C	C	A	A	C	A	G	G	T	G	T	C	G	G	A	C	T	G	C	A	G	G	T	G	T	C	C	A	T	T	G	C	C	G	A	T	T	C	T	C	A
LUA NEP 4416::IRGC 23006-1::[IRIS 313-10906]	IRIS 313-10906		ind3	11	C	G	G	G	C	C	A	A	C	A	G	G	T	G	T	C	G	G	A	C	T	G	C	A	G	G	T	G	T	C	C	A	T	T	G	C	C	G	A	T	T	C	T	C	A
MOROM::IRGC 23016-2::[IRIS 313-10908]	IRIS 313-10908	IRGC 128112	ind3	11	C	G	G	G	C	C	A	A	C	A	G	G	T	G	T	C	G	G	A	C	T	G	C	A	G	G	T	G	T	C	C	A	T	T	G	C	C	G	A	T	T	C	T	C	A
NEANG CHAN::IRGC 23034-1::[IRIS 313-10909]	IRIS 313-10909	IRGC 135776	ind3	11	C	G	G	G	C	C	A	A	C	A	G	G	T	G	T	C	G	G	A	C	T	G	C	A	G	G	T	G	T	C	C	A	T	T	G	C	C		A	T	T	C	T	C	A
NEANG NARY::IRGC 23084-1::[IRIS 313-10911]	IRIS 313-10911		ind3	11	C	G	G	G	C	C	A	A	C	A	G	G	T	G	T	C	G	G	A	C	T	G	C	A	G	G	T	G	T	C	C	A	T	T	G	C	C	G	A	T	T	C	T	C	A
PHCAR SLA KI::IRGC 23169-2::[IRIS 313-10915]	IRIS 313-10915	IRGC 128133	ind3	11	C	G	G	G	C	C	A	A	C	A	G	G	T	G	T	C	G	G	A	C	T	G	C	A	G	G	T	G	T	C	C	A	T	T	G	C	C	G	A	T	T	C	T	C	A
T Q QI QINYUHAYUHA::IRGC 23342-1::[IRIS 313-10918]	IRIS 313-10918	IRGC 135803	trop	11	C	G	G	G	C	C	A	A	C	A	G	G	T	G	T	C	G	G	A	C	T	G	C	A	G	G	T	G	T	C	C	A	T	T	G	C	C	G	A	T	T	C	T	C	A
ATH HAGARI JARAHAN PADDY::IRGC 23796-1::[IRIS 313-10924]	IRIS 313-10924	IRGC 127176	indx	12	C	G	G	G	C	C	A	A	C	A	G	G	T	G	T	C	G	G	A	C	T	G	C	A	G	G	T	G	T	C	C	A	T	T	G	C	C	G	A	T	T	C	T	C	A
SUGA PANKHA::IRGC 24054-1::[IRIS 313-10927]	IRIS 313-10927	IRGC 127828	aus	11	C	G	G	G	C	C	A	A	C	A	G	G	T	G	T	C	G	G	A	C	T	G	C	A	G	G	T	G	T	C	C	A	T	T	G	C	C	G	A	T	T	C	T	C	A
KOLONGI BAO::IRGC 24135-2::[IRIS 313-10929]	IRIS 313-10929	IRGC 128090	ind2	11	C	G	G	G	C	C	A	A	C	A	G	G	T	G	T	C	G	G	A	C	T	G	C	A	G	G	T	G	T	C	C	A	T	T	G	C	C	G	A	T	T	C	T	C	A
BRONDOL PUTIH::IRGC 24541-1::[IRIS 313-10935]	IRIS 313-10935	IRGC 127238	ind3	11	C	G	G	G	C	C	A	A	C	A	G	G	T	G	T	C	G	G	A	C	T	G	C	A	G		T	G	T	C	C	A	T	T	G	C	C	G	A	T	T	C	T	C	A
SIGUPAI::IRGC 24642-2::[IRIS 313-10938]	IRIS 313-10938		ind3	11	C	G	G	G	C	C	A	A	C	A	G	G	T	G	T	C	G	G	A	C	T	G	C	A	G	G	T	G	T	C	C	A	T	T	G	C	C	G	A	T	T	C	T	C	A
MANGGE::IRGC 25019-1::[IRIS 313-10946]	IRIS 313-10946	IRGC 128380	trop	11	C	G	G	G	C	C	A	A	C	A	G	G	T	G	T	C	G	G	A	C	T	G	C	A	G	G	T	G	T	C	C	A	T	T	G	C	C	G	A	T	T	C	T	C	A
PADI GRUNDUL 1::IRGC 25493-1::[IRIS 313-10954]	IRIS 313-10954	IRGC 127700	ind3	11	C	G	G	G	C	C	A	A	C	A	G	G	T	G	T	C	G	G	A	C	T	G	C	A	G	G	T	G	T	C	C	A	T	T	G	C	C	G	A	T	T	C	T	C	A
SUNGKAI::IRGC 25812-1::[IRIS 313-10960]	IRIS 313-10960	IRGC 132042	trop	11	C	G	G	G	C	C	A	A	C	A	G	G	T	G	T	C	G	G	A	C	T	G	C	A	G	G	T	G	T	C	C	A	T	T	G	C	C	G	A	T	T	C	T	C	A
TARING PELUNDUK::IRGC 25821-2::[IRIS 313-10961]	IRIS 313-10961		ind3	11	C	G	G	G	C	C	A	A	C	A	G	G	T	G	T	C	G	G	A	C	T	G	C	A	G	G	T	G	T	C	C	A	T	T	G	C	C	G	A	T	T	C	T	C	A
IH PEN SHIM MING::IRGC 26067-1::[IRIS 313-10968]	IRIS 313-10968	IRGC 127428	ind1A	11	C	G	G	G	C	C	A	A	C	A	G	G	T	G	T	C	G	G	A	C	T	G	C	A	G	G	T	G	T	C	C	A	T	T	G	C	C	G	A	T	T	C	T	C	A
JHUL DIGA::IRGC 26478-1::[IRIS 313-10981]	IRIS 313-10981	IRGC 127456	aus	11	C	G	G	G	C	C	A	A	C	A	G	G	T	G	T	C	G	G	A	C	T	G	C	A	G	G	T	G	T	C	C	A	T	T	G	C	C	G	A	T	T	C	T	C	A
GOBOL SAIL (BALAM)::IRGC 26624-2::[IRIS 313-10985]	IRIS 313-10985	IRGC 132424	ind2	11	C	G	G	G	C	C	A	A	C	A	G	G	T	G	T	C	G	G	A	C	T	G	C	A	G	G	T	G	T	C	C	A	T	T	G	C	C	G	A	T	T	C	T	C	A
SUNGA WALA::IRGC 26802-1::[IRIS 313-10987]	IRIS 313-10987		aus	11	C	G	G	G	C	C	A	A	C	A	G	G	T	G	T	C	G	G	A	C	T	G	C	A	G	G	T	G	T	C	C	A	T	T	G	C	C	G	A	T	T	C	T	C	A
BAKASI::IRGC 27074-1::[IRIS 313-10996]	IRIS 313-10996	IRGC 127204	indx	11	C	G	G	G	C	C	A	A	C	A	G	G	T	G	T	C	G	G	A	C	T	G	C	A	G	G	T	G	T	C	C	A	T	T	G	C	C	G	A	T	T	C	T	C	A
CEMPO MANGGAR::IRGC 27107-1::[IRIS 313-10997]	IRIS 313-10997	IRGC 127250	ind3	11	C	G	G	G	C	C	A	A	C	A	G	G	T	G	T	C	G	G	A	C	T	G	C	A	G	G	T	G	T	C	C	A	T	T	G	C	C	G	A	T	T	C	T	C	A
PAE MEETO::IRGC 27254-1::[IRIS 313-11003]	IRIS 313-11003	IRGC 127918	trop	11	C	G	G	G	C	C	A	A	C	A	G	G	T	G	T	C	G	G	A	C	T	G	C	A	G	G	T	G	T	C	C	A	T	T	G	C	C	G	A	T	T	C	T	C	A
KACHILON::IRGC 27555-1::[IRIS 313-11016]	IRIS 313-11016	IRGC 128328	aus	11	C	G	G	G	C	C	A	A	C	A	G	G	T	G	T	C	G	G	A	C	T	G	C	A	G	G	T	G	T	C	C	A	T	T	G	C	C	G	A	T	T	C	T	C	A
ZIRA SHAHI::IRGC 28327-1::[IRIS 313-11035]	IRIS 313-11035	IRGC 128513	admix	11	C	G	G	G	C	C	A	A	C	A	G	G	T	G	T	C	G	G	A	C	T	G	C	A	G	G	T	G	T	C	C	A	T	T	G	C	C	G	A	T	T	C	T	C	A
AI NAN TSAO 39::IRGC 28461-2::[IRIS 313-11038]	IRIS 313-11038	IRGC 127924	ind1A	12	C	G	G	G	C	C	A	A	C	A	G	G	T	G	T	C	G	G	A	C	T	G	C	A	G	G	T	G	T	C	C	A	T	T	G	C	C	G	A	T	T	C	T	C	A
KWANG LU AI 4::IRGC 28480-2::[IRIS 313-11039]	IRIS 313-11039	IRGC 128093	ind1A	11	C	G	G	G	C	C	A	A	C	A	G	G	T	G	T	C	G	G	A	C	T	G	C	A	G	G	T	G	T	C	C	A	T	T	G	C	C	G	A	T	T	C	T	C	A
KAVIVARI SAMBA::IRGC 28597-2::[IRIS 313-11040]	IRIS 313-11040		indx	11	C	G	G	G	C	C	A	A	C	A	G	G	T	G	T	C	G	G	A	C	T	G	C	A	G	G	T	G	T	C	C	A	T	T	G	C	C	G	A	T	T	C	T	C	A
VELLAIKOTTAI::IRGC 28618-1::[IRIS 313-11042]	IRIS 313-11042		indx	11	C	G	G	G	C	C	A	A	C	A	G	G	T	G	T	C	G	G	A	C	T	G	C	A	G	G	T	G	T	C	C	A	T	T	G	C	C	G	A	T	T	C	T	C	A
BENGKA KERSEK::IRGC 28666-1::[IRIS 313-11043]	IRIS 313-11043		ind3	11	C	G	G	G	C	C	A	A	C	A	G	G	T	G	T	C	G	G	A	C	T	G	C	A	G	G	T	G	T	C	C	A	T	T	G	C	C	G	A	T	T	C	T	C	A
AUS 233::IRGC 29036-1::[IRIS 313-11050]	IRIS 313-11050	IRGC 127180	aus	11	C	G	G	G	C	C	A	A	C	A	G	G	T	G	T	C	G	G	A	C	T	G	C	A	G	G	T	G	T	C	C	A	T	T	G	C	C	G	A	T	T	C	T	C	A
AUS 282::IRGC 29072-1::[IRIS 313-11053]	IRIS 313-11053	IRGC 127183	aus	11	C	G	G	G	C	C	A	A	C	A	G	G	T	G	T	C	G	G	A	C	T	G	C	A	G	G	T	G	T	C	C	A	T	T	G	C	C	G	A	T	T	C	T	C	A
AUS 329::IRGC 29116-1::[IRIS 313-11058]	IRIS 313-11058	IRGC 127188	aus	11	C	G	G	G	C	C	A	A	C	A	G	G	T	G	T	C	G	G	A	C	T	G	C	A	G	G	T	G	T	C	C	A	T	T	G	C	C	G	A	T	T	C	T	C	A
AUS 344::IRGC 29131-1::[IRIS 313-11059]	IRIS 313-11059	IRGC 127189	aus	11	C	G	G	G	C	C	A	A	C	A	G	G	T	G	T	C	G	G	A	C	T	G	C	A	G	G	T	G	T	C	C	A	T	T	G	C	C	G	A	T	T	C	T	C	A
CHAO HAI::IRGC 29450-2::[IRIS 313-11071]	IRIS 313-11071	IRGC 128011	indx	11	C	G	G	G	C	C	A	A	C	A	G	G	T	G	T	C	G	G	A	C	T	G	C	A	G	G	T	G	T	C	C	A	T	T	G	C	C	G	A	T	T	C	T	C	A
CHAO LEP NOK::IRGC 29451-2::[IRIS 313-11072]	IRIS 313-11072	IRGC 128012	ind3	11	C	G	G	G	C	C	A	A	C	A	G	G	T	G	T	C	G	G	A	C	T	G	C	A	G	G	T	G	T	C	C	A	T	T	G	C	C	G	A	T	T	C	T	C	A
KHAO DAM::IRGC 29481-3::[IRIS 313-11073]	IRIS 313-11073	IRGC 132272	subtrop	11	C	G	G	G	C	C	A	A	C	A	G	G	T	G	T	C	G	G	A	C	T	G	C	A	G	G	T	G	T	C	C	A	T	T	G	C	C	G	A	T	T	C	T	C	A
SRAU THMOR::IRGC 29904-1::[IRIS 313-11089]	IRIS 313-11089	IRGC 127824	ind3	12	C	G	G	G	C	C	A	A	C	A	G	G	T	G	T	C	G	G	A	C	T	G	C	A	G	G	T	G	T	C	C	A	T	T	G	C	C	G	A	T	T	C	T	C	A
KEO LAI::IRGC 29969-2::[IRIS 313-11090]	IRIS 313-11090	IRGC 128076	ind3	11	C	G	G	G	C	C	A	A	C	A	G	G	T	G	T	C	G	G	A	C	T	G	C	A	G	G	T	G	T	C	C	A	T	T	G	C	C	G	A	T	T	C	T	C	A
MAK BOUAP::IRGC 30106-3::[IRIS 313-11094]	IRIS 313-11094	IRGC 132274	subtrop	11	C	G	G	G	C	C	A	A	C	A	G	G	T	G	T	C	G	G	A	C	T	G	C	A	G	G	T	G	T	C	C	A	T	T	G	C	C	G	A	T	T	C	T	C	A
CADUNG SO BLOC 1::IRGC 30231-1::[IRIS 313-11096]	IRIS 313-11096	IRGC 135743	ind3	11	C	G	G	G	C	C	A	A	C	A	G	G	T	G	T	C	G	G	A	C	T	G	C	A	G	G	T	G	T	C	C	A	T	T	G	C	C	G	A	T	T	C	T	C	A
KALAGNON::IRGC 30335-1::[IRIS 313-11097]	IRIS 313-11097	IRGC 127478	indx	11	C	G	G	G	C	C	A	A	C	A	G	G	T	G	T	C	G	G	A	C	T	G	C	A	G	G	T	G	T	C	C	A	T	T	G	C	C	G	A	T	T	C	T	C	A
PECALO::IRGC 30595-2::[IRIS 313-11099]	IRIS 313-11099		ind2	11	C	G	G	G	C	C	A	A	C	A	G	G	T	G	T	C	G	G	A	C	T	G	C	A	G	G	T	G	T	C	C	A	T	T	G	C	C	G	A	T	T	C	T		A
MAMON::IRGC 30792-1::[IRIS 313-11100]	IRIS 313-11100		trop	11	C	G	G	G	C	C	A	A	C	A	G	G	T	G	T	C	G	G	A	C	T	G	C	A	G	G	T	G	T	C	C	A	T	T	G	C	C	G	A	T	T	C	T	C	A
HIJOL DIGA::IRGC 31655-1::[IRIS 313-11112]	IRIS 313-11112	IRGC 128308	aus	11	C	G	G	G	C	C	A	A	C	A	G	G	T	G	T	C	G	G	A	C	T	G	C	A	G	G	T	G	T	C	C	A	T	T	G	C	C	G	A	T	T	C	T	C	A
SOC NAU (BIEN THE)::IRGC 32074-1::[IRIS 313-11118]	IRIS 313-11118	IRGC 135797	ind3	11	C	G	G	G	C	C	A	A	C	A	G	G	T	G	T	C	G	G	A	C	T	G	C	A	G	G	T	G	T	C	C	A	T	T	G	C	C	G	A	T	T	C	T	C	A
MANSAT 3::IRGC 33341-1::[IRIS 313-11134]	IRIS 313-11134	IRGC 135771	indx	11	C	G	G	G	C	C	A	A	C	A	G	G	T	G	T	C	G	G	A	C	T	G	C	A	G	G	T	G	T	C	C	A	T	T	G	C	C	G	A	T	T	C	T	C	A
PADAN::IRGC 33544-2::[IRIS 313-11140]	IRIS 313-11140	IRGC 128123	ind3	11	C	G	G	G	C	C	A	A	C	A	G	G	T	G	T	C	G	G	A	C	T	G	C	A	G	G	T	G	T	C	C	A	T	T	G	C	C	G	A	T	T	C	T	C	A
LAL TAURA::IRGC 35017-1::[IRIS 313-11170]	IRIS 313-11170	IRGC 127547	aus	11	C	G	G	G	C	C	A	A	C	A	G	G	T	G	T	C	G	G	A	C	T	G	C	A	G	G	T	G	T	C	C	A	T	T	G	C	C	G	A	T	T	C	T	C	A
SI OMPAN LAMA::IRGC 35481-1::[IRIS 313-11179]	IRIS 313-11179	IRGC 127810	ind3	11	C	G	G	G	C	C	A	A	C	A	G	G	T	G	T	C	G	G	A	C	T	G	C	A	G	G	T	G	T	C	C	A	T	T	G	C	C	G	A	T	T	C	T	C	A
CEMPO CINA::IRGC 35581-2::[IRIS 313-11182]	IRIS 313-11182	IRGC 128009	ind3	11	C	G	G	G	C	C	A	A	C	A	G	G	T	G	T	C	G	G	A	C	T	G	C	A	G	G	T	G	T	C	C	A	T	T	G	C	C	G	A	T	T	C	T	C	A
DICULA::IRGC 36729-2::[IRIS 313-11196]	IRIS 313-11196	IRGC 132333	ind3	11	C	G	G	G	C	C	A	A	C	A	G	G	T	G	T	C	G	G	A	C	T	G	C	A	G	G	T	G	T	C	C	A	T	T	G	C	C	G	A	T	T	C	T	C	A
BR 52-87-1::IRGC 36849-2::[IRIS 313-11200]	IRIS 313-11200	IRGC 128002	ind1B	11	C	G	G	G	C	C	A	A	C	A	G	G	T	G	T	C	G	G	A	C	T	G	C	A	G	G	T	G	T	C	C	A	T	T	G	C	C	G	A	T	T	C	T	C	A
4583::IRGC 36894-2::[IRIS 313-11202]	IRIS 313-11202	IRGC 127920	temp	11	C	G	G	G	C	C	A	A	C	A	G	G	T	G	T	C	G	G	A	C	T	G	C	A	G	G	T	G	T	C	C	A	T	T	G	C	C	G	A	T	T	C	T	C	A
GOCHIAGARI::IRGC 37086-2::[IRIS 313-11203]	IRIS 313-11203	IRGC 128044	ind2	11	C	G	G	G	C	C	A	A	C	A	G	G	T	G	T	C	G	G	A	C	T	G	C	A	G	G	T	G	T	C	C	A	T	T	G	C	C	G	A	T	T	C	T	C	A
KARTIKHAMA::IRGC 37149-2::[IRIS 313-11204]	IRIS 313-11204	IRGC 128072	indx	11	C	G	G	G	C	C	A	A	C	A	G	G	T	G	T	C	G	G	A	C	T	G	C	A	G	G	T	G	T	C	C	A	T	T	G	C	C	G	A	T	T	C	T	C	A
CHITRAJ 14-134::IRGC 37837-2::[IRIS 313-11220]	IRIS 313-11220	IRGC 128015	ind2	11	C	G	G	G	C	C	A	A	C	A	G	G	T	G	T	C	G	G	A	C	T	G	C	A	G	G	T	G	T	C	C	A	T	T	G	C	C	G	A	T	T	C	T	C	A
DUDHSWAR 15-157::IRGC 37967-2::[IRIS 313-11222]	IRIS 313-11222	IRGC 132308	ind2	11	C	G	G	G	C	C	A	A	C	A	G	G	T	G	T	C	G	G	A	C	T	G	C	A	G	G	T	G	T	C	C	A	T	T	G	C	C	G	A	T	T	C	T	C	A
CR 157-392-4::IRGC 39247-2::[IRIS 313-11240]	IRIS 313-11240	IRGC 128020	indx	11	C	G	G	G	C	C	A	A	C	A	G	G	T	G	T	C	G	G	A	C	T	G	C	A	G	G	T	G	T	C	C	A	T	T	G	C	C	G	A	T	T	C	T	C	A
RP 20-12::IRGC 40031-2::[IRIS 313-11245]	IRIS 313-11245	IRGC 128151	indx	11	C	G	G	G	C	C	A	A	C	A	G	G	T	G	T	C	G	G	A	C	T	G	C	A	G	G	T	G	T	C	C	A	T	T	G	C	C	G	A	T	T	C	T	C	A
7516-14::IRGC 40090-3::[IRIS 313-11246]	IRIS 313-11246	IRGC 132271	temp	11	C	G	G	G	C	C	A	A	C	A	G	G	T	G	T	C	G	G	A	C	T	G	C	A	G	G	T	G	T	C	C	A	T	T	G	C	C	G	A	T	T	C	T	C	A
IR 4500-5-1-1::IRGC 40552-2::[IRIS 313-11251]	IRIS 313-11251	IRGC 132340	ind1B	11	C	G	G	G	C	C	A	A	C	A	G	G	T	G	T	C	G	G	A	C	T	G	C	A	G	G	T	G	T	C	C	A	T	T	G	C	C	G	A	T	T	C	T	C	A
ADR 52::IRGC 40638-2::[IRIS 313-11252]	IRIS 313-11252		indx	11	C	G	G	G	C	C	A	A	C	A	G	G	T	G	T	C	G	G	A	C	T	G	C	A	G	G	T	G	T	C	C	A	T	T	G	C	C	G	A	T	T	C	T	C	A
ARC 14358::IRGC 41523-2::[IRIS 313-11267]	IRIS 313-11267	IRGC 127956	ind2	11	C	G	G	G	C	C	A	A	C	A	G	G	T	G	T	C	G	G	A	C	T	G	C	A	G	G	T	G	T	C	C	A	T	T	G	C	C	G	A	T	T	C	T	C	A
ARC 15505::IRGC 42066-1::[IRIS 313-11281]	IRIS 313-11281	IRGC 131967	ind1A	11	C	G	G	G	C	C	A	A	C	A	G	G	T	G	T	C	G	G	A	C	T	G	C	A	G	G	T	G	T	C	C	A	T	T	G	C	C	G	A	T	T	C	T	C	A
ARC 18325::IRGC 42399-1::[IRIS 313-11286]	IRIS 313-11286	IRGC 135736	indx	11	C	G	G	G	C	C	A	A	C	A	G	G	T	G	T	C	G	G	A	C	T	G	C	A	G	G	T	G	T	C	C	A	T	T	G	C	C	G	A	T	T	C	T	C	A
ARC 10120::IRGC 42557-2::[IRIS 313-11292]	IRIS 313-11292	IRGC 127929	indx	11	C	G	G	G	C	C	A	A	C	A	G	G	T	G	T	C	G	G	A	C	T	G	C	A	G	G	T	G	T	C	C	A	T	T	G	C	C	G	A	T	T	C	T	C	A
ARC 11397::IRGC 42664-1::[IRIS 313-11295]	IRIS 313-11295	IRGC 127137	admix	12	C	G	G	G	C	C	A	A	C	A	G	G	T	G	T	C	G	G	A	C	T	G	C	A	G	G	T	G	T	C	C	A	T	T	G	C	C	G	A	T	T	C	T	C	A
ARC 15862::IRGC 43242-1::[IRIS 313-11309]	IRIS 313-11309	IRGC 128229	indx	11	C	G	G	G	C	C	A	A	C	A	G	G	T	G	T	C	G	G	A	C	T	G	C	A	G	G	T	G	T	C	C	A	T	T	G	C	C	G	A	T	T	C	T	C	A
RANTAT::IRGC 43563-1::[IRIS 313-11316]	IRIS 313-11316	IRGC 135790	ind3	11	C	G	G	G	C	C	A	A	C	A	G	G	T	G	T	C	G	G	A	C	T	G	C	A	G	G	T	G	T	C	C	A	T	T	G	C	C	G	A	T	T	C	T	C	A
SI RANTING::IRGC 43645-2::[IRIS 313-11317]	IRIS 313-11317	IRGC 128167	ind3	11	C	G	G	G	C	C	A	A	C	A	G	G	T	G	T	C	G	G	A	C	T	G	C	A	G	G	T	G	T	C	C	A	T	T	G	C	C	G	A	T	T	C	T	C	A
TUBU::IRGC 43677-2::[IRIS 313-11318]	IRIS 313-11318	IRGC 128195	ind3	11	C	G	G	G	C	C	A	A	C	A	G	G	T	G	T	C	G	G	A	C	T	G	C	A	G	G	T	G	T	C	C	A	T	T	G	C	C	G	A	T	T	C	T	C	A
KALABOKRI::IRGC 43872-1::[IRIS 313-11324]	IRIS 313-11324	IRGC 127477	aus	11	C	G	G	G	C	C	A	A	C	A	G	G	T	G	T	C	G	G	A	C	T	G	C	A	G	G	T	G	T	C	C	A	T	T	G	C	C	G	A	T	T	C	T	C	A
AMPIPIT::IRGC 44272-2::[IRIS 313-11331]	IRIS 313-11331	IRGC 132237	ind3	11	C	G	G	G	C	C	A	A	C	A	G	G	T	G	T	C	G	G	A	C	T	G	C	A	G	G	T	G	T	C	C	A	T	T	G	C	C	G	A	T	T	C	T	C	A
MINDANAO::IRGC 44642-2::[IRIS 313-11341]	IRIS 313-11341	IRGC 128110	ind3	11	C	G	G	G	C	C	A	A	C	A	G	G	T	G	T	C	G	G	A	C	T	G	C	A	G	G	T	G	T	C	C	A	T	T	G	C	C	G	A	T	T	C	T	C	A
SAMON::IRGC 44735-2::[IRIS 313-11344]	IRIS 313-11344	IRGC 128157	ind3	11	C	G	G	G	C	C	A	A	C	A	G	G	T	G	T	C	G	G	A	C	T	G	C	A	G	G	T	G	T	C	C	A	T	T	G	C	C	G	A	T	T	C	T	C	A
WAGWAG::IRGC 44802-1::[IRIS 313-11345]	IRIS 313-11345	IRGC 127891	indx	11	C	G	G	G	C	C	A	A	C	A	G	G	T	G	T	C	G	G	A	C	T	G	C	A	G	G	T	G	T	C	C	A	T	T	G	C	C	G	A	T	T	C	T	C	A
WAGWAG PUTI::IRGC 44804-2::[IRIS 313-11346]	IRIS 313-11346	IRGC 132371	ind1B	11	C	G	G	G	C	C	A	A	C	A	G	G	T	G	T	C	G	G	A	C	T	G	C	A	G	G	T	G	T	C	C	A	T	T	G	C	C	G	A	T	T	C	T	C	A
WAGWAG RAOIS::IRGC 44805-1::[IRIS 313-11347]	IRIS 313-11347	IRGC 127892	indx	11	C	G	G	G	C	C	A	A	C	A	G	G	T	G	T	C	G	G	A	C	T	G	C	A	G	G	T	G	T	C	C	A	T	T	G	C	C	G	A	T	T	C	T	C	A
CHILE BORO::IRGC 45297-2::[IRIS 313-11353]	IRIS 313-11353	IRGC 128013	aus	11	C	G	G	G	C	C	A	A	C	A	G	G	T	G	T	C	G	G	A	C	T	G	C	A	G	G	T	G	T	C	C	A	T	T	G	C	C	G	A	T	T	C	T	C	A
SACHI::IRGC 46612-2::[IRIS 313-11370]	IRIS 313-11370	IRGC 132368	ind2	11	C	G	G	G	C	C	A	A	C	A	G	G	T	G	T	C	G	G	A	C	T	G	C	A	G	G	T	G	T	C	C	A	T	T	G	C	C	G	A	T	T	C	T	C	A
AMARILLO::IRGC 47120-1::[IRIS 313-11377]	IRIS 313-11377	IRGC 127119	indx	11	C	G	G	G	C	C	A	A	C	A	G	G	T	G	T	C	G	G	A	C	T	G	C	A	G	G	T	G	T	C	C	A	T	T	G	C	C	G	A	T	T	C	T	C	A
LINANGAN::IRGC 47255-2::[IRIS 313-11381]	IRIS 313-11381	IRGC 132351	ind3	11	C	G	G	G	C	C	A	A	C	A	G	G	T	G	T	C	G	G	A	C	T	G	C	A	G	G	T	G	T	C	C	A	T	T	G	C	C	G	A	T	T	C	T	C	A
CHIEM NGAN::IRGC 47488-1::[IRIS 313-11383]	IRIS 313-11383	IRGC 127274	indx	11	C	G	G	G	C	C	A	A	C	A	G	G	T	G	T	C	G	G	A	C	T	G	C	A	G	G	T	G	T	C	C	A	T	T	G	C	C	G	A	T	T	C	T	C	A
IR 9747 SEL::IRGC 47695-1::[IRIS 313-11385]	IRIS 313-11385	IRGC 127442	indx	12	C	G	G	G	C	C	A	A	C	A	G	G	T	G	T	C	G	G	A	C	T	G	C	A	G	G	T	G	T	C	C	A	T	T	G	C	C	G	A	T	T	C	T	C	A
KHAO DAWK MALI TIA::IRGC 47773-2::[IRIS 313-11386]	IRIS 313-11386	IRGC 128083	ind3	11	C	G	G	G	C	C	A	A	C	A	G	G	T	G	T	C	G	G	A	C	T	G	C	A	G	G	T	G	T	C	C	A	T	T	G	C	C	G	A	T	T	C	T	C	A
INDO NO 13030::IRGC 48630-2::[IRIS 313-11394]	IRIS 313-11394	IRGC 128057	indx	11	C	G	G	G	C	C	A	A	C	A	G	G	T	G	T	C	G	G	A	C	T	G	C	A	G	G	T	G	T	C	C	A	T	T	G	C	C	G	A	T	T	C	T	C	A
INDO NO 13075::IRGC 48665-1::[IRIS 313-11395]	IRIS 313-11395	IRGC 135755	ind3	11	C	G	G	G	C	C	A	A	C	A	G	G	T	G	T	C	G	G	A	C	T	G	C	A	G	G	T	G	T	C	C	A	T	T	G	C	C	G	A	T	T	C	T	C	A
AMON 4::IRGC 49375-2::[IRIS 313-11404]	IRIS 313-11404	IRGC 127925	ind2	11	C	G	G	G	C	C	A	A	C	A	G	G	T	G	T	C	G	G	A	C	T	G	C	A	G	G	T	G	T	C	C	A	T	T	G	C	C	G	A	T	T	C	T	C	A
BATCHA BHOG (SCENTED)::IRGC 49440-2::[IRIS 313-11407]	IRIS 313-11407	IRGC 127989	ind2	11	C	G	G	G	C	C	A		C	A	G	G	T	G	T	C	G	G	A	C	T	G	C	A	G	G	T	G	T	C	C	A	T	T	G	C	C	G	A	T	T	C	T	C	A
ZACATEPEC A 79::IRGC 51116-1::[IRIS 313-11438]	IRIS 313-11438	IRGC 127909	indx	11	C	G	G	G	C	C	A	A	C	A	G	G	T	G	T	C	G	G	A	C	T	G	C	A	G	G	T	G	T	C	C	A	T	T	G	C	C	G	A	T	T	C	T	C	A
KATSIYAM TABAO::IRGC 52855-1::[IRIS 313-11463]	IRIS 313-11463	IRGC 127499	indx	11	C	G	G	G	C	C	A	A	C	A	G	G	T	G	T	C		G	A	C	T	G	C	A	G	G	T	G	T	C	C	A	T	T	G	C	C	G	A	T	T	C	T	C	A
PR 106::IRGC 53418-1::[IRIS 313-11480]	IRIS 313-11480	IRGC 127742	ind1B	11	C	G	G	G	C	C	A	A	C	A	G	G	T	G	T	C	G	G	A	C	T	G	C	A	G	G	T	G	T	C	C	A	T	T	G	C	C	G	A	T	T	C	T	C	A
BINNAFUL::IRGC 53479-1::[IRIS 313-11481]	IRIS 313-11481	IRGC 127228	aus	11	C	G	G	G	C	C	A	A	C	A	G	G	T	G	T	C	G	G	A	C	T	G	C	A	G	G	T	G	T	C	C	A	T	T	G	C	C	G	A	T	T	C	T	C	A
EJALI::IRGC 53500-1::[IRIS 313-11484]	IRIS 313-11484	IRGC 127357	aus	11	C	G	G	G	C	C	A	A	C	A	G	G	T	G	T	C	G	G	A	C	T	G	C	A	G	G	T	G	T	C	C	A	T	T	G	C	C	G	A	T	T	C	T	C	A
BIR BAHADUR::IRGC 53889-1::[IRIS 313-11491]	IRIS 313-11491	IRGC 127230	ind2	11	C	G	G	G	C	C	A	A	C	A	G	G	T	G	T		G	G	A	C	T	G	C	A	G	G	T	G	T	C	C	A	T	T	G	C	C	G	A	T	T	C	T	C	A
SIRHANTI::IRGC 53930-1::[IRIS 313-11492]	IRIS 313-11492	IRGC 127813	aus	11	C	G	G	G	C	C	A	A	C	A	G	G	T	G	T	C	G	G	A	C	T	G	C	A	G	G	T	G	T	C	C	A	T	T	G	C	C	G	A	T	T	C	T	C	A
K 15591-4::IRGC 55043-1::[IRIS 313-11506]	IRIS 313-11506	IRGC 127470	indx	11	C	G	G	G	C	C	A	A	C	A	G	G	T	G	T	C	G	G	A	C	T	G	C	A	G	G	T	G	T	C	C	A	T	T	G	C	C	G	A	T	T	C	T	C	A
PRADOO DAENG::IRGC 55265-1::[IRIS 313-11509]	IRIS 313-11509	IRGC 132035	ind3	11	C	G	G	G	C	C	A	A	C	A	G	G	T	G	T	C	G	G	A	C	T	G	C	A	G	G	T	G	T	C	C	A	T	T	G	C	C	G	A	T	T	C	T	C	A
OYAK PAKANG::IRGC 55422-1::[IRIS 313-11512]	IRIS 313-11512	IRGC 127693	indx	11	C	G	G	G	C	C	A	A	C	A	G	G	T	G	T	C	G	G	A	C	T	G	C	A	G	G	T	G	T	C	C	A	T	T	G	C	C	G	A	T	T	C	T	C	A
CHATO::IRGC 55825-1::[IRIS 313-11513]	IRIS 313-11513	IRGC 127269	ind1B	11	C	G	G	G	C	C	A	A	C	A	G	G	T	G	T	C	G	G	A	C	T	G	C	A	G	G	T	G	T	C	C	A	T	T	G	C	C	G	A	T	T	C	T	C	A
BKN BR 1031-78-5-4::IRGC 55927-1::[IRIS 313-11515]	IRIS 313-11515	IRGC 127231	indx	11	C	G	G	G	C	C	A	A	C	A	G	G	T	G	T	C	G	G	A	C	T	G	C	A	G	G	T	G	T	C	C	A	T	T	G	C	C	G	A	T	T	C	T	C	A
DIAMBARANG::IRGC 56726-1::[IRIS 313-11525]	IRIS 313-11525	IRGC 127319	ind3	11	C	G	G	G	C	C	A	A	C	A	G	G	T	G	T	C	G	G	A	C	T	G	C	A	G	G	T	G	T	C	C	A	T	T	G	C		G	A	T	T	C	T	C	A
ZO::IRGC 56914-1::[IRIS 313-11528]	IRIS 313-11528	IRGC 127917	ind3	11	C	G	G	G	C	C	A	A	C	A	G	G	T	G	T	C	G	G	A	C	T	G	C	A	G	G	T	G	T	C	C	A	T	T	G	C	C	G	A	T	T	C	T	C	A
JAO KHAO::IRGC 57046-1::[IRIS 313-11530]	IRIS 313-11530	IRGC 131993	ind3	11	C	G	G	G	C	C	A	A	C	A	G	G	T	G	T	C	G	G	A	C	T	G	C	A	G	G	T	G	T	C	C	A	T	T	G	C	C	G	A	T	T	C	T	C	A
WIR 2091::IRGC 57536-1::[IRIS 313-11536]	IRIS 313-11536	IRGC 128502	temp	11	C	G	G	G	C	C	A	A	C	A	G	G	T	G	T	C	G	G	A	C	T	G	C	A	G	G	T	G	T	C	C	A	T	T	G	C	C	G	A	T	T	C	T	C	A
J 6 IR 438 (WC 694)::IRGC 57599-1::[IRIS 313-11537]	IRIS 313-11537	IRGC 127446	trop	11	C	G	G	G	C	C	A	A	C	A	G	G	T	G	T	C	G	G	A	C	T	G	C	A	G	G	T	G	T	C	C	A	T	T	G	C	C	G	A	T	T	C	T	C	A
NULI::IRGC 58824-1::[IRIS 313-11558]	IRIS 313-11558	IRGC 127684	ind2	11	C	G	G	G	C	C	A	A	C	A	G	G	T	G	T	C	G	G	A	C	T	G	C	A	G	G	T	G	T	C	C	A	T	T	G	C	C	G	A	T	T	C	T	C	A
SATHIYA::IRGC 59225-1::[IRIS 313-11568]	IRIS 313-11568	IRGC 127789	ind1A	11	C	G	G	G	C	C	A	A	C	A	G	G	T	G	T	C	G	G	A	C	T	G	C	A	G	G	T	G	T	C	C	A	T	T	G	C	C	G	A	T	T	C	T	C	A
GENG 77-4::IRGC 59321-1::[IRIS 313-11570]	IRIS 313-11570	IRGC 127383	indx	11	C	G	G	G	C	C	A	A	C	A	G	G	T	G	T	C	G	G	A	C	T	G	C	A	G	G	T	G	T	C	C	A	T	T	G	C	C	G	A	T	T	C	T	C	A
BAI MI TIE QIU::IRGC 59414-1::[IRIS 313-11572]	IRIS 313-11572	IRGC 127201	ind1A	11	C	G	G	G	C	C	A	A	C	A	G	G	T	G	T	C	G	G	A	C	T	G	C	A	G	G	T	G	T	C	C	A	T	T	G	C	C	G	A	T	T	C	T	C	A
HONG PI NUO::IRGC 59638-1::[IRIS 313-11575]	IRIS 313-11575	IRGC 127415	temp	11	C	G	G	G	C	C	A	A	C	A	G	G	T	G	T	C	G	G	A	C	T	G	C	A	G	G	T	G	T	C	C	A	T	T	G	C	C	G	A	T	T	C	T	C	A
JIANG HUI DAO::IRGC 59688-1::[IRIS 313-11576]	IRIS 313-11576	IRGC 127459	indx	11	C	G	G	G	C	C	A	A	C	A	G	G	T	G	T	C	G	G	A	C	T	G	C	A	G	G	T	G	T	C	C	A	T	T	G	C	C	G	A	T	T	C	T	C	A
WAN GENG BAI DAO TOU::IRGC 59948-1::[IRIS 313-11582]	IRIS 313-11582	IRGC 128499	temp	11	C	G	G	G	C	C	A	A	C	A	G	G	T	G	T	C	G	G	A	C	T	G	C	A	G	G	T	G	T	C	C	A	T	T	G	C	C	G	A	T	T	C	T	C	A
YI SUI QI::IRGC 60088-1::[IRIS 313-11584]	IRIS 313-11584	IRGC 128508	temp	11	C	G	G	G	C	C	A	A	C	A	G	G	T	G	T	C	G	G	A	C	T	G	C	A	G	G	T	G	T	C	C	A	T	T	G	C	C	G	A	T	T	C	T	C	A
ACC 1286::IRGC 60116-1::[IRIS 313-11585]	IRIS 313-11585	IRGC 127104	ind1A	11	C	G	G	G	C	C	A	A	C	A	G	G	T	G	T	C	G	G	A	C	T	G	C	A	G	G	T	G	T	C	C	A	T	T	G	C	C	G	A	T	T	C	T	C	A
MR 69::IRGC 60188-1::[IRIS 313-11588]	IRIS 313-11588	IRGC 127636	ind3	11	C	G	G	G	C	C	A	A	C	A	G	G	T	G	T	C	G	G	A	C	T	G	C	A	G	G	T	G	T	C	C	A	T	T	G	C	C	G	A	T	T	C	T	C	A
CHAN THANH HOA::IRGC 60647-1::[IRIS 313-11594]	IRIS 313-11594	IRGC 127259	indx	11	C	G	G	G	C	C	A	A	C	A	G	G	T	G	T	C		G	A	C	T	G	C	A	G	G	T	G	T	C	C	A	T	T	G	C	C	G	A	T	T	C	T	C	A
BHATA PYAGI::IRGC 60895-1::[IRIS 313-11597]	IRIS 313-11597	IRGC 127222	ind2	11	C	G	G	G	C	C	A	A	C	A	G	G	T	G	T	C	G	G	A	C	T	G	C	A	G	G	T	G	T	C	C	A	T	T	G	C	C	G	A	T	T	C	T	C	A
BOKDEL::IRGC 61085-1::[IRIS 313-11606]	IRIS 313-11606	IRGC 127233	ind2	11	C	G	G	G	C	C	A	A	C	A	G	G	T	G	T	C	G	G	A	C	T	G	C	A	G	G	T	G	T	C	C	A	T	T	G	C	C	G	A	T	T	C	T	C	A
HOLDIGANTHI::IRGC 61105-1::[IRIS 313-11607]	IRIS 313-11607	IRGC 127411	ind2	12	C	G	G	G	C	C	A	A	C	A	G	G	T	G	T	C	G	G	A	C	T	G	C	A	G	G	T	G	T	C	C	A	T	T	G	C	C	G	A	T	T	C	T	C	A
MANARE (PHOM)::IRGC 61437-1::[IRIS 313-11615]	IRIS 313-11615	IRGC 132408	ind3	11	C	G	G	G	C	C	A	A	C	A	G	G	T	G	T	C	G	G	A	C	T	G	C	A	G	G	T	G	T	C	C	A	T	T	G	C	C	G	A	T	T	C	T	C	A
UPRH 265::IRGC 61689-1::[IRIS 313-11621]	IRIS 313-11621	IRGC 127877	indx	11	C	G	G	G	C	C	A	A	C	A	G	G	T	G	T	C	G	G	A	C	T	G	C	A	G	G	T	G	T	C	C	A	T	T	G	C	C	G	A	T	T	C	T	C	A
JUAN YE LAI::IRGC 61825-1::[IRIS 313-11622]	IRIS 313-11622	IRGC 127467	ind1A	12	C	G	G	G	C	C	A	A	C	A	G	G	T	G	T	C	G	G	A	C	T	G	C	A	G	G	T	G	T	C	C	A	T	T	G	C	C	G	A	T	T	C	T	C	A
ANADI WHITE::IRGC 61897-1::[IRIS 313-11624]	IRIS 313-11624	IRGC 127122	ind1A	11	C	G	G	G	C	C	A	A	C	A	G	G	T	G	T	C	G	G	A	C	T	G	C	A	G	G	T	G	T	C	C	A	T	T	G	C	C	G	A	T	T	C	T	C	A
NCS 477::IRGC 62299-1::[IRIS 313-11641]	IRIS 313-11641	IRGC 127659	ind2	11	C	G	G	G	C	C	A	A	C	A	G	G	T	G	T	C	G	G	A	C	T	G	C	A	G	G	T	G	T	C	C	A	T	T	G	C	C	G	A	T	T	C	T	C	A
NCS 603 B::IRGC 62377-1::[IRIS 313-11643]	IRIS 313-11643	IRGC 127662	ind1B	11	C	G	G	G	C	C	A	A	C	A	G	G	T	G	T	C	G	G	A	C	T	G	C	A	G	G	T	G	T	C	C	A	T	T	G	C	C	G	A	T	T	C	T	C	A
FEI ZHAO 12::IRGC 62683-1::[IRIS 313-11651]	IRIS 313-11651	IRGC 128291	temp	11	C	G	G	G	C	C	A	A	C	A	G	G	T	G	T	C	G	G	A	C	T	G	C	A	G	G	T	G	T	C	C	A	T	T	G	C	C	G	A	T	T	C	T	C	A
SI WAN 14::IRGC 63019-1::[IRIS 313-11655]	IRIS 313-11655	IRGC 127815	temp	11	C	G	G	G	C	C	A	A	C	A	G	G	T	G	T	C	G	G	A	C	T	G	C	A	G	G	T	G	T	C	C	A	T	T	G	C	C	G	A	T	T	C	T	C	A
B 3913 B 16-20 ST 28::IRGC 63099-1::[IRIS 313-11656]	IRIS 313-11656	IRGC 127196	indx	11	C	G	G	G	C	C	A	A	C	A	G	G	T	G	T	C	G	G	A	C	T	G	C	A	G	G	T	G	T	C	C	A	T	T	G	C	C	G	A	T	T	C	T	C	A
EX WUKARI (WILD)::IRGC 63214-1::[IRIS 313-11657]	IRIS 313-11657		ind2	11	C	G	G	G	C	C	A	A	C	A	G	G	T	G	T	C	G	G	A	C	T	G	C	A	G	G	T	G	T	C	C	A	T	T	G	C	C	G	A	T	T	C	T	C	A
CUN GU NUO::IRGC 63576-1::[IRIS 313-11664]	IRIS 313-11664	IRGC 127288	indx	11	C	G	G	G	C	C	A	A	C	A	G	G	T	G	T	C	G	G	A	C	T	G	C	A	G	G	T	G	T	C	C	A	T	T	G	C	C	G	A	T	T	C	T	C	A
LUO AI ZAO 3::IRGC 63730-1::[IRIS 313-11667]	IRIS 313-11667	IRGC 127580	ind1A	11	C	G	G	G	C	C	A	A	C	A	G	G	T	G	T	C	G	G	A	C	T	G	C	A	G	G	T	G	T	C	C	A	T	T	G	C	C	G	A	T	T	C	T	C	A
F 478::IRGC 63882-1::[IRIS 313-11669]	IRIS 313-11669	IRGC 131986	indx	11	C	G	G	G	C	C	A	A	C	A	G	G	T	G	T	C	G	G	A	C	T	G	C	A	G	G	T	G	T	C	C	A	T	T	G	C	C	G	A	T	T	C	T	C	A
BEUA KAE::IRGC 64221-1::[IRIS 313-11674]	IRIS 313-11674	IRGC 131971	ind3	11	C	G	G	G	C	C	A	A	C	A	G	G	T	G	T	C	G	G	A	C	T	G	C	A	G	G	T	G	T	C	C	A	T	T	G	C	C	G	A	T	T	C	T	C	A
KHAO' PAWM::IRGC 64416-2::[IRIS 313-11681]	IRIS 313-11681	IRGC 132426	ind3	11	C	G	G	G	C	C	A	A	C	A	G	G	T	G	T	C	G	G	A	C	T	G	C	A	G	G	T	G	T	C	C	A	T	T	G	C	C	G	A	T	T	C	T	C	A
OB CHUEY::IRGC 64568-1::[IRIS 313-11684]	IRIS 313-11684	IRGC 132021	ind3	11	C	G	G	G	C	C	A	A	C	A	G	G	T	G	T	C	G	G	A	C	T	G	C	A	G	G	T	G	T	C	C	A	T	T	G	C	C	G	A	T	T	C	T	C	A
CHIAYI WU-K'O::IRGC 64974-1::[IRIS 313-11692]	IRIS 313-11692	IRGC 127273	ind1A	11	C	G	G	G	C	C	A	A	C	A	G	G	T	G	T	C	G	G	A	C	T	G	C	A	G	G	T	G	T	C	C	A	T	T	G	C	C	G	A	T	T	C	T	C	A
CHING LIU::IRGC 65018-1::[IRIS 313-11694]	IRIS 313-11694	IRGC 127279	indx	11	C	G	G	G	C	C	A	A	C	A	G	G	T	G	T	C	G	G	A	C	T	G	C	A	G	G	T	G	T	C	C	A	T	T	G	C	C	G	A	T	T	C	T	C	A
HSIN-T'AO YUAN CHING YU::IRGC 65074-1::[IRIS 313-11695]	IRIS 313-11695	IRGC 127421	ind1A	11	C	G	G	G	C	C	A	A	C	A	G	G	T	G	T	C	G	G	A	C	T	G	C	A	G	G	T	G	T	C	C	A	T	T	G	C	C	G	A	T	T	C	T	C	A
LEUANG KHAJAWN::IRGC 66014-1::[IRIS 313-11709]	IRIS 313-11709	IRGC 132010	ind3	11	C	G	G	G	C	C	A	A	C	A	G	G	T	G	T	C	G	G	A	C	T	G	C	A	G	G	T	G	T	C	C	A	T	T	G	C	C	G	A	T	T	C	T	C	A
KONYAN::IRGC 66931-1::[IRIS 313-11724]	IRIS 313-11724	IRGC 127531	ind3	11	C	G	G	G	C	C	A	A	C	A	G	G	T	G	T	C	G	G	A	C	T	G	C	A	G	G	T	G	T	C	C	A	T	T	G	C	C	G	A	T	T	C	T	C	A
GUANG QING 334::IRGC 67132-1::[IRIS 313-11726]	IRIS 313-11726	IRGC 127393	ind1A	11	C	G	G	G	C	C	A	A	C	A	G	G	T	G	T	C	G	G	A	C	T	G	C	A	G	G	T	G	T	C	C	A	T	T	G	C	C	G	A	T	T	C	T	C	A
LUO SI ZHAN::IRGC 67211-1::[IRIS 313-11728]	IRIS 313-11728	IRGC 127581	ind3	11	C	G	G	G	C	C	A	A	C	A	G	G	T	G	T	C	G	G	A	C	T	G	C	A	G	G	T	G	T	C	C	A	T	T	G	C	C	G	A	T	T	C	T	C	A
MEI LIU ZAO 5::IRGC 67231-1::[IRIS 313-11729]	IRIS 313-11729	IRGC 127622	indx	11	C	G	G	G	C	C	A	A	C	A	G	G	T	G	T	C	G	G	A	C	T	G	C	A	G	G	T	G	T	C	C	A	T	T	G	C	C	G	A	T	T	C	T	C	A
QING ER XIAO 2::IRGC 67255-1::[IRIS 313-11730]	IRIS 313-11730	IRGC 127753	indx	11	C	G	G	G	C	C	A	A	C	A	G	G	T	G	T	C	G	G	A	C	T	G	C	A	G	G	T	G	T	C	C	A	T	T	G	C	C	G	A	T	T	C	T	C	A
QING TAI AI::IRGC 67273-1::[IRIS 313-11731]	IRIS 313-11731	IRGC 127754	indx	11	C	G	G	G	C	C	A	A	C	A	G	G	T	G	T	C	G	G	A	C	T	G	C	A	G	G	T	G	T	C	C	A	T	T	G	C	C	G	A	T	T	C	T	C	A
SHUANG BAI AI 2::IRGC 67309-1::[IRIS 313-11733]	IRIS 313-11733	IRGC 127801	ind1A	11	C	G	G	G	C	C	A	A	C	A	G	G	T	G	T	C	G	G	A	C	T	G	C	A	G	G	T	G	T	C	C	A	T	T	G	C	C	G	A	T	T	C	T	C	A
SI CHAO 1::IRGC 67335-1::[IRIS 313-11734]	IRIS 313-11734	IRGC 127803	ind1A	11	C	G	G	G	C	C	A	A	C	A	G	G	T	G	T	C	G	G	A	C	T	G	C	A	G	G	T	G	T	C	C	A	T	T	G	C	C	G	A	T	T	C	T	C	A
YI LI ZHONG::IRGC 67382-1::[IRIS 313-11735]	IRIS 313-11735	IRGC 127904	indx	11	C	G	G	G	C	C	A	A	C	A	G	G	T	G	T	C	G	G	A	C	T	G	C	A	G	G	T	G	T	C	C	A	T	T	G	C	C	G	A	T	T	C	T	C	A
UGAGA::IRGC 67604-1::[IRIS 313-11740]	IRIS 313-11740	IRGC 127872	indx	11	C	G	G	G	C	C	A	A	C	A	G	G	T	G	T	C	G	G	A	C	T	G	C	A	G	G	T	G	T	C	C	A	T	T	G	C	C	G	A	T	T	C	T	C	A
AI JIAO AO FAN ZI::IRGC 67871-1::[IRIS 313-11744]	IRIS 313-11744	IRGC 127114	indx	11	C	G	G	G	C	C	A	A	C	A	G	G	T	G	T	C	G	G	A	C	T	G	C	A	G	G	T	G	T	C	C	A	T	T	G	C	C	G	A	T	T	C	T	C	A
E 2070::IRGC 67981-1::[IRIS 313-11746]	IRIS 313-11746	IRGC 127349	ind1A	11	C	G	G	G	C	C	A	A	C	A	G	G	T	G	T	C	G	G	A	C	T	G	C	A	G	G	T	G	T	C	C	A	T	T	G	C	C	G	A	T	T	C	T	C	A
E 4197::IRGC 68004-1::[IRIS 313-11747]	IRIS 313-11747	IRGC 127350	indx	11	C	G	G	G	C	C	A	A	C	A	G	G	T	G	T	C	G	G	A	C	T	G	C	A	G	G	T	G	T	C	C	A	T	T	G	C	C	G	A	T	T	C	T	C	A
GAO JIAO YING GAN ZHAN::IRGC 68053-1::[IRIS 313-11748]	IRIS 313-11748	IRGC 127378	indx	11	C	G	G	G	C	C	A	A	C	A	G	G	T	G	T	C	G	G	A	C	T	G	C	A	G	G	T	G	T	C	C	A	T	T	G	C	C	G	A	T	T	C	T	C	A
L 10595::IRGC 68109-1::[IRIS 313-11750]	IRIS 313-11750	IRGC 127538	indx	11	C	G	G	G	C	C	A	A	C	A	G	G	T	G	T	C	G	G	A	C	T	G	C	A	G	G	T	G	T	C	C	A	T	T	G	C	C	G	A	T	T	C	T	C	A
L 10833::IRGC 68121-1::[IRIS 313-11751]	IRIS 313-11751	IRGC 127539	indx	11	C	G	G	G	C	C	A	A	C	A	G	G	T	G	T	C	G	G	A	C	T	G	C	A	G	G	T	G	T	C	C	A	T	T	G	C	C	G	A	T	T	C	T	C	A
M 6034-1::IRGC 68193-1::[IRIS 313-11752]	IRIS 313-11752	IRGC 127584	ind1A	12	C	G	G	G	C	C	A	A	C	A	G	G	T	G	T	C	G	G	A	C	T	G	C	A	G	G	T	G	T	C	C	A	T	T	G	C	C	G	A	T	T	C	T	C	A
XIANG CHANG ZAO::IRGC 68268-1::[IRIS 313-11753]	IRIS 313-11753	IRGC 127894	ind1A	11.5	C	G	G	G	C	C	A	A	C	A	G	G	T	G	T	C	G	G	A	C	T	G	C	A	G	G	T	G	T	C	C	A	T	T	G	C	C	G	A	T	T	C	T	C	A
AMBOHIMANDAY::IRGC 68330-1::[IRIS 313-11754]	IRIS 313-11754	IRGC 128214	admix	11	C	G	G	G	C	C	A	A	C	A	G	G	T	G	T	C	G	G	A	C	T	G	C	A	G	G	T	G	T	C	C	A	T	T	G	C	C	G	A	T	T	C	T	C	A
P 41::IRGC 68987-1::[IRIS 313-11764]	IRIS 313-11764	IRGC 127697	ind3	11	C	G	G	G	C	C	A	A	C	A	G	G	T	G	T	C	G	G	A	C	T	G	C	A	G	G	T	G	T	C	C	A	T	T	G	C	C	G	A	T	T	C	T	C	A
ROJON'NY NTAOLO::IRGC 69410-1::[IRIS 313-11772]	IRIS 313-11772	IRGC 128452	ind2	11	C	G	G	G	C	C	A	A	C	A	G	G	T	G	T	C	G	G	A	C	T	G	C	A	G	G	T	G	T	C	C	A	T	T	G	C	C	G	A	T	T	C	T	C	A
AUS 78-125::IRGC 69464-1::[IRIS 313-11773]	IRIS 313-11773	IRGC 132275	ind3	11	C	G	G	G	C	C	A	A	C	A	G	G	T	G	T	C	G	G	A	C	T	G	C	A	G	G	T	G	T	C	C	A	T	T	G	C	C	G	A	T	T	C	T	C	A
MBEIMBEIHUN::IRGC 69730-1::[IRIS 313-11784]	IRIS 313-11784	IRGC 127619	ind1B	11	C	G	G	G	C	C	A	A	C	A	G	G	T	G	T	C	G	G	A	C	T	G	C	A	G	G	T	G	T	C	C	A	T	T	G	C	C	G	A	T	T	C	T	C	A
N'YA NOFF::IRGC 69749-1::[IRIS 313-11786]	IRIS 313-11786	IRGC 128411	ind3	11	C	G	G	G	C	C	A	A	C	A	G	G	T	G	T	C	G	G	A	C	T	G	C	A	G	G	T	G	T	C	C	A	T	T	G	C	C	G	A	T	T	C	T	C	A
TANDAKAY FINGO::IRGC 69793-1::[IRIS 313-11787]	IRIS 313-11787	IRGC 127845	ind2	11	C	G	G	G	C	C	A	A	C	A	G	G	T	G	T	C	G	G	A	C	T	G	C	A	G	G	T	G	T	C	C	A	T	T	G	C	C	G	A	T	T	C	T	C	A
VARY LAHY::IRGC 69908-1::[IRIS 313-11791]	IRIS 313-11791	IRGC 127885	ind2	11	C	G	G	G	C	C	A	A	C	A	G	G	T	G	T	C	G	G	A	C	T	G	C	A	G	G	T	G	T	C	C	A	T	T	G	C	C	G	A	T	T	C	T	C	A
E ZI 100::IRGC 70192-1::[IRIS 313-11798]	IRIS 313-11798	IRGC 127365	ind1B	11	C	G	G	G	C	C	A	A	C	A	G	G	T	G	T	C	G	G	A	C	T	G	C	A	G	G	T	G	T	C	C	A	T	T	G	C	C	G	A	T	T	C	T	C	A
E ZI 110::IRGC 70201-1::[IRIS 313-11799]	IRIS 313-11799	IRGC 127366	ind1A	11	C	G	G	G	C	C	A	A	C	A	G	G	T	G	T	C	G	G	A	C	T	G	C	A	G	G	T	G	T	C	C	A	T	T	G	C	C	G	A	T	T	C	T	C	A
FAN WU::IRGC 70245-1::[IRIS 313-11801]	IRIS 313-11801	IRGC 127368	indx	11	C	G	G	G	C	C	A	A	C	A	G	G	T	G	T	C	G	G	A	C	T	G	C	A	G	G	T	G	T	C	C	A	T	T	G	C	C	G	A	T	T	C	T	C	A
QUN XUAN ZAO::IRGC 70371-1::[IRIS 313-11804]	IRIS 313-11804	IRGC 128441	ind1A	11	C	G	G	G	C	C	A	A	C	A	G	G	T	G	T	C	G	G	A	C	T	G	C	A	G	G	T	G	T	C	C	A	T	T	G	C	C	G	A	T	T	C	T	C	A
ZERO::IRGC 70707-2::[IRIS 313-11813]	IRIS 313-11813	IRGC 132372	ind3	11	C	G	G	G	C	C	A	A	C	A	G	G	T	G	T	C	G	G	A	C	T	G	C	A	G	G	T	G	T	C	C	A	T	T	G	C	C	G	A	T	T	C	T	C	A
MOSHI::IRGC 70730-1::[IRIS 313-11815]	IRIS 313-11815	IRGC 127633	ind3	11	C	G	G	G	C	C	A	A	C	A	G	G	T	G	T	C	G	G	A	C	T	G	C	A	G	G	T	G	T	C	C	A	T	T	G	C	C	G	A	T	T	C	T	C	A
KARILETYONE::IRGC 70745-1::[IRIS 313-11816]	IRIS 313-11816	IRGC 127493	indx	12	C	G	G	G	C	C	A	A	C	A	G	G	T	G	T	C	G	G	A	C	T	G	C	A	G	G	T	G	T	C	C	A	T	T	G	C	C	G	A	T	T	C	T	C	A
BHONDU PAREWA::IRGC 70802-1::[IRIS 313-11822]	IRIS 313-11822	IRGC 135738	ind2	11	C	G	G	G	C	C	A	A	C	A	G	G	T	G	T	C	G	G	A	C	T	G	C	A	G	G	T	G	T	C	C	A	T	T	G	C	C	G	A	T	T	C	T	C	A
DHANIYA PHOOL::IRGC 70811-1::[IRIS 313-11824]	IRIS 313-11824	IRGC 127317	ind2	11	C	G	G	G	C	C	A	A	C	A	G	G	T	G	T	C	G	G	A	C	T	G	C	A	G	G	T	G	T	C	C	A	T	T	G	C	C	G	A	T	T	C	T	C	A
AE WAWNG POO DOO::IRGC 71007-1::[IRIS 313-11832]	IRIS 313-11832	IRGC 131964	subtrop	11	C	G	G	G	C	C	A	A	C	A	G	G	T	G	T	C	G	G	A	C	T	G	C	A	G	G	T	G	T	C	C	A	T	T	G	C	C	G	A	T	T	C	T	C	A
KHAO KO RAOH::IRGC 71208-1::[IRIS 313-11836]	IRIS 313-11836	IRGC 132000	ind3	11	C	G	G	G	C	C	A	A	C	A	G	G	T	G	T	C	G	G	A	C	T	G	C	A	G	G	T	G	T	C	C	A	T	T	G	C	C	G	A	T	T	C	T	C	A
PAN DAWK MAHK::IRGC 71380-1::[IRIS 313-11843]	IRIS 313-11843	IRGC 132290	ind3	11	C	G	G	G	C	C	A	A	C	A	G	G	T	G	T	C	G	G	A	C	T	G	C	A	G	G	T	G	T	C	C	A	T	T	G	C	C	G	A	T	T	C	T	C	A
PUEY TAW::IRGC 71405-1::[IRIS 313-11844]	IRIS 313-11844	IRGC 127745	ind3	11	C	G	G	G	C	C	A	A	C	A	G	G	T	G	T	C	G	G	A	C	T	G	C	A	G	G	T	G	T	C	C	A	T	T	G	C	C	G	A	T	T	C	T	C	A
TON TIA GUAY NU::IRGC 71467-1::[IRIS 313-11846]	IRIS 313-11846	IRGC 132048	subtrop	11	C	G	G	G	C	C	A	A	C	A	G	G	T	G	T	C	G	G	A	C	T	G	C	A	G	G	T	G	T	C	C	A	T	T	G	C	C	G	A	T	T	C	T	C	A
PULUT BURUNG::IRGC 71655-1::[IRIS 313-11848]	IRIS 313-11848	IRGC 132037	ind3	10.5	C	G	G	G	C	C	A	A	C	A	G	G	T	G	T	C	G	G	A	C	T	G	C			G	T	G	T	C	C	A	T	T	G	C	C	G	A			C		C	A
BAI MI ZAI 7::IRGC 71940-1::[IRIS 313-11852]	IRIS 313-11852	IRGC 127202	ind1A	11	C	G	G	G	C	C	A	A	C	A	G	G	T	G	T	C	G	G	A	C	T	G	C	A	G	G	T	G	T	C	C	A	T	T	G	C	C	G	A	T	T	C	T	C	A
BU ZHI MING::IRGC 71971-1::[IRIS 313-11853]	IRIS 313-11853	IRGC 127242	ind1A	11	C	G	G	G	C	C	A	A	C	A	G	G	T	G	T	C	G	G	A	C	T	G	C	A	G	G	T	G	T	C	C	A	T	T	G	C	C	G	A	T	T	C	T	C	A
CHI GU::IRGC 71988-1::[IRIS 313-11854]	IRIS 313-11854	IRGC 127276	ind1A	11	C	G	G	G	C	C	A	A	C	A	G	G	T	G	T	C	G	G	A	C	T	G	C	A	G	G	T	G	T	C	C	A	T	T	G	C	C	G	A	T	T	C	T	C	A
DA GUAN YIN ZHAN::IRGC 72006-1::[IRIS 313-11855]	IRIS 313-11855	IRGC 127292	ind1A	11	C	G	G	G	C	C	A	A	C	A	G	G	T	G	T	C	G	G	A	C	T	G	C	A	G	G	T	G	T	C	C	A	T	T	G	C	C	G	A	T	T	C	T	C	A
DA HEI GU::IRGC 72009-1::[IRIS 313-11856]	IRIS 313-11856	IRGC 127293	ind1A	11	C	G	G	G	C	C	A	A	C	A	G	G	T	G	T	C	G	G	A	C	T	G	C	A	G	G	T	G	T	C	C	A	T	T	G	C	C	G	A	T	T	C	T	C	A
DA LI BAI 63::IRGC 72016-1::[IRIS 313-11857]	IRIS 313-11857	IRGC 127294	ind1A	11	C	G	G	G	C	C	A	A	C	A	G	G	T	G	T	C	G	G	A	C	T	G	C	A	G	G	T	G	T	C	C	A	T	T	G	C	C	G	A	T	T	C	T	C	A
DA TIE ZHAN::IRGC 72029-1::[IRIS 313-11858]	IRIS 313-11858	IRGC 127300	ind1A	11	C	G	G	G	C	C	A	A	C	A	G	G	T	G	T	C	G	G	A	C	T	G	C	A	G	G	T	G	T	C	C		T	T	G	C	C	G	A	T	T	C	T	C	A
GUA PAI GU::IRGC 72078-1::[IRIS 313-11860]	IRIS 313-11860	IRGC 127394	ind1A	11	C	G	G	G	C	C	A	A	C	A	G	G	T	G	T	C	G	G	A	C	T	G	C	A	G	G	T	G	T	C	C	A	T	T	G	C	C	G	A	T	T	C	T	C	A
HEI YAN ZHAN::IRGC 72090-1::[IRIS 313-11861]	IRIS 313-11861	IRGC 127405	ind1A	11	C	G	G	G	C	C	A	A	C	A	G	G	T	G	T	C	G	G	A	C	T	G	C	A	G	G	T	G	T	C	C	A	T	T	G	C	C	G	A	T	T	C	T	C	A
HENG YE ZAO::IRGC 72092-1::[IRIS 313-11862]	IRIS 313-11862	IRGC 127406	ind1A	11	C	G	G	G	C	C	A	A	C	A	G	G	T	G	T	C	G	G	A	C	T	G	C	A	G	G	T	G	T	C	C	A	T	T	G	C	C	G	A	T	T	C	T	C	A
HONG DU BAI::IRGC 72098-1::[IRIS 313-11863]	IRIS 313-11863	IRGC 127413	ind1A	12	C	G	G	G	C	C	A	A	C	A	G	G	T	G	T	C	G	G	A	C	T	G	C	A	G	G	T	G	T	C	C	A	T	T	G	C	C	G	A	T	T	C	T	C	A
JIANG ER ZAO::IRGC 72152-1::[IRIS 313-11866]	IRIS 313-11866	IRGC 127458	ind1A	11	C	G	G	G	C	C	A	A	C	A	G	G	T	G	T	C	G	G	A	C	T	G	C	A	G	G	T	G	T	C	C	A	T	T	G	C	C	G	A	T	T	C	T	C	A
KE SHU BAI::IRGC 72183-1::[IRIS 313-11867]	IRIS 313-11867	IRGC 127503	ind1A	11	C	G	G	G	C	C	A	A	C	A	G	G	T	G	T	C	G	G	A	C	T	G	C	A	G	G	T	G	T	C	C	A	T	T	G	C	C	G	A	T	T	C	T	C	A
LIU LI YOU::IRGC 72198-1::[IRIS 313-11868]	IRIS 313-11868	IRGC 127569	ind1A	11	C	G	G	G	C	C	A	A	C	A	G	G	T	G	T	C	G	G	A	C	T	G	C	A	G	G	T	G	T	C	C	A	T	T	G	C	C	G	A	T	T	C	T	C	A
MA WEI ZHAN::IRGC 72220-1::[IRIS 313-11869]	IRIS 313-11869	IRGC 127615	ind1A	11	C	G	G	G	C	C	A	A	C	A	G	G	T	G	T	C	G	G	A	C	T	G	C	A	G	G	T	G	T	C	C	A	T	T	G	C	C	G	A	T	T	C	T	C	A
NAN JING XIAO DAO::IRGC 72236-2::[IRIS 313-11870]	IRIS 313-11870	IRGC 132429	ind1A	11	C	G	G	G	C	C	A	A	C	A	G	G	T	G	T	C	G	G	A	C	T	G	C	A	G	G	T	G	T	C	C	A	T	T	G	C	C	G	A	T	T	C	T	C	A
AI DA::IRGC 72567-1::[IRIS 313-11876]	IRIS 313-11876	IRGC 127113	ind1A	11	C	G	G	G	C	C	A	A	C	A	G	G	T	G	T	C	G	G	A	C	T	G	C	A	G	G	T	G	T	C	C	A	T	T	G	C	C	G	A	T	T	C	T	C	A
AN NAN ZAO::IRGC 72576-1::[IRIS 313-11877]	IRIS 313-11877	IRGC 127125	ind1A	11	C	G	G	G	C	C	A	A	C	A	G	G	T	G	T	C	G	G	A	C	T	G	C	A	G	G	T	G	T	C	C	A	T	T	G	C	C	G	A	T	T	C	T	C	A
BAI RI XIAN::IRGC 72588-1::[IRIS 313-11878]	IRIS 313-11878	IRGC 127203	ind1A	11	C	G	G	G	C	C	A	A	C	A	G	G	T	G	T	C	G	G	A	C	T	G	C	A	G	G	T	G	T	C	C	A	T	T	G	C	C	G	A	T	T	C	T	C	A
LIU TIAO XIAN::IRGC 72758-1::[IRIS 313-11881]	IRIS 313-11881	IRGC 127570	ind1A	11	C	G	G	G	C	C	A	A	C	A	G	G	T	G	T	C	G	G	A	C	T	G	C	A	G	G	T	G	T	C	C	A	T	T	G	C	C	G	A	T	T	C	T	C	A
MAN TIAN QING::IRGC 72776-1::[IRIS 313-11882]	IRIS 313-11882	IRGC 127605	ind1A	11	C	G	G	G	C	C	A	A	C	A	G	G	T	G	T	C	G	G	A	C	T	G	C	A	G	G	T	G	T	C	C	A	T	T	G	C	C	G	A	T	T	C	T	C	A
YANG WAN XIAN::IRGC 72886-1::[IRIS 313-11885]	IRIS 313-11885	IRGC 127899	ind1A	11	C	G	G	G	C	C	A	A	C	A	G	G	T	G	T	C	G	G	A	C	T	G	C	A	G	G	T	G	T	C	C	A	T	T	G	C	C	G	A	T	T	C	T	C	A
MURGI BRINJ::IRGC 73109-1::[IRIS 313-11889]	IRIS 313-11889	IRGC 127639	indx	11	C	G	G	G	C	C	A	A	C	A		G	T	G	T	C	G	G	A	C	T	G	C	A	G	G	T	G	T	C	C	A	T	T	G	C	C	G	A	T	T	C	T	C	A
C 722323::IRGC 73147-1::[IRIS 313-11890]	IRIS 313-11890	IRGC 128252	temp	11	C	G	G	G	C	C	A	A	C	A	G	G	T	G	T	C	G	G	A	C	T	G	C	A	G	G	T	G	T	C	C	A	T	T	G	C	C	G	A	T	T	C	T	C	A
KHAU DANH::IRGC 73201-1::[IRIS 313-11893]	IRIS 313-11893	IRGC 127519	indx	11	C	G	G	G	C	C	A	A	C	A	G	G	T	G	T	C	G	G	A	C	T	G	C	A	G	G	T	G	T	C	C	A	T	T	G	C	C	G	A	T	T	C	T	C	A
BA TUC RAN::IRGC 73239-1::[IRIS 313-11895]	IRIS 313-11895	IRGC 132391	ind3	11	C	G	G	G	C	C	A	A	C	A	G	G	T	G	T	C	G	G	A	C	T	G	C	A	G	G	T	G	T	C	C	A	T	T	G	C	C	G	A	T	T	C	T	C	A
CA HIM::IRGC 73246-1::[IRIS 313-11896]	IRIS 313-11896	IRGC 132394	ind3	11	C	G	G	G	C	C	A	A	C	A	G	G	T	G	T	C	G	G	A	C	T	G	C	A	G	G	T	G	T	C	C	A	T	T	G	C	C	G	A	T	T	C	T	C	A
CEMPO TURI::IRGC 73667-1::[IRIS 313-11902]	IRIS 313-11902	IRGC 127251	ind3	11	C	G	G	G	C	C	A	A	C	A	G	G	T	G	T	C	G	G	A	C	T	G	C	A	G	G	T	G	T	C	C	A	T	T	G	C	C	G	A	T	T	C	T	C	A
PADI SIRANDAH KUNING::IRGC 73762-1::[IRIS 313-11904]	IRIS 313-11904	IRGC 132287	ind3	11	C	G	G	G	C	C	A	A	C	A	G	G	T	G	T	C	G	G	A	C	T	G	C	A	G	G	T	G	T	C	C	A	T	T	G	C	C	G	A	T	T	C	T	C	A
HONG MI JIU GONG JI::IRGC 74031-1::[IRIS 313-11909]	IRIS 313-11909	IRGC 127414	ind1A	11	C	G	G	G	C	C	A	A	C	A	G	G	T	G	T	C	G	G	A	C	T	G	C	A	G	G	T	G	T	C	C	A	T	T	G	C	C	G	A	T	T	C	T	C	A
YU HE HONG::IRGC 74266-1::[IRIS 313-11910]	IRIS 313-11910	IRGC 127907	indx	11	C	G	G	G	C	C	A	A	C	A	G	G	T	G	T	C	G	G	A	C	T	G	C	A	G	G	T	G	T	C	C	A	T	T	G	C	C	G	A	T	T	C	T	C	A
KHAO' NAN::IRGC 74981-1::[IRIS 313-11922]	IRIS 313-11922	IRGC 128340	subtrop	11	C	G	G	G	C	C	A	A	C	A	G	G	T	G	T	C	G	G	A	C	T	G	C	A	G	G	T	G	T	C	C	A		T	G	C	C	G	A	T	T	C	T	C	A
ITA 117::IRGC 75235-1::[IRIS 313-11930]	IRIS 313-11930	IRGC 127444	ind1B	11	C	G	G	G	C	C	A	A	C	A	G	G	T	G	T	C	G	G	A	C	T	G	C	A	G	G	T	G	T	C	C	A	T	T	G	C	C	G	A	T	T	C	T	C	A
KONG KHSACH BANG KATT::IRGC 75350-1::[IRIS 313-11935]	IRIS 313-11935	IRGC 132006	ind3	10.5	C	G	G	G	C	C	A	A	C	A	G	G	T	G	T	C	G	G	A	C	T	G	C	A	G	G	T	G	T	C	C	A	T	T	G	C	C	G	A	T	T	C	T	C	A
KUNJUKUNJU::IRGC 75448-1::[IRIS 313-11937]	IRIS 313-11937	IRGC 127535	indx	11	C	G	G	G	C	C	A	A	C	A	G	G	T	G	T	C		G	A	C	T	G	C	A	G	G	T	G	T	C	C	A	T	T	G	C	C	G	A	T	T	C	T	C	A
MALOBA (DISSI ROUGE)::IRGC 75700-1::[IRIS 313-11940]	IRIS 313-11940	IRGC 127599	indx	11	C	G	G	G	C	C	A	A	C	A	G	G	T	G	T	C	G	G	A	C	T	G	C	A	G	G	T	G	T	C	C	A	T	T	G	C	C	G	A	T	T	C	T	C	A
I 41::IRGC 75927-1::[IRIS 313-11943]	IRIS 313-11943	IRGC 127425	ind1A	11	C	G	G	G	C	C	A	A	C	A	G	G	T	G	T	C	G	G	A	C	T	G	C	A	G	G	T	G	T	C	C	A	T	T	G	C	C	G	A	T	T	C	T	C	A
I 814::IRGC 76028-1::[IRIS 313-11944]	IRIS 313-11944	IRGC 127426	ind1A	11	C	G	G	G	C	C	A	A	C	A	G	G	T	G	T	C	G	G	A	C	T	G	C	A	G	G	T	G	T	C	C	A	T	T	G	C	C	G	A	T	T	C	T	C	A
LIU HE XI HE::IRGC 76661-1::[IRIS 313-11949]	IRIS 313-11949	IRGC 127568	ind1A	11	C	G	G	G	C	C	A	A	C	A	G	G	T	G	T	C	G	G	A	C	T	G	C	A	G	G	T	G	T	C	C	A	T	T	G	C	C	G	A	T	T	C	T	C	A
MI GU::IRGC 76687-1::[IRIS 313-11950]	IRIS 313-11950	IRGC 127626	ind1A	11	C	G	G	G	C	C	A	A	C	A	G	G	T	G	T	C	G	G	A	C	T	G	C	A	G	G	T	G	T	C	C	A	T	T	G	C	C	G	A	T	T	C	T	C	A
SAN BAO GU::IRGC 76732-1::[IRIS 313-11953]	IRIS 313-11953	IRGC 127783	ind1A	11	C	G	G	G	C	C	A	A	C	A	G	G	T	G	T	C	G	G	A	C	T	G	C	A	G	G	T	G	T	C	C	A	T	T	G	C	C	G	A	T	T	C	T	C	A
XIA HONG GU::IRGC 76803-1::[IRIS 313-11954]	IRIS 313-11954	IRGC 128504	ind1A	11	C	G	G	G	C	C	A	A	C	A	G	G	T	G	T	C	G	G	A	C	T	G	C	A	G	G	T	G	T	C	C	A	T	T	G	C	C	G	A	T	T	C	T	C	A
YE DA GU::IRGC 76834-1::[IRIS 313-11955]	IRIS 313-11955	IRGC 127901	ind1A	11	C	G	G	G	C	C	A	A	C	A	G	G	T	G	T	C	G	G	A	C	T	G	C	A	G	G	T	G	T	C	C	A	T	T	G	C	C	G	A	T	T	C	T	C	A
PUANG MAHLAI KHAO::IRGC 76959-1::[IRIS 313-11958]	IRIS 313-11958		ind3	11	C	G	G	G	C	C	A	A	C	A	G	G	T	G	T	C	G	G	A	C	T	G	C	A	G	G	T	G	T	C	C	A	T	T	G	C	C	G	A	T	T	C	T	C	A
KHAO SETTI::IRGC 77084-1::[IRIS 313-11962]	IRIS 313-11962	IRGC 132002	ind3	11	C	G	G	G	C	C	A	A	C	A	G	G	T	G	T	C	G	G	A	C	T	G	C	A	G	G	T	G	T	C	C	A	T	T	G	C	C	G	A	T	T	C	T	C	A
GUANG XUAN LIU HAO::IRGC 77341-1::[IRIS 313-11965]	IRIS 313-11965	IRGC 128304	ind1A	11	C	G	G	G	C	C	A	A	C	A	G	G	T	G	T	C	G	G	A	C	T	G	C	A	G	G	T	G	T	C	C	A	T	T	G	C	C	G	A	T	T	C	T	C	A
TANG DU GU::IRGC 77400-1::[IRIS 313-11967]	IRIS 313-11967	IRGC 127846	indx	11	C	G	G	G	C	C	A	A	C	A	G	G	T	G	T	C	G	G	A	C	T	G	C	A	G	G	T	G	T	C	C	A	T	T	G	C	C	G	A	T	T	C	T	C	A
ZHAO DAN AI::IRGC 77422-1::[IRIS 313-11968]	IRIS 313-11968	IRGC 127913	ind1A	12	C	G	G	G	C	C	A	A	C	A	G	G	T	G	T	C		G	A	C	T	G	C	A	G	G	T	G	T	C	C	A	T	T	G	C	C	G	A	T	T	C	T	C	A
NOINJO::IRGC 77669-1::[IRIS 313-11973]	IRIS 313-11973	IRGC 132020	temp	11	C	G	G	G	C	C	A	A	C	A	G	G	T	G	T	C	G	G	A	C	T	G	C	A	G	G	T	G	T	C	C	A	T	T	G	C	C	G	A	T	T	C	T	C	A
IR 19661-364-1-2-3::IRGC 78061-1::[IRIS 313-11979]	IRIS 313-11979	IRGC 127435	ind1B	11	C	G	G	G	C	C	A	A	C	A	G	G	T	G	T	C	G	G	A	C	T	G	C	A	G	G	T	G	T	C	C	A	T	T	G	C	C	G	A	T	T	C	T	C	A
HSINCHU AI CHIO CHIENG::IRGC 78182-1::[IRIS 313-11980]	IRIS 313-11980	IRGC 127420	ind1A	11	C	G	G	G	C	C	A	A	C	A	G	G	T	G	T	C	G	G	A	C	T	G	C	A	G	G	T	G	T	C	C	A	T	T	G	C	C	G	A	T	T	C	T	C	A
KERIBAREFOR::IRGC 78454-1::[IRIS 313-11983]	IRIS 313-11983	IRGC 128337	ind2	11	C	G	G	G	C	C	A	A	C	A	G	G	T	G	T	C	G	G	A	C	T	G	C	A	G	G	T	G	T	C	C	A	T	T	G	C	C	G	A	T	T	C	T	C	A
LIANG GUANG::IRGC 78551-1::[IRIS 313-11986]	IRIS 313-11986	IRGC 127562	ind1A	12	C	G	G	G	C	C	A	A	C	A	G	G	T	G	T	C	G	G	A	C	T	G	C	A	G	G	T	G	T	C	C	A	T	T	G	C	C	G	A	T	T	C	T	C	A
TAMBAS JANGKOK::IRGC 78724-1::[IRIS 313-11989]	IRIS 313-11989	IRGC 132416	ind3	11	C	G	G	G	C	C	A	A	C	A	G	G	T	G	T	C	G	G	A	C	T	G	C	A	G	G	T	G	T	C	C	A	T	T	G	C	C	G	A	T	T	C	T	C	A
TAISEN GLUTINOUS YU 1157::IRGC 78750-1::[IRIS 313-11990]	IRIS 313-11990	IRGC 127839	ind1B	11	C	G	G	G	C	C	A	A	C	A	G	G	T	G	T	C	G	G	A	C	T	G	C	A	G	G	T	G	T	C	C	A	T	T	G	C	C	G	A	T	T	C	T	C	A
DAMNOEUB KAUN KHMOM::IRGC 79159-1::[IRIS 313-11998]	IRIS 313-11998	IRGC 131980	ind3	10	C	G	G	G	C	C	A	A	C	A	G	G	T	G	T	C	G	G	A	C	T	G	C	A	G	G	T	G	T	C	C	A	T	T	G	C	C	G	A	T	T	C	T	C	A
KAUN TREI::IRGC 79194-1::[IRIS 313-11999]	IRIS 313-11999	IRGC 132281	ind3	11	C	G	G	G	C	C	A	A	C	A	G	G	T	G	T	C	G	G	A	C	T	G	C	A	G	G	T	G	T	C	C	A	T	T	G	C	C	G	A	T	T	C	T	C	A
YAN ZHAN::IRGC 79740-1::[IRIS 313-12010]	IRIS 313-12010	IRGC 127900	ind1A	11	C	G	G	G	C	C	A	A	C	A	G	G	T	G	T	C	G	G	A	C	T	G	C	A	G	G	T	G	T	C	C	A	T	T	G	C	C	G	A	T	T	C	T	C	A
YU TOU ZHONG::IRGC 79749-1::[IRIS 313-12011]	IRIS 313-12011	IRGC 128510	indx	11	C	G	G	G	C	C	A	A	C	A	G	G	T	G	T	C	G	G	A	C	T	G	C	A	G	G	T	G	T	C	C	A	T	T	G	C	C	G	A	T	T	C	T	C	A
EX AUBERGE::IRGC 79898-1::[IRIS 313-12016]	IRIS 313-12016	IRGC 135751	indx	11	C	G	G	G	C	C	A	A	C	A	G	G	T	G	T	C	G	G	A	C	T	G	C	A	G	G	T	G	T	C	C	A	T	T	G	C	C	G	A	T	T	C	T	C	A
EX SANDEMA::IRGC 79964-1::[IRIS 313-12017]	IRIS 313-12017	IRGC 127364	indx	11	C	G	G	G	C	C	A	A	C	A	G	G	T	G	T	C	G	G	A	C	T	G	C	A	G	G	T	G	T	C	C	A	T	T	G	C	C	G	A	T	T	C	T	C	A
TOS 9795::IRGC 80142-1::[IRIS 313-12024]	IRIS 313-12024	IRGC 127866	ind1B	11	C	G	G	G	C	C	A	A	C	A	G	G	T	G	T	C	G	G	A	C	T	G	C	A	G	G	T	G	T	C	C	A	T	T	G	C	C	G	A	T	T	C	T	C	A
CHAO BONG::IRGC 80266-2::[IRIS 313-12028]	IRIS 313-12028	IRGC 132328	indx	11	C	G	G	G	C	C	A	A	C	A	G	G	T	G	T	C	G	G	A	C	T	G	C	A	G	G	T	G	T	C	C	A	T	T	G	C	C	G	A	T	T	C	T	C	A
CHAN LEUY::IRGC 81223-1::[IRIS 313-12036]	IRIS 313-12036	IRGC 132277	ind3	11	C	G	G	G	C	C	A	A	C	A	G	G	T	G	T	C	G	G	A	C	T	G	C	A	G	G	T	G	T	C	C	A	T	T	G	C	C	G	A	T	T	C	T	C	A
KHMAO KDET::IRGC 81278-1::[IRIS 313-12037]	IRIS 313-12037	IRGC 132404	ind3	11	C	G	G	G	C	C	A	A	C	A	G	G	T	G	T	C	G	G	A	C	T	G	C	A	G	G	T	G	T	C	C	A	T	T	G	C	C	G	A	T	T	C	T	C	A
MUOY KUM::IRGC 81314-1::[IRIS 313-12038]	IRIS 313-12038	IRGC 135571	ind3	11	C	G	G	G	C	C	A	A	C	A	G	G	T	G	T	C	G	G	A	C	T	G	C	A	G	G	T	G	T	C	C	A	T	T	G	C	C	G	A	T	T	C	T	C	A
NEANG AN::IRGC 81315-1::[IRIS 313-12039]	IRIS 313-12039	IRGC 135572	ind3	11	C	G	G	G	C	C	A	A	C	A	G	G	T	G	T	C	G	G	A	C	T	G	C	A	G	G	T	G	T	C	C	A	T	T	G	C	C	G	A	T	T	C	T	C	A
NEANG LAU::IRGC 81328-1::[IRIS 313-12040]	IRIS 313-12040	IRGC 132285	ind3	11	C	G	G	G	C	C	A	A	C	A	G	G	T	G	T	C	G	G	A	C	T	G	C	A	G	G	T	G	T	C	C	A	T	T	G	C	C	G	A	T	T	C	T	C	A
NOU::IRGC 81352-1::[IRIS 313-12041]	IRIS 313-12041	IRGC 132413	ind3	11	C	G	G	G	C	C	A	A	C	A	G	G	T	G	T	C	G	G	A	C	T	G	C	A	G	G	T	G	T	C	C	A	T	T	G	C	C	G	A	T	T	C	T	C	A
PHCAR KABAS::IRGC 81357-1::[IRIS 313-12042]	IRIS 313-12042	IRGC 132031	ind3	11	C	G	G	G	C	C	A	A	C	A	G	G	T	G	T	C	G	G	A	C	T	G	C	A	G	G	T	G	T	C	C	A	T	T	G	C	C	G	A	T	T	C	T	C	A
SAR SIEM::IRGC 81386-2::[IRIS 313-12044]	IRIS 313-12044	IRGC 135641	ind3	11	C	G	G	G	C	C	A	A	C	A	G	G	T	G	T	C	G	G	A	C	T	G	C	A	G	G	T	G	T	C	C	A	T	T	G	C	C	G	A	T	T	C	T	C	A
KUJAM KURIT::IRGC 81477-1::[IRIS 313-12046]	IRIS 313-12046	IRGC 132282	ind3	11	C	G	G	G	C	C	A	A	C	A	G	G	T	G	T	C	G	G	A	C	T	G	C	A	G	G	T	G	T	C	C	A	T	T	G	C	C	G	A	T	T	C	T	C	A
LEMAK RUSA::IRGC 81486-1::[IRIS 313-12047]	IRIS 313-12047	IRGC 132008	ind3	11	C	G	G	G	C	C	A	A	C	A	G	G	T	G	T	C	G	G	A	C	T	G	C	A	G	G	T	G	T	C	C	A	T	T	G	C	C	G	A	T	T	C	T	C	A
MAE HANG::IRGC 81615-2::[IRIS 313-12049]	IRIS 313-12049	IRGC 132352	ind3	11	C	G	G	G	C	C	A	A	C	A	G	G	T	G	T	C	G	G	A	C	T	G	C	A	G	G	T	G	T	C	C	A	T	T	G	C	C	G	A	T	T	C	T	C	A
FACAGRO 406::IRGC 82049-1::[IRIS 313-12053]	IRIS 313-12053	IRGC 127367	indx	11	C	G	G	G	C	C	A	A	C	A	G	G	T	G	T	C	G	G	A	C	T	G	C	A	G	G	T	G	T	C	C	A	T	T	G	C	C		A	T	T	C	T	C	A
LAL MOTI::IRGC 82168-1::[IRIS 313-12055]	IRIS 313-12055	IRGC 127545	aus	11	C	G	G	G	C	C	A	A	C	A	G	G	T	G	T	C	G	G	A	C	T	G	C	A	G	G	T	G	T	C	C	A	T	T	G	C	C	G	A	T	T	C	T	C	A
AI JIAO ZI::IRGC 82255-1::[IRIS 313-12057]	IRIS 313-12057	IRGC 127116	indx	11	C	G	G	G	C	C	A	A	C	A	G	G	T	G	T	C	G	G	A	C	T	G	C	A	G	G	T	G	T	C	C	A	T	T	G	C	C	G	A	T	T	C	T	C	A
MARAMAY::IRGC 82628-1::[IRIS 313-12066]	IRIS 313-12066	IRGC 127609	ind3	11	C	G	G	G	C	C	A	A	C	A	G	G	T	G	T	C	G	G	A	C	T	G	C	A	G	G	T	G	T	C	C	A	T	T	G	C	C	G	A	T	T	C	T	C	A
1146::IRGC 83068-1::[IRIS 313-12081]	IRIS 313-12081	IRGC 128208	ind3	11	C	G	G	G	C	C	A	A	C	A	G	G	T	G	T	C	G	G	A	C	T	G	C	A	G	G	T	G	T	C	C	A	T	T	G	C	C	G	A	T	T	C	T	C	A
MAVOLATSIKA::IRGC 83137-1::[IRIS 313-12082]	IRIS 313-12082	IRGC 127614	ind2	11	C	G	G	G	C	C	A	A	C	A	G	G	T	G	T	C	G	G	A	C	T	G	C	A	G	G	T	G	T	C	C	A	T	T	G	C	C	G	A	T	T	C	T	C	A
NEANG CHEK::IRGC 83894-1::[IRIS 313-12096]	IRIS 313-12096	IRGC 135573	ind3	11	C	G	G	G	C	C	A	A	C	A	G	G	T	G	T	C	G	G	A	C	T	G	C	A	G	G	T	G	T	C	C	A	T	T	G	C	C	G	A	T	T	C	T	C	A
NEANG MINH::IRGC 83897-1::[IRIS 313-12097]	IRIS 313-12097	IRGC 135778	ind3	11	C	G	G	G	C	C	A	A	C	A	G	G	T	G	T	C	G	G	A	C	T	G	C	A	G	G	T	G	T	C	C	A	T	T	G	C	C	G	A	T	T	C	T	C	A
SOK SOV::IRGC 83966-1::[IRIS 313-12102]	IRIS 313-12102	IRGC 132299	ind3	11	C	G	G	G	C	C	A	A	C	A	G	G	T	G	T	C	G	G	A	C	T	G	C	A	G	G	T	G	T	C	C	A	T	T	G	C	C	G	A	T	T	C	T	C	A
ARITH::IRGC 84347-2::[IRIS 313-12109]	IRIS 313-12109	IRGC 127975	ind3	11	C	G	G	G	C	C	A	A	C	A	G	G	T	G	T	C	G	G	A	C	T	G	C	A	G	G	T	G	T	C	C	A	T	T	G	C	C	G	A	T	T	C	T	C	A
INPONG::IRGC 85524-1::[IRIS 313-12127]	IRIS 313-12127	IRGC 127431	ind3	11	C	G	G	G	C	C	A	A	C	A	G	G	T	G	T	C	G	G	A	C	T	G	C	A	G	G	T	G	T	C	C	A	T	T	G	C	C	G	A	T	T	C	T	C	A
HMA GNENG::IRGC 85751-1::[IRIS 313-12128]	IRIS 313-12128	IRGC 127408	ind3	11	C	G	G	G	C	C	A	A	C	A	G	G	T	G	T	C	G	G	A	C	T	G	C	A	G	G	T	G	T	C	C	A	T	T	G	C	C	G	A	T	T	C	T	C	A
MON LAI::IRGC 85857-1::[IRIS 313-12129]	IRIS 313-12129	IRGC 128391	subtrop	11	C	G	G	G	C	C	A	A	C	A	G	G	T	G	T	C	G	G	A	C	T	G	C	A	G	G	T	G	T	C	C	A	T	T	G	C	C	G	A	T	T	C	T	C	A
LG 944::IRGC 86000-1::[IRIS 313-12131]	IRIS 313-12131	IRGC 132011	ind3	11	C	G	G	G	C	C	A	A	C	A	G	G	T	G	T	C	G	G	A	C	T	G	C	A	G	G	T	G	T	C	C	A	T	T	G	C	C	G	A	T	T	C	T	C	A
YADU BARA::IRGC 86912-1::[IRIS 313-12138]	IRIS 313-12138	IRGC 127896	indx	12	C	G	G	G	C	C	A	A	C	A	G	G	T	G	T	C	G	G	A	C	T	G	C	A	G	G	T	G	T	C	C	A	T	T	G	C	C	G	A	T	T	C	T	C	A
HATEA::IRGC 86973-1::[IRIS 313-12141]	IRIS 313-12141	IRGC 132399	aus	11	C	G	G	G	C	C	A	A	C	A	G	G	T	G	T	C	G	G	A	C	T	G	C	A	G	G	T	G	T	C	C	A	T	T		C	C	G	A	T	T	C	T	C	A
SRAU KHGNAERNG::IRGC 87073-1::[IRIS 313-12143]	IRIS 313-12143	IRGC 132300	ind3	11	C	G	G	G	C	C	A	A	C	A	G	G	T	G	T	C	G	G	A	C	T	G	C	A	G	G	T	G	T	C	C	A	T	T	G	C	C	G	A	T	T	C	T	C	A
ARN'-SAR THNGORN'::IRGC 87205-1::[IRIS 313-12148]	IRIS 313-12148	IRGC 127172	ind3	11	C	G	G	G	C	C	A	A	C	A	G	G	T	G	T	C	G	G	A	C	T	G	C	A	G	G	T	G	T	C	C	A	T	T	G	C	C	G	A	T	T	C	T	C	A
DAMNOEUB KRACHAK SESS::IRGC 87380-1::[IRIS 313-12151]	IRIS 313-12151	IRGC 132279	ind3	11	C	G	G	G	C	C	A	A	C	A	G	G	T	G	T	C	G	G	A	C	T	G	C	A	G	G	T	G	T	C	C	A	T	T	G	C	C	G	A	T	T	C	T	C	A
PA PHA EA::IRGC 87751-1::[IRIS 313-12161]	IRIS 313-12161	IRGC 127717	ind3	11	C	G	G	G	C	C	A	A	C	A	G	G	T	G	T	C	G	G	A	C	T	G	C	A	G	G	T	G	T	C	C	A	T	T	G	C	C	G	A	T	T	C	T	C	A
NYAULI::IRGC 88628-1::[IRIS 313-12182]	IRIS 313-12182	IRGC 127686	indx	12	C	G	G	G	C	C	A	A	C	A	G	G	T	G	T	C	G	G	A	C	T	G	C	A	G	G	T	G	T	C	C	A	T	T	G	C	C	G	A	T	T	C	T	C	A
CHAM LEK::IRGC 89387-1::[IRIS 313-12187]	IRIS 313-12187	IRGC 127255	indx	11	C	G	G	G	C	C	A	A	C	A	G	G	T	G	T	C	G	G	A	C	T	G	C	A	G	G	T	G	T	C	C	A	T	T	G	C	C	G	A	T	T	C	T	C	A
SALA::IRGC 90457-1::[IRIS 313-12207]	IRIS 313-12207	IRGC 128456	indx	11	C	G	G	G	C	C	A	A	C	A	G	G	T	G	T	C	G	G	A	C	T	G	C	A	G	G	T	G	T	C	C	A	T	T	G	C	C	G	A	T	T	C	T	C	A
CHAO KHIE KHOUAY::IRGC 90968-1::[IRIS 313-12220]	IRIS 313-12220	IRGC 131976	indx	11	C	G	G	G	C	C	A	A	C	A	G	G	T	G	T	C	G	G	A	C	T	G	C	A	G	G	T	G	T	C	C	A	T	T	G	C	C	G	A	T	T	C	T	C	A
SOM::IRGC 92221-1::[IRIS 313-12228]	IRIS 313-12228	IRGC 128474	subtrop	11	C	G	G	G	C	C	A	A	C	A	G	G	T	G	T	C	G	G	A	C	T	G	C	A	G	G	T	G	T	C	C	A	T	T	G	C	C	G	A	T	T	C	T	C	A
TE SAN AI 2::IRGC 93355-1::[IRIS 313-12232]	IRIS 313-12232	IRGC 127852	indx	11	C	G	G	G	C	C	A	A	C	A	G	G	T	G	T	C	G	G	A	C	T	G	C	A	G	G	T	G	T	C	C	A	T	T	G	C	C	G	A	T	T	C	T	C	A
LAOZAOGU::IRGC 93444-1::[IRIS 313-12236]	IRIS 313-12236	IRGC 127552	ind1A	11	C	G	G	G	C	C	A	A	C	A	G	G	T	G	T	C	G	G	A	C	T	G	C	A	G	G	T	G	T	C	C	A	T	T	G	C	C	G	A	T	T	C	T	C	A
WUGU::IRGC 93479-1::[IRIS 313-12237]	IRIS 313-12237	IRGC 127893	ind1A	11	C	G	G	G	C	C	A	A	C	A	G	G	T	G	T	C	G	G	A	C	T	G	C	A	G	G	T	G	T	C	C	A	T	T	G	C	C	G	A	T	T	C	T	C	A
PULUT MINYAK::IRGC 93615-1::[IRIS 313-12240]	IRIS 313-12240	IRGC 132294	ind3	11	C	G	G	G	C	C	A	A	C	A	G	G	T	G	T	C	G	G	A	C	T	G	C	A	G	G	T	G	T	C	C	A	T	T	G	C	C	G	A	T	T	C	T	C	A
RUS RUSSEI::IRGC 94341-1::[IRIS 313-12251]	IRIS 313-12251	IRGC 127772	ind3	11	C	G	G	G	C	C	A	A	C	A	G	G	T	G	T	C	G	G	A	C	T	G	C	A	G	G	T	G	T	C	C	A	T	T	G	C	C	G	A	T	T	C	T	C	A
DON::IRGC 95117-1::[IRIS 313-12258]	IRIS 313-12258	IRGC 128283	subtrop	11	C	G	G	G	C	C	A	A	C	A	G	G	T	G	T	C	G	G	A	C	T	G	C	A	G	G	T	G	T	C	C	A	T	T	G	C	C	G	A	T	T	C	T	C	A
EA NOUAN::IRGC 95147-1::[IRIS 313-12259]	IRIS 313-12259	IRGC 127352	ind3	11	C	G	G	G	C	C	A	A	C	A	G	G	T	G	T	C	G	G	A	C	T	G	C	A	G	G	T	G	T	C	C	A	T	T	G	C	C	G	A	T	T	C	T	C	A
KHIE TOM::IRGC 95601-1::[IRIS 313-12263]	IRIS 313-12263	IRGC 127521	ind3	11	C	G	G	G	C	C	A	A	C	A	G	G	T	G	T	C	G	G	A	C	T	G	C	A	G	G	T	G	T	C	C	A	T	T	G	C	C	G	A	T	T	C	T	C	A
AIJIAONANTE::IRGC 96974-1::[IRIS 313-12273]	IRIS 313-12273	IRGC 127115	ind1A	12		G	G	G	C	C	A	A	C	A	G	G	T	G	T	C	G	G	A	C	T	G	C	A	G	G	T	G	T	C	C	A	T	T	G	C	C	G	A	T	T	C	T	C	A
MAGU::IRGC 97027-1::[IRIS 313-12275]	IRIS 313-12275	IRGC 127590	indx	11	C	G	G	G	C	C	A	A	C	A	G	G	T	G	T	C	G	G	A	C	T	G	C	A	G	G	T	G	T	C	C	A	T	T	G	C	C	G	A	T	T	C	T	C	A
EKAYIN SAW::IRGC 97468-2::[IRIS 313-12286]	IRIS 313-12286	IRGC 128038	ind3	11	C	G	G	G	C	C	A	A	C	A	G	G	T	G	T	C	G	G	A	C	T	G	C	A	G	G	T	G	T	C	C	A	T	T	G	C	C	G	A	T	T	C	T	C	A
KAUK HNYINGWA::IRGC 97487-1::[IRIS 313-12287]	IRIS 313-12287	IRGC 127501	ind3	11	C	G	G	G	C	C	A	A	C	A	G	G	T	G	T	C	G	G	A	C	T	G	C	A	G	G	T	G	T	C	C	A	T	T	G	C	C	G	A	T	T	C	T	C	A
YARSABA::IRGC 97567-1::[IRIS 313-12289]	IRIS 313-12289	IRGC 132304	subtrop	11	C	G	G	G	C	C	A	A	C	A	G	G	T	G	T	C	G	G	A	C	T	G	C	A	G	G	T	G	T	C	C	A	T	T	G	C	C	G	A	T	T	C	T	C	A
SABALINE::IRGC 98059-1::[IRIS 313-12296]	IRIS 313-12296	IRGC 127773	ind3	11	C	G	G	G	C	C	A	A	C	A	G	G	T	G	T	C	G	G	A	C	T	G	C	A	G	G	T	G	T	C	C	A	T	T	G	C	C	G	A	T	T	C	T	C	A
MUANG TAY::IRGC 98382-1::[IRIS 313-12299]	IRIS 313-12299	IRGC 136100	subtrop	11	C	G	G	G	C	C	A	A	C	A	G	G	T	G	T	C	G	G	A	C	T	G	C	A	G	G	T	G	T	C	C	A	T	T	G	C	C	G	A	T	T	C	T	C	A
NGAM KON DAM::IRGC 98486-1::[IRIS 313-12300]	IRIS 313-12300	IRGC 127673	indx	11	C	G	G	G	C	C	A	A	C	A	G	G	T	G	T	C	G	G	A	C	T	G	C	A	G	G	T	G	T	C	C	A	T	T	G	C	C	G	A	T	T	C	T	C	A
LG 9274::IRGC 98715-1::[IRIS 313-12303]	IRIS 313-12303	IRGC 127561	indx	11	C	G	G	G	C	C	A	A	C	A	G	G	T	G	T	C	G	G	A	C	T	G	C	A	G	G	T	G	T	C	C	A	T	T	G	C	C	G	A	T	T	C	T	C	A
DOK HIEN NOI::IRGC 107021-1::[IRIS 313-12337]	IRIS 313-12337	IRGC 127335	subtrop	11	C	G	G	G	C	C	A	A	C	A	G	G	T	G	T	C	G	G	A	C	T	G	C	A	G	G	T	G	T	C	C	A	T	T	G	C	C	G	A	T	T	C	T	C	A
VIENG::IRGC 107375-2::[IRIS 313-12345]	IRIS 313-12345	IRGC 128201	subtrop	11	C	G	G	G	C	C	A	A	C	A	G	G	T	G	T	C	G	G	A	C	T	G	C	A	G	G	T	G	T	C	C	A	T	T	G	C	C	G	A	T	T	C	T	C	A
MEE::IRGC 107773-1::[IRIS 313-12352]	IRIS 313-12352	IRGC 127621	subtrop	11	C	G	G	G	C	C	A	A	C	A	G	G		G	T	C	G	G	A	C	T	G	C	A	G	G	T	G	T	C	C	A	T	T	G	C	C	G	A	T	T	C	T	C	A
NASAENG::IRGC 107819-1::[IRIS 313-12355]	IRIS 313-12355	IRGC 127650	indx	11	C	G	G	G	C	C	A	A	C	A	G	G	T	G	T	C	G	G	A	C	T	G	C	A	G	G	T	G	T	C	C	A	T	T	G	C	C	G	A	T	T	C	T	C	A
IRRI 146::G1::[IRIS 313-15902]	IRIS 313-15902	IRGC 126966	ind1B	11	C	G	G	G	C	C	A	A	C	A	G	G	T	G	T	C	G	G	A	C	T	G	C	A	G	G	T	G	T	C	C	A	T	T	G	C	C	G	A	T	T	C	T	C	A
ADNY 11::C1::[IRIS 313-7636]	IRIS 313-7636	IRGC 126992	ind1B	11	C	G	G	G	C	C	A	A	C	A	G	G	T	G	T	C	G	G	A	C	T	G	C	A	G	G	T	G	T	C	C	A	T	T	G	C	C	G	A	T	T	C	T	C	A
BOTOHAVANA 139::GERVEX 8237-C1::[IRIS 313-7650]	IRIS 313-7650	IRGC 124380	ind2	11	C	G	G	G	C	C	A	A	C	A	G	G	T	G	T	C	G	G	A	C	T	G	C	A	G	G	T	G	T	C	C	A	T	T	G	C	C	G	A	T	T	C	T	C	A
BOTRA MAITSO::GERVEX 8389-C1::[IRIS 313-7651]	IRIS 313-7651	IRGC 121990	ind2	11	C	G	G	G	C	C	A	A	C	A	G	G	T	G	T	C	G	G	A	C	T	G	C	A	G	G	T	G	T	C	C	A	T	T	G	C	C	G	A	T	T	C	T	C	A
CICA 8::C1::[IRIS 313-7664]	IRIS 313-7664	IRGC 122011	ind1B	11	C	G	G	G	C	C	A	A	C	A	G	G	T	G	T	C	G	G	A	C	T	G	C	A	G	G	T	G	T	C		A	T	T	G	C	C	G	A	T	T	C	T	C	A
DANAU LAUT TAWAR::C1::[IRIS 313-7668]	IRIS 313-7668	IRGC 122029	indx	11	C	G	G	G	C	C	A	A	C	A	G	G	T	G	T	C	G	G	A	C	T	G	C	A	G	G	T	G	T	C	C	A	T	T	G	C	C	G	A	T	T	C	T	C	A
H 15-23-DA::C1::[IRIS 313-7681]	IRIS 313-7681	IRGC 122076	indx	11	C	G	G	G	C	C	A	A	C	A	G	G	T	G	T	C	G	G	A	C	T	G	C	A	G	G	T	G	T	C	C	A	T	T	G	C	C	G	A	T	T	C	T	C	A
IR 2344-P1 PB-9-3-2B::IRGC 39317-C1::[IRIS 313-7690]	IRIS 313-7690	IRGC 122093	indx	11	C	G	G	G	C	C	A	A	C	A	G	G	T	G	T	C	G	G	A	C	T	G	C	A	G	G	T	G	T	C	C	A	T	T	G	C	C	G	A	T	T	C	T	C	A
IR 28::IRGC 30411-C1::[IRIS 313-7691]	IRIS 313-7691	IRGC 122094	ind1B	11	C	G	G	G	C	C	A	A	C	A	G	G		G	T	C	G	G	A	C	T	G	C	A	G	G	T	G	T	C	C	A	T	T	G	C	C	G	A	T	T	C	T	C	A
ROJOKELY::GERVEX 8410-C1::[IRIS 313-7758]	IRIS 313-7758	IRGC 122220	ind2	11	C	G	G	G	C	C	A	A	C	A	G	G	T	G	T	C	G	G	A	C	T	G	C	A	G	G	T	G	T	C	C	A	T	T	G	C	C	G	A	T	T	C	T	C	A
SALUMPIKIT::IRTP 4777-C1::[IRIS 313-7769]	IRIS 313-7769	IRGC 122236	indx	11	C	G	G	G	C	C	A	A	C	A	G	G	T	G	T	C	G	G	A	C	T	G	C	A	G	G	T	G	T	C	C	A	T	T	G	C	C	G	A	T	T	C	T	C	A
SAMBALA MALO::C1::[IRIS 313-7770]	IRIS 313-7770	IRGC 122239	ind1B	11	C	G	G	G	C	C	A	A	C	A	G	G	T	G	T	C	G	G	A	C	T	G	C	A	G	G	T	G	T	C	C	A	T	T	G	C	C	G	A	T	T	C	T	C	A
SOM CAU 70 A::IRGC 8227-C1::[IRIS 313-7778]	IRIS 313-7778	IRGC 122254	indx	11	C	G	G	G	C	C	A	A	C	A	G	G	T	G	T	C	G	G	A	C	T	G	C	A	G	G	T	G	T	C	C	A	T	T	G	C	C	G	A	T	T	C	T	C	A
SONA::IRGC 26971-C1::[IRIS 313-7780]	IRIS 313-7780	IRGC 122255	indx	11	C	G	G	G	C	C	A	A	C	A	G	G	T	G	T	C	G	G	A	C	T	G	C	A	G	G	T	G	T	C	C	A	T	T	G	C	C	G	A	T	T	C	T	C	A
WAS 198-B-3-1-3::C1::[IRIS 313-7815]	IRIS 313-7815	IRGC 122287	ind1B	11	C	G	G	G	C	C	A	A	C	A	G	G	T	G	T	C	G	G	A	C	T	G	C	A	G	G	T	G	T	C	C	A	T	T	G	C	C	G	A	T	T	C	T	C	A
WAS 21-B-B-20-4-3-3::C1::[IRIS 313-7824]	IRIS 313-7824	IRGC 122291	ind1B	11	C	G	G	G	C	C	A	A	C	A	G	G	T	G	T	C	G	G	A	C	T	G	C	A	G	G	T	G	T	C	C	A	T	T	G	C	C	G	A	T	T	C	T	C	A
WAS 33-B-B-15-1-4-5::C1::[IRIS 313-7826]	IRIS 313-7826	IRGC 122292	ind1B	11	C	G	G	G	C	C	A	A	C	A	G	G	T	G	T	C	G	G	A	C	T	G	C	A	G	G	T	G	T	C	C	A	T	T	G	C	C	G	A	T	T	C	T	C	A
CNA 7\BO\1\1>33-13-6-1::C1::[IRIS 313-7866]	IRIS 313-7866	IRGC 122018	trop	11	C	G	G	G	C	C	A	A	C	A	G	G	T	G	T	C	G	G	A	C	T	G	C	A	G	G	T	G	T	C	C	A	T	T	G	C	C	G	A	T	T	C	T	C	A
CUIABANA::IRTP 17401-C1::[IRIS 313-7870]	IRIS 313-7870	IRGC 122027	japx	11	C	G	G	G	C	C	A	A	C	A	G	G	T	G	T	C	G	G	A	C	T	G	C	A	G	G	T	G	T	C	C	A	T	T	G	C	C	G	A	T	T	C	T	C	A
IR 72967-12-2-3::C1::[IRIS 313-7911]	IRIS 313-7911	IRGC 122111	ind1B	11	C	G	G	G	C	C	A	A	C	A	G	G	T	G	T	C	G	G	A	C	T	G	C	A	G	G	T	G	T	C	C	A	T	T	G	C	C	G	A	T	T	C	T	C	A
VARY LAVA DE BETAFO::GERVEX 8381-C1::[IRIS 313-7993]	IRIS 313-7993	IRGC 122276	trop	11	C	G	G	G	C	C	A	A	C	A	G	G	T	G	T	C	G	G	A	C	T	G	C	A	G	G	T	G	T	C	C	A	T	T	G	C	C	G	A	T	T	C	T	C	A
RIZZOTTO 51/1::GERVEX 50-C1::[IRIS 313-8023]	IRIS 313-8023	IRGC 122218	japx	11	C	G	G	G	C	C	A	A	C	A	G	G	T	G	T	C	G	G	A	C	T	G	C	A	G	G	T	G	T	C	C	A	T	T	G	C	C	G	A	T	T	C	T	C	A
GIOVANNI MARCHETTI::GERVEX 62-C1::[IRIS 313-8026]	IRIS 313-8026	IRGC 122056	temp	11	C	G	G	G	C	C	A	A	C	A	G	G	T	G	T	C	G	G	A	C	T	G	C	A	G	G	T	G	T	C	C	A	T	T	G	C	C	G	A	T	T	C	T	C	A
LORD::GERVEX 127-C1::[IRIS 313-8049]	IRIS 313-8049	IRGC 122150	japx	11	C	G	G	G	C	C	A	A	C	A	G	G	T	G	T	C	G	G	A	C	T	G	C	A	G	G	T	G	T	C	C	A	T	T	G	C	C	G	A	T	T	C	T	C	A
RUBIDIO::GERVEX 146-C1::[IRIS 313-8053]	IRIS 313-8053	IRGC 122228	japx	11	C	G	G	G	C	C	A	A	C	A	G	G	T	G	T	C	G	G	A	C	T	G	C	A	G	G	T	G	T	C	C	A	T	T	G	C	C	G	A	T	T	C	T	C	A
79 UPLA::GERVEX 154-C1::[IRIS 313-8057]	IRIS 313-8057	IRGC 121956	trop	11	C	G	G	G	C	C	A	A	C	A	G	G	T	G	T	C	G	G	A	C	T	G	C	A	G	G	T	G	T	C	C	A	T	T	G	C	C	G	A	T	T	C	T	C	A
DAWN CI 9534::GERVEX 481-C1::[IRIS 313-8073]	IRIS 313-8073	IRGC 122033	aus	11	C	G	G	G	C	C	A	A	C	A	G	G	T	G	T	C	G	G	A	C	T	G	C	A	G	G	T	G	T	C	C	A	T	T	G	C	C	G	A	T	T	C	T	C	A
HARRA::GERVEX 501-C1::[IRIS 313-8075]	IRIS 313-8075	IRGC 122078	temp	11.5	C	G	G	G	C	C	A	A	C	A	G	G	T	G	T	C	G	G	A	C	T	G	C	A	G	G	T	G	T	C	C	A	T	T	G	C	C	G	A	T	T	C	T	C	A
ESCARLATE::GERVEX 887-C1::[IRIS 313-8113]	IRIS 313-8113	IRGC 122043	temp	11	C	G	G	G	C	C	A	A	C	A	G	G	T	G	T	C	G	G	A	C	T	G	C	A	G	G	T	G	T	C	C	A	T	T	G	C	C	G	A	T	T	C	T	C	A
JUBILIENI::GERVEX 992-C1::[IRIS 313-8119]	IRIS 313-8119	IRGC 122126	temp	11	C	G	G	G	C	C	A	A	C	A	G	G	T	G	T	C	G	G	A	C	T	G	C	A	G	G	T	G	T	C	C	A	T	T	G	C	C	G	A	T	T	C	T	C	A
SELN 244 A 6-20::GERVEX 1273-C1::[IRIS 313-8141]	IRIS 313-8141	IRGC 122244	temp	11	C	G	G	G	C	C	A	A	C	A	G	G	T	G	T	C	G	G	A	C	T	G	C	A	G	G	T	G	T	C	C	A	T	T	G	C	C	G	A	T	T	C	T	C	A
T 757::GERVEX 1316-C1::[IRIS 313-8147]	IRIS 313-8147	IRGC 122259	temp	11	C	G	G	G	C	C	A	A	C	A	G	G	T	G	T	C	G	G	A	C	T	G	C	A	G	G	T	G	T	C	C	A	T	T	G	C	C	G	A	T	T	C	T	C	A
TIMICH 108::GERVEX 1325-C1::[IRIS 313-8148]	IRIS 313-8148	IRGC 122267	temp	11	C	G	G	G	C	C	A	A	C	A	G	G	T	G	T	C	G	G	A	C	T	G	C	A	G	G	T	G	T	C	C	A	T	T	G	C	C	G	A	T	T	C	T	C	A
GIGANTE VERCELLI::GERVEX 1408-C1::[IRIS 313-8154]	IRIS 313-8154	IRGC 122055	japx	11	C	G	G	G	C	C	A	A	C	A	G	G	T	G	T	C	G	G	A	C	T	G	C	A	G	G	T	G	T	C	C	A	T	T	G	C	C	G	A	T	T	C	T	C	A
CNA 4081::GERVEX 1494-C1::[IRIS 313-8161]	IRIS 313-8161	IRGC 122017	ind1B	11	C	G	G	G	C	C	A	A	C	A	G	G	T	G	T	C	G	G	A	C	T	G	C	A	G	G	T	G	T	C	C	A	T	T	G	C	C	G	A	T	T	C	T	C	A
RPC 12::GERVEX 1505-C1::[IRIS 313-8162]	IRIS 313-8162	IRGC 122223	temp	11	C	G	G	G	C	C	A	A	C	A	G	G	T	G	T	C	G	G	A	C	T	G	C	A	G	G	T	G	T	C	C	A	T	T	G	C	C	G	A	T	T	C	T	C	A
YRM 6-2::GERVEX 1508-C1::[IRIS 313-8164]	IRIS 313-8164	IRGC 122300	temp	11	C	G	G	G	C	C	A	A	C	A	G	G	T	G	T	C	G	G	A	C	T	G	C	A	G	G	T	G	T	C	C	A	T	T	G	C	C	G	A	T	T	C	T	C	A
AUZGUSTA::GERVEX 1634-C1::[IRIS 313-8171]	IRIS 313-8171	IRGC 121972	temp	11	C	G	G	G	C	C	A	A	C	A	G	G	T	G	T	C	G	G	A	C	T	G	C	A	G	G	T	G	T	C	C	A	T	T	G	C	C	G	A	T	T	C	T	C	A
FRAGANCE::GERVEX 1651-C1::[IRIS 313-8184]	IRIS 313-8184	IRGC 122050	admix	11	C	G	G	G	C	C	A	A	C	A	G	G	T	G	T	C	G	G	A	C	T	G	C	A	G	G	T	G	T	C	C	A	T	T	G	C	C	G	A	T	T	C	T	C	A
MERLE::GERVEX 1685-C1::[IRIS 313-8215]	IRIS 313-8215	IRGC 122168	indx	11	C	G	G	G	C	C	A	A	C	A	G	G	T	G	T	C	G	G	A	C	T	G	C	A	G	G	T	G	T	C	C	A	T	T	G	C	C	G	A	T	T	C	T	C	A
SAKHA 102::GERVEX 1687-C1::[IRIS 313-8217]	IRIS 313-8217	IRGC 122233	temp	11	C	G	G	G	C	C	A	A	C	A	G	G	T	G	T	C	G	G	A	C	T	G	C	A	G	G	T	G	T	C	C	A	T	T	G	C	C	G	A	T	T	C	T	C	A
CO 39::[IRIS 313-8265]	IRIS 313-8265	IRGC 117454	indx	12	C	G	G	G	C	C	A	A	C		G	G	T	G	T	C	G	G	A	C	T	G	C	A	G	G	T	G	T	C	C	A	T	T	G	C	C	G	A	T	T	C	T	C	A
AVO::[IRIS 313-8288]	IRIS 313-8288	IRGC 117430	indx	11	C	G	G	G	C	C	A	A	C	A	G	G	T	G	T	C	G	G	A	C	T	G	C	A	G	G	T	G	T	C	C	A	T	T	G	C	C	G	A	T	T	C	T	C	A
SAGNADE::IRGC 15801-1::[IRIS 313-8293]	IRIS 313-8293	IRGC 132432	ind3	11	C	G	G	G	C	C	A	A	C	A	G	G	T	G	T	C	G	G	A	C	T	G	C	A	G	G	T	G	T	C	C	A	T	T	G	C	C	G	A	T	T	C	T	C	A
PULUTHI KARAN (MIXED)::IRGC 77530-1::[IRIS 313-8306]	IRIS 313-8306		indx	11	C	G	G	G	C	C	A	A	C	A	G	G	T	G	T	C	G	G	A	C	T	G	C	A	G	G	T	G	T	C	C	A	T	T	G	C	C	G	A	T	T	C	T	C	A
BAT DO::IRGC 7014-1::[IRIS 313-8341]	IRIS 313-8341	IRGC 121599	indx	11	C	G	G	G	C	C	A	A	C	A	G	G	T	G	T	C	G	G	A	C	T	G	C	A	G	G	T	G	T	C	C	A	T	T	G	C	C	G	A	T	T	C	T	C	A
MENTIK TJERE BELUT::IRGC 18254-1::[IRIS 313-8368]	IRIS 313-8368	IRGC 126071	indx	11	C	G	G	G	C	C	A	A	C	A	G	G	T	G	T	C	G	G	A	C	T	G	C	A	G	G	T	G	T	C	C	A	T	T	G	C	C	G	A	T	T	C	T	C	A
MARAGBE::IRGC 69263-1::[IRIS 313-8391]	IRIS 313-8391		ind2	11	C	G	G	G	C	C	A	A	C	A	G	G	T	G	T	C	G	G	A	C	T	G	C	A	G	G	T	G	T	C	C	A	T	T	G	C	C	G	A	T	T	C	T	C	A
JIN JUN DAO::IRGC 59710-1::[IRIS 313-8405]	IRIS 313-8405	IRGC 125613	indx	11	C	G	G	G	C	C	A	A	C	A	G	G	T	G	T	C	G	G	A	C	T	G	C	A	G	G	T	G	T	C	C	A	T	T	G	C	C	G	A	T	T	C	T	C	A
SOM NGHE AN::IRGC 60751-1::[IRIS 313-8409]	IRIS 313-8409	IRGC 126007	indx	11	C	G	G	G	C	C	A	A	C	A	G	G	T	G	T	C	G	G	A	C	T	G	C	A	G	G	T	G	T	C	C	A	T	T	G	C	C	G	A	T	T	C	T	C	A
UPRH 233::IRGC 61667-1::[IRIS 313-8435]	IRIS 313-8435	IRGC 125627	ind1A	11	C	G	G	G	C	C	A	A	C	A	G	G	T	G	T	C	G	G	A	C	T	G	C	A	G	G	T	G	T	C	C	A	T	T	G	C	C	G	A	T	T	C	T	C	A
ARC 18175::IRGC 42316-1::[IRIS 313-8458]	IRIS 313-8458	IRGC 131928	indx	11	C	G	G	G	C	C	A	A	C	A	G	G	T	G	T	C	G	G	A	C	T	G	C	A	G	G	T	G	T	C	C	A	T	T	G	C	C	G	A	T	T	C	T	C	A
KUNENG::IRGC 71545-1::[IRIS 313-8492]	IRIS 313-8492	IRGC 126226	ind3	11	C	G	G	G	C	C	A	A	C	A	G	G	T	G	T	C	G	G	A	C	T	G	C	A	G	G	T	G	T	C	C	A	T	T	G	C	C	G	A	T	T	C	T	C	A
NG KARAN DE::IRGC 43489-1::[IRIS 313-8536]	IRIS 313-8536	IRGC 135539	ind3	11	C	G	G	G	C	C	A	A	C	A	G	G	T	G	T	C	G	G	A	C	T	G	C	A	G	G	T	G	T	C	C	A	T	T	G	C	C	G	A	T	T	C	T	C	A
SINERBESA::IRGC 38711-1::[IRIS 313-8567]	IRIS 313-8567		ind3	11	C	G	G	G	C	C	A	A	C	A	G	G	T	G	T	C	G	G	A	C	T	G	C	A	G	G	T	G	T	C	C	A	T	T	G	C	C	G	A	T	T	C	T	C	A
LARHA MUGAD::IRGC 52339-1::[IRIS 313-8568]	IRIS 313-8568	IRGC 125619	ind2	11	C	G	G	G	C	C	A	A	C	A	G	G	T	G	T	C	G	G	A	C	T	G	C	A	G	G	T	G	T	C	C	A	T	T	G	C	C	G	A	T	T	C	T	C	A
SIAM ER 32::IRGC 13917-1::[IRIS 313-8591]	IRIS 313-8591	IRGC 135543	ind3	11	C	G	G	G	C	C	A	A	C	A	G	G	T	G	T	C	G	G	A	C	T	G	C	A	G	G	T	G	T	C	C	A	T	T	G	C	C	G	A	T	T	C	T	C	A
AC 13 (T 141)::IRGC 5456-1::[IRIS 313-8606]	IRIS 313-8606	IRGC 131926	ind3	10.5	C	G	G	G	C	C	A	A	C	A	G	G	T	G	T	C	G	G	A	C	T	G	C	A	G	G	T	G	T	C	C	A	T	T	G	C	C	G	A	T	T	C	T	C	A
ARC 11663::IRGC 42695-1::[IRIS 313-8621]	IRIS 313-8621	IRGC 126174	ind1B	11	C	G	G	G	C		A	A	C	A	G	G	T	G	T	C	G	G	A	C	T	G	C	A	G	G	T	G	T	C	C	A	T	T	G	C	C	G	A	T	T	C	T	C	A
PRELUDE::IRGC 1790-1::[IRIS 313-8627]	IRIS 313-8627	IRGC 126260	trop	11	C	G	G	G	C	C	A	A	C	A	G	G	T	G	T	C	G	G	A	C	T	G	C	A	G	G	T	G	T	C	C	A	T	T	G	C	C	G	A	T	T	C	T	C	A
DAJA::IRGC 17440-1::[IRIS 313-8643]	IRIS 313-8643	IRGC 131935	ind3	11	C	G	G	G	C	C	A	A	C	A	G	G	T	G	T	C	G	G	A	C	T	G	C	A	G	G	T	G	T	C	C	A	T	T	G	C	C	G	A	T	T	C	T	C	A
PAI YI PING::IRGC 1368-1::[IRIS 313-8645]	IRIS 313-8645	IRGC 126122	ind1A	11	C	G	G	G	C	C	A	A	C	A	G	G	T	G	T	C	G	G	A	C	T	G	C	A	G	G	T	G	T	C	C	A	T	T	G	C	C	G	A	T	T	C	T	C	A
CO 19::IRGC 5905-1::[IRIS 313-8657]	IRIS 313-8657	IRGC 135525	indx	11	C	G	G	G	C	C	A	A	C	A	G	G	T	G	T	C	G	G	A	C	T	G	C	A	G	G	T	G	T	C	C	A	T	T	G	C	C	G	A	T	T	C	T	C	A
BALASURIYA A::IRGC 66509-1::[IRIS 313-8699]	IRIS 313-8699	IRGC 126178	indx	11	C	G	G	G	C	C	A	A	C	A	G	G	T	G	T	C	G	G	A	C	T	G	C	A	G	G	T	G	T	C	C	A	T	T	G	C	C	G	A	T	T	C	T	C	A
DA 7::[IRIS 313-8703]	IRIS 313-8703	IRGC 124432	ind2	11	C	G	G	G	C	C	A	A	C	A	G	G	T	G	T	C	G	G	A	C	T	G	C	A	G	G	T	G	T	C	C	A	T	T	G	C	C	G	A	T	T	C	T	C	A
PULUT BARAYA::IRGC 27393-1::[IRIS 313-8725]	IRIS 313-8725	IRGC 126262	ind3	11	C	G	G	G	C	C	A	A	C	A	G	G	T	G	T	C	G	G	A	C	T	G	C	A	G	G	T	G	T	C	C	A	T	T	G	C	C	G	A	T	T	C	T	C	A
TAI 6::IRGC 69058-1::[IRIS 313-8739]	IRIS 313-8739	IRGC 126090	admix	11	C	G	G	G	C	C	A	A	C	A	G	G	T	G	T	C	G	G	A	C	T	G	C	A	G	G	T	G	T	C	C	A	T	T	G	C	C	G	A	T	T	C	T	C	A
NIAO YAO::IRGC 5496-1::[IRIS 313-8743]	IRIS 313-8743	IRGC 126075	indx	11	C	G	G	G	C	C	A	A	C	A	G	G	T	G	T	C	G	G	A	C	T	G	C	A	G	G	T	G	T	C	C	A	T	T	G	C	C	G	A	T	T	C	T	C	A
571::IRGC 48493-1::[IRIS 313-8872]	IRIS 313-8872	IRGC 125630	japx	11	C	G	G	G	C	C	A	A	C	A	G	G	T	G	T	C	G	G	A	C	T	G	C	A	G	G	T	G	T	C	C	A	T	T	G	C	C	G	A	T	T	C	T	C	A
KUTTA::IRGC 52184-1::[IRIS 313-8924]	IRIS 313-8924	IRGC 125815	ind2	11	C	G	G	G	C	C	A	A	C	A	G	G	T	G	T	C	G	G	A	C	T	G	C	A	G	G	T	G	T	C	C	A	T	T	G	C	C	G	A	T	T	C	T	C	A
MUKKALA BAZAL::IRGC 77279-1::[IRIS 313-8930]	IRIS 313-8930	IRGC 125844	ind1B	11	C	G	G	G	C	C	A	A	C	A	G	G	T	G	T	C	G	G	A	C	T	G	C	A	G	G	T	G	T	C	C	A	T	T	G	C	C	G	A	T	T	C	T	C	A
FU ZAO XIAN::IRGC 63619-1::[IRIS 313-8940]	IRIS 313-8940	IRGC 125744	ind1A	12	C	G	G	G	C	C	A	A	C	A	G	G	T	G	T	C	G	G	A	C	T	G	C	A	G	G	T	G	T	C	C	A	T	T	G	C	C	G	A	T	T	C	T	C	A
BUCAYAB::IRGC 44357-1::[IRIS 313-8948]	IRIS 313-8948	IRGC 126974	ind3	11	C	G	G	G	C	C	A	A	C	A	G	G	T	G	T	C	G	G	A	C	T	G	C	A	G	G	T	G	T	C	C	A	T	T	G	C	C	G	A	T	T	C	T	C	A
BAM 9::IRGC 6179-1::[IRIS 313-8957]	IRIS 313-8957	IRGC 125670	ind2	11	C	G	G	G	C	C	A	A	C	A	G	G	T	G	T	C	G	G	A	C	T	G	C	A	G	G	T	G	T	C	C	A	T	T	G	C	C	G	A	T	T	C	T	C	A
ARC 12576::IRGC 22163-1::[IRIS 313-8967]	IRIS 313-8967	IRGC 125645	indx	11	C	G	G	G	C	C	A	A	C	A	G	G	T	G	T	C	G	G	A	C	T	G	C	A	G	G	T	G	T	C	C	A	T	T	G	C	C	G	A	T	T	C	T	C	A
KHAO' HAWM::IRGC 78257-1::[IRIS 313-8985]	IRIS 313-8985	IRGC 126153	ind3	11	C	G	G	G	C	C	A	A	C	A	G	G	T	G	T	C	G	G	A	C	T	G	C	A	G	G	T	G	T	C	C	A	T	T	G	C	C	G	A	T	T	C	T	C	A
ARC 10754::IRGC 12603-1::[IRIS 313-8986]	IRIS 313-8986	IRGC 125637	indx	11	C	G	G	G	C	C	A	A	C	A	G	G	T	G	T	C	G	G	A	C	T	G	C	A	G	G	T	G	T	C	C	A	T	T	G	C	C	G	A	T	T	C	T	C	A
KOTOBUKI MOCHI::[IRIS 313-9002]	IRIS 313-9002	IRGC 117518	temp	11	C	G	G	G	C	C	A	A	C	A	G	G	T	G	T	C	G	G	A	C	T	G	C	A	G	G	T	G	T	C	C	A	T	T	G	C	C	G	A	T	T	C	T	C	A
LONG KHI KRAI::IRGC 64490-1::[IRIS 313-9006]	IRIS 313-9006	IRGC 126985	ind3	11	C	G	G	G	C	C	A	A	C	A	G	G	T	G	T	C	G	G	A	C	T	G	C	A	G	G	T	G	T	C	C	A	T	T	G	C	C	G	A	T	T	C	T	C	A
CR 60-10::IRGC 15777-1::[IRIS 313-9023]	IRIS 313-9023	IRGC 125715	indx	11	C	G	G	G	C	C	A	A	C	A	G	G	T	G	T	C	G	G	A	C	T	G	C	A	G	G	T	G	T	C	C	A	T	T	G	C	C	G	A	T	T	C	T	C	A
KHAO GRADOOK CHAHNG::IRGC 17111-1::[IRIS 313-9032]	IRIS 313-9032	IRGC 125800	ind1B	11	C	G	G	G	C	C	A	A	C	A	G	G	T	G	T	C	G	G	A	C	T	G	C	A	G	G	T	G	T	C	C	A	T	T	G	C	C	G	A	T	T	C	T	C	A
AUS 177::IRGC 29009-1::[IRIS 313-9066]	IRIS 313-9066	IRGC 125659	ind1B	11	C	G	G	G	C	C	A	A	C	A	G	G	T	G	T	C	G	G	A	C	T	G	C	A	G	G	T	G	T	C	C	A	T	T	G	C	C	G	A	T	T	C	T	C	A
MUTA GANJE::IRGC 26744-1::[IRIS 313-9072]	IRIS 313-9072	IRGC 125847	ind2	11	C	G	G	G	C	C	A	A	C	A	G	G	T	G	T	C	G	G	A	C	T	G	C	A	G	G	T	G	T	C	C	A	T	T	G	C	C	G	A	T	T	C	T	C	A
SI MERIA::IRGC 66659-1::[IRIS 313-9098]	IRIS 313-9098		ind3	11	C	G	G	G	C	C	A	A	C	A	G	G	T	G	T	C	G	G	A	C	T	G	C	A	G	G	T	G	T	C	C	A	T	T	G	C	C	G	A	T	T	C	T	C	A
MANUS::IRGC 71570-1::[IRIS 313-9102]	IRIS 313-9102		ind3	11	C	G	G	G	C	C	A	A	C	A	G	G	T	G	T	C	G	G	A	C	T	G	C	A	G	G	T	G	T	C	C	A	T	T	G	C	C	G	A	T	T	C	T	C	A
BAJAR KUNING PAHIT::IRGC 17186-1::[IRIS 313-9117]	IRIS 313-9117	IRGC 131931	ind3	11	C	G	G	G	C	C	A	A	C	A	G	G	T	G	T	C	G	G	A	C	T	G	C	A	G	G	T	G	T	C	C	A	T	T	G	C	C	G	A	T	T	C	T	C	A
LEUANG GLIANG::IRGC 71271-1::[IRIS 313-9123]	IRIS 313-9123	IRGC 125823	subtrop	11	C	G	G	G	C	C	A	A	C	A	G	G	T	G	T	C	G	G	A	C	T	G	C	A	G	G	T	G	T	C	C	A	T	T	G	C	C	G	A	T	T	C	T	C	A
TUMBA::IRGC 66681-1::[IRIS 313-9188]	IRIS 313-9188	IRGC 126288	ind3	11	C	G	G	G	C	C	A	A	C	A	G	G	T	G	T	C	G	G	A	C	T	G	C	A	G	G	T	G	T	C	C	A	T	T	G	C	C	G	A	T	T	C	T	C	A
KHAO PONG AEV::IRGC 29820-1::[IRIS 313-9198]	IRIS 313-9198		ind3	11	C	G	G	G	C	C	A	A	C	A	G	G	T	G	T	C	G	G	A	C	T	G	C	A	G	G	T	G	T	C	C	A	T	T	G	C	C	G	A	T	T	C	T	C	A
CHI SHENG TAO::IRGC 4606-1::[IRIS 313-9204]	IRIS 313-9204	IRGC 125704	ind1A	11	C	G	G	G	C	C	A	A	C	A	G	G	T	G	T	C	G	G	A	C	T	G	C	A	G	G	T	G	T	C	C	A	T	T	G	C	C	G	A	T	T	C	T	C	A
LEUANG LAI MAE PRAJAN::IRGC 71279-1::[IRIS 313-9209]	IRIS 313-9209	IRGC 126984	ind3	11	C	G	G	G	C	C	A	A	C	A	G	G	T	G	T	C	G	G	A	C	T	G	C	A	G	G	T	G	T	C	C	A	T	T	G	C	C	G	A	T	T	C	T	C	A
WP 65::IRGC 36526-1::[IRIS 313-9227]	IRIS 313-9227	IRGC 126013	ind1B	11	C	G	G	G	C	C	A	A	C	A	G	G	T	G	T	C	G	G	A	C	T	G	C	A	G	G	T	G	T	C	C	A	T	T	G	C	C	G	A	T	T	C	T	C	A
YONG JIN ZAO 3::IRGC 70441-1::[IRIS 313-9253]	IRIS 313-9253	IRGC 125946	ind1A	11	C	G	G	G	C	C	A	A	C	A	G	G	T	G	T	C	G	G	A	C	T	G	C	A	G	G	T	G	T	C	C	A	T	T	G	C	C	G	A	T	T	C	T	C	A
G 25::IRGC 45733-1::[IRIS 313-9259]	IRIS 313-9259	IRGC 126150	ind2	11	C	G	G	G	C	C	A	A	C	A	G	G	T	G	T	C	G	G	A	C	T	G	C	A	G	G	T	G	T	C	C	A	T	T	G	C	C	G	A	T	T	C	T	C	A
CHIRGUA 1 I 22::IRGC 3408-1::[IRIS 313-9267]	IRIS 313-9267	IRGC 125703	trop	10.5	C	G	G	G	C	C	A	A	C	A	G	G	T	G	T	C	G	G	A	C	T	G	C	A	G	G	T	A/G	T	C	C	A	T	T	G	C	C	G	A	T	T	C	T	C	A
PURA BINNI::IRGC 26772-1::[IRIS 313-9271]	IRIS 313-9271	IRGC 125878	ind2	11	C	G	G	G	C	C	A	A	C	A	G	G	T	G	T	C	G	G	A	C	T	G	C	A	G	G	T	G	T	C	C	A	T	T	G	C	C	G	A	T	T	C	T	C	A
RADEN SAWO 1::IRGC 57578-1::[IRIS 313-9273]	IRIS 313-9273		ind3	10.5	C	G	G	G	C	C	A	A	C	A	G	G	T	G	T	C	G	G	A	C	T	G	C	A	G	G	T	G	T	C	C	A	T	T	G	C	C	G	A	T	T	C	T	C	A
TONG MAH::IRGC 65577-1::[IRIS 313-9288]	IRIS 313-9288		ind3	11	C	G	G	G	C	C	A	A	C	A	G	G	T	G	T	C	G	G	A	C	T	G	C	A	G	G	T	G	T	C	C	A	T	T	G	C	C	G	A	T	T	C	T	C	A
VEN THAP::IRGC 56138-1::[IRIS 313-9317]	IRIS 313-9317	IRGC 125933	indx	11	C	G	G	G	C	C	A	A	C	A	G	G	T	G	T	C	G	G	A	C	T	G	C	A	G	G	T	G	T	C	C	A	T	T	G	C	C	G	A	T	T	C	T	C	A
CHIH SHEN LI::IRGC 1306-1::[IRIS 313-9324]	IRIS 313-9324	IRGC 125702	ind1A	11	C	G	G	G	C	C	A	A	C	A	G	G	T	G	T	C	G	G	A	C	T	G	C	A	G	G	T	G	T	C	C	A	T	T	G	C	C	G	A	T	T	C	T	C	A
SADA RUPA::IRGC 77299-1::[IRIS 313-9325]	IRIS 313-9325	IRGC 125894	ind1B	11	C	G	G	G	C	C	A	A	C	A	G	G	T	G	T	C	G	G	A	C	T	G	C	A	G	G	T	G	T	C	C	A	T	T	G	C	C	G	A	T	T	C	T	C	A
HAM 48::IRGC 29740-1::[IRIS 313-9357]	IRIS 313-9357	IRGC 128532	ind3	11	C	G	G	G	C	C	A	A	C	A	G	G	T	G	T	C	G	G	A	C	T	G	C	A	G	G	T	G	T	C	C	A	T	T	G	C	C	G	A	T	T	C	T	C	A
IMPROVED BLUE ROSE::IRGC 5022-1::[IRIS 313-9366]	IRIS 313-9366	IRGC 125771	japx	11	C	G	G	G	C	C	A	A	C	A	G	G	T	G	T	C	G	G	A	C	T	G	C	A	G	G	T	G	T	C	C	A	T	T	G	C	C	G	A	T	T	C	T	C	A
WI BIR SHUN::IRGC 4602-1::[IRIS 313-9372]	IRIS 313-9372	IRGC 125937	ind1A	11	C	G	G	G	C	C	A	A	C	A	G	G	T	G	T	C	G	G	A	C	T	G	C	A	G	G	T	G	T	C	C	A	T	T	G	C	C	G	A	T	T	C	T	C	A
HWANGJO::IRGC 55547-1::[IRIS 313-9379]	IRIS 313-9379	IRGC 125768	temp	11	C	G	G	G	C	C	A	A	C	A	G	G	T	G	T	C	G	G	A	C	T	G	C	A	G	G	T	G	T	C	C	A	T	T	G	C	C	G	A	T	T	C	T	C	A
BARIK KUDI::IRGC 52807-1::[IRIS 313-9384]	IRIS 313-9384	IRGC 125674	ind2	11	C	G	G	G	C	C	A	A	C	A	G	G	T	G	T	C	G	G	A	C	T	G	C	A	G	G	T	G	T	C	C	A	T	T	G	C	C	G	A	T	T	C	T	C	A
LEUANG SAWED::IRGC 78268-1::[IRIS 313-9406]	IRIS 313-9406		ind3	11	C	G	G	G	C	C	A	A	C	A	G	G	T	G	T	C	G	G	A	C	T	G	C	A	G	G	T	G	T	C	C	A	T	T	G	C	C	G	A	T	T	C	T	C	A
E 2024::IRGC 67958-1::[IRIS 313-9482]	IRIS 313-9482	IRGC 125730	ind1B	11	C	G	G	G	C	C	A	A	C	A	G	G	T	G	T	C	G	G	A	C	T	G	C	A	G	G	T	G	T	C	C	A	T	T	G	C	C	G	A	T	T	C	T	C	A
TIMA::IRGC 67856-1::[IRIS 313-9506]	IRIS 313-9506		admix	11	C	G	G	G	C	C	A	A	C	A	G	G	T	G	T	C	G	G	A	C	T	G	C	A	G	G	T	G	T	C	C	A	T	T	G	C	C	G	A	T	T	C	T	C	A
WANICA::IRGC 3394-1::[IRIS 313-9519]	IRIS 313-9519	IRGC 125936	trop	11	C	G	G	G	C	C	A	A	C	A	G	G	T	G	T	C	G	G	A	C	T	G	C	A	G	G	T	G	T	C	C	A	T	T	G	C	C	G	A	T	T	C	T	C	A
RIKUTO KEMOCHI::[IRIS 313-9523]	IRIS 313-9523	IRGC 117569	japx	11	C	G	G	G	C	C	A	A	C	A	G	G	T	G	T	C	G	G	A	C	T	G	C	A	G	G	T	G	T	C	C	A	T	T	G	C	C	G	A	T	T	C	T	C	A
DAGPA BARA::IRGC 64887-1::[IRIS 313-9529]	IRIS 313-9529	IRGC 125720	subtrop	11	C	G	G	G	C	C	A	A	C	A	G	G	T	G	T	C	G	G	A	C	T	G	C	A	G	G	T	G	T	C	C	A	T	T	G	C	C	G	A	T	T	C	T	C	A
CHUA DAU::IRGC 4785-1::[IRIS 313-9555]	IRIS 313-9555	IRGC 120914	indx	11	C	G	G	G	C	C	A	A	C	A	G	G	T	G	T	C	G	G	A	C	T	G	C	A	G	G	T	G	T	C	C	A	T	T	G	C	C	G	A	T	T	C	T	C	A
KHAO CHUAN CHOM 452::IRGC 36571-1::[IRIS 313-9567]	IRIS 313-9567	IRGC 131914	ind3	11	C	G	G	G	C	C	A	A	C	A	G	G	T	G	T	C	G	G	A	C	T	G	C	A	G	G	T	G	T	C	C	A	T	T	G	C	C	G	A	T	T	C	T	C	A
NX 3533::IRGC 63796-1::[IRIS 313-9570]	IRIS 313-9570	IRGC 125859	indx	11	C	G	G	G	C	C	A	A	C	A	G	G	T	G	T	C	G	G	A	C	T	G	C	A	G	G	T	G	T	C	C	A	T	T	G	C	C	G	A	T	T	C	T	C	A
SADOK::IRGC 13334-1::[IRIS 313-9582]	IRIS 313-9582	IRGC 131917	ind3	11	C	G	G	G	C	C	A	A	C	A	G	G	T	G	T	C	G	G	A	C	T	G	C	A	G	G	T	G	T	C	C	A	T	T	G	C	C	G	A	T	T	C	T	C	A
HTA 22::IRGC 45827-1::[IRIS 313-9602]	IRIS 313-9602	IRGC 125765	indx	11	C	G	G	G	C	C	A	A	C	A	G	G	T	G	T	C	G	G	A	C	T	G	C	A	G	G	T	G	T	C	C	A	T	T	G	C	C	G	A	T	T	C	T	C	A
NCS 194::IRGC 51932-1::[IRIS 313-9605]	IRIS 313-9605	IRGC 125852	ind1A	11	C	G	G	G	C	C	A	A	C	A	G	G	T	G	T	C	G	G	A	C	T	G	C	A	G	G	T	G	T	C	C	A	T	T	G	C	C	G	A	T	T	C	T	C	A
WANGA BARUGULU::IRGC 52261-1::[IRIS 313-9611]	IRIS 313-9611	IRGC 125935	ind2	11	C	G	G	G	C	C	A	A	C	A	G	G	T	G	T	C	G	G	A	C	T	G	C	A	G	G	T	G	T	C	C	A	T	T	G	C	C	G	A	T	T	C	T	C	A
NAZIRA SAIL::IRGC 77284-1::[IRIS 313-9696]	IRIS 313-9696	IRGC 125850	indx	11	C	G	G	G	C	C	A	A	C	A	G	G	T	G	T	C	G	G	A	C	T	G	C	A	G	G	T	G	T	C	C	A	T	T	G	C	C	G	A	T	T	C	T	C	A
TAITUNG WOO LI::IRGC 111-1::[IRIS 313-9705]	IRIS 313-9705	IRGC 125914	ind1A	11	C	G	G	G	C	C	A	A	C	A	G	G	T	G	T	C	G	G	A	C	T	G	C	A	G	G	T	G	T	C	C	A	T	T	G	C	C	G	A	T	T	C	T	C	A
TAIPEI WOO CO::IRGC 112-1::[IRIS 313-9706]	IRIS 313-9706	IRGC 125913	ind1A	11	C	G	G	G	C	C	A	A	C	A	G	G	T	G	T	C	G	G	A	C	T	G	C	A	G	G	T	G	T	C	C	A	T	T	G	C	C	G	A	T	T	C	T	C	A
DA DAO TOU::IRGC 59499-1::[IRIS 313-9725]	IRIS 313-9725	IRGC 125718	temp	11	C	G	G	G	C	C	A	A	C	A	G	G	T	G	T	C	G	G	A	C	T	G	C	A	G	G	T	G	T	C	C	A	T	T	G	C	C	G	A	T	T	C	T	C	A
BA SHI ZAO::IRGC 67903-1::[IRIS 313-9730]	IRIS 313-9730	IRGC 125675	ind1A	11	C	G	G	G	C	C	A	A	C	A	G	G	T	G	T	C	G	G	A	C	T	G	C	A	G	G	T	G	T	C	C	A	T	T	G	C	C	G	A	T	T	C	T	C	A
I KUNG PAO::IRGC 114-1::[IRIS 313-9758]	IRIS 313-9758	IRGC 125770	ind1A	11	C	G	G	G	C	C	A	A	C	A	G	G	T	G	T	C	G	G	A	C	T	G	C	A	G	G	T	G	T	C	C	A	T	T	G	C	C	G	A	T	T	C	T	C	A
CI 9445::IRGC 2081-1::[IRIS 313-9767]	IRIS 313-9767	IRGC 125711	indx	11	C	G	G	G	C	C	A	A	C	A	G	G	T	G	T	C	G	G	A	C	T	G	C	A	G	G	T	G	T	C	C	A	T	T	G	C	C	G	A	T	T	C	T	C	A
BERGREIS::IRGC 3150-1::[IRIS 313-9771]	IRIS 313-9771	IRGC 126185	temp	11	C	G	G	G	C	C	A	A	C	A	G	G	T	G	T	C	G	G	A	C	T	G	C	A	G	G	T	G	T	C	C	A	T	T	G	C	C	G	A	T	T	C	T	C	A
KAHEI::IRGC 7691-1::[IRIS 313-9800]	IRIS 313-9800	IRGC 126981	trop	11	C	G	G	G	C	C	A	A	C	A	G	G	T	G	T	C	G	G	A	C	T	G	C	A	G	G	T	G	T	C	C	A	T	T	G	C	C	G	A	T	T	C	T	C	A
SZANISZLO 2::IRGC 9353-1::[IRIS 313-9813]	IRIS 313-9813	IRGC 125908	temp	11	C	G	G	G	C	C	A	A	C	A	G	G	T	G	T	C	G	G	A	C	T	G	C	A	G	G	T	G	T	C	C	A	T	T	G	C	C	G	A	T	T	C	T	C	A
TEPUKE::IRGC 12872-1::[IRIS 313-9838]	IRIS 313-9838	IRGC 125919	temp	11	C	G	G	G	C	C	A	A	C	A	G	G	T	G	T	C	G	G	A	C	T	G	C	A	G	G	T	G	T	C	C	A	T	T	G	C	C	G	A	T	T	C	T	C	A
CHANDINA::IRGC 36420-1::[IRIS 313-9917]	IRIS 313-9917	IRGC 125699	ind1B	11	C	G	G	G	C	C	A	A	C	A	G	G	T	G	T	C	G	G	A	C	T	G	C	A	G	G	T	G	T	C	C	A	T	T	G	C	C	G	A	T	T	C	T	C	A
MEKENZIE SMALL::IRGC 49895-1::[IRIS 313-9935]	IRIS 313-9935	IRGC 126167	ind2	11	C	G	G	G	C	C	A	A	C	A	G	G	T	G	T	C	G	G	A	C	T	G	C	A	G	G	T	G	T	C	C	A	T	T	G	C	C	G	A	T	T	C	T	C	A
TIKAL 3::IRGC 50649-1::[IRIS 313-9940]	IRIS 313-9940	IRGC 125923	ind1B	11	C	G	G	G	C	C	A	A	C	A	G	G	T	G	T	C	G	G	A	C	T	G	C	A	G	G	T	G	T	C	C	A	T	T	G	C	C	G	A	T	T	C	T	C	A
WIR 1391::IRGC 51605-1::[IRIS 313-9963]	IRIS 313-9963		aus	11	C	G	G	G	C	C	A	A	C	A	G	G	T	G	T	C	G	G	A	C	T	G	C	A	G	G	T	G	T	C	C	A	T	T	G	C	C	G	A	T	T	C	T	C	A
CICA 9::IRGC 53079-1::[IRIS 313-9966]	IRIS 313-9966	IRGC 125713	ind1B	11	C	G	G	G	C	C	A	A	C	A	G	G	T	G	T	C	G	G	A	C	T	G	C	A	G	G	T	G	T	C	C	A	T	T	G	C	C	G	A	T	T	C	T	C	A
KULA KARUPPAN::IRGC 55328-1::[IRIS 313-9968]	IRIS 313-9968	IRGC 125810	indx	11	C	G	G	G	C	C	A	A	C	A	G	G	T	G	T	C	G	G	A	C	T	G	C	A	G	G	T	G	T	C	C	A	T	T	G	C	C	G	A	T	T	C	T	C	A
FORTUNA INIA::IRGC 55865-1::[IRIS 313-9980]	IRIS 313-9980	IRGC 125741	japx	11	C	G	G	G	C	C	A	A	C	A	G	G	T	G	T	C	G	G	A	C	T	G	C	A	G	G	T	G	T	C	C	A	T	T	G	C	C	G	A	T	T	C	T	C	A
SOM DIGUIME::IRGC 56751-1::[IRIS 313-9986]	IRIS 313-9986	IRGC 126168	indx	11	C	G	G	G	C	C	A	A	C	A	G	G	T	G	T	C	G	G	A	C	T	G	C	A	G	G	T	G	T	C	C	A	T	T	G	C	C	G	A	T	T	C	T	C	A
MELEKE::IRGC 56823-1::[IRIS 313-9989]	IRIS 313-9989	IRGC 125838	ind3	11	C	G	G	G	C	C	A	A	C	A	G	G	T	G	T	C	G	G	A	C	T	G	C	A	G	G	T	G	T	C	C	A	T	T	G	C	C	G	A	T	T	C	T	C	A
SUWEON 295::IRGC 58368-1::[IRIS 313-9996]	IRIS 313-9996	IRGC 126990	temp	11	C	G	G	G	C	C	A	A	C	A	G	G	T	G	T	C	G	G	A	C	T	G	C	A	G	G	T	G	T	C	C	A	T	T	G	C	C	G	A	T	T	C	T	C	A
HONGWAN 1::[B120]	B120		indx	9.5	C	G	G	G	C	C	A	A	C	A	G	G	T	G	T	C	G	G	A	C	T	G	C	A	G	G	T	G	T	C	C	A	T	T	G	C	C	G	A	T	T	C	T	C	A
GUI HUA ZAO::IRGC 68060-1::[IRIS 313-10179]	IRIS 313-10179	IRGC 125755	indx	11	C	G	G	G	C	C	A	A	C	A	G	G	T	G	T	C	G	G	A	C	T	G	C	A	G	G	T	G	T	C	C	A	T	T	G	C	C	G	A	T	T	C	T	C	A
ICTA CRISPO 38::IRGC 116994-1::[IRIS 313-10274]	IRIS 313-10274	IRGC 125967	ind1B	11	C	G	G	G	C	C	A	A	C	A	G	G	T	G	T	C	G	G	A	C	T	G					T	G	T	C	C	A	T	T	G	C	C	G	A	T	T	C	T	C	A
CSR-90 IR-2::IRGC 117327-1::[IRIS 313-10349]	IRIS 313-10349	IRGC 120921	indx	11	C	G	G	G	C	C	A	A	C	A	G	G	T	G	T	C	G	G	A	C	T	G	C	A	G	G	T	G	T	C	C	A	T	T	G	C	C	G	A	T	T	C	T	C	A
BINOLAYANGUN::IRGC 791-2::[IRIS 313-10448]	IRIS 313-10448	IRGC 127996	ind3	11	C	G	G	G	C	C	A	A	C	A	G	G	T	G	T	C	G	G	A	C	T	G	C	A	G	G	T	G	T	C	C	A	T	T	G	C	C	G	A	T	T	C	T	C	A
ARC 11822::IRGC 21677-1::[IRIS 313-10873]	IRIS 313-10873	IRGC 127140	aus	11	C	G	G	G	C	C	A	A	C	A	G	G	T	G	T	C	G	G	A	C	T	G	C	A	G	G	T	G	T	C	C	A	T	T	G	C	C	G	A	T	T	C	T	C	A
PULU RENNI::IRGC 27386-1::[IRIS 313-11006]	IRIS 313-11006	IRGC 127747	ind3	11	C	G	G	G	C	C	A	A	C	A	G	G	T	G	T	C	G	G	A	C	T	G	C	A	G	G	T	G	T	C	C	A	T	T	G	C	C	G	A	T	T	C	T	C	A
AC 74::IRGC 33967-1::[IRIS 313-11152]	IRIS 313-11152	IRGC 127103	ind1A	11	C	G	G	G	C	C	A	A	C	A	G	G	T	G	T	C	G	G	A	C	T	G	C	A	G	G	T	G	T	C	C	A	T	T	G	C	C	G	A	T	T	C	T	C	A
LIONG ORN::IRGC 38875-2::[IRIS 313-11236]	IRIS 313-11236	IRGC 128523	ind3	11	C	G	G	G	C	C	A	A	C	A	G	G	T	G	T	C	G	G	A	C	T	G	C	A	G	G	T	G	T	C	C	A	T	T	G	C	C	G	A	T	T	C	T	C	A
BR 51-115-4::IRGC 43999-1::[IRIS 313-11326]	IRIS 313-11326	IRGC 127237	indx	11	C	G	G	G	C	C	A	A	C		G	G	T	G	T	C	G	G	A	C	T	G	C	A	G	G	T	G	T	C	C	A	T	T	G	C	C	G	A	T	T	C	T	C	A
NAPDAI::IRGC 52009-1::[IRIS 313-11446]	IRIS 313-11446	IRGC 127647	ind2	11	C	G	G	G	C	C	A	A	C	A	G	G	T	G	T	C	G	G	A	C	T	G	C	A	G	G	T	G	T	C	C	A	T	T	G	C	C	G	A	T	T	C	T	C	A
YAH YAW::IRGC 61359-1::[IRIS 313-11611]	IRIS 313-11611	IRGC 127898	trop	11	C	G	G	G	C	C	A	A	C	A	G	G	T	G	T	C	G	G	A	C	T	G	C	A	G	G	T	G	T	C	C	A	T	T	G	C	C	G	A	T	T	C	T	C	A
TUI (KIDAYAN)::IRGC 79058-1::[IRIS 313-11996]	IRIS 313-11996	IRGC 127869	ind3	11	C	G	G	G	C	C	A	A	C	A	G	G	T	G	T	C	G	G	A	C	T	G	C	A	G	G	T	G	T	C	C	A	T	T	G	C	C	G	A	T	T	C	T	C	A
SAFARI::GERVEX 1256-C1::[IRIS 313-8136]	IRIS 313-8136	IRGC 121819	temp	11	C	G	G	G	C	C	A	A	C	A	G	G	T	G	T	C	G	G	A	C	T	G	C	A	G	G	T	G	T	C	C	A	T	T	G	C	C	G	A	T	T	C	T	C	A
SAN CHIAO TSWEN::IRGC 1565-1::[IRIS 313-8380]	IRIS 313-8380	IRGC 126123	ind1A	11	C	G	G	G	C	C	A	A	C	A	G	G	T	G	T	C	G	G	A	C	T	G	C	A	G	G	T	G	T	C	C	A	T	T	G	C	C	G	A	T	T	C	T	C	A
E WAWNG::IRGC 71140-1::[IRIS 313-8884]	IRIS 313-8884	IRGC 126134	subtrop	10	C	G	G	G	C	C	A	A	C	A	G	G	T	G	T	C	G	G	A	C	T	T/G	C	A	G	G	T	G	T	C	C	A	T	T	G	C	C	G	A	T	T	C	T	C	A
ARC 14654::IRGC 41663-1::[IRIS 313-8900]	IRIS 313-8900	IRGC 125650	ind2	10.5	C	G	G	G	C	C	A	A	C	A	G	G	T	G	T	C	G	G	A	C	T	G	C	A	G	G	T	G	T	C	C	A	T	T	G	C	C	G	A	T	T	C	T	C	A
MACAN BINUNDOK::IRGC 8245-1::[IRIS 313-9243]	IRIS 313-9243	IRGC 126239	indx	11	C	G	G	G	C	C	A	A	C	A	G	G	T	G	T	C	G	G	A	C	T	G	C	A	G	G	T	G	T	C	C	A	T	T	G	C	C	G	A	T	T	C	T	C	A
PUTEH KACA::IRGC 66614-1::[IRIS 313-9310]	IRIS 313-9310	IRGC 131946	ind3	11	C	G	G	G	C	C	A	A	C	A	G	G	T	G	T	C	G	G	A	C	T	G	C	A	G	G	T	G	T	C	C	A	T	T	G	C	C	G	A	T	T	C	T	C	A
PAHK NOK GAEW::IRGC 64572-1::[IRIS 313-9415]	IRIS 313-9415		ind3	11	C	G	G	G	C	C	A	A	C	A	G	G	T	G	T	C	G	G	A	C	T	G	C	A	G	G	T	G	T	C	C	A	T	T	G	C	C	G	A	T	T	C	T	C	A
FEDEARROZ 50::G1::[IRIS 313-15896]	IRIS 313-15896	IRGC 126957	ind1B	11	C	G	G	G	C	C	A	A	C	A	G	G	T	G	T	C	G	G	A	C	T	G	C	A	G	G	T	G	T	C	C	A	T	T	G	C	C	G	A	T	T	C	T	C	A
PA KABAKIE::IRGC 58541-1::[IRIS 313-9687]	IRIS 313-9687		indx	11	C	G	G	G	C	C	A	A	C	A	G	G	T	G	T	C	G	G	A	C	T	G	C	A	G	G	T	G	T	C	C	A	T	T	G	C	C	G	A	T	T	C	T	C	A
ANLINGWUBAILI::IRGC 93363-1::[IRIS 313-12234]	IRIS 313-12234	IRGC 127124	ind1B	11	C	G	G	G	C	C	A	A	C	A	G	G	T	G	T	C	G	G	A	C	T	G	C	A	G	G	T	G	T	C	C	A	T	T	G	C	C	G	A	T	T	C	T	C	A
SAITA::IRGC 31618-1::[IRIS 313-11111]	IRIS 313-11111	IRGC 127778	aus	11	C	G	G	G	C	C	A	A	C	A	G	G	T	G	T	C	G	G	A	C	T	G	C	A	G	G	T	G	T	C	C	A	T	T	G	C	C	G	A	T	T	C	T	C	A
RUJAK DANAN::IRGC 35446-2::[IRIS 313-11178]	IRIS 313-11178	IRGC 128152	ind3	11	C	G	G	G	C	C	A	A	C	A	G	G	T	G	T	C	G	G	A	C	T	G	C	A	G	G	T	G	T	C	C	A	T	T	G	C	C	G	A	T	T	C	T	C	A
CYLINDRICAL 30-605::IRGC 37845-2::[IRIS 313-11221]	IRIS 313-11221	IRGC 128022	ind2	11	C	G	G	G	C	C	A	A	C	A	G	G	T	G	T	C	G	G	A	C	T	G	C	A	G	G	T	G	T	C	C	A	T	T	G	C	C	G	A	T	T	C	T	C	A
BKN 7130-1017-2::IRGC 36531-2::[IRIS 313-11192]	IRIS 313-11192	IRGC 127997	ind3	11	C	G	G	G	C	C	A	A	C	A	G	G	T	G	T	C	G	G	A	C	T	G	C	A	G	G	T	G	T	C	C	A	T	T	G	C	C	G	A	T	T	C	T	C	A
PAWNG AEW 1::IRGC 55263-1::[IRIS 313-11508]	IRIS 313-11508	IRGC 127722	ind3	11	C	G	G	G	C	C	A	A	C	A	G	G	T	G	T	C	G	G	A	C	T	G	C	A	G	G	T	G	T	C	C	A	T	T	G	C	C	G	A	T	T	C	T	C	A
GAO JIAO HONG::IRGC 80920-1::[IRIS 313-12033]	IRIS 313-12033	IRGC 127377	ind1A	11	C	G	G	G	C	C	A	A	C	A	G	G	T	G	T	C	G	G	A	C	T	G	C	A	G	G	T	G	T	C	C	A	T	T	G	C	C	G	A	T	T	C	T	C	A
SI HAO NDURIA::IRGC 66649-1::[IRIS 313-8608]	IRIS 313-8608	IRGC 132385	ind3	11	C	G	G	G	C	C	A	A	C	A	G	G	T	G	T	C	G	G	A	C	T	G	C	A	G	G	T	G	T	C	C	A	T	T	G	C	C	G	A	T	T	C	T	C	A
XISHI 15::[B134]	B134		subtrop	11	C	G	G	G	C	C	A	A	C	A	G	G	T	G	T	C	G	G	A	C	T	G	C	A	G	G	T	G	T	C	C	A	T	T	G	C	C	G	A	T	T	C	T	C	A
RELLY::IRGC 14623-1::[IRIS 313-8812]	IRIS 313-8812	IRGC 126160	ind3	11	C	G	G	G	C	C	A	A	C	A	G	G	T	G	T	C	G	G	A	C	T	G	C	A	G	G	T	G	T	C	C	A	T	T	G	C	C	G	A	T	T	C	T	C	A
NALUMOOLAI KARUPAN::IRGC 8993-1::[IRIS 313-9809]	IRIS 313-9809		ind3	11	C	G	G	G	C	C	A	A	C	A	G	G	T	G	T	C	G	G	A	C	T	G	C	A	G	G	T	G	T	C	C	A	T	T	G	C	C	G	A	T	T	C	T	C	A
SLK 2-18-2::[B185]	B185	IRGC 136048	indx	11	C	G	G	G	C	C	A	A	C	A	G	G	T	G	T	C	G	G	A	C	T	G	C	A	G	G	T	G	T	C	C	A	T	T	G	C	C	G	A	T	T	C	T	C	A
HSIEH DAU::IRGC 4727-1::[IRIS 313-10504]	IRIS 313-10504	IRGC 127419	ind1A	11	C	G	G	G	C	C	A	A	C	A	G	G	T	G	T	C	G	G	A	C	T	G	C	A	G	G	T	G	T	C	C	A	T	T	G	C	C	G	A	T	T	C	T	C	A
SITANDANG::IRGC 24681-1::[IRIS 313-10940]	IRIS 313-10940	IRGC 127814	ind3	11	C	G	G	G	C	C	A	A	C	A	G	G	T	G	T	C	G	G	A	C	T	G	C	A	G	G	T	G	T	C	C	A	T	T	G	C	C	G	A	T	T	C	T	C	A
TIEN SOM::IRGC 40759-2::[IRIS 313-11254]	IRIS 313-11254	IRGC 128186	ind3	11	C	G	G	G	C	C	A	A	C	A	G	G	T	G	T	C	G	G	A	C	T	G	C	A	G	G	T	G	T	C	C	A	T	T	G	C	C	G	A	T	T	C	T	C	A
R644::[CX13]	CX13		indx	11	C	G	G	G	C	C	A	A	C	A	G	G	T	G	T	C	G	G	A	C	T	G	C	A	G	G	T	G	T	C	C	A	T	T	G	C	C	G	A	T	T	C	T	C	A
IRBB62::[CX369]	CX369	IRGC 135947	ind1B	11	C	G	G	G	C	C	A	A	C	A	G	G	T	G	T	C	G	G	A	C	T	G	C	A	G	G	T	G	T	C	C	A	T	T	G	C	C	G	A	T	T	C	T	C	A
IRGA 318-11-6-9-2B::IRGC 117339-1::[IRIS 313-10397]	IRIS 313-10397	IRGC 120991	ind1B	11	C	G	G	G	C	C	A	A	C	A	G	G	T	G	T	C	G	G	A	C	T	G	C	A	G	G	T	G	T	C	C	A	T	T	G	C	C	G	A	T	T	C	T	C	A
LONG GE 33::IRGC 63705-1::[IRIS 313-11666]	IRIS 313-11666	IRGC 127573	indx	11.5	C	G	G	G	C	C	A	A	C	A	G	G	T	G	T	C	G	G	A	C	T	G	C	A	G	G	T	G	T	C	C	A	T	T	G	C	C	G	A	T	T	C	T	C	A
MELABOH::IRGC 66597-1::[IRIS 313-8493]	IRIS 313-8493	IRGC 128537	ind3	11	C	G	G	G	C	C	A	A	C	A	G	G	T	G	T	C	G	G	A	C	T	G	C	A	G	G	T	G	T	C	C	A	T	T	G	C	C	G	A	T	T	C	T	C	A
BANIKAT::IRGC 67720-1::[IRIS 313-8988]	IRIS 313-8988	IRGC 125672	ind2	11	C	G	G	G	C	C	A	A	C	A	G	G	T	G	T	C	G	G	A	C	T	G	C	A	G	G	T	G	T	C	C	A	T	T	G	C	C	G	A	T	T	C	T	C	A
ZAOSHUXIANGHEIMI::[B123]	B123		indx	11	C	G	G	G	C	C	A	A	C	A	G	G	T	G	T	C	G	G	A	C	T	G	C	A	G	G	T	G	T	C	C	A	T	T	G	C	C	G	A	T	T	C	T	C	A
NINGHUI 21::[B142]	B142		admix	9	C	G	G	G	C	C	A	A	C	A	G	G	T	G	T	C	G	G	A	C	T	G	C	A	G	G	T	G	T	C	C	A	T	T	G	C	C	G	A	T	T	C	T	C	A
NANTEHAO::[B062]	B062		ind1A	11	C	G	G	G	C	C	A	A	C	A	G	G	T	G	T	C	G	G	A	C	T	G	C	A	G	G	T	G	T	C	C	A	T	T	G	C	C	G	A	T	T	C	T	C	A
GUIZHAO 2::[B063]	B063		ind1A	11	C	G	G	G	C	C	A	A	C	A	G	G	T	G	T	C	G	G	A	C	T	G	C	A	G	G	T	G	T	C	C	A	T	T	G	C	C	G	A	T	T	C	T	C	A
MOMI::[B238]	B238		indx	12	C	G	G	G	C	C	A	A	C	A	G	G	T	G	T	C	G	G		C	T	G	C	A	G	G	T	G	T	C	C	A	T	T	G	C	C	G	A	T	T	C	T	C	A
CO43::[CX146]	CX146	IRGC 135871	indx	11	C	G	G	G	C	C	A	A	C	A	G	G	T	G	T	C	G	G	A	C	T	G	C	A	G	G	T	G	T	C	C	A	T	T	G	C	C	G	A	T	T	C	T	C	A
OM997::[CX37]	CX37	IRGC 136015	ind1B	11	C	G	G	G	C	C	A	A	C	A	G	G	T	G	T	C	G	G	A	C	T	G	C		G	G	T	G	T	C	C	A	T	T	G	C	C	G	A	T	T	C	T	C	A
CX422::[CX422]	CX422		ind1B	11	C	G	G	G	C	C	A	A	C	A	G	G	T	G	T	C	G	G	A	C		G	C	A	G	G	T	G	T	C	C	A	T	T	G	C	C	G	A	T	T	C	T	C	A
BHAVANI::[CX61]	CX61	IRGC 135844	ind1A	11	C	G	G	G	C	C	A	A	C	A	G	G	T	G	T	C	G	G	A	C	T	G	C	A	G	G	T	G	T	C	C	A	T	T	G	C	C	G	A	T	T	C	T	C	A
RIZ INDETERMINE::IRGC 69014-1::[IRIS 313-10034]	IRIS 313-10034	IRGC 125886	indx	11	C	G	G	G	C	C	A	A	C	A	G	G	T	G	T	C	G	G	A	C	T	G	C	A	G	G	T	G	T	C	C	A	T	T	G	C	C	G	A	T	T	C	T	C	A
ECIA 24-107-1::IRGC 116978-1::[IRIS 313-10293]	IRIS 313-10293	IRGC 125962	ind1B	11	C	G	G	G	C	C	A	A	C	A	G	G	T	G	T	C	G	G	A	C	T	G	C	A	G	G	T	G	T	C	C	A	T	T	G	C	C	G	A	T	T	C	T	C	A
IR 31142-14-1-1-3-1-1-2::IRGC 117378-1::[IRIS 313-10355]	IRIS 313-10355	IRGC 126023	indx	11	C	G	G	G	C	C	A	A	C	A	G	G	T	G	T	C	G	G	A	C	T	G	C	A	G	G	T	G	T	C	C	A	T	T	G	C	C	G	A	T	T	C	T	C	A
WAR 72-2-1-1::IRGC 117361-1::[IRIS 313-10421]	IRIS 313-10421	IRGC 121154	indx	11	C	G	G	G	C	C	A	A	C	A	G	G	T	G	T	C	G	G	A	C	T	G	C	A	G	G	T	G	T	C	C	A	T	T	G	C	C	G	A	T	T	C	T	C	A
CHAO PEUAK DENG::IRGC 11602-1::[IRIS 313-10652]	IRIS 313-10652	IRGC 127268	ind3	11	C	G	G	G	C	C	A	A	C	A	G	G	T	G	T	C	G	G	A	C	T	G	C	A	G	G	T	G	T	C	C	A	T	T	G	C	C	G	A	T	T	C	T	C	A
CHANTEK 145::IRGC 14045-1::[IRIS 313-10700]	IRIS 313-10700		ind3	15.5	C	G	G	G	C	C	A	A	C	A	G	G	T	G	T	C	G	G	A	C	T/C	T/G	C	A/G	G/T	G	T	G	T	C	C	A	T	T	G	C	C/T	G	A/T	T/C	T/C	C/T	T/C	C/T	A
TJ PERAK::IRGC 19141-1::[IRIS 313-10821]	IRIS 313-10821	IRGC 127862	ind3	11	C	G	G	G	C	C	A	A	C	A	G	G	T	G	T	C	G	G	A	C	T	G	C	A	G	G	T	G	T	C	C	A	T	T	G	C	C	G	A	T	T	C	T	C	A
SSAL BYEO::IRGC 19867-2::[IRIS 313-10838]	IRIS 313-10838	IRGC 132370	temp	11	C	G	G	G	C	C	A		C	A	G	G	T	G	T	C	G	G	A	C	T	G	C	A	G	G	T	G	T		C	A	T	T	G	C	C	G	A	T	T	C	T	C	A
ARC 11946::IRGC 21768-2::[IRIS 313-10874]	IRIS 313-10874	IRGC 132318	subtrop	11	C	G	G	G	C	C	A	A	C	A	G	G	T	G	T	C	G	G	A	C	T	G	C	A	G	G	T	G	T	C	C	A	T	T	G	C	C	G	A	T	T	C	T	C	A
BORA DIGA::IRGC 26439-1::[IRIS 313-10979]	IRIS 313-10979		aus	11	C	G	G	G	C	C	A	A	C	A	G	G	T	G	T	C	G	G	A	C	T	G	C	A	G	G	T	G	T	C	C	A	T	T	G	C	C	G	A	T	T	C	T	C	A
K 17-9-1-1::IRGC 36778-1::[IRIS 313-11197]	IRIS 313-11197	IRGC 127471	indx	10.5	C	G	G	G	C	C	A	A	C	A	G	G	T	G	T	C	G	G	A	C	T	T/G	C	A	G	G	T	G	T	C	C	A	T	T	G	C	C	G	A	T	T	C	T	C	A
SAHM RUANG NAK::IRGC 47818-1::[IRIS 313-11387]	IRIS 313-11387		ind3	11	C	G	G	G	C	C	A	A	C	A	G	G	T	G	T	C	G	G	A	C	T	G	C	A	G	G	T	G	T	C	C	A	T	T	G	C	C	G	A	T	T	C	T	C	A
TODULI::IRGC 48942-2::[IRIS 313-11398]	IRIS 313-11398	IRGC 128190	ind3	11	C	G	G	G	C	C	A	A	C	A	G	G	T	G	T	C	G	G	A	C	T	G	C	A	G	G	T	G	T	C	C	A	T	T	G	C	C	G	A	T	T	C	T	C	A
MATALI::IRGC 49891-2::[IRIS 313-11418]	IRIS 313-11418	IRGC 128106	ind2	11	C	G	G	G	C	C	A	A	C	A	G	G	T	G	T	C	G	G	A	C	T	G	C	A	G	G	T	G	T	C	C	A	T	T	G	C	C	G	A	T	T	C	T	C	A
NALA::IRGC 51247-1::[IRIS 313-11441]	IRIS 313-11441	IRGC 128399	trop	11	C	G	G	G	C	C	A	A	C	A	G	G	T	G	T	C	G	G	A	C	T	G	C	A	G	G	T	G	T	C	C	A	T	T	G	C	C	G	A	T	T	C	T	C	A
BANGBANG::IRGC 53131-1::[IRIS 313-11472]	IRIS 313-11472		ind3	11	C	G	G	G	C	C	A	A	C	A	G	G	T	G	T	C	G	G	A	C	T	G	C	A	G	G	T	G	T	C	C	A	T	T	G	C	C	G	A	T	T	C	T	C	A
J 6 IR 520 (WC 693)::IRGC 57600-1::[IRIS 313-11538]	IRIS 313-11538	IRGC 127447	ind1B	11	C	G	G	G	C	C	A	A	C	A	G	G	T	G	T	C	G	G	A	C	T	G	C	A	G	G	T	G	T	C	C	A	T	T	G	C	C	G	A	T	T	C	T	C	A
LANG QIAN CHE::IRGC 59730-1::[IRIS 313-11577]	IRIS 313-11577	IRGC 127551	ind1A	11	C	G	G	G	C	C	A	A	C	A	G	G	T	G	T	C	G	G	A	C	T	G	C	A	G	G	T	G	T	C	C	A	T	T	G	C	C	G	A	T	T	C	T	C	A
SHAN GU::IRGC 59870-1::[IRIS 313-11579]	IRIS 313-11579	IRGC 127797	ind1A	11	C	G	G	G	C	C	A	A	C	A	G	G	T	G	T	C	G	G	A	C	T	G	C	A	G	G	T	G	T	C	C	A	T	T	G	C	C	G	A	T	T	C	T	C	A
CHAMPION::IRGC 66327-1::[IRIS 313-11714]	IRIS 313-11714	IRGC 127256	indx	11	C	G	G	G	C	C	A	A	C	A	G	G	T	G	T	C	G	G	A	C	T	G	C	A	G	G	T	G	T	C	C	A	T	T	G	C	C	G	A	T	T	C	T	C	A
QING ZAO 3::IRGC 67281-1::[IRIS 313-11732]	IRIS 313-11732	IRGC 127755	ind1A	11	C	G	G	G	C	C	A	A	C	A	G	G	T	G	T	C	G	G	A	C	T	G	C	A	G	G	T	G	T	C	C	A	T	T	G	C	C	G	A	T	T	C	T	C	A
KHAO' NGAW::IRGC 74985-1::[IRIS 313-11923]	IRIS 313-11923	IRGC 128341	subtrop	11	C	G	G	G	C	C	A	A	C	A	G	G	T	G	T	C	G	G	A	C	T	G	C	A	G	G	T	G	T	C	C	A	T	T	G	C	C	G	A	T	T	C	T	C	A
MIAO ZHAN::IRGC 76691-1::[IRIS 313-11951]	IRIS 313-11951	IRGC 127625	ind1A	11	C	G	G	G	C	C	A	A	C	A	G	G	T	G	T	C	G	G	A	C	T	G	C	A	G	G	T	G	T	C	C	A	T	T	G	C	C	G	A	T	T	C	T	C	A
SHYAMJIRA::IRGC 77522-1::[IRIS 313-11969]	IRIS 313-11969	IRGC 135795	ind2	11	C	G	G	G	C	C	A	A	C	A	G	G	T	G	T	C	G	G	A	C	T	G	C	A	G	G	T	G	T	C	C	A	T	T	G	C	C	G	A	T	T	C	T	C	A
LI TOU ZHAN::IRGC 78550-1::[IRIS 313-11985]	IRIS 313-11985	IRGC 127567	indx	11	C	G	G	G	C	C	A	A	C	A	G	G	T	G	T	C	G	G	A	C	T	G	C	A	G	G	T	G	T	C	C	A	T	T	G	C	C	G	A	T	T	C	T	C	A
JIA GEN::IRGC 79654-1::[IRIS 313-12007]	IRIS 313-12007	IRGC 127457	indx	11	C	G	G	G	C	C	A	A	C	A	G	G	T	G	T	C	G	G	A	C	T	G	C	A	G	G	T	G	T	C	C	A	T	T	G	C	C	G	A	T	T	C	T	C	A
LIMA::IRGC 81487-1::[IRIS 313-12048]	IRIS 313-12048	IRGC 127564	ind3	11	C	G	G	G	C	C	A	A	C	A	G	G	T	G	T	C	G	G	A	C	T	G	C	A	G	G	T	G	T	C	C	A	T	T	G	C	C	G	A	T	T	C	T	C	A
SEQ 93::C1::[IRIS 313-7635]	IRIS 313-7635	IRGC 122247	ind1B	11	C	G	G	G	C	C	A	A	C	A	G	G	T	G	T	C	G	G	A	C	T	G	C	A	G	G	T	G	T	C	C	A	T	T	G	C	C	G	A	T	T	C	T	C	A
BOUAKE 189::C1::[IRIS 313-7654]	IRIS 313-7654	IRGC 126997	ind1B	11	C	G	G	G	C	C	A	A	C	A	G	G	T	G	T	C	G	G	A	C	T	G	C	A	G	G	T	G	T	C	C	A	T	T	G	C	C	G	A	T	T	C	T	C	A
GRITNA::GERVEX 71-C1::[IRIS 313-8029]	IRIS 313-8029	IRGC 122073	japx	11	C	G	G	G	C	C	A	A	C	A	G	G	T	G	T	C	G		A	C	T	G	C	A	G	G	T	G	T	C	C	A	T	T	G	C	C	G	A	T	T	C	T	C	A
75 UPLA::GERVEX 161-C1::[IRIS 313-8061]	IRIS 313-8061	IRGC 121954	trop	11	C	G	G	G	C	C	A	A	C	A	G	G	T	G	T	C	G	G	A	C	T	G	C	A	G	G	T	G	T	C	C	A	T	T	G	C	C	G	A	T	T	C	T	C	A
FRANCES::GERVEX 527-C1::[IRIS 313-8087]	IRIS 313-8087	IRGC 122051	temp	11	C	G	G	G	C	C	A	A	C	A	G	G	T	G	T	C	G	G	A	C	T	G	C	A	G	G	T	G	T	C	C	A	T	T	G	C	C	G	A	T	T	C	T	C	A
PLOVDIV 24::GERVEX 1168-C1::[IRIS 313-8126]	IRIS 313-8126	IRGC 122204	temp	11	C	G	G	G	C	C	A	A	C	A	G	G	T	G	T	C	G	G	A	C	T	G	C	A	G	G	T	G	T	C	C	A	T	T	G	C	C	G	A	T	T	C	T	C	A
POLIZESTI 28::GERVEX 1170-C1::[IRIS 313-8127]	IRIS 313-8127	IRGC 122207	temp	11	C	G	G	G	C	C	A	A	C	A	G	G	T	G	T	C	G	G	A	C	T	G	C	A	G	G	T	G	T	C	C	A	T	T	G	C	C	G	A	T	T	C	T	C	A
ARC 13252::IRGC 22604-1::[IRIS 313-8382]	IRIS 313-8382		admix	11	C	G	G	G	C	C	A	A	C	A	G	G	T	G	T	C	G	G	A	C	T	G	C	A	G	G	T	G	T	C	C	A	T	T	G	C	C	G	A	T	T	C	T	C	A
CHANG LE SAN SHU ZAO::IRGC 63561-1::[IRIS 313-8433]	IRIS 313-8433	IRGC 126115	ind1A	11	C	G	G	G	C	C	A	A	C	A	G	G	T	G	T	C	G	G	A	C	T	G	C	A	G	G	T	G	T	C	C	A	T	T	G	C	C	G	A	T	T	C	T	C	A
KHAO PRAHJIN::IRGC 64420-1::[IRIS 313-8702]	IRIS 313-8702		ind3	11	C	G	G	G	C	C	A	A	C	A	G	G	T	G	T	C	G	G	A	C	T	G	C	A	G	G	T	G	T	C	C	A	T	T	G	C	C	G	A	T	T	C	T	C	A
ROPA::IRGC 74774-1::[IRIS 313-8704]	IRIS 313-8704		ind2	11	C	G	G	G	C	C	A	A	C	A	G	G	T	G	T	C	G	G	A	C	T	G	C	A	G	G	T	G	T	C	C	A	T	T	G	C	C	G	A	T	T	C	T	C	A
KATUNG::IRGC 71536-1::[IRIS 313-8811]	IRIS 313-8811	IRGC 131940	ind3	11	C	G	G	G	C	C	A	A	C	A	G	G	T	G	T	C	G	G	A	C	T	G	C	A	G	G	T	G	T	C	C	A	T	T	G	C	C	G	A	T	T	C	T	C	A
E 2040::IRGC 67968-1::[IRIS 313-8914]	IRIS 313-8914	IRGC 125731	indx	11	C	G	G	G	C	C	A	A	C	A	G	G	T	G	T	C	G	G	A	C	T	G	C	A	G	G	T	G	T	C	C	A	T	T	G	C	C	G	A	T	T	C	T	C	A
PAI CHUEH CHIU LIU::IRGC 34259-1::[IRIS 313-9065]	IRIS 313-9065	IRGC 125865	ind1A	11	C	G	G	G	C	C	A	A	C	A	G	G	T	G	T	C	G	G	A	C	T	G	C	A	G	G	T	G	T	C	C	A	T	T	G	C	C	G	A	T	T	C	T	C	A
RTS 16::IRGC 8235-1::[IRIS 313-9429]	IRIS 313-9429	IRGC 126309	indx	11	C	G	G	G	C	C	A	A	C	A	G	G	T	G	T	C	G	G	A	C	T	G	C	A	G	G	T	G	T	C	C	A	T	T	G	C	C	G	A	T	T	C	T	C	A
SIGARDIS::IRGC 15555-1::[IRIS 313-9867]	IRIS 313-9867	IRGC 126088	ind1B	11	C	G	G	G	C	C	A	A	C	A	G	G	T	G	T	C	G	G	A	C	T	G	C	A	G	G	T	G	T	C	C	A	T	T	G	C	C	G	A	T	T	C	T	C	A
O. SATIVA::IRGC 17083-1::[IRIS 313-9882]	IRIS 313-9882	IRGC 125863	indx	11	C	G	G	G	C	C	A	A	C	A	G	G	T	G	T	C	G	G	A	C	T	G	C	A	G	G	T	G	T	C	C	A	T	T	G	C	C	G	A	T	T	C	T	C	A
MILYANG 30::IRGC 46977-1::[IRIS 313-9925]	IRIS 313-9925	IRGC 125839	ind1B	11	C	G	G	G	C	C	A	A	C	A	G	G	T	G	T	C	G	G	A	C	T	G	C	A	G	G	T	G	T	C	C	A	T	T	G	C	C	G	A	T	T	C	T	C	A
NOK KOD::IRGC 11784-1::[IRIS 313-10656]	IRIS 313-10656	IRGC 128407	subtrop	11	C	G	G	G	C	C	A	A	C	A	G	G	T	G	T	C	G	G	A	C	T	G	C	A	G	G	T	G	T	C	C	A	T	T	G	C	C	G	A	T	T	C	T	C	A
NON HAI::IRGC 29636-2::[IRIS 313-11078]	IRIS 313-11078	IRGC 132359	indx	11	C	G	G	G	C	C	A	A	C	A	G	G	T	G	T	C	G	G	A	C	T	G	C	A	G	G	T	G	T	C	C	A	T	T	G	C	C	G	A	T	T	C	T	C	A
SHITTA AMAN::IRGC 37596-1::[IRIS 313-11214]	IRIS 313-11214	IRGC 127799	aus	11	C	G	G	G	C	C	A	A	C	A	G	G	T	G	T	C	G	G	A	C	T	G	C	A	G	G	T	G	T	C	C	A	T	T	G	C	C	G	A	T	T	C	T	C	A
KOPANCSI KEREK::IRGC 9305-1::[IRIS 313-9811]	IRIS 313-9811	IRGC 125808	temp	11	C	G	G	G	C	C	A	A	C	A	G	G	T	G	T	C	G	G	A	C	T	G	C	A	G	G	T	G	T	C	C	A	T	T	G	C	C	G	A	T	T	C	T	C	A
JAO LEUANG::IRGC 65866-1::[IRIS 313-8679]	IRIS 313-8679	IRGC 126216	ind3	11	C	G	G	G	C	C	A	A	C	A	G	G	T	G	T	C	G	G	A	C	T	G	C	A	G	G	T	G	T	C	C	A	T	T	G	C	C	G	A	T	T	C	T	C	A
M 203::IRGC 76309-1::[IRIS 313-8444]	IRIS 313-8444	IRGC 126118	temp	9.5	C	G	G	G	C	C	A	A	C	A	G	G	T	G	T	C	G	G	A	C	T	G	C	A	G	G	T	G	T	C	C	A	T	T	G	C	C	G	A	T	T	C	T	C	A
IR 69502-6-SRN-3-UBN-1-B::IRGC 117290-1::[IRIS 313-10374]	IRIS 313-10374	IRGC 125979	indx	11	C	G	G	G	C	C	A	A	C	A	G	G	T	G	T	C	G	G	A	C	T	G	C	A	G	G	T	G	T	C	C	A	T	T	G	C	C	G	A	T	T	C	T	C	A
NAN ERH AI 5::IRGC 34255-1::[IRIS 313-11158]	IRIS 313-11158	IRGC 127644	ind1A	11	C	G	G	G	C	C	A	A	C	A	G	G	T	G	T	C	G	G	A	C	T	G	C	A	G	G	T	G	T	C	C	A	T	T	G	C	C	G	A	T	T	C	T	C	A
WAS 203-B-B-2-4-1::C1::[IRIS 313-7819]	IRIS 313-7819	IRGC 122289	ind1B	11	C	G	G	G	C	C	A	A	C	A	G	G	T	G	T	C	G	G	A	C	T	G	C	A	G	G	T	G	T	C	C	A	T	T	G	C	C	G	A	T	T	C	T	C	A
LU MAO ZHAN::IRGC 68159-1::[IRIS 313-8889]	IRIS 313-8889	IRGC 125829	indx	11	C	G	G	G	C	C	A	A	C	A	G	G	T	G	T	C	G	G	A	C	T	G	C	A	G	G	T	G	T	C	C	A	T	T	G	C	C	G	A	T	T	C	T	C	A
IR 68704-145-1-1-B::C1::[IRIS 313-7907]	IRIS 313-7907	IRGC 122108	trop	11	C	G	G	G	C	C	A	A	C	A	G	G	T	G	T	C	G	G	A	C	T	G	C	A	G	G	T	G	T	C	C	A	T	T	G	C	C	G	A	T	T	C	T	C	A
DAA MANSA::IRGC 67559-1::[IRIS 313-8514]	IRIS 313-8514	IRGC 126196	ind1B	11	C	G	G	G	C	C	A	A	C	A	G	G	T	G	T	C	G	G	A	C	T	G	C	A	G	G	T	G	T	C	C	A	T	T	G	C	C	G	A	T	T	C	T	C	A
MR77(SEBERANG )::[CX70]	CX70	IRGC 135994	indx	11	C	G	G	G	C	C	A	A	C	A	G	G	T	G	T	C	G	G	A	C	T	G	C	A	G	G	T	G	T	C	C	A	T	T	G	C	C	G	A	T	T	C	T	C	A
BAXIANG::[B008]	B008		temp	11	C	G	G	G	C	C	A	A	C	A	G	G	T	G	T	C	G	G	A	C	T	G	C	A	G	G	T	G	T	C	C	A	T	T	G	C	C	G	A	T	T	C	T	C	A
CT 9737-6-1-1-2-2P-M::IRGC 117330-1::[IRIS 313-10352]	IRIS 313-10352	IRGC 120922	indx	11	C	G	G	G	C	C	A	A	C	A	G	G	T	G	T	C	G	G	A	C	T	G	C	A	G	G	T	G	T	C	C	A	T	T	G	C	C	G	A	T	T	C	T	C	A
QI YUE ZHAN::IRGC 76722-1::[IRIS 313-11952]	IRIS 313-11952	IRGC 127756	ind1A	11	C	G	G	G	C	C	A	A	C	A	G	G	T	G	T	C	G	G	A	C	T	G	C	A	G	G	T	G	T	C	C	A	T	T	G	C	C	G	A	T	T	C	T	C	A
DOC PHUNG D 12::IRGC 10234-1::[IRIS 313-9131]	IRIS 313-9131	IRGC 135749	ind3	11	C	G	G	G	C	C	A	A	C	A	G	G	T	G	T	C	G	G	A	C	T	G	C	A	G	G	T	G	T	C	C	A	T	T	G	C	C	G	A	T	T	C	T	C	A
KORASISI::IRGC 5285-1::[IRIS 313-9505]	IRIS 313-9505	IRGC 125809	ind1A	11	C	G	G	G	C	C	A	A	C	A	G	G	T	G	T	C	G	G	A	C	T	G	C	A	G	G	T	G	T	C	C	A	T	T	G	C	C	G	A	T	T	C	T	C	A
AT354::[CX75]	CX75	IRGC 135832	indx	11	C	G	G	G	C	C	A	A	C	A	G	G	T	G	T	C	G	G	A	C	T	G	C	A	G	G	T	G	T	C	C	A	T	T	G	C	C	G	A	T	T	C	T	C	A
IR 10179-23-1-3::[B028]	B028	IRGC 135917	indx	12	C	G	G	G	C	C	A	A	C	A	G	G	T	G	T	C	G	G	A	C	T	G	C	A	G	G	T	G	T	C	C	A	T	T	G	C	C	G	A	T	T	C	T	C	A
IRGA 370-42-1-1F-C-1::IRGC 117343-1::[IRIS 313-10401]	IRIS 313-10401	IRGC 125989	ind1B	11	C	G	G	G	C	C	A	A	C	A	G	G	T	G	T	C	G	G	A	C	T	G	C	A	G	G	T	G	T	C	C	A	T	T	G	C	C	G	A	T	T	C	T	C	A
CHINA 1039 MUTANT (DWARF)::IRGC 24168-2::[IRIS 313-10932]	IRIS 313-10932	IRGC 128014	ind1A	12	C	G	G	G	C	C	A	A	C	A	G	G	T	G	T	C	G	G	A	C	T	G	C	A	G	G	T	G	T	C	C	A	T	T	G	C	C	G	A	T	T	C	T	C	A
LOC TRANG MUON::IRGC 73216-1::[IRIS 313-11894]	IRIS 313-11894	IRGC 128368	indx	11	C	G	G	G	C	C	A	A	C	A	G	G	T	G	T	C	G	G	A	C	T	G	C	A	G	G	T	G	T	C	C	A	T	T	G	C	C	G	A	T	T	C	T	C	A
KARUEL::IRGC 83792-1::[IRIS 313-12093]	IRIS 313-12093	IRGC 128334	indx	11	C	G	G	G	C	C	A	A	C	A	G	G	T	G	T	C	G	G	A	C	T	G	C	A	G	G	T	G	T	C	C	A	T	T	G	C	C	G	A	T	T	C	T	C	A
GOGOWIERIE::IRGC 14791-1::[IRIS 313-9851]	IRIS 313-9851	IRGC 126977	trop	11	C	G	G	G	C	C	A	A	C	A	G	G	T	G	T	C	G	G	A	C	T	G	C	A	G	G	T	G	T	C	C	A	T	T	G	C	C	G	A	T	T	C	T	C	A
SRAU KHSAI::IRGC 29896-2::[IRIS 313-11088]	IRIS 313-11088	IRGC 128170	ind3	11	C	G	G	G	C	C	A	A	C	A	G	G	T	G	T	C	G	G	A	C	T	G	C	A	G	G	T	G	T	C	C	A	T	T	G	C	C	G	A	T	T	C	T	C	A
DUMAI::[B029]	B029	IRGC 135885	ind1B	11	C	G	G	G	C	C	A	A	C	A	G	G	T	G	T	C	G	G	A	C	T	G	C	A	G	G	T	G	T	C	C	A	T	T	G	C	C	G	A	T	T	C	T	C	A
SANTIANNUO::[B044]	B044	IRGC 136042	indx	11	C	G	G	G	C	C	A	A	C	A	G	G	T	G	T	C	G	G	A	C	T	G	C	A	G	G	T	G	T	C	C	A	T	T	G	C	C	G	A	T	T	C	T	C	A
XIAOBAIMI::[B132]	B132		indx	8.5	C	G	G	G	C	C	A	A	C	A	G	G	T	G	T	C	G	G	A	C	T	G	C	A	G	G	C/T	A/G	T	C	C	A	T	T	G	C	C	G	A	T	T	C	T	C	A
AUGUSTO::GERVEX 1643-C1::[IRIS 313-8177]	IRIS 313-8177	IRGC 121971	japx	11	C	G	G	G	C	C	A	A	C	A	G	G	T	G	T	C	G	G	A	C	T	G	C	A	G	G	T	G	T	C	C	A	T	T	G	C	C	G	A	T	T	C	T	C	A
AGEPDAUJSECAN::IRGC 49361-1::[IRIS 313-9685]	IRIS 313-9685		indx	10.5	C	G	G	G	C	C	A	A	C	A	G	G	T	G	T	C	G	G	A	C	T	T/G	C			G	T	G	T	C	C	A	T	T	G	C	C	G	A	T	T	C	T	C	A
IRI 339::IRGC 46956-1::[IRIS 313-9922]	IRIS 313-9922	IRGC 125778	ind1B	11	C	G	G	G	C	C	A	A	C	A	G	G	T	G	T	C	G	G	A	C	T	G	C	A	G	G	T	G	T	C	C	A	T	T	G	C	C	G	A	T	T	C	T	C	A
ARC 10916::IRGC 12673-1::[IRIS 313-10676]	IRIS 313-10676	IRGC 127133	admix	12	C	G	G	G	C	C	A	A	C	A	G	G	T	G	T	C	G	G	A	C	T	G	C	A	G	G	T	G	T	C	C	A	T	T	G	C	C	G	A	T	T	C	T	C	A
WAS 63-22-5-9-10-1::C1::[IRIS 313-7832]	IRIS 313-7832	IRGC 122297	ind1B	11	C	G	G	G	C	C	A	A	C	A	G	G	T	G	T	C	G	G	A	C	T	G	C	A	G	G	T	G	T	C	C	A	T	T	G	C	C	G	A	T	T	C	T	C	A
ROJOFOTSY::IRGC 69402-1::[IRIS 313-9740]	IRIS 313-9740	IRGC 126083	ind2	11	C	G	G	G	C	C	A	A	C	A	G	G	T	G	T	C	G	G	A	C	T	G	C	A	G	G	T	G	T	C	C	A	T	T	G	C	C	G	A	T	T	C	T	C	A
QIYUEXIAN::[B082]	B082		indx	11	C	G	G	G	C	C	A	A	C	A	G	G	T	G	T	C	G	G	A	C	T	G	C	A	G	G	T	G	T	C	C	A	T	T	G	C	C	G	A	T	T	C	T	C	A
BG304::[CX76]	CX76	IRGC 135841	ind1B	11	C	G	G	G	C	C	A	A	C	A	G	G	T	G	T	C	G	G	A	C	T	G	C	A	G	G	T	G	T	C	C	A	T	T	G	C	C	G	A	T	T	C	T	C	A
DAMNOEUB THPOIL HING::IRGC 22856-2::[IRIS 313-10901]	IRIS 313-10901	IRGC 128027	ind3	11	C	G	G	G	C	C	A	A	C	A	G	G	T	G	T	C	G	G	A	C	T	G	C	A	G	G	T	G	T	C	C	A	T	T	G	C	C	G	A	T	T	C	T	C	A
PING SHAN TA TSWEN KU::IRGC 1563-1::[IRIS 313-9017]	IRIS 313-9017	IRGC 126988	indx	11	C	G	G	G	C	C	A	A	C	A	G	G	T	G	T	C	G	G	A	C	T	G	C	A	G	G	T	G	T	C	C	A	T	T	G	C	C	G	A	T	T	C	T	C	A
LX2007::[CX303]	CX303	IRGC 135976	indx	11	C	G	G	G	C	C	A	A	C	A	G	G	T	G	T	C	G	G	A	C	T	G	C	A	G	G	T	G	T	C	C	A	T	T	G	C	C	G	A	T	T	C	T	C	A
YUELIANGGU::[CX390]	CX390		indx	12	C	G	G	G	C	C	A	A	C	A	G	G	T	G	T	C	G	G	A	C	T	G	C	A	G	G	T	G	T	C	C	A	T		G	C	C	G	A	T	T	C	T	C	A
LUA CHUM::IRGC 16840-1::[IRIS 313-10751]	IRIS 313-10751	IRGC 127577	indx	11	C	G	G	G	C	C	A	A	C	A	G	G	T	G	T	C	G	G	A	C	T	G	C	A	G	G	T	G	T	C	C	A	T	T	G	C	C	G	A	T	T	C	T	C	A
INDEL::IRGC 17748-2::[IRIS 313-10775]	IRIS 313-10775	IRGC 128056	indx	10.5	C	G	G	G	C	C	A	A	C	A	G	G	T	G	T	C	G	G	A	C	T	G	C	A	G	G	T	G	T	C	C	A	T	T	G	C	C	G	A	T	T	C	T	C	A
SIBORAS::IRGC 18816-2::[IRIS 313-10814]	IRIS 313-10814	IRGC 128163	ind3	10	C	G	G	G	C	C	A	A	C	A	G	G	T	G	T	C	G	G	A	C	T	G	C	A	G	G	C/T	A/G	T	C	C	A	T	T	G	C	C	G	A	T	T	C	T	C	A
NEANG SAATH K 45::IRGC 23109-2::[IRIS 313-10912]	IRIS 313-10912		ind3	11	C	G	G	G	C	C	A	A	C	A		G	T	G	T	C	G	G	A	C	T	G	C	A	G	G	T	G	T	C	C	A	T	T	G	C	C	G	A	T	T	C	T	C	A
IR 9560-2-6-3::IRGC 40451-1::[IRIS 313-11250]	IRIS 313-11250	IRGC 127441	ind1B	11	C	G	G	G	C	C	A	A	C	A	G	G	T	G	T	C	G	G	A	C	T	G	C	A	G	G	T	G	T	C	C	A	T	T	G	C	C	G	A	T	T	C	T	C	A
BIE LEI::IRGC 76478-1::[IRIS 313-11947]	IRIS 313-11947	IRGC 127226	indx	11	C	G	G	G	C	C	A	A	C	A	G	G	T	G	T	C	G	G	A	C	T	G	C	A	G	G	T	G	T	C	C	A	T	T	G	C	C	G	A	T	T	C	T	C	A
ZAO LENG SHUI ZHAN::IRGC 79756-1::[IRIS 313-12012]	IRIS 313-12012	IRGC 127910	ind1A	11	C	G	G	G	C	C	A	A	C	A	G	G	T	G	T	C	G	G	A	C	T	G	C	A	G	G	T	G	T	C	C	A	T	T	G	C	C	G	A	T	T	C	T	C	A
AE NOUA::IRGC 89308-1::[IRIS 313-12185]	IRIS 313-12185	IRGC 127110	indx	11	C	G	G	G	C	C	A	A	C	A	G	G	T	G	T	C	G	G	A	C	T	G	C	A	G	G	T	G	T	C	C	A	T	T	G	C	C	G	A	T	T	C	T	C	A
SRI LANKA 1::[B013]	B013	IRGC 136049	indx	10.5	C	G	G	G	C	C	A	A	C	A	G	G	T	G	T	C	G	G	A	C	T	G	C	A	G	G	T	G	T	C	C	A	T	T	G	C	C	G	A	T	T	C	T	C	A
MOCHICA::IRGC 11070-1::[IRIS 313-9825]	IRIS 313-9825	IRGC 126159	ind2	11	C	G	G	G	C	C	A	A	C	A	G	G	T	G	T	C	G	G	A	C	T	G	C	A	G	G	T	G	T	C	C	A	T	T	G	C	C	G	A	T	T	C	T	C	A
DUDHSWAR 15-141::IRGC 37951-1::[IRIS 313-9397]	IRIS 313-9397		ind2	11	C	G	G	G	C	C	A	A	C	A	G	G	T	G	T	C	G	G	A	C	T	G	C	A	G	G	T	G	T	C	C	A	T	T	G	C	C	G	A	T	T	C	T	C	A
LEUANG DAM::IRGC 78267-1::[IRIS 313-8895]	IRIS 313-8895	IRGC 126156	ind3	11	C	G	G	G	C	C	A	A	C	A	G	G	T	G	T	C	G	G		C	T	G	C	A	G	G	T	G	T	C	C	A	T	T	G	C	C	G	A	T	T	C	T	C	A
ZHONGJIAN 100::[CX548]	CX548	IRGC 136094	indx	11	C	G	G	G	C	C	A	A	C	A	G	G	T	G	T	C	G	G	A	C	T	G	C	A	G	G	T	G	T	C	C	A	T	T	G	C	C	G	A	T	T	C	T	C	A
QITOUGU::[B093]	B093		ind1A	12	C	G	G	G	C	C	A	A	C	A	G	G	T	G	T	C	G	G	A	C	T	G	C	A	G	G	T	G	T	C	C	A	T	T	G	C	C	G	A	T	T	C	T	C	A
LUA DEN MUA::IRGC 7185-1::[IRIS 313-10556]	IRIS 313-10556	IRGC 135770	ind3	11	C	G	G	G	C	C	A	A	C	A	G	G	T	G	T	C	G	G	A	C	T	G	C	A	G	G	T	G	T	C	C	A	T	T	G	C	C	G	A	T	T	C	T	C	A
LEIHUOZHAN::[B259]	B259		ind1A	10.5	C	G	G	G	C	C	A	A	C	A	G	G	T	G	T	C	G	G	A	C	T	G	C	A	G	G	T	G	T	C	C	A	T	T	G	C	C	G	A	T	T	C	T	C	A
IR 5657-33-2::IRGC 77992-1::[IRIS 313-11978]	IRIS 313-11978	IRGC 127440	ind1B	11	C	G	G	G	C	C	A	A	C	A	G	G	T	G	T	C	G	G	A	C	T	G	C	A	G	G	T	G	T	C	C	A	T	T	G	C	C	G	A	T	T	C	T	C	A
NASAENG::IRGC 107818-1::[IRIS 313-12354]	IRIS 313-12354	IRGC 127649	indx	11	C	G	G	G	C	C	A	A	C	A	G	G	T	G	T	C	G	G	A	C	T	G	C	A	G	G	T	G	T	C	C	A	T	T	G	C	C	G	A	T	T	C	T	C	A
KALIA::IRGC 34699-1::[IRIS 313-9626]	IRIS 313-9626	IRGC 121005	aus	11	C	G	G	G	C	C	A	A	C	A	G	G	T	G	T	C	G	G	A	C	T	G	C	A	G	G	T	G	T	C	C	A	T	T	G	C	C	G	A	T	T	C	T	C	A
WANLIXIAN::[B130]	B130		ind1A	11	C	G	G	G	C	C	A	A	C	A	G	G	T	G	T	C	G	G	A	C	T	G	C	A	G	G	T	G	T	C	C	A	T	T	G	C	C	G	A	T	T	C	T	C	A
PULUT SELEMYAM::IRGC 71820-1::[IRIS 313-11849]	IRIS 313-11849	IRGC 128439	ind3	11	C	G	G	G	C	C	A	A	C	A	G	G	T	G	T	C	G	G	A	C	T	G	C	A	G	G	T	G	T	C	C	A	T	T	G	C	C	G	A	T	T	C	T	C	A
BR 5230-46-4::IRGC 117318-1::[IRIS 313-10341]	IRIS 313-10341	IRGC 121167	indx	11	C	G	G	G	C	C	A	A	C	A	G	G	T	G	T	C	G	G	A	C	T	G	C	A	G	G	T	G	T	C	C	A	T	T	G	C	C	G	A	T	T	C	T	C	A
ARC 10594::IRGC 12524-1::[IRIS 313-9609]	IRIS 313-9609	IRGC 125636	indx	11	C	G	G	G	C	C	A	A	C	A	G	G	T	G	T	C	G	G	A	C	T	G	C	A	G	G	T	G	T	C	C	A	T	T	G	C	C	G	A	T	T	C	T	C	A
DONG DU::IRGC 72037-1::[IRIS 313-11859]	IRIS 313-11859	IRGC 127339	ind1A	11	C	G	G	G	C	C	A	A	C	A	G	G	T	G	T	C	G	G	A	C	T	G	C	A	G	G	T	G	T	C	C	A	T	T	G	C	C	G	A	T	T	C	T	C	A
WAS 206-B-B-2-2-1::C1::[IRIS 313-7820]	IRIS 313-7820	IRGC 122290	ind1B	11	C	G	G	G	C	C	A	A	C	A	G	G	T	G	T	C	G	G	A	C	T	G	C	A	G	G	T	G	T	C	C	A	T	T	G	C	C	G	A	T	T	C	T	C	A
PADI HITAM::IRGC 43496-1::[IRIS 313-11312]	IRIS 313-11312	IRGC 135781	ind3	11	C	G	G	G	C	C	A	A	C	A	G	G	T	G	T	C	G	G	A	C	T	G	C	A	G	G	T	G	T	C	C	A	T	T	G	C	C	G	A	T	T	C	T	C	A
71011::[B181]	B181	IRGC 135816	ind1A	11	C	G	G	G	C	C	A	A	C	A	G	G	T	G	T	C	G	G	A	C	T	G	C	A	G	G	T	G	T	C	C	A	T	T	G	C	C	G	A	T	T	C	T	C	A
HEGAR MANAH::IRGC 17733-1::[IRIS 313-10774]	IRIS 313-10774	IRGC 127404	indx	11	C	G	G	G	C	C	A	A	C	A	G	G	T	G	T	C	G	G	A	C	T	G	C	A	G	G	T	G	T	C	C	A	T	T	G	C	C	G	A	T	T	C	T	C	A
ARC 15480::IRGC 53799-1::[IRIS 313-11490]	IRIS 313-11490	IRGC 127160	indx	11	C	G	G	G	C	C	A	A	C	A	G	G	T	G	T	C	G	G	A	C	T	G	C	A	G	G	T	G	T	C	C	A	T	T	G	C	C	G	A	T	T	C	T	C	A
WAS 174-B-3-5::C1::[IRIS 313-7809]	IRIS 313-7809	IRGC 122286	indx	11	C	G	G	G	C	C	A	A	C	A	G	G	T	G	T	C	G	G	A	C	T	G	C	A	G	G	T	G	T	C	C	A	T	T	G	C	C	G	A	T	T	C	T	C	A
TRANG LUA::IRGC 16781-1::[IRIS 313-10750]	IRIS 313-10750	IRGC 135804	ind3	11	C		G	G	C	C	A	A	C	A	G	G	T	G	T	C	G	G	A	C	T	G	C	A	G	G	T	G	T	C	C	A	T	T	G	C	C	G	A	T	T	C	T	C
CHENGDUAI 3::[B114]	B114		ind1A	11	C	G	G	G	C	C	A	A	C	A	G	G	T	G	T	C	G	G	A	C	T	G	C	A	G	G	T	G	T	C	C	A	T	T	G	C	C	G	A	T	T	C	T	C	A
PADINTHUMA::IRGC 70762-2::[IRIS 313-11819]	IRIS 313-11819	IRGC 132362	ind3	11	C	G	G	G	C	C	A	A	C	A	G	G	T	G	T	C	G	G	A	C	T	G	C	A	G	G	T	G	T	C	C	A	T	T	G	C	C	G	A	T	T	C	T	C	A
THIERNO BANDE::IRGC 16009-1::[IRIS 313-9160]	IRIS 313-9160	IRGC 125922	ind3	11	C	G	G	G	C	C	A	A	C	A	G	G	T	G	T	C	G	G	A	C	T	G	C	A	G	G	T	G	T	C	C	A	T	T	G	C	C	G	A	T	T	C	T	C	A
JINNANTE 43B::[B151]	B151		ind1A	11.5	C	G	G	G	C	C	A	A	C	A	G	G	T	G	T	C	G	G	A	C	T	G	C	A	G	G	T	G	T	C	C	A	T	T	G	C	C	G	A	T	T	C	T	C	A
KAUK PAHLING::IRGC 95823-2::[IRIS 313-12266]	IRIS 313-12266	IRGC 128520	subtrop	11	C	G	G	G	C	C	A	A	C	A	G	G	T	G	T	C	G	G	A	C	T	G	C	A	G	G	T	G	T	C	C	A	T	T	G	C	C	G	A	T	T	C	T	C	A
PEI C122::[B140]	B140		ind1A	11	C	G	G	G	C	C	A	A	C	A	G	G	T	G	T	C	G	G	A	C	T	G	C	A	G	G	T	G	T	C	C	A	T	T	G	C	C	G	A	T	T	C	T	C	A
C.MEDIO 7::[B193]	B193	IRGC 135869	indx	11	C	G	G	G	C	C	A	A	C	A	G	G	T	G	T	C	G	G	A	C	T	G	C	A	G	G	T	G	T	C	C	A	T	T	G	C	C	G	A	T	T	C	T	C	A
LIMING B::[B154]	B154		temp	10	C	G	G	G	C	C	A	A	C	A	G	G	T	G	T	C	G	G	A	C	T	T/G	C	A	G	G	T	G	T	C	C	A	T	T	G	C	C	G	A	T	T	C	T	C	A
QUERO ASSAN::IRGC 28860-1::[IRIS 313-9898]	IRIS 313-9898	IRGC 125880	ind3	11	C	G	G	G	C	C	A	A	C	A	G	G	T	G	T	C	G	G	A	C	T	G	C	A	G	G	T	G	T	C	C	A	T	T	G	C	C	G	A	T	T	C	T	C	A
MAE YEU::IRGC 64509-1::[IRIS 313-9575]	IRIS 313-9575	IRGC 131916	ind3	11	C	G	G	G	C	C	A	A	C	A	G	G	T	G	T	C	G	G	A	C	T	G	C	A	G	G	T	G	T	C	C	A	T	T	G	C	C	G	A	T	T	C	T	C	A
SING SAI::IRGC 71442-2::[IRIS 313-11845]	IRIS 313-11845	IRGC 132369	subtrop	11	C	G	G	G	C	C	A	A	C	A	G	G	T	G	T	C	G	G	A	C	T	G	C	A	G	G	T	G	T	C	C	A	T	T	G	C	C	G	A	T	T	C	T	C	A
CHENGNONGSHUIJING::[B201]	B201		ind1B	11	C	G	G	G	C	C	A	A	C	A	G	G	T	G	T	C	G	G	A	C	T	G	C	A	G	G	T	G	T	C	C	A	T	T	G	C	C	G	A	T	T	C	T	C	A
CX424::[CX424]	CX424		ind1B	11	C	G	G	G	C	C	A	A	C	A	G	G	T	G	T	C	G	G	A	C	T	G	C	A	G	G	T	G	T	C	C	A	T	T	G	C	C	G	A	T	T	C	T	C	A
MILYANG 77::IRGC 69340-1::[IRIS 313-10040]	IRIS 313-10040	IRGC 125840	ind1B	11	C	G	G	G	C	C	A	A	C	A	G	G	T	G	T	C	G	G	A	C	T	G	C	A	G	G	T	G	T	C	C	A	T	T	G	C	C	G	A	T	T	C	T	C	A
JAROM EMAS::IRGC 14272-1::[IRIS 313-10702]	IRIS 313-10702		ind3	11	C	G	G	G	C	C	A	A	C	A	G	G	T	G	T	C	G	G	A	C	T	G	C	A	G	G	T	G	T	C	C	A	T	T	G	C	C	G	A	T	T	C	T	C	A
ZACATEPEC::IRGC 16901-2::[IRIS 313-10753]	IRIS 313-10753	IRGC 128205	ind1B	11	C	G	G	G	C	C	A	A	C	A	G	G	T	G	T	C	G	G	A	C	T	G	C	A	G	G	T	G	T	C	C	A	T	T	G	C	C	G	A	T	T	C	T	C	A
ARC 12493::IRGC 22098-1::[IRIS 313-10884]	IRIS 313-10884	IRGC 128225	subtrop	11	C	G	G	G	C	C	A	A	C	A	G	G	T	G	T	C	G	G	A	C	T	G	C	A	G	G	T	G	T	C	C	A	T	T	G	C	C	G	A	T	T	C	T	C	A
LAANG::IRGC 79258-1::[IRIS 313-12000]	IRIS 313-12000	IRGC 135569	ind3	11	C	G	G	G	C	C	A	A	C	A	G	G	T	G	T	C	G	G	A	C	T	G	C	A	G	G	T	G	T	C	C	A	T	T	G	C	C	G	A	T	T	C	T	C	A
IR 4683-54-2::IRGC 72992-1::[IRIS 313-11886]	IRIS 313-11886	IRGC 127439	ind1B	11	C	G	G	G	C	C	A	A	C	A	G	G	T	G	T	C	G	G	A	C	T	G	C	A	G	G	T	G	T	C	C	A	T	T	G	C	C	G	A	T	T	C	T	C	A
E ZI 96::IRGC 70188-1::[IRIS 313-8859]	IRIS 313-8859	IRGC 125738	ind1A	8	C	G	G	G	C	C	A	A	C	A	G	G	T	G	T	C	G	G	A	C	T	G	C	A	G	G	T	G	T	C	C	A	T	T	G	C	C	G					T	C	A
SSANGDUJO::IRGC 55632-1::[IRIS 313-9976]	IRIS 313-9976	IRGC 125906	ind1A	11	C	G	G	G	C	C	A	A	C	A	G	G	T	G	T	C	G	G	A	C	T	G	C	A	G	G	T	G	T	C	C	A	T	T	G	C	C	G	A	T	T	C	T	C	A
PANKHIRAJ::IRGC 24139-1::[IRIS 313-10930]	IRIS 313-10930	IRGC 127714	aus	11	C	G	G	G	C	C	A	A	C	A	G	G	T	G	T	C	G	G	A	C	T	G	C	A	G	G	T	G	T	C	C	A	T	T	G	C	C	G	A	T	T	C	T	C	A
AMOL3(SANA)::[CX26]	CX26		ind1B	11	C	G	G	G	C	C	A	A	C	A	G	G	T	G	T	C	G	G	A	C	T	G	C	A	G	G	T	G	T	C	C	A	T	T	G	C	C	G	A	T	T	C	T	C	A
PURTOK (MALAGKIT)::IRGC 44707-2::[IRIS 313-11343]	IRIS 313-11343	IRGC 132263	ind3	11	C	G	G	G	C	C	A	A	C	A	G	G	T	G	T	C	G	G	A	C	T	G	C	A	G	G	T	G	T	C	C	A	T	T	G	C	C	G	A	T	T	C	T	C	A
PADISENEMOK::[CX263]	CX263	IRGC 136018	indx	11	C	G	G	G	C	C	A	A	C	A	G	G	T	G	T	C	G	G	A	C	T	G	C	A	G	G	T	G	T	C	C	A	T	T	G	C	C	G	A	T	T	C	T	C	A
LEUANG MAI::IRGC 66019-2::[IRIS 313-11710]	IRIS 313-11710	IRGC 134992	ind3	11	C	G	G	G	C	C	A	A	C	A	G	G	T	G	T	C	G	G	A	C	T	G	C	A	G	G	T	G	T	C	C	A	T	T	G	C	C	G	A	T	T	C	T	C	A
JINEIYADAO::[B020]	B020	IRGC 135958	admix	11	C	G	G	G	C	C	A	A	C	A	G	G	T	G	T	C	G	G	A	C	T	G	C	A	G	G	T	G	T	C	C	A	T	T	G	C	C	G	A	T	T	C	T	C	A
YZX2::[CX363]	CX363		indx	10.5	C	G	G	G	C	C	A	A	C	A	G	G	T	G	T	C	G	G	A	C	T	G	C	A	G	G	C/T	G	T	C	C	A	T	T	G	C	C	G	A	T	T	C	T	C	A
GIZA14::[CX111]	CX111	IRGC 135894	trop	11	C	G	G	G	C	C	A	A	C	A	G	G	T	G	T	C	G	G	A	C	T	G	C	A	G	G	T	G	T	C	C	A	T	T	G	C	C	G	A	T	T	C	T	C	A
SD 120 SELN (CI 12320)::IRGC 1667-1::[IRIS 313-8745]	IRIS 313-8745	IRGC 126087	trop	11	C	G	G	G	C	C	A	A	C	A	G	G	T	G	T	C	G	G	A	C	T	G	C	A	G	G	T	G	T	C	C	A	T	T	G	C	C	G	A	T	T	C	T	C	A
AIMAKANG::[B115]	B115		ind1A	11	C	G	G	G	C	C	A	A	C	A	G	G	T	G	T	C	G	G	A	C	T	G	C	A	G	G	T	G	T	C	C	A	T	T	G	C	C	G	A	T	T	C	T	C	A
ASE BAKKA LOMPO::IRGC 26988-2::[IRIS 313-10995]	IRIS 313-10995	IRGC 127976	ind3	11	C	G	G	G	C	C	A	A	C	A	G	G	T	G	T	C	G	G	A	C	T	G	C	A	G	G	T	G	T	C	C	A	T	T	G	C	C	G	A	T	T	C	T	C	A
A 69-1::IRGC 55305-1::[IRIS 313-11510]	IRIS 313-11510	IRGC 127102	indx	11	C	G	G	G	C	C	A	A	C	A	G	G	T	G	T	C	G	G	A	C	T	G	C	A	G	G	T	G	T	C	C	A	T	T	G	C	C	G	A	T	T	C	T	C	A
ARC 10799::IRGC 12631-1::[IRIS 313-9313]	IRIS 313-9313	IRGC 125638	indx	12	C	G	G	G	C	C	A	A	C	A	G	G	T	G	T	C	G	G	A	C	T	G	C	A	G	G	T	G	T	C	C	A	T	T	G	C	C	G	A	T	T	C	T	C	A
HEIBIAO::[B001]	B001	IRGC 135900	temp	10.5	C	G	G	G	C	C	A	A	C	A	G	G	T	G	T	C	G	G	A	C	T	T/G	C	A	G	G	T	G	T	C	C	A	T	T	G	C	C	G	A	T	T	C	T	C	A
DAWANNUO::[B107]	B107		indx	11	C	G	G	G	C	C	A	A	C	A	G	G	T	G	T	C	G	G	A	C	T	G	C	A	G	G	T	G	T	C	C	A	T	T	G	C	C	G	A	T	T	C	T	C	A
BASMATI::[CX60]	CX60	IRGC 117652	ind1B	10	C	G	G	G	C	C	A	A	C	A	G	G	T	G	T	C	G	G	A	C	T	T/G	C	A	G	G	C/T	G	T	C	C	A	T	T	G	C	C	G	A	T	T	C	T	C	A
CUNSANLI::[B205]	B205		japx	11	C	G	G	G	C	C	A	A	C	A	G	G	T	G	T	C	G	G	A	C	T	G	C	A	G	G	T	G	T	C	C	A	T	T	G	C	C	G	A	T	T	C	T	C	A
GENG 87-304::[B124]	B124		temp	11	C	G	G	G	C	C	A	A	C	A	G	G	T	G	T	C	G	G	A	C	T	G	C	A	G	G	T	G	T	C	C	A	T	T	G	C	C	G	A	T	T	C	T	C	A
76--1::[B143]	B143		temp	11	C	G	G	G	C	C	A	A	C	A	G	G	T	G	T	C	G	G	A	C	T	G	C	A	G	G	T	G	T	C	C	A	T	T	G	C	C	G	A	T	T	C	T	C	A
JINBAOYIN::[B075]	B075		indx	8.5	C	G	G	G	C	C	A	A	C	A	G	G	T	G	T	C	G	G	A	C	T	T/G	C	A	G	G	C/T	G	T	C	C	A	T	T	G	C	C	G	A	T	T	C	T	C	A
GU 154::[B138]	B138		indx	11	C	G	G	G	C	C	A	A	C		G	G	T	G	T	C	G	G	A	C	T	G	C	A	G	G	T	G	T	C	C	A	T	T	G	C	C	G	A	T	T	C	T	C	A
ZHUZHEN B::[B248]	B248		ind1A	11	C	G	G	G	C	C	A	A	C	A	G	G	T	G	T	C	G	G	A	C	T	G	C	A	G	G	T	G	T	C	C	A	T	T	G	C	C	G	A	T	T	C	T	C	A
BARUM::IRGC 79108-1::[IRIS 313-11997]	IRIS 313-11997	IRGC 127213	ind3	11	C	G	G	G	C	C	A	A	C	A	G	G	T	G	T	C	G	G	A	C	T	G	C	A	G	G	T	G	T	C	C	A	T	T	G	C	C	G	A	T	T	C	T	C	A
KHAO DAWK MALI 105::IRGC 27748-2::[IRIS 313-8253]	IRIS 313-8253	IRGC 121235	ind3	11	C	G	G	G	C	C	A	A	C	A	G	G	T	G	T	C	G	G	A	C	T	G	C	A	G	G	T	G	T	C	C	A	T	T	G	C	C	G	A	T	T	C	T	C	A
KERITING TINGGI::IRGC 19972-1::[IRIS 313-9329]	IRIS 313-9329	IRGC 131941	ind3	11	C	G	G	G	C	C	A	A	C	A	G	G	T	G	T	C	G	G	A	C	T	G	C	A	G	G	T	G	T	C	C	A	T	T	G	C	C	G	A	T	T	C	T	C	A
TJERE MANGGA::IRGC 19116-2::[IRIS 313-10820]	IRIS 313-10820	IRGC 128189	ind3	11	C	G	G	G	C	C	A	A	C	A	G	G	T	G	T	C	G	G	A	C	T	G	C	A	G	G	T	G	T	C	C	A	T	T	G	C	C	G	A	T	T	C	T	C	A
SHAN KAUK HNYIN::IRGC 81656-1::[IRIS 313-12050]	IRIS 313-12050	IRGC 128468	indx	11	C	G	G	G	C	C	A	A	C	A	G	G	T	G	T	C	G	G	A	C	T	G	C	A	G	G	T	G	T	C	C	A	T	T	G	C	C	G	A	T	T	C	T	C	A
PUSA(BASMATI 1)::[CX46]	CX46	IRGC 136026	admix	11	C	G	G	G	C	C	A	A	C	A	G	G		G	T	C	G	G	A	C	T	G	C	A	G	G	T	G	T	C	C	A	T	T	G	C	C	G	A	T	T	C	T	C	A
K 1074::IRGC 55017-1::[IRIS 313-11505]	IRIS 313-11505	IRGC 127469	ind2	11	C	G	G	G	C	C	A	A	C	A	G	G	T	G	T	C	G	G	A	C	T	G	C	A	G	G	T	G	T	C	C	A	T	T	G	C	C	G	A	T	T	C	T	C	A
SAN ZHAO QI::IRGC 72289-1::[IRIS 313-11871]	IRIS 313-11871	IRGC 127787	ind1A	11	C	G	G	G	C	C	A	A	C	A	G	G	T	G	T	C	G	G	A	C	T	G	C	A	G	G	T	G	T	C	C	A	T	T	G	C	C	G	A	T	T	C	T	C	A
MOUI SAMBA::IRGC 75751-1::[IRIS 313-11941]	IRIS 313-11941	IRGC 128394	ind1B	11	C	G	G	G	C	C	A	A	C	A	G	G	T	G	T	C	G	G	A	C	T	G	C	A	G	G	T	G	T	C	C	A	T	T	G	C	C	G	A	T	T	C	T	C	A
BAZAIL::IRGC 27526-1::[IRIS 313-8717]	IRIS 313-8717	IRGC 126184	indx	11	C	G	G	G	C	C	A	A	C	A	G	G	T	G	T	C	G	G	A	C	T	G	C	A	G	G	T	G	T	C	C	A	T	T	G	C	C	G	A	T	T	C	T	C	A
SIMET 2::IRGC 25734-1::[IRIS 313-8833]	IRIS 313-8833	IRGC 126142	ind3	11	C	G	G	G	C	C	A	A	C	A	G	G	T	G	T	C	G	G	A	C	T	G	C	A	G	G	T	G	T	C	C	A	T	T	G	C	C	G	A	T	T	C	T	C	A
RP 9-4::IRGC 39735-1::[IRIS 313-9566]	IRIS 313-9566	IRGC 126004	ind1B	11	C	G	G	G	C	C	A	A	C	A	G	G	T	G	T	C	G	G	A	C	T	G	C	A	G	G	T	G	T	C	C	A	T	T	G	C	C	G	A	T	T	C	T	C	A
Y 115::IRGC 30856-2::[IRIS 313-11101]	IRIS 313-11101	IRGC 128202	indx	11	C	G	G	G	C	C	A	A	C	A	G	G	T	G	T	C	G	G	A	C	T	G	C	A	G	G	T	G	T	C	C	A	T	T	G	C	C	G	A	T	T	C	T	C	A
GENE::IRGC 67434-1::[IRIS 313-8383]	IRIS 313-8383	IRGC 125964	indx	11	C	G	G	G	C	C	A	A	C	A	G	G	T	G	T	C	G	G	A	C	T	G	C	A	G	G	T	G	T	C	C	A	T	T	G	C	C	G	A	T	T	C	T	C	A
ANG KANG K P::IRGC 22716-2::[IRIS 313-10898]	IRIS 313-10898	IRGC 127928	ind3	11	C	G	G	G	C	C	A	A	C	A	G	G	T	G	T	C	G	G	A	C	T	G	C	A	G	G	T	G	T	C	C	A	T	T	G	C	C	G	A	T	T	C	T	C	A
BAOXUAN 21 B::[CX328]	CX328		ind1A	11	C	G	G	G	C	C	A	A	C	A	G	G	T	G	T	C	G	G	A	C	T	G	C	A	G	G	T	G	T	C	C	A	T	T	G	C	C	G	A	T	T	C	T	C	A
HAN NUO::IRGC 59591-1::[IRIS 313-10164]	IRIS 313-10164	IRGC 125757	temp	10	C	G	G	G	C	C	A	A	C	A	G	G	T	G	T	C	G	G	A	C	T		C	A	G	G	T	G	T	C	C	A	T	T	G	C	C	G	A	T	T	C	T	C	A
UPR 1201-1-20-1::IRGC 117357-1::[IRIS 313-10417]	IRIS 313-10417	IRGC 126012	ind1B	11	C	G	G	G	C	C	A	A	C	A	G	G	T	G	T	C	G	G	A	C	T	G	C	A	G	G	T	G	T	C	C	A	T	T	G	C	C	G	A	T	T	C	T	C	A
PREAH SIHANOUK::IRGC 11328-2::[IRIS 313-10648]	IRIS 313-10648	IRGC 132364	ind3	11	C	G	G	G	C	C	A	A	C	A	G	G	T	G	T	C	G	G	A	C	T	G	C	A	G	G	T	G	T	C	C	A	T	T	G	C	C	G	A	T	T	C	T	C	A
MARECH S V R::IRGC 23011-2::[IRIS 313-10907]	IRIS 313-10907	IRGC 128105	ind3	11	C	G	G	G	C	C	A	A	C	A	G	G	T	G	T	C	G	G	A	C	T	G	C	A	G	G	T	G	T	C	C	A	T	T	G	C	C	G	A	T	T	C	T	C	A
JENDA ABANG::IRGC 25413-2::[IRIS 313-10951]	IRIS 313-10951	IRGC 128062	ind3	11	C	G	G	G	C	C	A	A	C	A	G	G	T	G	T	C	G	G	A	C	T	G	C	A	G	G	T	G	T	C	C	A	T	T	G	C	C	G	A	T	T	C	T	C	A
HURANG ARISO LUTA::IRGC 26055-1::[IRIS 313-10966]	IRIS 313-10966	IRGC 127424	indx	11	C	G	G	G	C	C	A	A	C	A		G	T	G	T	C	G	G	A	C	T	G	C	A	G	G	T	G	T	C	C	A	T	T	G	C	C	G	A	T	T	C	T	C	A
PORANG::IRGC 27577-1::[IRIS 313-11019]	IRIS 313-11019	IRGC 128436	aus	11	C	G	G	G	C	C	A	A	C	A	G	G	T	G	T	C	G	G	A	C	T	G	C	A	G	G	T	G	T	C	C	A	T	T	G	C	C	G	A	T	T	C	T	C	A
KABIN::IRGC 29752-1::[IRIS 313-11084]	IRIS 313-11084		ind3	11	C	G	G	G	C	C	A	A	C	A	G	G	T	G	T	C	G	G	A	C	T	G	C	A	G	G	T	G	T	C	C	A	T	T	G	C	C	G	A	T	T	C	T	C	A
BAK TULSI::IRGC 34831-1::[IRIS 313-11164]	IRIS 313-11164	IRGC 127205	aus	11	C	G	G	G	C	C	A	A	C	A	G	G	T	G	T	C	G	G	A	C	T	G	C	A	G	G	T	G	T	C	C	A	T	T	G	C	C	G	A	T	T	C	T	C	A
SPR 7284-57-5::IRGC 38649-1::[IRIS 313-11233]	IRIS 313-11233	IRGC 127823	ind1B	11	C	G	G	G	C	C	A	A	C	A	G	G	T	G	T	C	G	G	A	C	T	G	C	A	G	G	T	G	T	C	C	A	T	T	G	C	C	G	A	T	T	C	T	C	A
ALAMINOS::IRGC 44268-2::[IRIS 313-11330]	IRIS 313-11330	IRGC 132236	ind3	11	C	G	G	G	C	C	A	A	C	A	G	G	T	G	T	C	G	G	A	C	T	G	C	A	G	G	T	G	T	C	C	A	T	T	G	C	C	G	A	T	T	C	T	C	A
PODAO::IRGC 44701-1::[IRIS 313-11342]	IRIS 313-11342		indx	11	C	G	G	G	C	C	A	A	C	A	G	G	T	G	T	C	G	G	A	C	T	G	C	A	G	G	T	G	T	C	C	A	T	T	G	C	C	G	A	T	T	C	T	C	A
CHIEM TONG NHAT 1::IRGC 47496-1::[IRIS 313-11384]	IRIS 313-11384	IRGC 127275	indx	11	C	G	G	G	C	C	A	A	C	A	G	G	T	G	T	C	G	G	A	C	T	G	C	A	G	G	T	G	T	C	C	A	T	T	G	C	C	G	A	T	T	C	T	C	A
13946 (GUANG QIU 15)::IRGC 50320-1::[IRIS 313-11422]	IRIS 313-11422	IRGC 127095	ind1A	11	C	G	G	G	C	C	A	A	C	A	G	G	T	G	T	C	G	G	A	C	T	G	C	A	G	G	T	G	T	C	C	A	T	T	G	C	C	G	A	T	T	C	T	C	A
TIAN DAO DAO::IRGC 72837-1::[IRIS 313-11884]	IRIS 313-11884	IRGC 127857	ind1A	11	C	G	G	G	C	C	A	A	C	A	G	G	T	G	T	C	G	G	A	C	T	G	C	A	G	G	T	G	T	C	C	A	T	T	G	C	C	G	A	T	T	C	T	C	A
PAYO TINGGI::IRGC 73778-1::[IRIS 313-11905]	IRIS 313-11905	IRGC 132414	ind3	11	C	G	G	G	C	C	A	A	C	A	G	G	T	G	T	C	G	G	A	C	T	G	C	A	G	G	T	G	T	C	C	A	T	T	G	C	C	G	A	T	T	C	T	C	A
JHINUWA DHAN::IRGC 88545-1::[IRIS 313-12180]	IRIS 313-12180	IRGC 128323	indx	12	C	G	G	G	C	C	A	A	C	A	G	G	T	G	T	C	G	G	A	C	T	G	C	A	G	G	T	G	T	C	C	A	T	T		C	C	G	A	T	T	C	T	C	A
SAHEL 108::C1::[IRIS 313-7766]	IRIS 313-7766	IRGC 122232	ind1B	11	C	G	G	G	C	C	A	A	C	A	G	G	T	G	T	C	G	G	A	C	T	G	C	A	G	G	T	G	T	C	C	A	T	T	G	C	C	G	A	T	T	C	T	C	A
TAPANG::IRGC 13361-1::[IRIS 313-8781]	IRIS 313-8781		ind3	11	C	G	G	G	C	C	A	A	C	A	G	G	T	G	T	C	G	G	A	C	T	G	C	A	G	G	T	G	T	C	C	A	T	T	G	C	C	G	A	T	T	C	T	C	A
TAKAO MOCHI::IRGC 2564-1::[IRIS 313-9081]	IRIS 313-9081	IRGC 125915	temp	11	C	G	G	G	C	C	A	A	C	A	G	G	T	G	T	C	G	G	A	C	T	G	C	A	G	G	T	G	T	C	C	A	T	T	G	C	C	G	A	T	T	C	T	C	A
JANDA LAOR::IRGC 48552-1::[IRIS 313-9251]	IRIS 313-9251	IRGC 126980	ind3	11	C	G	G	G	C	C	A	A	C	A	G	G	T	G	T	C	G	G	A	C	T	G	C	A	G	G	T	G	T	C	C	A	T	T	G	C	C	G	A	T	T	C	T	C	A
ARC 15088::IRGC 41934-1::[IRIS 313-9593]	IRIS 313-9593	IRGC 125651	indx	11	C	G	G	G	C	C	A	A	C	A	G	G	T	G	T	C	G	G	A	C	T	G	C	A	G	G	T	G	T	C	C	A	T	T	G	C	C	G	A	T	T	C	T	C	A
CRILLO LA FRIA::IRGC 10793-1::[IRIS 313-9822]	IRIS 313-9822	IRGC 125716	ind1A	11	C	G	G	G	C	C	A	A	C	A	G	G	T	G	T	C	G	G	A	C	T	G	C	A	G	G	T	G	T	C	C	A	T	T	G	C	C	G	A	T	T	C	T	C	A
ARAURE 1::IRGC 116956-1::[IRIS 313-10289]	IRIS 313-10289	IRGC 125950	ind1B	11	C	G	G	G	C	C	A	A	C	A	G	G	T	G	T	C	G	G	A	C	T	G	C	A	G	G	T	G	T	C	C	A	T	T	G	C	C	G	A	T	T	C	T	C	A
IRGA 411-1-6-1F-A::IRGC 117344-1::[IRIS 313-10402]	IRIS 313-10402	IRGC 125990	ind1B	11	C	G	G	G	C	C	A	A	C	A	G	G	T	G	T	C	G	G	A	C	T	G	C	A	G	G	T	G	T	C	C	A	T	T	G	C	C	G	A	T	T	C	T	C	A
TAM::IRGC 99161-1::[IRIS 313-12311]	IRIS 313-12311	IRGC 128481	subtrop	11	C	G	G	G	C	C	A	A		A	G	G	T	G	T	C	G	G	A	C	T	G	C	A	G	G	T	G	T	C	C	A	T	T	G	C	C	G	A	T	T	C	T	C	A
KOYRA::IRGC 77267-1::[IRIS 313-8283]	IRIS 313-8283	IRGC 121026	aus	11	C	G	G	G	C	C	A	A	C	A	G	G	T	G	T	C	G	G	A	C	T	G	C	A	G	G	T	G	T	C	C	A	T	T	G	C	C	G	A	T	T	C	T	C	A
REMOL::IRGC 18624-1::[IRIS 313-8744]	IRIS 313-8744	IRGC 126266	ind3	11	C	G	G	G	C	C	A	A	C	A	G	G	T	G	T	C	G	G	A	C	T	G	C	A	G	G	T	G	T	C	C	A	T	T	G	C	C	G	A	T	T	C	T	C	A
PAOTSUPAGAIAHON::IRGC 17072-1::[IRIS 313-8873]	IRIS 313-8873	IRGC 125867	admix	11	C	G	G	G	C	C	A	A	C	A	G	G	T	G	T	C	G	G	A	C	T	G	C	A	G	G	T	G	T	C	C	A	T	T	G	C	C	G	A	T	T	C	T	C	A
CHITRAKALI::IRGC 49524-2::[IRIS 313-11408]	IRIS 313-11408	IRGC 128016	ind2	11	C	G	G	G	C	C	A	A	C	A	G	G	T	G	T	C	G	G	A	C	T	G	C	A	G	G	T	G	T	C	C	A	T	T	G	C	C	G	A	T	T	C	T	C	A
ATT CHHMOUS::IRGC 87030-1::[IRIS 313-12142]	IRIS 313-12142	IRGC 127177	ind3	11	C	G	G	G	C	C	A	A	C	A	G	G	T	G	T	C	G	G	A	C	T	G	C	A	G	G	T	G	T	C	C	A	T	T	G	C	C	G	A	T	T	C	T	C	A
XIA ZHI BAI::IRGC 53437-1::[IRIS 313-9111]	IRIS 313-9111	IRGC 125940	ind1A	11	C	G	G	G	C	C	A	A	C	A	G	G	T	G	T	C	G	G	A	C	T	G	C	A	G	G	T	G	T	C	C	A	T	T	G	C	C	G	A	T	T	C	T	C	A
NANE::IRGC 25035-1::[IRIS 313-10947]	IRIS 313-10947	IRGC 127643	ind3	11	C	G	G	G	C	C	A	A	C	A	G	G	T	G	T	C	G	G	A		T	G	C	A	G	G	T	G	T	C	C	A	T	T	G	C	C	G	A	T	T	C	T	C	A
TIE ZHONG::IRGC 72321-1::[IRIS 313-11872]	IRIS 313-11872	IRGC 127858	ind1A	11	C	G	G	G	C	C	A	A	C	A	G	G	T	G	T	C	G	G	A	C	T	G	C	A	G	G	T	G	T	C	C	A	T	T	G	C	C	G	A	T	T	C	T	C	A
WP 36::IRGC 55278-1::[IRIS 313-8732]	IRIS 313-8732	IRGC 126092	ind1B	11	C	G	G	G	C	C	A	A	C	A	G	G	T	G	T	C	G	G	A	C	T	G	C	A	G	G	T	G	T	C	C	A	T	T	G	C	C	G	A	T	T	C	T	C	A
RPW 9-4 (SS 1)::IRGC 50690-1::[IRIS 313-9522]	IRIS 313-9522	IRGC 126084	indx	11	C	G	G	G	C	C	A	A	C	A	G	G	T	G	T	C	G	G	A	C	T	G	C	A	G	G	T	G	T	C	C	A	T	T	G	C	C	G	A	T	T	C	T	C	A
LUBANG PUTI::IRGC 5429-1::[IRIS 313-10513]	IRIS 313-10513	IRGC 127579	indx	11	C	G	G	G	C	C	A	A	C	A	G	G	T	G	T	C	G	G	A	C	T	G	C	A	G	G	T	G	T	C	C	A	T	T	G	C	C	G	A	T	T	C	T	C	A
LEUANG PRA TAHN::IRGC 48292-2::[IRIS 313-11389]	IRIS 313-11389		ind3	11	C	G	G	G	C	C	A	A	C	A	G	G	T	G	T	C	G	G	A	C	T	G	C	A	G	G	T	G	T	C	C	A	T	T	G	C	C	G	A	T	T	C	T	C	A
JAIBATTEY::[B030]	B030	IRGC 135950	indx	11	C	G	G	G	C	C	A	A	C	A	G	G	T	G	T	C	G	G	A	C	T	G	C	A	G	G	T	G	T	C	C	A	T	T	G	C	C	G	A	T	T	C	T	C	A
XI GAN JING REN::IRGC 60035-1::[IRIS 313-9184]	IRIS 313-9184	IRGC 126014	indx	11	C	G	G	G	C	C	A	A	C	A	G	G	T	G	T	C	G	G	A	C	T	G	C	A	G	G	T	G	T	C	C	A	T	T	G	C	C	G	A	T	T	C	T	C	A
AI ZI DAO::[CX50]	CX50		ind1B	11	C	G	G	G	C	C	A	A	C	A	G	G	T	G	T	C	G	G	A	C	T	G	C	A	G	G	T	G	T	C	C	A	T	T	G	C	C	G	A	T	T	C	T	C	A
KORTIK KAIKA::IRGC 31841-1::[IRIS 313-11116]	IRIS 313-11116	IRGC 127532	aus	10.5	C	G	G	G	C	C	A	A	C	A	G	G	T	G	T	C	G	G	A	C	T	T/G	C	A	G	G	T	G	T	C	C	A	T		G	C	C	G	A	T	T	C	T	C	A
IR 73571-3B-11-3-K2::G1::[IRIS 313-15906]	IRIS 313-15906	IRGC 126963	indx	11	C	G	G	G	C	C	A	A	C	A	G	G	T	G	T	C	G	G	A	C	T	G	C	A	G	G	T	G	T	C	C	A	T	T	G	C	C	G	A	T	T	C	T	C	A
77 UPLA::GERVEX 159-C1::[IRIS 313-8060]	IRIS 313-8060	IRGC 121955	trop	11	C	G	G	G	C	C	A	A	C	A	G	G	T	G	T	C	G	G	A	C	T	G	C	A	G	G	T	G	T	C	C	A	T	T	G	C	C	G	A	T	T	C	T	C	A
CHANH 148::[B184]	B184	IRGC 135862	indx	11	C	G	G	G	C	C	A	A	C	A	G	G	T	G	T	C	G	G	A	C	T	G	C	A	G	G	T	G	T	C	C	A	T	T	G	C	C	G	A	T	T	C	T	C	A
VIETNAM 1::C1::[IRIS 313-8011]	IRIS 313-8011	IRGC 122281	subtrop	11	C	G	G	G	C	C	A	A	C	A	G	G	T	G	T	C	G	G	A	C	T	G	C	A	G	G	T	G	T	C	C	A	T	T	G	C	C	G	A	T	T	C	T	C	A
ZHENDAO 232::[B239]	B239	IRGC 136091	ind1A	12	C	G	G	G	C	C	A	A	C	A	G	G	T	G	T	C	G	G	A	C	T	G	C	A	G	G	T	G	T	C	C	A	T	T	G	C	C	G	A	T	T	C	T	C	A
HUO QING::IRGC 72148-1::[IRIS 313-11865]	IRIS 313-11865	IRGC 127423	ind1A	11	C	G	G	G	C	C	A	A	C	A	G	G	T	G	T	C	G	G	A	C	T	G	C	A	G	G	T	G	T	C	C	A	T	T	G	C	C	G	A	T	T	C	T	C	A
QINGSIAI 16B::[B153]	B153		indx	11	C	G	G	G	C	C	A	A	C	A	G	G	T	G	T	C	G	G	A	C	T	G	C	A	G	G	T	G	T	C	C	A	T	T	G	C	C	G	A	T	T	C	T	C	A
BIRUI SAIL::IRGC 31745-2::[IRIS 313-11114]	IRIS 313-11114	IRGC 132305	ind2	11	C	G	G	G	C	C	A	A	C	A	G	G	T	G	T	C	G	G	A	C	T	G	C	A	G	G	T	G	T	C	C	A	T	T	G	C	C	G	A	T	T	C	T	C	A
T KAUG PAO::IRGC 34182-1::[IRIS 313-11157]	IRIS 313-11157	IRGC 127863	ind1A	11	C	G	G	G	C	C	A	A	C	A	G	G	T	G	T	C	G	G	A	C	T	G	C	A	G	G	T	G	T	C	C	A	T	T	G	C	C	G	A	T	T	C	T	C	A
KADA CHOPA::IRGC 34954-1::[IRIS 313-11168]	IRIS 313-11168	IRGC 127473	aus	9	C	G	G	G	C	C	A	A	C	A	G	G	T	G	T	C	G	G	A	C	T	G	C	A	G	G			T	C	C	A	T	T	G	C	C	G	A	T	T	C	T	C	A
KHAO THI RATE::IRGC 58041-1::[IRIS 313-8793]	IRIS 313-8793	IRGC 126223	ind3	10	C	G	G	G	C	C	A	A	C	A	G	G	T	G	T	C	G	G	A	C	T		C	A	G	G	T	G	T	C	C	A	T	T	G	C	C	G	A	T	T	C	T	C	A
BW 295-5::IRGC 63098-1::[IRIS 313-10002]	IRIS 313-10002	IRGC 125955	ind1B	11	C	G	G	G	C	C	A	A	C	A	G	G	T	G	T	C	G	G	A	C	T	G	C	A	G	G	T	G	T	C	C	A	T	T	G	C	C	G	A	T	T	C	T	C	A
SUNAR::IRGC 27470-1::[IRIS 313-11011]	IRIS 313-11011	IRGC 127830	indx	11	C	G	G	G	C	C	A	A	C	A	G	G	T	G	T	C	G	G	A	C	T	G	C	A	G	G	T	G	T	C	C	A	T	T	G	C	C	G	A	T	T	C	T	C	A
MAYAS PUTIH::IRGC 43727-2::[IRIS 313-11320]	IRIS 313-11320		ind3	11	C	G	G	G	C	C	A	A	C	A	G	G	T	G	T	C	G	G	A	C	T	G	C	A	G	G	T	G	T	C	C	A	T	T	G	C	C	G	A	T	T	C	T	C	A
ARC 15589::IRGC 42096-2::[IRIS 313-11282]	IRIS 313-11282	IRGC 132243	ind2	11	C	G	G	G	C	C	A	A	C	A	G	G	T	G	T	C	G	G	A	C	T	G	C	A	G	G	T	G	T	C	C	A	T	T	G	C	C	G	A	T	T	C	T	C	A
KHAO THAMA::IRGC 29838-2::[IRIS 313-11086]	IRIS 313-11086	IRGC 128087	ind3	11	C	G	G	G	C	C	A	A	C	A	G	G	T	G	T	C	G	G		C	T	G	C	A	G	G	T	G	T	C	C	A	T	T	G	C	C	G	A	T	T	C	T	C	A
TSIPALA 1231::GERVEX 8418-C1::[IRIS 313-7792]	IRIS 313-7792	IRGC 124425	indx	10.5	C	G	G	G	C	C	A	A	C	A	G	G	T	G	T	C	G	G	A	C	T	G	C	A	G	G	T	G	T	C	C	A	T	T	G	C	C	G	A	T	T	C	T	C	A
CHE MAH::IRGC 79480-1::[IRIS 313-12005]	IRIS 313-12005	IRGC 132395	ind3	10.5	C	G	G	G	C	C	A	A	C	A	G	G	T	G	T	C	G	G	A	C	T	G	C	A	G	G	T	G	T	C	C	A	T	T	G	C	C	G	A	T	T	C	T	C	A
KANAI BASHI::IRGC 34967-1::[IRIS 313-11169]	IRIS 313-11169	IRGC 131997	aus	11	C	G	G	G	C	C	A	A	C	A	G	G	T	G	T	C	G	G	A	C	T	G	C	A	G	G	T	G	T	C	C	A	T	T	G	C	C	G	A	T	T	C	T	C	A
PA LOSSES 3::IRGC 77810-1::[IRIS 313-11975]	IRIS 313-11975		ind3	11	C	G	G	G	C	C	A	A	C	A	G	G	T	G	T	C	G	G	A	C	T	G	C	A	G	G	T	G	T	C	C	A	T	T	G	C	C	G	A	T	T	C	T	C	A
QIUQIANBAI::[B072]	B072		ind1A	8	C	G	G	G	C	C	A	A	C	A	G	G	T	G	T	C	G	G	A	C	T	G	C	A	G	G	C/T	G	T	C	C	A	T	T	G	C	C	G	A	T	T	C	T	C	A
IRAT144::[CX247]	CX247	IRGC 135942	indx	10.5	C	G	G	G	C	C	A	A	C	A	G	G	T	G	T	C	G	G	A	C	T	G	C	A	G	G	T	G	T	C	C	A	T	T	G	C	C	G	A	T	T	C	T	C	A
SICAN::IRGC 117029-1::[IRIS 313-10285]	IRIS 313-10285	IRGC 121119	indx	10	C	G	G	G	C	C	A	A	C	A	G	G	T	G	T	C	G	G	A	C	T	G	C	A	G	G	T	G	T	C	C	A	T	T	G	C	C	G	A	T	T	C	T	C	A
RANDAH SASAK::IRGC 13652-2::[IRIS 313-10692]	IRIS 313-10692	IRGC 132367	ind3	10.5	C	G	G	G	C	C	A	A	C	A	G	G	T	G	T	C	G	G	A	C	T	G	C	A	G	G	T	G	T	C	C	A	T	T	G	C	C	G	A	T	T	C	T	C	A
MAMAS::IRGC 16503-1::[IRIS 313-10742]	IRIS 313-10742	IRGC 127600	ind3	10.5	C	G	G	G	C	C	A	A	C	A	G	G	T	G	T	C	G	G	A	C	T	G	C	A	G	G	T	G	T	C	C	A	T	T	G	C	C	G	A	T	T	C	T	C	A
KERAN DUKUH::IRGC 17822-2::[IRIS 313-10779]	IRIS 313-10779	IRGC 128521	ind3	10.5	C	G	G	G	C	C	A	A	C	A	G	G	T	G	T	C	G	G	A	C	T	G	C	A	G	G	T	G	T	C	C	A	T	T	G	C	C	G	A	T	T	C	T	C	A
DUDHSAR::IRGC 26458-1::[IRIS 313-10980]	IRIS 313-10980	IRGC 127344	admix	10.5	C	G	G	G	C	C	A	A	C	A	G	G	T	G	T	C	G	G	A	C	T	G	C	A	G	G	T	G	T	C	C	A	T	T	G	C	C	G	A	T	T	C	T	C	A
SANPATONG NYAY::IRGC 99050-1::[IRIS 313-12309]	IRIS 313-12309	IRGC 127785	ind3	10.5	C	G	G	G	C	C	A	A	C	A	G	G	T	G	T	C	G	G	A	C	T	G	C	A	G	G	T	G	T	C	C	A	T	T	G	C	C	G	A	T	T	C	T	C	A
NCS 237::IRGC 62202-1::[IRIS 313-9492]	IRIS 313-9492	IRGC 125853	ind2	10.5	C	G	G	G	C	C	A	A	C	A	G	G	T	G	T	C	G	G	A	C	T	G	C	A	G	G	T	G	T	C	C	A	T	T	G	C	C	G	A	T	T	C	T	C	A
TEQINGXUANHUI::[B145]	B145		indx	10.5	C	G	G	G	C	C	A	A	C	A	G	G	T	G	T	C	G	G	A	C	T	G	C	A	G	G	T	G	T	C	C	A	T	T	G	C	C	G	A	T	T	C	T	C	A
ANNONGWANGENG B::[B250]	B250		temp	6.5	C	G	G	G	C	C	A	A	C	A	G	G	T	G	T	C	G	G	A	C	T	T/G	C	A	G	G	C/T	A/G	T	C	C	A	T	T	G	C	C	G	A	T	T	C	T	C	A
BG 94-1::[CX35]	CX35	IRGC 135843	indx	9	C	G	G	G	C	C	A	A	C	A	G	G	T	G	T	C	G	G	A	C	T	G	C	A	G	G	C/T	G	T	C	C	A	T	T	G	C	C	G	A	T	T	C	T	C	A
TGMS29::[CX93]	CX93	IRGC 136054	indx	8.5	C	G	G	G	C	C	A	A	C	A	G	G	T	G	T	C	G	G	A	C	T	G	C	A	G	G	T	G	T	C	C	A	T	T	G		C	G	A	T	T	C	T	C	A
KWATIK PUTIH::IRGC 18053-1::[IRIS 313-10787]	IRIS 313-10787		ind3	7	C	G	G	G	C	C	A	A	C/T	A	G	G	T	G	T	C	G	G	A	C	T	T/G	C	A	G	G	C/T	A/G	T	C	C	A	T	T	G	C	C	G	A	T	T	C	T	C	A
IR 77298-14-1-2-10::G1::[IRIS 313-15901]	IRIS 313-15901	IRGC 126964	ind1B	10.5	C	G	G	G	C	C	A	A	C	A	G	G	T	G	T	C	G	G	A	C	T	G	C	A	G	G	T	G	T	C	C	A	T	T	G	C	C	G	A	T	T	C	T	C	A
SADUMONI::IRGC 25919-1::[IRIS 313-10964]	IRIS 313-10964	IRGC 127777	aus	9	C	G	G	G	C	C	A	A	C	A	G	G	T	G	T	C	G	G	A	C	T	G	C	A	G	G	T	G	T	C	C	A	T	T	G	C	C	G	A	T	T	C		C	A
BAOXIE 123B::[B202]	B202		indx	10	C	G	G	G	C	C	A	A	C	A	G	G	T	G	T	C	G	G	A	C	T	G	C	A	G	G	T	G	T	C	C	A	T	T	G	C	C	G	A	T	T	C	T	C	A
221 B 36-1-1-1-1::IRGC 7585-1::[IRIS 313-10565]	IRIS 313-10565	IRGC 127098	indx	10		G	G	G	C	C	A	A	C	A	G	G	T	G	T	C	G	G	A	C	T	G	C	A	G	G	T	G	T	C	C	A	T	T	G	C	C	G	A	T	T	C	T	C	A
TV 30::IRGC 55221-1::[IRIS 313-11507]	IRIS 313-11507	IRGC 127870	ind1B	10	C	G	G	G	C	C	A	A	C	A	G	G	T	G	T	C	G	G	A	C	T	G	C	A	G	G	T	G	T	C	C	A	T	T	G	C	C	G	A	T	T	C	T	C	A
KANU DAM::IRGC 29755-1::[IRIS 313-9249]	IRIS 313-9249	IRGC 125794	temp	10	C	G	G	G	C	C	A	A	C	A	G	G	T	G	T	C	G	G	A	C	T	G	C	A	G	G	T	G	T	C	C	A	T	T	G	C	C	G	A	T	T	C	T	C	A
KHSAY VENG::IRGC 22915-1::[IRIS 313-10903]	IRIS 313-10903	IRGC 135762	ind3	10	C	G	G	G	C	C	A	A	C	A	G	G	T	G	T	C	G	G	A	C	T	G	C	A	G	G	T	G	T	C	C	A	T	T	G	C	C	G	A	T	T	C	T	C	A
SABRAN::IRGC 34630-1::[IRIS 313-11162]	IRIS 313-11162	IRGC 127775	ind1B	10	C	G	G	G	C	C	A	A	C	A	G	G	T	G	T	C	G	G	A	C	T	G	C	A	G	G	T	G	T	C	C	A	T	T	G	C	C	G	A	T	T	C	T	C	A
KUTAI PAYA::IRGC 19528-1::[IRIS 313-8723]	IRIS 313-8723	IRGC 126033	ind3	10	C	G	G	G	C	C	A	A	C	A	G	G	T	G	T	C	G	G	A	C	T	G	C	A	G	G	T	G	T	C	C	A	T	T	G	C	C	G	A	T	T	C	T	C	A
KARIA::IRGC 6702-1::[IRIS 313-10545]	IRIS 313-10545	IRGC 127492	aus	10	C	G	G	G	C	C	A	A	C	A	G	G	T	G	T	C	G	G	A	C	T	G	C	A	G	G	T	G	T	C	C	A	T	T	G	C	C	G	A	T	T	C	T	C	A
AMERICAN HUANGKEDAO::[B018]	B018	IRGC 135827	trop	8	C	G	G	G	C	T	A	A	C	A	G	G	T	G	T	C	A	G	A	C	T	G	C	A	G	G	C	G	T	C	C	A	T	T	G	C	C	G	A	T	T	C	T	C	A
NANOAY P.A::[B037]	B037	IRGC 135999	trop	7	C	G	G	G	C	T	A	A	C	A	G	G	T	G	T	C	G/A	G	A	C	T	G	C	A	G	G		G	T	C	C	A	T	T	G	C	C	G	A	T	T	C	T	C	A
80A60YR71009-1-5::[B191]	B191	IRGC 135818	trop	8	C	G	G	G	C	T	A	A	C	A	G	G	T	G	T	C	A	G	A	C	T	G	C	A	G	G	C	G	T	C	C	A	T	T	G	C	C	G	A	T	T	C	T	C	A
MANAUTHUKHA::[CX32]	CX32	IRGC 135980	japx	8	C	G	G	G	C	T	A	A	C	A	G	G	T	G	T	C	A	G	A	C	T	G	C	A	G	G	C	G	T	C	C	A	T	T	G	C	C	G	A	T	T	C	T	C	A
NERICA 2::[CX372]	CX372	IRGC 136001	trop	23	T	T	G	G	A	C	C	T	C	G	G	C	T	G	T	C	G	G	A	C	T	G	C	A	G	C	C	G	T	C	G	A	T	T	A	C	C	G	A	T	T	C	T	C	A
GARURA::IRGC 64111-1::[IRIS 313-10007]	IRIS 313-10007	IRGC 125749	indx	8	C	G	G	G	C	T	A	A	C	A	G	G	T	G	T	C	A	G	A	C	T	G	C	A	G	G	C	G	T	C	C	A	T	T	G	C	C	G	A	T	T	C	T	C	A
BOTOHAVANA MENA::IRGC 69349-1::[IRIS 313-10041]	IRIS 313-10041	IRGC 126049	trop	8	C	G	G	G	C	T	A	A	C	A	G	G	T	G	T	C	A	G	A	C	T	G	C	A	G	G	C	G	T	C	C	A	T	T	G	C	C	G	A	T	T	C	T	C	A
KETAN MENAH::IRGC 48733-1::[IRIS 313-10152]	IRIS 313-10152	IRGC 125798	trop	8	C	G	G	G	C	T	A	A	C	A	G	G	T	G	T	C	A	G	A	C	T	G	C	A	G	G	C	G	T	C	C	A	T	T	G	C	C	G	A		T	C	T	C	A
PICO NEGRO::IRGC 55849-1::[IRIS 313-10158]	IRIS 313-10158	IRGC 126080	indx	7.5	C	G	G	G	C	C/T	A	A	C	A	G	G	T	G	T	C	A	G	A	C	T	G	C	A	G	G	C	G	T	C	C	A	T	T	G	C	C	G	A	T	T	C	T	C	A
GUO DI HEI::IRGC 72697-1::[IRIS 313-10196]	IRIS 313-10196		trop	8	C	G	G	G	C	T	A	A	C	A	G	G	T	G	T	C	A	G	A	C	T	G	C	A	G	G	C	G	T	C	C	A	T	T	G	C	C	G	A	T	T	C	T	C	A
IR 65483-111-5-9-2-11::IRGC 117286-1::[IRIS 313-10366]	IRIS 313-10366	IRGC 125976	indx	8	C	G	G	G	C	C	A	A	C	A	G	G	T	G	T	C	A	G	A	C	T	G	C	A	G	G	C	G	T	C	C	A	T	T	G	C	C	G	A	T	T	C	T	C	A
IR 80310-12-B-1-3-B::IRGC 117307-1::[IRIS 313-10394]	IRIS 313-10394	IRGC 125986	indx	9	C	G	G	G	C	C	A	A	C	A	G	G	T	G	T	C	G	G	A	T	T	G	C	A	G	G	C	G	A	C	C	A	T	T	G	C	C	G	A	T	T	C	T	C	T
KALAMON 113::IRGC 6534-1::[IRIS 313-10537]	IRIS 313-10537		admix	5	C	G	G	G	C	C	A	A	C	A	G	G	T	G	T	C	G	G	A	C	T	G	C	A	G	G	C	G	T	C	C	A	T	T	G	C	C	G	A	T	T	C	T	C	A
DODGUI::IRGC 6666-1::[IRIS 313-10543]	IRIS 313-10543	IRGC 128281	aus	8	C	G	G	G	C	C	A	A	C	A	G	G	T	G	T	C	G	G	A	C		G	C	A	G	G	C	G	T	C	C	A	T	T	G	C	C	A	A	T	T	C	T	C	A
T 21::IRGC 8892-1::[IRIS 313-10608]	IRIS 313-10608	IRGC 127832	aus	5	C	G	G	G	C	C	A	A	C	A	G	G	T	G	T	C	G	G	A	C	T	G	C	A	G	G	C	G	T	C	C	A	T	T	G	C	C	G	A	T	T	C	T	C	A
SIDALI::IRGC 9567-1::[IRIS 313-10623]	IRIS 313-10623	IRGC 127804	aus	5	C	G	G	G	C	C	A	A	C	A	G	G	T	G	T	C	G	G	A	C	T	G	C	A	G	G	C	G	T	C	C	A	T	T	G	C	C	G	A	T	T	C	T	C	A
O. SATIVA::IRGC 10164-2::[IRIS 313-10628]	IRIS 313-10628	IRGC 132361	ind2	8	C	G	G	G	C	T	A	A	C	A	G	G	T	G	T	C	A	G	A	C	T	G	C	A	G	G	C	G	T	C	C	A	T	T	G	C	C	G	A	T	T	C	T	C	A
MAK NAM::IRGC 12940-2::[IRIS 313-10680]	IRIS 313-10680	IRGC 132354	ind3	8	C	G	G	G	C	T	A	A	C	A	G	G	T	G	T	C	A	G	A	C	T	G	C	A	G	G	C	G	T	C	C	A	T	T	G	C	C	G	A	T	T	C	T	C	A
PADI ADONG DUMARAT::IRGC 14356-1::[IRIS 313-10703]	IRIS 313-10703	IRGC 128418	trop	8	C	G	G	G	C	T	A	A	C	A	G	G	T	G	T	C	A	G	A	C	T	G	C	A	G	G	C	G	T	C	C	A	T	T	G	C	C	G	A	T	T	C	T	C	A
B 6311 A 5553-16-2::IRGC 14541-1::[IRIS 313-10708]	IRIS 313-10708	IRGC 128233	trop	8	C	G	G	G	C	T	A	A	C	A	G	G	T	G	T	C	A	G	A	C	T	G	C	A	G	G	C	G	T	C	C	A	T	T	G	C	C	G	A	T	T	C	T	C	A
O. SATIVA::IRGC 16898-1::[IRIS 313-10752]	IRIS 313-10752	IRGC 128415	trop	8	C	G	G	G	C	T	A	A	C	A	G	G	T	G	T	C	A	G	A	C	T	G	C	A	G	G	C	G	T	C	C	A	T	T	G	C	C	G	A	T	T	C	T	C	A
DAMODAR::IRGC 17038-1::[IRIS 313-10756]	IRIS 313-10756	IRGC 127299	ind2	8	C	G	G	G	C	T	A	A	C	A	G	G	T	G	T	C	A	G	A	C	T	G	C	A	G	G	C	G	T	C	C	A	T	T	G	C	C	G	A	T	T	C	T	C	A
ANDEL::IRGC 17153-2::[IRIS 313-10759]	IRIS 313-10759	IRGC 127927	trop	8	C	G	G	G	C	T	A	A	C	A	G	G	T	G	T	C	A	G	A	C	T	G	C	A	G	G	C	G	T	C	C	A	T	T	G	C	C	G	A	T	T	C	T	C	A
INAMBOG::IRGC 19415-1::[IRIS 313-10829]	IRIS 313-10829	IRGC 128320	trop	8	C	G	G	G	C	T	A	A	C	A	G	G	T	G	T	C	A	G	A	C	T	G	C	A	G	G	C	G	T	C	C	A	T	T	G	C	C	G	A	T	T	C	T	C	A
ARC 10159::IRGC 20754-2::[IRIS 313-10855]	IRIS 313-10855	IRGC 132316	ind2	8	C	G	G	G	C	T	A	A	C	A	G	G	T	G	T	C	A	G	A	C	T	G	C	A	G	G	C	G	T	C	C	A	T	T	G	C	C	G	A	T	T	C	T	C	A
ARC 12690::IRGC 22257-1::[IRIS 313-10887]	IRIS 313-10887	IRGC 127147	indx	8	C	G	G	G	C	T	A	A	C	A	G	G	T	G	T	C	A	G	A	C	T	G	C	A	G	G	C	G	T	C	C	A	T	T	G	C	C	G	A	T	T	C	T	C	A
KAMULI::IRGC 23928-1::[IRIS 313-10925]	IRIS 313-10925	IRGC 127485	aus	5	C	G	G	G	C	C	A	A	C	A	G	G	T	G	T	C	G	G	A	C	T	G	C	A	G	G	C	G	T	C	C	A	T	T	G	C	C	G	A	T	T	C	T	C	A
RAM SALEE KATAKA::IRGC 24014-1::[IRIS 313-10926]	IRIS 313-10926	IRGC 127761	aro	5	C	G	G	G	C	C	A	A	C	A	G	G	T	G	T	C	G	G	A	C	T	G	C	A	G	G	C	G	T	C	C	A	T	T	G	C	C	G	A	T	T	C	T	C	A
PAEDAI SOBUDI::IRGC 27222-1::[IRIS 313-11001]	IRIS 313-11001	IRGC 128421	trop	8	C	G	G	G	C	T	A	A	C	A	G	G	T	G	T	C	A	G	A	C	T	G	C	A	G	G	C	G	T	C	C	A	T	T	G	C	C	G	A	T	T	C	T	C	A
DHAN 263::IRGC 27926-2::[IRIS 313-11025]	IRIS 313-11025	IRGC 128030	aus	7	C	G	G	G	C	C	A	A	C	A	G	G	T	G	T	C	G	G	A	C	T	G	C	A	G	G	C	G	T	C	C	A	T	T	G	C	C	G	A	T	T	T	T	C	A
LALANGIT::IRGC 28715-1::[IRIS 313-11046]	IRIS 313-11046		trop	8	C	G	G	G	C	T	A	A	C	A	G	G	T	G	T	C	A	G	A	C	T	G	C	A	G	G	C	G	T	C	C	A	T	T	G	C	C	G	A	T	T	C	T	C	A
KHAO MAK KHAM::IRGC 29533-1::[IRIS 313-11074]	IRIS 313-11074		ind3	8	C	G	G	G	C	T	A	A	C	A	G	G	T	G	T	C	A	G	A	C	T	G	C	A	G	G	C	G	T	C	C	A	T	T	G	C	C	G	A	T	T	C	T	C	A
NGALONGYI::IRGC 33479-2::[IRIS 313-11137]	IRIS 313-11137	IRGC 128118	indx	8	C	G	G	G	C	T	A	A	C	A	G	G	T	G	T	C	A	G	A	C	T	G	C	A	G	G	C	G	T	C	C	A	T	T	G	C	C	G	A	T	T	C	T	C	A
KHUDWANI ACC 202::IRGC 34154-1::[IRIS 313-11156]	IRIS 313-11156	IRGC 127522	japx	8	C	G	G	G	C	T	A	A	C	A	G	G	T	G	T	C	A	G	A	C	T	G	C	A	G	G	C	G	T	C	C	A	T	T	G	C	C	G	A	T	T	C	T	C	A
NIAW KHAMIN::IRGC 40222-1::[IRIS 313-11248]	IRIS 313-11248	IRGC 127676	trop	8	C	G	G	G	C	T	A	A	C	A	G	G	T	G	T	C	A	G	A	C	T	G	C	A	G	G	C	G	T	C	C	A	T	T	G	C	C	G	A	T	T	C	T	C	A
ARC 12800::IRGC 42720-2::[IRIS 313-11296]	IRIS 313-11296	IRGC 127945	indx	8	C	G	G	G	C	T	A	A	C	A	G	G	T	G	T	C	A	G	A	C	T	G	C	A	G	G	C	G	T	C	C	A	T	T	G	C	C	G	A	T	T	C	T	C	A
ARC 15163::IRGC 43106-1::[IRIS 313-11304]	IRIS 313-11304	IRGC 127158	indx	8	C	G	G	G	C	T	A	A	C	A	G	G	T	G	T	C	A	G	A	C	T	G	C	A	G	G	C	G	T	C	C	A	T	T	G	C	C	G	A	T	T	C	T	C	A
INANUPAN::IRGC 44461-2::[IRIS 313-11335]	IRIS 313-11335	IRGC 132339	ind2	8	C	G	G	G	C	T	A	A	C	A	G	G	T	G	T	C	A	G	A	C	T	G	C	A	G	G	C	G	T	C	C	A	T	T	G	C	C	G	A	T	T	C	T	C	A
BANCHI::IRGC 45055-2::[IRIS 313-11351]	IRIS 313-11351	IRGC 127986	ind2	8	C	G	G	G	C	T	A	A	C	A	G	G	T	G	T	C	A	G	A	C	T	G	C	A	G	G	C	G	T	C	C	A	T	T	G	C	C	G	A	T	T	C	T	C	A
CAC 75::IRGC 45352-2::[IRIS 313-11354]	IRIS 313-11354	IRGC 128008	ind2	8	C	G	G	G	C	T	A	A	C	A	G	G	T	G	T	C	A	G	A	C	T	G	C	A	G	G	C	G	T	C	C	A	T	T	G	C	C	G	A	T	T	C	T	C	A
DADKHANI::IRGC 45454-2::[IRIS 313-11358]	IRIS 313-11358	IRGC 128023	ind2	8	C	G	G	G	C	T	A	A	C	A	G	G	T	G	T	C	A	G	A	C	T	G	C	A	G	G	C	G	T	C	C	A	T	T	G	C	C	G	A	T	T	C	T	C	A
MAKARANDASAIL::IRGC 46289-2::[IRIS 313-11367]	IRIS 313-11367	IRGC 128103	ind2	8	C	G	G	G	C	T	A	A	C	A	G	G	T	G	T	C	A	G	A	C	T	G	C	A	G	G	C	G	T	C	C	A	T	T	G	C	C	G	A	T	T	C	T	C	A
SUFALDHULA::IRGC 46698-2::[IRIS 313-11372]	IRIS 313-11372	IRGC 128173	ind2	7	C	G	G	G	C	C	A	A	C	A	G	G	T	G	T	C	G	G	A	C	T	G	C	A	G	G	C	G	T	C	C	A	T	T	G	C	C	G	A	T	T	C	T	C	A
RAYDHAN 1::IRGC 49127-2::[IRIS 313-11399]	IRIS 313-11399	IRGC 128148	indx	8	C	G	G	G	C	T	A	A	C	A	G	G	T	G	T	C	A	G	A	C	T	G	C	A	G	G	C	G	T	C	C	A	T	T	G	C	C	G	A	T	T	C	T	C	A
AEB 368 RIP P TYPE ADT::IRGC 49359-2::[IRIS 313-11403]	IRIS 313-11403	IRGC 127923	indx	7.5	C	G	G	G	C	C/T	A	A	C	A	G	G	T	G	T	C	A	G	A	C	T	G	C	A	G	G	C	G	T	C	C	A	T	T	G	C	C	G	A	T	T	C	T	C	A
KALISAL::IRGC 52324-1::[IRIS 313-11451]	IRIS 313-11451	IRGC 128330	aro	5	C	G	G	G	C	C	A	A	C	A	G	G	T	G	T	C	G	G	A	C	T	G	C	A	G	G	C	G	T	C	C	A	T	T	G	C	C	G	A	T	T	C	T	C	A
SELHI::IRGC 52760-1::[IRIS 313-11460]	IRIS 313-11460	IRGC 127792	ind2	7.5	C	G	G	G	C	C/T	A	A	C	A	G	G	T	G	T	C	A	G	A	C	T	G	C	A	G	G	C	G	T	C	C	A	T	T	G	C	C	G	A	T	T	C	T	C	A
PADI HEDENG (REKET HEDENG)::IRGC 54266-1::[IRIS 313-11498]	IRIS 313-11498	IRGC 132023	trop	8	C	G	G	G	C	T	A	A	C	A	G	G	T	G	T	C	A	G	A	C	T	G	C	A	G	G	C	G	T	C	C	A	T	T	G	C	C	G	A	T	T	C	T	C	A
HOE PHAR THAE::IRGC 57907-1::[IRIS 313-11541]	IRIS 313-11541	IRGC 127410	indx	8	C	G	G	G	C	T	A	A	C	A	G	G	T	G	T	C	A	G	A	C	T	G	C	A	G	G	C	G	T	C	C	A	T	T	G	C	C	G	A	T	T	C	T	C	A
KHAO KUM PAR::IRGC 57966-1::[IRIS 313-11542]	IRIS 313-11542	IRGC 132402	admix	8	C	G	G	G	C	C	A	A	C	A	G	G	T	G	T	C	A	G	A	C	T	G	C	A	G	G	C	G	T	C	C	A	T	T	G	C	C	G	A	T	T	C	T	C	A
NGA CHAN HMWE::IRGC 58146-1::[IRIS 313-11546]	IRIS 313-11546	IRGC 127672	indx	8	C	G	G	G	C	T	A	A	C	A	G	G	T	G	T	C	A	G	A	C	T	G	C	A	G	G	C	G	T	C	C	A	T	T	G	C	C	G	A	T	T	C	T	C	A
BIJULI BATI::IRGC 58917-1::[IRIS 313-11563]	IRIS 313-11563	IRGC 127227	ind2	7	C	G	G	G	C	T	A	A	C	A	G	G	T	G	T	C	G/A	G	A	C	T	T/G	C	A	G	G	C	G	T	C	C	A	T	T	G	C	C	G	A	T	T	C	T	C	A
HALIDA::IRGC 59005-1::[IRIS 313-11564]	IRIS 313-11564	IRGC 127400	aro	5	C	G	G	G	C	C	A	A	C	A	G	G	T	G	T	C	G	G	A	C	T	G	C	A	G	G	C	G	T	C	C	A	T	T	G	C	C	G	A	T	T	C	T	C	A
KUSUM KATIKI::IRGC 59099-1::[IRIS 313-11565]	IRIS 313-11565	IRGC 127536	ind2	8	C	G	G	G	C	T	A	A	C	A	G	G	T	G	T	C	A	G	A	C	T	G	C	A	G	G	C	G	T	C	C	A	T	T	G	C	C	G	A	T	T	C	T	C	A
UPRH 33::IRGC 61505-1::[IRIS 313-11617]	IRIS 313-11617	IRGC 128495	aus	5	C	G	G	G	C	C	A	A	C	A	G	G	T	G	T	C	G	G	A	C	T	G	C	A	G	G	C	G	T	C	C	A	T	T	G	C	C	G	A	T	T	C	T	C	A
UPRH 166::IRGC 61615-1::[IRIS 313-11619]	IRIS 313-11619	IRGC 127875	aus	5	C	G	G	G	C	C	A	A	C	A	G	G	T	G	T	C	G	G	A	C	T	G	C	A	G	G	C	G	T	C	C	A	T	T	G	C	C	G	A	T	T	C	T	C	A
UPRH 197::IRGC 61641-1::[IRIS 313-11620]	IRIS 313-11620	IRGC 127876	aus	5	C	G	G	G	C	C	A	A	C	A	G	G	T	G	T	C	G	G	A	C	T	G	C	A	G	G	C	G	T	C	C	A	T	T	G	C	C	G	A	T	T	C	T	C	A
JADO::IRGC 61966-1::[IRIS 313-11627]	IRIS 313-11627	IRGC 127448	aro	5	C	G	G	G	C	C	A	A	C	A	G	G	T	G	T	C	G	G	A	C	T	G	C	A	G	G	C	G	T	C	C	A	T	T	G	C	C	G	A	T	T	C	T	C	A
SETO JHINUWA::IRGC 62043-1::[IRIS 313-11632]	IRIS 313-11632	IRGC 128466	aro	5	C	G	G	G	C	C	A	A	C	A	G	G	T	G	T	C	G	G	A	C	T	G	C	A	G	G	C	G	T	C	C	A	T	T	G	C	C	G	A	T	T	C	T	C	A
NCS 458::IRGC 62290-1::[IRIS 313-11640]	IRIS 313-11640	IRGC 127658	ind2	8	C	G	G	G	C	T	A	A	C	A	G	G	T	G	T	C	A	G	A	C	T	G	C	A	G	G	C	G	T	C	C	A	T	T	G	C	C	G	A	T	T	C	T	C	A
NCS 599::IRGC 62373-1::[IRIS 313-11642]	IRIS 313-11642	IRGC 127661	ind2	8	C	G	G	G	C	T	A	A	C	A	G	G	T	G	T	C	A	G	A	C	T	G	C	A	G	G	C	G	T	C	C	A	T	T	G	C	C	G	A	T	T	C	T	C	A
NCS 745::IRGC 62466-1::[IRIS 313-11644]	IRIS 313-11644	IRGC 127663	ind2	7	C	G	G	G	C	C	A	A	C	A	G	G	T	G	T	C	G	G	A	C	T	G	C	A	G	G	C	G	T	C	C	A	T	T	G	C	C	G	A	T	T	C	T	C	A
NCS 766::IRGC 62478-1::[IRIS 313-11645]	IRIS 313-11645	IRGC 127664	ind2	7	C	G	G	G	C	C	A	A	C	A	G	G	T	G	T	C	G	G	A	C	T	G	C	A	G	G	C	G	T	C	C	A	T	T	G	C	C	G	A	T	T	C	T	C	A
MA EUE::IRGC 64502-1::[IRIS 313-11682]	IRIS 313-11682	IRGC 127588	ind3	8	C	G	G	G	C	T	A	A	C	A	G	G	T	G	T	C	A	G	A	C	T	G	C	A	G	G	C	G	T	C	C	A	T	T	G	C	C	G	A	T	T	C	T	C	A
BAHN DAENG::IRGC 65771-1::[IRIS 313-11704]	IRIS 313-11704		ind3	5	C	G	G	G	C	C	A	A	C	A	G	G	T	G	T	C	G	G	A	C	T	G	C	A	G	G	C	G	T	C	C	A	T	T	G	C	C	G	A	T	T	C	T	C	A
NS 1515::IRGC 68947-1::[IRIS 313-11762]	IRIS 313-11762	IRGC 127682	ind2	8	C	G	G	G	C	T	A	A	C	A	G	G	T	G	T	C	A	G	A	C	T	G	C	A	G	G	C	G	T	C	C	A	T	T	G	C	C	G	A	T	T	C	T	C	A
BHU BHUSI::IRGC 70803-1::[IRIS 313-11823]	IRIS 313-11823	IRGC 127223	ind2	8	C	G	G	G	C	T	A	A	C	A	G	G	T	G	T	C	A	G	A	C	T	G	C	A	G	G	C	G	T	C	C	A	T	T	G	C	C	G	A	T	T	C	T	C	A
HANSRAJ::IRGC 70836-1::[IRIS 313-11825]	IRIS 313-11825	IRGC 135753	aro	5	C	G	G	G	C	C	A	A	C	A	G	G	T	G	T	C	G	G	A	C	T	G	C	A	G	G	C	G	T	C	C	A	T	T	G	C	C	G	A	T	T	C	T	C	A
KARI GURMATIA::IRGC 70850-1::[IRIS 313-11827]	IRIS 313-11827		ind2	7.5	C	G	G	G	C	T	A	A	C	A	G	G	T	G	T	C	A	G	A	C	T	G	C	A	G	G	C	G	T	C	C	A	T	T	G	C	C	G	A	T	T	C	T	C	A
LALI GURMATIA::IRGC 70854-1::[IRIS 313-11828]	IRIS 313-11828	IRGC 127544	ind2	8	C	G	G	G	C	T	A	A	C	A	G	G	T	G	T	C	A	G	A	C	T	G	C	A	G	G	C	G	T	C	C	A	T	T	G	C	C	G	A	T	T	C	T	C	A
LEUM DERN::IRGC 71288-1::[IRIS 313-11838]	IRIS 313-11838	IRGC 132389	ind3	8	C	G	G	G	C	T	A	A	C	A	G	G	T	G	T	C	A	G	A	C	T	G	C	A	G	G	C	G	T	C	C	A	T	T	G	C	C	G	A	T	T	C	T	C	A
LAKHA KUAR::IRGC 74760-1::[IRIS 313-11919]	IRIS 313-11919	IRGC 127542	ind2	7	C	G	G	G	C	C	A	A	C	A	G	G	T	G	T	C	G	G	A	C	T	G	C	A	G	G	C	G	T	C	C	A	T	T	G	C	C	G	A	T	T	C	T	C	A
SAWK GAM MAH::IRGC 75159-1::[IRIS 313-11925]	IRIS 313-11925	IRGC 132415	ind3	5	C	G	G	G	C	C	A	A	C	A	G	G	T	G	T	C	G	G	A	C	T	G	C	A	G	G	C	G	T	C	C	A	T	T	G	C	C	G	A	T	T	C	T	C	A
KARANGI::IRGC 77128-1::[IRIS 313-11963]	IRIS 313-11963	IRGC 127491	aus	5	C	G	G	G	C	C	A	A	C	A	G	G	T	G	T	C	G	G	A	C	T	G	C	A	G	G	C	G	T	C	C	A	T	T	G	C	C	G	A	T	T	C	T	C	A
PINUTYUKAN::IRGC 78995-1::[IRIS 313-11995]	IRIS 313-11995	IRGC 136101	trop	8	C	G	G	G	C	T	A	A	C	A	G	G	T	G	T	C	A	G	A	C	T	G	C	A	G	G	C	G	T	C	C	A	T	T	G	C	C	G	A	T	T	C	T	C	A
RAUSRR 4::IRGC 79785-1::[IRIS 313-12013]	IRIS 313-12013	IRGC 127767	ind2	8	C	G	G	G	C	T	A	A	C	A	G	G	T	G	T	C	A	G	A	C	T	G	C	A	G	G	C	G	T	C	C	A	T	T	G	C	C	G	A	T	T	C	T	C	A
ACEH (SELECTION)::IRGC 80233-1::[IRIS 313-12027]	IRIS 313-12027	IRGC 131962	ind3	8	C	G	G	G	C	T	A	A	C	A	G	G	T	G	T	C	A	G	A	C	T	G	C	A	G	G	C	G	T	C	C	A	T	T	G	C	C	G	A	T	T	C	T	C	A
PULUT KETAN::IRGC 82674-2::[IRIS 313-12068]	IRIS 313-12068	IRGC 132262	trop	8	C	G	G	G	C	T	A	A	C	A	G	G	T	G	T	C	A	G	A	C	T	G	C	A	G	G	C	G	T	C	C	A	T	T	G	C	C	G	A	T	T	C	T	C	A
KYAUK KYI::IRGC 82773-1::[IRIS 313-12072]	IRIS 313-12072	IRGC 135766	indx	8	C	G	G	G	C	T	A	A	C	A	G	G	T	G	T	C	A	G	A	C	T	G	C	A	G	G	C	G	T	C	C	A	T	T	G	C	C	G	A	T	T	C	T	C	A
SAMRONG 2::IRGC 83951-1::[IRIS 313-12101]	IRIS 313-12101	IRGC 132298	ind3	8	C	G	G	G	C	T	A	A	C	A	G	G	T	G	T	C	A	G	A	C	T	G		A	G	G	C	G	T	C	C	A	T	T	G	C	C	G	A	T	T	C	T	C	A
PERUBAK LUEY::IRGC 86436-1::[IRIS 313-12135]	IRIS 313-12135	IRGC 127726	ind1B	7	C	G	G	G	C	C	A	A	C	A	G	G	T	G	T	C	G	G	A	C	T	G	C	A	G	G	C	G	T	C	C	A	T	T	G	C	C	G	A	T	T	C	T	C	A
CHAO KHAW NYAO::IRGC 89460-1::[IRIS 313-12190]	IRIS 313-12190	IRGC 131975	indx	8.5	C	G	G	G	C	T	A	A	C	A	G	G	T	G	T	C	A	G/T	A	C	T	G	C	A	G	G	C	G	T	C	C	A	T	T	G	C	C	G	A	T	T	C	T	C	A
LOUK PASOM::IRGC 98136-1::[IRIS 313-12297]	IRIS 313-12297	IRGC 127576	indx	8	C	G	G	G	C	T	A	A	C	A	G	G	T	G	T	C	A	G	A	C	T	G	C	A	G	G	C	G	T	C	C	A	T	T	G	C	C	G	A	T	T	C	T	C	A
DISSI::IRGC 101346-1::[IRIS 313-12325]	IRIS 313-12325	IRGC 127321	ind2	8	C	G	G	G	C	T	A	A	C	A	G	G	T	G	T	C	A	G	A	C	T	G	C	A	G	G	C	G	T	C	C	A	T	T	G	C	C	G	A	T	T	C	T	C	A
INIA TACUARI::G1::[IRIS 313-15907]	IRIS 313-15907	IRGC 126959	trop	8	C	G	G	G	C	T	A	A	C	A	G	G	T	G	T	C	A	G	A	C	T	G	C	A	G	G	C	G	T	C	C	A	T	T	G	C	C	G	A	T	T	C	T	C	A
CYPRESS::IRTP 19532-G1::[IRIS 313-15910]	IRIS 313-15910	IRGC 126956	trop	8	C	G	G	G	C	T	A	A	C	A	G	G	T	G	T	C	A	G	A	C	T	G	C	A	G	G	C	G	T	C	C	A	T	T	G	C	C	G	A	T	T	C	T	C	A
NONA BOKRA::IRGC 22710-C1::[IRIS 313-7736]	IRIS 313-7736	IRGC 122181	ind2	8	C	G	G	G	C	T	A	A	C	A	G	G	T	G	T	C	A	G	A	C	T	G	C	A	G	G	C	G	T	C	C	A	T	T	G	C	C	G	A	T	T	C	T	C	A
GANIGI::IRGC 48698-C1::[IRIS 313-7883]	IRIS 313-7883	IRGC 122052	trop	8	C	G	G	G	C	T	A	A	C	A	G	G	T	G	T	C	A	G	A	C	T	G	C	A	G	G	C	G	T	C	C	A	T	T	G	C	C	G	A	T	T	C	T	C	A
91 UPLA::GERVEX 155-C1::[IRIS 313-8058]	IRIS 313-8058	IRGC 121958	trop	8	C	G	G	G	C	T	A	A	C	A	G	G	T	G	T	C	A	G	A	C	T	G	C	A	G	G	C	G	T	C	C	A	T	T	G	C	C	G	A	T	T	C	T	C	A
104 UPLA::GERVEX 167-C1::[IRIS 313-8063]	IRIS 313-8063	IRGC 121947	trop	8	C	G	G	G	C	T	A	A	C	A	G	G	T	G	T	C	A	G	A	C	T	G	C	A	G	G	C	G	T	C	C	A	T	T	G	C	C	G	A	T	T	C	T	C	A
32 UPLA::GERVEX 176-C1::[IRIS 313-8064]	IRIS 313-8064	IRGC 121948	trop	8	C	G	G	G	C	T	A	A	C	A	G	G	T	G	T	C	A	G	A	C	T	G	C	A	G	G	C	G	T	C	C	A	T	T	G	C	C	G	A	T	T	C	T	C	A
PELDE::GERVEX 502-C1::[IRIS 313-8076]	IRIS 313-8076	IRGC 122198	trop	8	C	G	G	G	C	T	A	A	C	A	G	G	T	G	T	C	A	G	A	C	T	G	C	A	G	G	C	G	T	C	C	A	T	T	G	C	C	G	A	T	T	C	T	C	A
BLUE BONNET::GERVEX 669-C1::[IRIS 313-8102]	IRIS 313-8102	IRGC 121984	trop	8	C	G	G	G	C	T	A	A	C	A	G	G	T	G	T	C	A	G	A	C	T	G	C	A	G	G	C	G	T	C	C	A	T	T	G	C	C	G	A	T	T	C	T	C	A
DELLMONT::GERVEX 1647-C1::[IRIS 313-8180]	IRIS 313-8180	IRGC 122035	trop	8	C	G	G	G	C	T	A	A	C	A	G	G	T	G	T	C	A	G	A	C	T	G	C	A	G	G	C	G	T	C	C	A	T	T	G	C	C	G	A	T	T	C	T	C	A
DREW::GERVEX 1650-C1::[IRIS 313-8183]	IRIS 313-8183	IRGC 122304	trop	8	C	G	G	G	C	T	A	A	C	A	G	G	T	G	T	C	A	G	A	C	T	G	C	A	G	G	C	G	T	C	C	A	T	T	G	C		G	A	T	T	C	T	C	A
GLADIO::GERVEX 1652-C1::[IRIS 313-8185]	IRIS 313-8185	IRGC 122061	trop	8	C	G	G	G	C	T	A	A	C	A	G	G	T	G	T	C	A	G	A	C	T	G	C	A	G	G	C	G	T	C	C	A	T	T	G	C	C	G	A	T	T	C	T	C	A
JACINTO::GERVEX 1653-C1::[IRIS 313-8186]	IRIS 313-8186	IRGC 122122	trop	8	C	G	G	G	C	T	A	A	C	A	G	G	T	G	T	C	A	G	A	C	T	G	C	A	G	G	C	G	T	C	C	A	T	T	G	C	C	G	A	T	T	C	T	C	A
L 205::GERVEX 1659-C1::[IRIS 313-8192]	IRIS 313-8192	IRGC 122144	trop	8	C	G	G	G	C	T	A	A	C	A	G	G	T	G	T	C	A	G	A	C	T	G	C	A	G	G	C	G	T	C	C	A	T	T	G	C	C	G	A	T	T	C	T	C	A
LACASSINE::GERVEX 1660-C1::[IRIS 313-8193]	IRIS 313-8193	IRGC 122146	trop	8	C	G	G	G	C	T	A	A	C	A	G	G	T	G	T	C	A	G	A	C	T	G	C	A	G	G	C	G	T	C	C	A	T	T	G	C	C	G	A	T	T	C	T	C	A
REXMONT::GERVEX 1669-C1::[IRIS 313-8202]	IRIS 313-8202	IRGC 122216	trop	8	C	G	G	G	C	T	A	A	C	A	G	G	T	G	T	C	A	G	A	C	T	G	C	A	G	G	C	G	T	C	C	A	T	T	G	C	C	G	A	T	T	C	T	C	A
SALVO::GERVEX 1672-C1::[IRIS 313-8205]	IRIS 313-8205	IRGC 122237	japx	8	C	G	G	G	C	T	A	A	C	A	G	G	T	G	T	C	A	G	A	C	T	G	C	A	G	G	C	G	T	C	C	A	T	T	G	C	C	G	A	T	T	C	T	C	A
KATY::IRGC 77140-1::[IRIS 313-8285]	IRIS 313-8285	IRGC 125614	trop	8	C	G	G	G	C	T	A	A	C	A	G	G	T	G	T	C	A	G	A	C	T	G	C	A	G	G	C	G	T	C	C	A	T	T	G	C	C	G	A	T	T	C	T	C	A
BHADOIA 303::IRGC 6588-1::[IRIS 313-8321]	IRIS 313-8321	IRGC 120894	aus	8	C	G	G	G	C	C	A	A	C	A	G	G	T	G	T	C	A	G	A	C	T	G	C	A	G	G	C	G	T	C	C	A	T	T	G	C	C	G	A	T	T	C	T	C	A
BOND::IRGC 66755-1::[IRIS 313-8339]	IRIS 313-8339	IRGC 125603	trop	8	C	G	G	G	C	T	A	A	C	A	G	G	T	G	T	C	A	G	A	C	T	G	C	A	G	G	C	G	T	C	C	A	T	T	G	C	C	G	A	T	T	C	T	C	A
ARC 10812::IRGC 21074-1::[IRIS 313-8386]	IRIS 313-8386	IRGC 126173	indx	8	C	G	G	G	C	T	A	A	C	A	G	G	T	G	T	C	A	G	A	C	T	G	C	A	G	G	C	G	T	C	C	A	T	T	G	C	C	G	A	T	T	C	T	C	A
KHARSU 80::IRGC 28016-1::[IRIS 313-8398]	IRIS 313-8398	IRGC 121022	aus	7	C	G	G	G	C	C	A	A	C	A	G	G	T	G	T	C	G	G	A	C	T	G	C	A	G	G	C	G	T	C	C	A	T	T	G	C	C	G	A	T	T	T	T	C	A
ARC 18202::IRGC 42328-1::[IRIS 313-8414]	IRIS 313-8414	IRGC 126175	indx	8	C	G	G	G	C	T	A	A	C	A	G	G	T	G	T	C	A	G	A	C	T	G	C	A	G	G	C	G	T	C	C	A	T	T	G	C	C	G	A	T	T	C	T	C	A
TEBONNET::IRGC 66760-1::[IRIS 313-8434]	IRIS 313-8434	IRGC 125625	trop	8	C	G	G	G	C	T	A	A	C	A	G	G	T	G	T	C	A	G	A	C	T	G	C	A	G	G	C	G	T	C	C	A	T	T	G	C	C	G	A	T	T	C	T	C	A
CP 231::IRGC 34018-1::[IRIS 313-8658]	IRIS 313-8658	IRGC 126195	japx	8	C	G	G	G	C	T	A	A	C	A	G	G	T	G	T	C	A	G	A	C	T	G	C	A	G	G	C	G	T	C	C	A	T	T	G	C	C	G	A	T	T	C	T	C	A
LEUANG AWN::IRGC 48257-1::[IRIS 313-8785]	IRIS 313-8785		ind3	8	C	G	G	G	C	T	A	A	C	A	G	G	T	G	T	C	A	G	A	C	T	G	C	A	G	G	C	G	T	C	C	A	T	T	G	C	C	G	A	T	T	C	T	C	A
ARC 10497::[IRIS 313-8813]	IRIS 313-8813	IRGC 117425	aro	5	C	G	G	G	C	C	A	A	C	A	G	G	T	G	T	C	G	G	A	C	T	G	C	A	G	G	C	G	T	C	C	A	T	T	G	C	C	G	A	T	T	C	T	C	A
SHANKA::IRGC 67848-1::[IRIS 313-8814]	IRIS 313-8814	IRGC 121499	aro	5	C	G	G	G	C	C	A	A	C	A		G	T	G	T	C	G	G	A	C	T	G	C	A	G	G	C	G	T	C	C	A	T	T	G	C	C	G	A	T	T	C	T	C	A
CHAKOL::IRGC 77226-1::[IRIS 313-8854]	IRIS 313-8854	IRGC 125696	ind2	8	C	G	G	G	C	T	A	A	C	A	G	G	T	G	T	C	A	G	A	C	T	G	C	A	G	G	C	G	T	C	C	A	T	T	G	C	C	G	A	T	T	C	T	C	A
PADI SEPAH::IRGC 48803-1::[IRIS 313-8865]	IRIS 313-8865	IRGC 126345	trop	8	C	G	G	G	C	T	A	A	C	A	G	G	T	G	T	C	A	G	A	C	T	G	C	A	G	G	C	G	T	C	C	A	T	T	G	C	C	G	A	T	T	C	T	C	A
LEK::IRGC 40199-1::[IRIS 313-8911]	IRIS 313-8911		admix	5	C	G	G	G	C	C	A	A	C	A	G	G	T	G	T	C	G	G	A	C	T	G	C	A	G	G	C	G	T	C	C	A	T	T	G	C	C	G	A	T	T	C	T	C	A
PATALASAFED SUNGHAWADO::IRGC 61133-1::[IRIS 313-8920]	IRIS 313-8920	IRGC 125869	ind2	8	C	G	G	G	C	T	A	A	C	A	G	G	T	G	T	C	A	G	A	C	T	G	C	A	G	G	C	G	T	C	C	A	T	T	G	C	C	G	A	T	T	C	T	C	A
CALIFORNIA BELLE::IRGC 66836-1::[IRIS 313-8923]	IRIS 313-8923	IRGC 125693	trop	8	C	G	G	G	C	T	A	A	C	A	G	G	T	G	T	C	A	G	A	C	T	G	C	A	G	G	C	G	T	C	C	A	T	T	G	C	C	G	A	T	T	C	T	C	A
ARC 11524::IRGC 42672-1::[IRIS 313-8946]	IRIS 313-8946	IRGC 125641	indx	8	C	G	G	G		T	A	A	C	A	G	G	T	G	T	C	A	G	A	C	T	G	C	A	G	G	C	G	T	C	C	A	T	T	G	C	C	G	A	T	T	C	T	C	A
BLUEBONNET::IRGC 1799-1::[IRIS 313-8960]	IRIS 313-8960	IRGC 125688	trop	8	C	G	G	G	C	T	A	A	C	A	G	G	T	G	T	C	A	G	A	C	T	G	C	A	G	G	C	G	T	C	C	A	T	T	G	C	C	G	A	T	T	C	T	C	A
SKY BONNET::IRGC 66759-1::[IRIS 313-8976]	IRIS 313-8976	IRGC 125902	trop	8	C	G	G	G	C	T	A	A	C	A	G	G	T	G	T	C	A	G	A	C	T	G	C	A	G	G	C	G	T	C	C	A	T	T	G	C	C	G	A	T	T	C	T	C	A
ARC 14064::IRGC 41377-1::[IRIS 313-8994]	IRIS 313-8994	IRGC 125649	indx	8	C	G	G	G	C	T	A	A	C	A	G	G	T	G	T	C	A	G	A	C	T	G	C	A	G	G	C	G	T	C	C	A	T	T	G	C	C	G	A	T	T	C	T	C	A
SIGAE::IRGC 66645-1::[IRIS 313-8998]	IRIS 313-8998		trop	8	C	G	G	G	C	T	A	A	C	A	G	G	T	G	T	C	A	G	A	C	T	G	C	A	G	G	C	G	T	C	C	A	T	T	G	C	C	G	A	T	T	C	T	C	A
DHOLA AMAN (LOWLAND AMAN)::IRGC 8341-1::[IRIS 313-9156]	IRIS 313-9156	IRGC 126200	ind2	8	C	G	G	G	C	T	A	A	C	A	G	G	T	G	T	C	A	G	A	C	T	G	C	A	G	G	C	G	T	C	C	A	T	T	G	C	C	G	A	T	T	C	T	C	A
KACIK TARAM::IRGC 35310-1::[IRIS 313-9208]	IRIS 313-9208	IRGC 126165	ind3	8	C	G	G	G	C	T	A	A	C	A	G	G	T	G	T	C	A	G	A	C	T	G	C	A	G	G	C	G	T	C	C	A	T	T	G	C	C	G	A	T	T	C	T	C	A
MAKRO::IRGC 74763-1::[IRIS 313-9258]	IRIS 313-9258	IRGC 126158	ind2	8	C	G	G	G	C	T	A	A	C	A	G	G	T	G	T	C	A	G	A	C	T	G	C	A	G	G	C	G	T	C	C	A	T	T	G	C	C	G	A	T	T	C	T	C	A
BK 26::IRGC 45197-1::[IRIS 313-9348]	IRIS 313-9348	IRGC 125684	ind2	8	C	G	G	G	C	T	A	A	C	A	G	G	T	G	T	C	A	G	A	C	T	G	C	A	G	G	C	G	T	C	C	A	T	T	G	C	C	G	A	T	T	C	T	C	A
MAYBELLE::IRGC 78629-1::[IRIS 313-9363]	IRIS 313-9363	IRGC 125835	trop	8	C	G	G	G	C	T	A	A	C	A	G	G	T	G	T	C	A	G	A	C	T	G	C	A	G	G	C	G	T	C	C	A	T	T	G	C	C	G	A	T	T	C	T	C	A
ARC 18092::IRGC 42256-1::[IRIS 313-9427]	IRIS 313-9427	IRGC 125654	indx	8	C	G	G	G	C	T	A	A	C	A	G	G	T	G	T	C	A	G	A	C	T	G	C	A	G	G	C	G	T	C	C	A	T	T	G	C	C	G	A	T	T	C	T	C	A
B 505 A 1-28-7-1-2::IRGC 6741-1::[IRIS 313-9452]	IRIS 313-9452	IRGC 125661	trop	8	C	G	G	G	C	T	A	A	C	A	G	G	T	G	T	C	A	G	A	C	T	G	C	A	G	G	C	G	T	C	C	A	T	T	G	C	C	G	A	T	T	C	T	C	A
TOURBE::IRGC 47066-1::[IRIS 313-9926]	IRIS 313-9926	IRGC 126162	indx	8	C	G	G	G	C	T	A	A	C	A	G	G	T	G	T	C	A	G	A	C	T	G	C	A	G	G	C	G	T	C	C	A	T	T	G	C	C	G	A	T	T	C	T	C	A
PANNITHI::IRGC 51049-1::[IRIS 313-9949]	IRIS 313-9949	IRGC 126078	trop	4.5	C	G	G	G	C	C	A	A	C	A	G	G	T	G	T	C	G	G	A	C	T	T/G	C	A	G	G	C	G	T	C	C	A	T	T	G	C	C	G	A	T	T	C	T	C	A
PUTTU NELLU::IRGC 55346-1::[IRIS 313-9969]	IRIS 313-9969	IRGC 126989	indx	8	C	G	G	G	C	T	A	A	C	A	G	G	T	G	T	C	A	G	A	C	T	G	C	A	G	G	C	G		C	C	A	T	T	G	C	C	G	A	T	T	C	T	C	A
PLUS::GERVEX 122-C1::[IRIS 313-8046]	IRIS 313-8046	IRGC 122205	trop	8	C	G	G	G	C	T	A	A	C	A	G	G	T	G	T	C	A	G	A	C	T	G	C	A	G	G	C	G	T	C	C	A	T	T	G	C	C	G	A	T	T	C	T	C	A
ALEXANDROS::GERVEX 1678-C1::[IRIS 313-8209]	IRIS 313-8209	IRGC 121962	trop	8	C	G	G	G	C	T	A	A	C	A	G	G	T	G	T	C	A	G	A	C	T	G	C	A	G	G	C	G	T	C	C	A	T	T	G	C	C	G	A	T	T	C	T	C	A
ARC 15063::IRGC 41909-2::[IRIS 313-11276]	IRIS 313-11276	IRGC 132319	indx	7.5	C	G	G	G	C	T	A	A	C	A	G	G	T	G	T	C	A	G	A	C	T	G	C	A	G	G	C	G	T	C	C	A	T	T	G	C	C	G	A	T	T	C	T	C	A
SURMATIYA::IRGC 74779-1::[IRIS 313-8303]	IRIS 313-8303	IRGC 126008	ind2	8	C	G	G	G	C	T	A	A	C	A	G	G	T	G	T	C	A	G	A	C	T	G	C	A	G	G	C	G	T	C	C	A	T	T	G	C	C	G	A	T	T	C	T	C	A
TIMMURAY::IRGC 67857-1::[IRIS 313-8765]	IRIS 313-8765	IRGC 126284	aro	5	C	G	G	G	C	C	A	A	C	A	G	G	T	G	T	C	G	G	A	C	T	G	C	A	G	G	C	G	T	C	C	A	T	T	G	C	C	G	A	T	T	C	T	C	A
UPRH 31::IRGC 61503-1::[IRIS 313-11616]	IRIS 313-11616	IRGC 127878	admix	4.5	C	G	G	G	C	C	A	A	C	A	G	G	T	G	T	C	G	G	A	C	T	G	C	A	G	G	C	G	T	C	C	A	T	T	G	C	C	G	A	T	T	C	T	C	A
80A97YR303-304-1-3::[B053]	B053	IRGC 135819	trop	7	C	G	G	G	C	C/T	A	A	C	A	G	G	T	G	T	C	G/A	G	A	C	T	G	C	A	G	G	C	G	T	C	C	A	T	T	G	C	C	G	A	T	T	C	T	C	A
FORTUNA COLORADO::IRGC 703-1::[IRIS 313-10444]	IRIS 313-10444	IRGC 127371	trop	6.5	C	G	G	G	C	C/T	A	A	C	A	G	G	T	G	T	C	G/A	G	A	C	T	G	C	A	G	G		G	T	C	C	A	T	T	G	C	C	G	A	T	T	C	T	C	A
SA GAE::IRGC 64613-1::[IRIS 313-11687]	IRIS 313-11687	IRGC 132297	ind3	16	C	G	G	G	C	C	A	A	C	G	G	G	T	G	T	C	G	G	G	C	T	G	C	A	G	G	C	G	T	C	G	A	G	T	A	C	C	G	A	T	T	C	T	C	A
RD 19::IRGC 39174-1::[IRIS 313-10147]	IRIS 313-10147		ind3	16	C	G	G	G	C	C	A	A	C	G	G	G	T	G	T	C	G	G	G	C	T	G	C	A	G	G	C	G	T	C	G	A	G	T	A	C	C	G	A	T	T	C	T	C	A
NSIC RC9 (APO)::[CX235]	CX235	IRGC 136013	indx	16	C	G	G	G	C	C	A	A	C	G	G	G	T	G	T	C	G	G	G	C	T	G	C	A	G	G	C	G	T	C	G	A	G	T	A	C	C	G	A	T	T	C	T	C	A
BORIZINA 640::IRGC 68382-1::[IRIS 313-11757]	IRIS 313-11757	IRGC 131972	ind3	15.5	C	G	G	G	C	C	A	A	C	G	G	G	T	G	T	C	G	G	G	C	T	G	C	A	G	G	C	G	T	C	G	A	G	T	A	C	C	G	A	T	T	C	T	C	A
KETAN SERANG::IRGC 14615-1::[IRIS 313-9590]	IRIS 313-9590	IRGC 125799	ind3	16	C	G	G	G	C	C	A	A	C	G	G	G	T	G	T	C	G	G	G	C	T	G	C	A	G	G	C	G	T	C	G	A	G	T	A	C	C	G	A	T	T	C	T	C	A
KA GIL::IRGC 83029-1::[IRIS 313-12080]	IRIS 313-12080	IRGC 127475	ind3	15	C	G	G	G	C	C	A	A	C	G	G	G	T	G	T	C	G	G	A/G	C	T	G	C	A	G	G	C	G	T	C	G	A	T/G	T	A	C	C	G	A	T	T	C	T	C	A
TOG6542::[CX402]	CX402		admix	4	C	G	G	G	C	C	A	A	C	A	G	G	T	G	T	C	G	G	A	C	T	G	C	A	G	G	C	G	T	C	C	A	T	T	G	C	C	G	A	T	T	C	T	C	A
MALOGBANA::IRGC 16086-1::[IRIS 313-10729]	IRIS 313-10729	IRGC 128379	admix	4	C	G	G	G	C	C	A	A	C	A	G	G	T	G	T	C	G	G	A	C	T	G	C	A	G	G	C	G	T	C	C	A	T	T	G	C	C	G	A	T	T	C	T	C	A
KHAO SAHKORN::IRGC 65948-1::[IRIS 313-11707]	IRIS 313-11707	IRGC 132403	ind3	16	C	G	G	G	C	C	A	A	C	G	G	G	T	G	T	C	G	G	G	C	T	G	C	A	G	G	C	G	T	C	G	A	G	T	A	C	C	G	A	T	T	C	T	C	A
CHAO DO::IRGC 89430-1::[IRIS 313-12188]	IRIS 313-12188	IRGC 127260	ind3	16	C	G	G	G	C	C	A	A	C	G	G	G	T	G	T	C	G	G	G	C	T	G	C	A	G	G	C	G	T	C	G	A	G	T	A	C	C	G	A	T	T	C	T	C	A
GABAHSI RASAKI C 90::IRGC 49647-1::[IRIS 313-9197]	IRIS 313-9197	IRGC 126205	ind3	16	C	G	G	G	C	C	A	A	C	G	G	G	T	G	T	C	G	G	G	C	T	G	C	A	G	G	C	G	T	C	G	A	G	T	A	C	C	G	A	T	T	C	T	C	A
BANDI::IRGC 17214-1::[IRIS 313-10762]	IRIS 313-10762	IRGC 127207	ind3	16	C	G	G	G	C	C	A	A	C	G	G	G	T	G	T	C	G	G	G	C	T	G	C	A	G	G	C	G	T	C	G	A	G	T	A	C	C	G	A	T	T	C	T	C	A
LEUANG CHAIYAPHUM::IRGC 78266-1::[IRIS 313-9020]	IRIS 313-9020	IRGC 126983	ind3	16	C	G	G	G	C	C	A	A	C	G	G	G	T	G	T	C	G	G	G	C	T	G	C	A	G	G	C	G	T	C	G	A	G	T	A	C	C	G	A	T	T	C	T	C	A
PONG SANG A::IRGC 29881-2::[IRIS 313-11087]	IRIS 313-11087		ind3	15.5	C	G	G	G	C	C	A	A	C	G	G	G	T	G	T	C	G	G	G	C	T	G	C	A	G	G	C	G	T	C	G	A	T/G	T	A	C	C	G	A	T	T	C	T	C	A
LUYIN 46::[CX304]	CX304	IRGC 135975	indx	16	C	G	G	G	C	C	A	A	C	G	G	G	T	G	T	C	G	G	G	C	T	G	C	A	G	G	C	G	T	C	G	A	G	T	A	C	C	G	A	T	T	C	T	C	A
YN 1353-3::IRGC 117363-1::[IRIS 313-10423]	IRIS 313-10423	IRGC 121160	indx	16	C	G	G	G	C	C	A	A	C	G	G	G	T	G	T	C	G	G	G	C	T	G	C	A	G	G	C	G	T	C	G	A	G	T	A	C	C	G	A	T	T	C	T	C	A
PARN A 191::IRGC 4932-1::[IRIS 313-10506]	IRIS 313-10506		ind3	16	C	G	G	G	C	C	A	A	C	G	G	G	T	G	T	C	G	G	G	C	T	G	C	A	G	G	C	G	T	C	G	A	G	T	A	C	C	G	A	T	T	C	T	C	A
NANG SAU DO::IRGC 26243-1::[IRIS 313-10970]	IRIS 313-10970		ind3	16	C	G	G	G	C	C	A	A	C	G	G	G	T	G	T	C	G	G	G	C	T	G	C	A	G	G	C	G	T	C	G	A	G	T	A	C	C	G	A	T	T	C	T	C	A
MAIRUL::IRGC 27170-1::[IRIS 313-11000]	IRIS 313-11000	IRGC 127591	ind3	16	C	G	G	G	C	C	A	A	C	G	G	G	T	G	T	C	G	G	G	C	T	G	C	A	G	G	C	G	T	C	G	A	G	T	A	C	C	G	A	T	T	C	T	C	A
KYUN TAW SEIN::IRGC 58072-1::[IRIS 313-11543]	IRIS 313-11543	IRGC 127537	ind3	16	C	G	G	G	C	C	A	A	C	G	G	G	T	G	T	C	G	G	G	C	T	G	C	A	G	G	C	G	T	C	G	A	G	T	A	C	C	G	A	T	T	C	T	C	A
KASHMIRI::IRGC 83002-1::[IRIS 313-12079]	IRIS 313-12079		ind3	16	C	G	G	G	C	C	A	A	C	G	G	G	T	G	T	C	G	G	G	C	T	G	C	A	G	G	C	G	T	C	G	A	G	T	A	C	C	G	A	T	T	C	T	C	A
DAMM NOEB THNGORN'::IRGC 87428-1::[IRIS 313-12152]	IRIS 313-12152	IRGC 132398	ind3	15.5	C	G	G	G	C	C	A	A	C	G	G	G	T	G	T	C	G	G	G	C	T	G	C	A	G	G	C	G	T	C	G	A	T/G	T	A	C	C	G	A	T	T	C	T	C	A
IR 57924-24::IRTP 16675-C1::[IRIS 313-7699]	IRIS 313-7699	IRGC 122099	indx	16	C	G	G	G	C	C	A	A	C	G	G	G	T	G	T	C	G	G	G	C	T	G	C	A	G	G	C	G	T	C	G	A	G	T	A	C	C	G	A	T	T	C	T	C	A
NAM SA GUI 19::[IRIS 313-8485]	IRIS 313-8485	IRGC 117536	ind3	16	C	G	G	G	C	C	A	A	C	G	G	G	T	G	T	C	G	G	G	C	T	G	C	A	G	G	C	G	T	C	G	A	G	T	A	C	C	G	A	T	T	C	T	C	A
KHAO PLAH LAI NAK::IRGC 65941-1::[IRIS 313-8870]	IRIS 313-8870		ind3	16	C	G	G	G	C	C	A	A	C	G	G	G	T	G	T	C	G	G	G	C	T	G	C	A	G	G	C	G	T	C	G	A	G	T	A	C	C	G	A	T	T	C	T	C	A
BPI 76 NON SENSITIVE (GREEN)::IRGC 9790-1::[IRIS 313-8903]	IRIS 313-8903	IRGC 120902	ind3	16	C	G	G	G	C	C	A	A	C	G	G	G	T	G	T	C	G	G	G	C	T	G	C	A	G	G	C	G	T	C	G	A	G	T	A	C	C	G	A	T	T	C	T	C	A
KUOL DAUN THNONG::IRGC 22986-1::[IRIS 313-10905]	IRIS 313-10905		ind3	8	C	G	G	G	C	T	A	A	C	A	G	G	T	G	T	C	A	G	A	C	T	G	C	A	G	G	C	G	T	C	C	A	T	T	G	C	C	G	A	T	T	C	T	C	A
CAMPECHE A 79::IRGC 51102-1::[IRIS 313-11437]	IRIS 313-11437	IRGC 127246	ind1B	16	C	G	G	G	C	C	A	A	C	G	G	G	T	G	T	C	G	G	G	C	T	G	C	A	G	G	C	G	T	C	G	A	G	T	A	C	C	G	A	T	T	C	T	C	A
QINGKE::[B164]	B164		aus	4.5	C	G	G	G	C	C	A	A	C	A	G/T	G	T	G	T	C	G	G	A	C	T	G	C	A	G	G	C	G	T	C	C	A	T	T	G	C	C	G	A	T	T	C	T	C	A
RP 1570-44-1::[B187]	B187	IRGC 136035	indx	5	C	G	G	G	C	C	A	A	C	A	G/T	G	T	G	T	C	G	G	A	C	T	G	C	A	G	G	C	G	T	C	C	A	T	T	G	C/G	C	G	A	T	T	C	T	C	A
HUHUI 91269::[B243]	B243	IRGC 135910	aus	5	C	G	G	G	C	C	A	A	C	A	T	G	T	G	T	C	G	G	A	C	T	G	C	A	G	G	C	G	T	C	C	A	T	T	G	C	C	G	A	T	T	C	T	C	A
GAJALE::[CX128]	CX128	IRGC 135889	indx	5	C	G	G	G	C	C	A	A	C	A	T	G	T	G	T	C	G	G	A	C	T	G	C	A	G	G		G	T	C	C	A	T	T	G	C	C	G	A	T	T	C	T	C	A
ZALE::[CX131]	CX131	IRGC 136087	ind1A	5	C	G	G	G	C	C	A	A	C	A	T	G	T	G	T	C	G	G	A	C	T	G	C	A	G	G	C	G	T	C	C	A	T	T	G	C	C	G	A	T	T	C	T	C	A
TN1::[CX162]	CX162		ind1A	5	C	G	G	G	C	C	A	A	C	A	T	G	T	G	T	C	G	G	A	C	T	G	C	A	G	G	C	G	T	C	C	A	T	T	G	C	C	G	A	T	T	C	T	C	A
IET1444::[CX267]	CX267	IRGC 135914	indx	5	C	G	G	G	C	C	A	A	C	A	T	G	T	G	T	C	G	G	A	C	T	G	C	A	G	G	C	G	T	C	C	A	T	T	G	C	C	G	A	T	T	C	T	C	A
42686::[CX364]	CX364		ind1B	5	C	G	G	G	C	C	A	A	C	A	T	G	T	G	T	C	G	G	A	C	T	G	C	A	G	G	C	G	T	C	C	A	T	T	G	C	C	G	A	T	T	C	T	C	A
EX MARABA GURUKU::IRGC 69582-1::[IRIS 313-10047]	IRIS 313-10047	IRGC 125737	ind1A	5	C	G	G	G	C	C	A	A	C		T	G	T	G	T	C	G	G	A	C	T	G	C	A	G	G	C	G	T	C	C	A	T	T	G	C	C	G	A	T	T	C	T	C	A
TON ROO SHUN::IRGC 4572-1::[IRIS 313-10502]	IRIS 313-10502	IRGC 127865	ind1A	5	C	G	G	G	C	C	A	A	C	A	T	G	T	G	T	C	G	G	A	C	T	G	C	A	G	G	C	G	T	C	C	A	T	T	G	C	C	G	A	T	T	C	T	C	A
HAM MOON::IRGC 9135-2::[IRIS 313-10614]	IRIS 313-10614	IRGC 128049	indx	5	C	G	G	G	C	C	A	A	C	A	T	G	T	G	T	C	G	G	A	C	T	G	C	A	G	G	C	G	T	C	C	A	T	T	G	C	C	G	A	T	T	C	T	C	A
KH 998::IRGC 16948-2::[IRIS 313-10754]	IRIS 313-10754	IRGC 128081	indx	5	C	G		G	C	C	A	A	C	A	T	G	T	G	T	C	G	G	A	C	T	G	C	A	G	G	C	G	T	C	C	A	T	T	G	C		G	A	T	T	C	T	C	A
RANDA KUNING::IRGC 18595-1::[IRIS 313-10807]	IRIS 313-10807		ind3	5	C	G	G	G		C	A	A	C	A	T	G	T	G	T	C	G	G	A	C	T	G	C	A	G	G	C	G	T	C	C	A	T	T	G	C	C	G	A	T	T	C	T	C	A
ARC 12867::IRGC 22401-1::[IRIS 313-10891]	IRIS 313-10891	IRGC 127148	aus	5	C	G	G	G	C	C	A	A	C	A	T	G	T	G	T	C	G	G	A	C	T	G	C	A	G	G	C	G	T	C	C	A	T	T	G	C	C	G	A	T	T	C	T	C	A
ARC 13204::IRGC 22558-1::[IRIS 313-10894]	IRIS 313-10894	IRGC 127150	admix	5	C	G	G	G	C	C	A	A	C	A	T	G	T	G	T	C	G	G	A	C	T	G	C	A	G	G	C	G	T	C	C	A	T	T	G	C	C	G	A	T	T	C	T	C	A
ARC 13276::IRGC 22622-2::[IRIS 313-10896]	IRIS 313-10896	IRGC 127946	admix	5	C	G	G	G	C	C	A	A	C	A	T	G	T	G	T	C	G	G	A	C	T	G	C	A	G	G	C	G	T	C	C	A	T	T	G	C	C	G	A	T	T	C	T	C	A
SYNTHETIC SATIVA::IRGC 36842-2::[IRIS 313-11199]	IRIS 313-11199	IRGC 128176	indx	5	C	G	G	G	C	C	A	A	C	A	T	G	T	G	T	C	G	G	A	C	T	G	C	A	G	G	C	G	T	C	C	A	T	T	G	C	C	G	A	T	T	C	T	C	A
B 737 G-KN-23-1::IRGC 39203-2::[IRIS 313-11239]	IRIS 313-11239	IRGC 127978	indx	5	C	G	G	G	C	C	A	A	C	A	T	G	T	G	T	C	G	G	A	C	T	G	C	A	G	G	C	G	T	C	C	A	T	T	G	C	C	G	A	T	T	C	T	C	A
MR 136-1::IRGC 50707-1::[IRIS 313-11433]	IRIS 313-11433	IRGC 127635	ind1A	5	C	G	G	G	C	C	A	A	C	A	T	G	T	G	T	C	G	G	A	C	T	G	C	A	G	G	C	G	T	C	C	A	T	T	G	C	C	G	A	T	T	C	T	C	A
TAI ZHOU XIAN::IRGC 59912-1::[IRIS 313-11580]	IRIS 313-11580	IRGC 127840	indx	5	C	G	G	G	C	C	A	A	C	A	T	G	T	G	T	C	G	G	A	C	T	G	C	A	G	G	C	G	T	C	C	A	T	T	G	C	C	G	A	T	T	C	T	C	A
PJ 110::IRGC 68981-1::[IRIS 313-11763]	IRIS 313-11763	IRGC 127734	indx	5	C	G	G	G	C	C	A	A	C	A	T	G	T	G	T	C	G	G	A	C	T	G	C	A	G	G	C	G	T	C	C	A	T	T	G	C	C	G	A	T	T	C	T	C	A
DU GEN CHUAN::IRGC 70083-1::[IRIS 313-11796]	IRIS 313-11796	IRGC 127345	ind1A	5	C	G	G	G	C	C	A	A	C	A	T	G	T	G	T	C	G	G	A	C	T	G	C	A	G	G	C	G	T	C	C	A	T	T	G	C	C	G	A	T	T	C	T	C	A
MALIKULI::IRGC 76237-1::[IRIS 313-11945]	IRIS 313-11945	IRGC 127598	ind2	4	C	G	G	G	C	C	A	A	C	A	G	G	T	G	T	C	G	G	A	C	T	G	C	A	G	G	C	G	T	C	C	A	T	T	G	C	C	G	A	T	T	C	T	C	A
KAGIOS PUTI::IRGC 76965-1::[IRIS 313-11959]	IRIS 313-11959	IRGC 135756	ind3	5	C	G	G	G	C	C	A	A	C	A	T	G	T	G	T	C	G	G	A	C	T	G	C	A	G	G	C	G	T	C	C	A	T	T	G	C	C	G	A	T	T	C	T	C	A
IR 55411-50::IRTP 16682-C1::[IRIS 313-7696]	IRIS 313-7696	IRGC 124394	indx	5	C	G	G	G	C	C	A	A	C	A	T	G	T	G	T	C	G	G	A	C	T	G	C	A	G	G	C	G	T	C	C	A	T	T	G	C	C	G	A	T	T	C	T	C	A
IR 57920-AC 25-2-B::C1::[IRIS 313-7698]	IRIS 313-7698	IRGC 122098	indx	5	C	G	G	G	C	C	A	A	C	A	T	G	T	G	T	C	G	G	A	C	T	G	C	A	G	G	C	G	T	C	C	A	T	T	G	C	C	G	A	T	T	C	T	C	A
ARIANA::GERVEX 396-C1::[IRIS 313-8069]	IRIS 313-8069	IRGC 121966	indx	5	C	G	G	G	C	C	A	A	C	A	T	G	T	G	T	C	G	G	A	C	T	G	C	A	G	G	C	G	T	C	C	A	T	T	G	C	C	G	A	T	T	C	T	C	A
A 201::GERVEX 1638-C1::[IRIS 313-8173]	IRIS 313-8173	IRGC 121959	trop	5	C	G	G	G	C	C	A	A	C	A	T	G	T	G	T	C	G	G	A	C	T	G	C	A	G	G	C	G	T	C	C	A	T	T	G	C	C	G	A	T	T	C	T	C	A
GIZA 178::GERVEX 1681-C1::[IRIS 313-8212]	IRIS 313-8212	IRGC 122060	indx	5	C	G	G	G	C	C	A	A	C	A	T	G	T	G	T	C	G	G	A	C	T	G	C	A	G	G	C	G	T		C	A	T	T	G	C	C	G	A	T	T	C	T	C	A
KETAN KUNANG KUNENG::IRGC 48730-1::[IRIS 313-8831]	IRIS 313-8831		ind3	5	C	G	G	G	C	C	A	A	C	A	T	G	T	G	T	C	G	G	A	C	T	G	C	A	G	G	C	G	T	C	C	A	T	T	G	C	C	G	A	T	T	C	T	C	A
TSAI YUAN CHON::IRGC 126-1::[IRIS 313-9708]	IRIS 313-9708	IRGC 125928	ind1A	5	C	G	G	G	C	C	A	A	C	A	T	G	T	G	T	C	G	G	A	C	T	G	C	A	G	G		G	T	C	C	A	T	T	G	C	C	G	A	T	T	C	T	C	A
KN 1 B 361-1-8-6-9::IRGC 46974-1::[IRIS 313-9924]	IRIS 313-9924	IRGC 125805	indx	5	C	G	G	G	C	C	A	A	C	A	T	G	T	G	T	C	G	G	A	C	T	G	C	A	G	G	C	G	T	C	C	A	T	T	G	C	C	G	A	T	T	C	T	C	A
DUD KUNING::IRGC 44-1::[IRIS 313-9533]	IRIS 313-9533	IRGC 125729	ind3	16	C	G	G	G	C	C	A	A	C	G	G	G	T	G	T	C	G	G	G	C	T	G	C	A	G	G	C	G	T	C	G	A	G	T	A	C	C	G	A	T	T	C	T	C	A
KHAO GAHB BUA::IRGC 74937-1::[IRIS 313-11921]	IRIS 313-11921	IRGC 132401	ind3	15.5	C	G	G	G	C	C	A	A	C	G	G	G	T	G	T	C	G	G	G	C	T	G	C	A	G	G	C	G	T	C	G	A	T/G	T	A	C	C	G	A	T	T	C	T	C	A
PULUT PUTIH::IRGC 27426-1::[IRIS 313-11010]	IRIS 313-11010	IRGC 127750	ind3	16	C	G	G	G	C	C	A	A	C	G	G	G	T	G	T	C	G	G	G	C	T	G	C	A	G	G	C	G	T	C	G	A	G	T	A	C	C	G	A	T	T	C	T		A
YODAYA::IRGC 33901-2::[IRIS 313-11149]	IRIS 313-11149	IRGC 128204	ind3	16	C	G	G	G	C		A	A	C	G	G	G	T	G	T	C	G	G	G	C	T	G	C	A	G	G	C	G	T	C	G	A	G	T	A	C	C	G	A	T	T	C	T	C	A
C 166-135::IRGC 50633-1::[IRIS 313-11431]	IRIS 313-11431	IRGC 127244	ind3	16	C	G	G	G	C	C	A	A	C	G	G	G	T	G	T	C	G	G	G	C	T	G	C	A	G	G	C	G	T	C	G	A	G	T	A	C	C	G	A	T	T	C	T	C	A
NEANG MINH TONN::IRGC 75366-2::[IRIS 313-11936]	IRIS 313-11936		ind3	16	C	G	G	G	C	C	A	A	C	G	G	G	T	G	T	C	G	G	G	C	T	G	C	A	G	G	C	G	T	C	G	A	G	T	A	C	C	G	A	T	T	C	T	C	A
CHAO LAO SOUNG::IRGC 78799-1::[IRIS 313-11992]	IRIS 313-11992	IRGC 127266	ind3	16	C	G	G	G	C	C	A	A	C	G	G	G	T	G	T	C	G	G	G	C	T	G	C	A	G	G	C	G	T	C	G	A	G	T	A	C	C	G	A	T	T	C	T	C	A
CT 9506-18-7-1T-2::IRGC 116973-1::[IRIS 313-10300]	IRIS 313-10300	IRGC 125960	indx	15	C	G	G	G	C	C	A	A	C	G	G	G	T	G	T	C	G	G	G	C	T	G	C	A	G	G	C	G	T	C	C/G	A	G	T	G/A	C	C	G	A	T	T	C	T	C	A
KARISHNABELI::IRGC 61979-1::[IRIS 313-11628]	IRIS 313-11628	IRGC 127494	admix	6	C	G	G	G	C	C/T	A	A	C	A	G	G	T	G	T	C		G	A	C	T	G	C	A	G	G	C	G	T	C	C	A	T	T	G	C	C	G	A	T	T	C	T	C	A
SAWNG RUANG::IRGC 48458-2::[IRIS 313-11393]	IRIS 313-11393	IRGC 132267	ind3	16	C	G	G	G	C	C	A	A	C	G	G	G	T	G	T	C	G	G	G	C	T	G	C	A	G	G	C	G	T	C	G	A	G	T	A	C	C	G	A	T	T	C	T	C	A
CHON::IRGC 78776-1::[IRIS 313-11991]	IRIS 313-11991	IRGC 127282	ind3	16	C	G	G	G	C	C	A	A	C	G	G	G	T	G	T	C	G	G	G	C	T	G	C	A	G	G		G	T	C	G	A	G	T	A	C	C	G	A	T	T	C	T	C	A
IR 45427-2B-2-2B-1-1::G1::[IRIS 313-15899]	IRIS 313-15899	IRGC 126961	indx	8	C	G	G	G	C	T	A	A	C	A	G	G	T	G	T	C	A	G	A	C	T	G	C	A	G	G	C	G	T	C	C	A	T	T	G	C	C	G	A	T	T	C	T	C	A
BEGUM::IRGC 33990-1::[IRIS 313-9641]	IRIS 313-9641	IRGC 125602	aus	6	C	G	G	G	C	C	A	A	C	A	G	G	T	G	T	C	G	G	A	C	T	G	C	A	G	G	C	G	T	C	C	A	T	T	G	C	C	G	A	T	T	T	T	C	A
KAILUNDO::IRGC 7859-2::[IRIS 313-10574]	IRIS 313-10574	IRGC 132253	indx	12	C	G	G	G	C	C	A	A	C	G	G	G	C	G	T	C	A	G	A	C	T	G	C	A	G	G	C	G	T	C	C	G	T	T	A	C	C	G	A	T	T	C	T	C	A
RANGOON SAMBA::IRGC 11940-1::[IRIS 313-9832]	IRIS 313-9832	IRGC 125883	ind2	6	C	G	G	G	C	C	A	A	C	A	G	G	T	G	T	C	G	G	A	C	T	G	C	A	G	G	C		T	C	C	A	T	T	G	C	C	G	A	T	T	C	T	C	A
E 21::IRGC 33929-2::[IRIS 313-11151]	IRIS 313-11151	IRGC 128035	ind3	14	C	G	G	G	C	C	A	A	C	G	G	G	C	A	T	C	A	G	A	C	T	G	C	A	G	G	C	G	T	C	C	G	T	T	A	C	C	G	A	T	T	C	T	C	A
IR 10120-7-2-1-4::IRGC 78628-1::[IRIS 313-11987]	IRIS 313-11987	IRGC 127433	indx	16	C	G	G	G	C	C	A	A	C	G	G	G	T	G	T	C	G	G	G	C	T	G	C	A	G	G	C	G	T	C	G	A	G	T	A	C	C	G	A	T	T	C	T	C	A
KHAYANGYA D 34-181::IRGC 5861-2::[IRIS 313-10518]	IRIS 313-10518	IRGC 128088	indx	14	C	G	G	G	C	C	A	A	C	G	G	G	C	G	G	T	A	G	A	C	T	G	C	A	G	G	C	G	T	C	C	G	T	T	A	C	C	G	A	T	T	C	T	C	A
KONG MARETH 4 T 1::IRGC 7248-1::[IRIS 313-10557]	IRIS 313-10557	IRGC 135764	ind3	16	C	G	G	G	C	C	A	A	C	G	G	G	T	G	T	C	G	G	G	C	T	G	C	A	G	G	C	G	T	C	G	A	G	T	A	C	C	G	A	T	T	C	T	C	A
KAYANGYA D 402::IRGC 7927-2::[IRIS 313-10575]	IRIS 313-10575	IRGC 128074	indx	14	C	G	G	G	C	C	A	A	C	G	G	G	C	G	G	T	A	G	A	C	T	G	C	A	G	G	C	G	T	C	C	G	T	T	A	C	C	G	A	T	T	C	T	C	A
GHAIYA::IRGC 16286-1::[IRIS 313-10737]	IRIS 313-10737	IRGC 128297	aus	7	C	G	G	C	C	C	A	A	C	G	G	G	T	G	T	C	G	G	A	C	T	G	C	A	G	G	C	G	T	C	C	A	T	T	G	C	C	G	A	T	T	C	T	C	A
BUKU::IRGC 28683-2::[IRIS 313-11044]	IRIS 313-11044	IRGC 128005	trop	14	C	G	G	G	C	C	A	A	C	G	G	G	C	G	G	T	A	G	A	C	T	G	C	A	G	G	C	G	T	C	C	G	T	T	A	C	C	G	A	T	T	C	T	C	A
ARC 14299::IRGC 42889-2::[IRIS 313-11299]	IRIS 313-11299	IRGC 127954	indx	14	C	G	G	G	C	C	A	A	C	G	G	G	C	G	G	T	A	G	A	C	T	G	C	A	G	G	C	G	T	C	C	G	T	T	A	C	C	G	A	T	T	C	T	C	A
SIA MOO::IRGC 64629-1::[IRIS 313-11688]	IRIS 313-11688	IRGC 135581	ind3	16	C	G	G	G	C	C	A	A	C	G	G	G	T	G	T	C	G	G	G	C	T	G	C	A	G	G	C	G	T	C	G	A	G	T	A	C	C	G	A	T	T	C	T	C	A
B 6144-MR-6-0-0::C1::[IRIS 313-7641]	IRIS 313-7641	IRGC 121974	indx	16	C	G	G	G	C	C	A	A	C	G	G	G	T	G	T	C	G	G	G	C	T	G	C	A	G	G	C	G	T	C	G	A	G	T	A	C	C	G	A	T	T	C	T	C	A
ARC 13934::IRGC 41325-2::[IRIS 313-11264]	IRIS 313-11264	IRGC 132241	indx	13.5	C	G	G	G	C	C	A	A	C	G	G	G	C	G	G	T	A	G	A	C	T	T/G	C	A	G	G	C	G	T	C	C	G	T	T	A	C	C	G	A	T	T	C	T	C	A
ARC 18533::IRGC 51756-1::[IRIS 313-11443]	IRIS 313-11443	IRGC 127161	indx	14	C	G	G	G	C	C	A	A	C	G	G	G	C	G	G	T	A	G	A	C	T	G	C	A	G	G	C	G	T	C	C	G	T	T	A	C	C	G	A	T	T	C	T	C	A
ARC 11857::IRGC 40972-1::[IRIS 313-9560]	IRIS 313-9560	IRGC 125643	indx	14	C	G	G	G	C	C	A	A	C	G	G	G	C	G	G	T	A	G	A	C	T	G	C	A	G	G	C	G	T	C	C	G	T	T	A	C	C	G	A	T	T	C	T	C	A
ARC 15873::IRGC 43250-1::[IRIS 313-9634]	IRIS 313-9634	IRGC 125653	indx	14	C	G	G	G	C	C	A	A	C	G	G	G	C	G	G	T	A	G	A	C	T	G	C	A	G	G	C	G	T	C	C	G	T	T	A	C	C	G	A	T	T	C	T	C	A
BAZAIL 975::IRGC 32816-2::[IRIS 313-11123]	IRIS 313-11123	IRGC 127990	aus	13	C	G	G	G	C	C	A	A	C	G	G	G	C	G	T	C	A	G	A	C	T	G	G	A	G	G	C	G	T	C	C	G	T	T	A	C	C	G	A	T	T	C	T	C	A
KALAR KAR::IRGC 49737-2::[IRIS 313-11413]	IRIS 313-11413	IRGC 132420	aus	2	C	G	G	G	C	C	A	A	C	A	G	G	T	G	T	C	G	G	A	C	T	T	C	A	G	G	C	G	T	C	C	A	T	T	G	C	C	G	A	T	T	C	T	C	A
C 28-16::IRGC 49580-1::[IRIS 313-11410]	IRIS 313-11410	IRGC 132393	indx	2	C	G	G	G	C	C	A	A	C	A	G	G	T	G	T	C	G	G	A	C	T	T	C	A	G	G	C	G	T	C	C	A	T	T	G	C	C	G	A	T	T	C	T	C	A
CODE NO 31225::IRGC 46865-2::[IRIS 313-11375]	IRIS 313-11375	IRGC 128018	aro	5	C	G	G	G	C	C/T	A	A	C	A	G	G	T	G	T	C	G/A	G	A	C	T	T/G	C	A	G	G	C	G	T	C	C	A	T	T	G	C	C	G	A	T	T	C	T	C	A
QIUGUANGTENGXI 104::[B004]	B004	IRGC 136031	temp	0	C	G	G	G	C	C	A	A	C	A	G	G	T	G	T	C	G	G	A	C	T	T	C	A	G	G	C	A	T	C	C	A	T	T	G	C	C	G	A	T	T	C	T	C	A
WANSHI::[B005]	B005	IRGC 136067	temp	0	C	G	G	G	C	C	A	A	C	A	G	G	T	G	T	C	G	G	A	C	T	T	C	A	G	G	C	A	T	C	C	A	T	T	G	C	C	G	A	T	T	C	T	C	A
CO 22::[B011]	B011	IRGC 135870	indx	4	C	G	G	G	C	C	A	A	C	A	G	G	T	G	T	C	G	G	A	C	T	G	C	A	G	G	C	G	T	C	C	A	T	T	G	G	C	G	A	T	T	C	T	C	A
2037(RAJAHAMSAL)::[B012]	B012	IRGC 135815	ind2	3.5	C	G	G	G	C	C	A	A	C	A	G	G	T	G	T	C	G	G	A	C	T	G	C	A	G	G	C	G	T	C	C	A	T	T	G	C/G	C	G	A	T	T	C	T	C	A
AERJITUO::[B017]	B017	IRGC 135822	temp	0	C	G	G	G	C	C	A	A	C	A	G	G	T	G	T	C	G	G	A	C	T	T	C	A	G	G	C	A	T	C	C	A	T	T	G	C	C	G	A	T	T	C	T	C	A
SELN 244A6-20::[B021]	B021	IRGC 136044	indx	3	C	G	G	G	C	C	A	A	C	A	G	G	T	G	T	C	G	G	A	C	T	G	C	A	G	G	C	G	T	C	C	A	T	T	G	C	C	G	A	T	T	C	T	C	A
DJANDA MANDJA::[B025]	B025	IRGC 135881	trop	3	C	G	G	G	C	C	A	A	C	A	G	G	T	G	T	C	G	G	A	C	T		C	A	G	G	C	G	T	C	C	A	T	T	G	C	C	G	A	T	T	C	T	C	A
PADI LADANG ASE POLO KOMEK::[B026]	B026	IRGC 136017	indx	4	C	G	G	G	C	C	A	A	C	A	G	G	T	G	T	C	G	G	A	C	T	G	C	A	G	G	C	G	T	C	C	A	T	T	G	G	C	G	A	T	T	C	T	C	A
C 894-21::[B027]	B027	IRGC 135858	ind3	3	C	G	G	G	C	C	A	A	C	A	G	G	T	G	T	C	G	G	A	C	T	G	C	A	G	G	C	G	T	C	C	A	T	T	G	C	C	G	A	T	T	C	T	C	A
ROHINI::[B032]	B032	IRGC 136034	ind1B	4	C	G	G	G	C	C	A	A	C	A	G	G	T	G	T	C	G	G	A	C	T	G	C	A	G	G	C	G	T	C	C	A	T	T	G	G	C	G	A	T	T	C	T	C	A
K 24::[B040]	B040	IRGC 135962	indx	3	C	G	G	G	C	C	A	A	C	A	G	G	T	G	T	C	G	G	A	C	T	G	C	A	G	G	C	G	T	C	C	A	T	T	G	C	C	G	A	T	T	C	T	C	A
YR 83-23-11::[B043]	B043	IRGC 136081	trop	3	C	G	G	G	C	C	A	A	C	A	G	G	T	G	T	C	G	G	A	C	T	T	C	A	G	G	C	G	T	C	C	A	T	T	G	C	C	G	A	T	T	C	T	C	A
CISOKAN::[B048]	B048	IRGC 135868	ind1B	4	C	G	G	G	C	C	A	A	C	A	G	G	T	G	T	C	G	G	A	C	T	G	C	A	G	G	C	G	T	C	C	A	T	T	G	G	C	G	A	T	T	C	T	C	A
ZACAODAO 13::[B049]	B049	IRGC 136086	aus	3	C	G	G	G	C	C	A	A	C	A	G	G	T	G	T	C	G	G	A	C	T	G	C	A	G	G	C	G	T	C	C	A	T	T	G	C	C	G	A	T	T	C	T	C	A
J34::[B052]	B052	IRGC 135949	ind2	3	C	G	G	G	C	C	A	A	C	A	G	G	T	G	T	C	G	G	A	C	T	G	C	A	G	G	C	G	T	C	C	A	T	T	G	C	C	G	A	T	T	C	T	C	A
TIEGANWU::[B056]	B056		temp	3	C	G	G	G	C	C	A	A	C	A	G	G	T	G	T	C	G	G	A	C	T	T	C	A	G	G	C	G	T	C	C	A	T	T	G	C	C	G	A	T	T	C	T	C	A
XIUSHUI 115::[B057]	B057		temp	0	C	G	G	G	C	C	A	A	C	A	G	G	T	G	T	C	G	G	A	C	T	T	C	A	G	G	C	A	T	C	C	A	T	T	G	C	C	G	A	T	T	C	T	C	A
GUANGKEXIANGNUO::[B066]	B066		temp	0	C	G	G	G	C	C	A	A	C	A	G	G	T	G	T	C	G	G	A	C	T	T	C	A	G	G	C	A	T	C	C	A	T	T	G	C	C	G	A	T	T	C	T	C	A
GAOYANGDIANDAO DAHONGMANG::[B068]	B068		temp	0	C	G	G	G	C	C	A	A	C	A	G	G	T	G	T	C	G	G	A	C	T	T	C	A	G	G	C	A	T	C	C	A	T	T	G	C	C	G	A	T	T	C	T	C	A
DANDONGLUDAO::[B069]	B069		japx	2.5	C	G	G	G	C	C	A	A	C	A	G	G	T	G	T	C	G	G	A	C	T	T	C	A	G	G	C	G	T	C	C	A	T	T	G	C	C	G	A	T	T	C	T	C	A
LAOGUANGTOU 83::[B070]	B070		japx	3	C	G	G	G	C	C	A	A	C	A	G	G	T	G	T	C	G	G	A	C	T	T	C	A	G	G	C	G	T	C	C	A	T	T	G	C	C	G	A	T	T	C	T	C	A
MUXIQIU::[B071]	B071		temp	3	C	G	G	G	C	C	A	A	C	A	G	G	T	G	T	C	G	G	A	C	T	T	C	A	G	G	C	G	T	C	C	A	T	T	G	C	C	G	A	T	T	C	T	C	A
MUGUANUO::[B086]	B086		admix	3	C	G	G	G	C	C	A	A	C	A	G	G	T	G	T	C	G	G	A	C	T	G	C	A	G	G	C	G	T	C	C	A	T	T	G	C	C	G	A	T	T	C	T	C	A
JINZHINUO4::[B096]	B096		indx	3	C	G	G	G	C	C	A	A	C	A	G	G	T	G	T	C	G	G	A	C	T	G	C	A	G	G	C	G	T	C	C	A	T	T	G	C	C	G	A	T	T	C	T	C	A
JIIENUO::[B097]	B097		indx	3	C	G	G	G	C	C	A	A	C	A	G	G	T	G	T	C	G	G	A	C	T	G	C	A	G	G	C	G	T	C	C	A	T	T	G	C	C	G	A	T	T	C	T	C	A
HONGKEZHENUO::[B100]	B100		temp	3	C	G	G	G	C	C	A	A	C	A	G	G	T	G	T	C	G	G	A	C	T	T	C	A	G	G	C	G	T	C	C	A	T	T	G	C	C	G	A	T	T	C	T	C	A
MAGUZI::[B102]	B102		temp	0	C	G	G	G	C	C	A	A	C	A	G	G	T	G	T	C	G	G	A	C	T	T	C	A	G	G	C	A	T	C	C	A	T	T	G	C	C	G	A	T	T	C	T	C	A
HUANGPINUO::[B110]	B110		temp	3	C	G	G	G	C	C	A	A	C	A	G	G	T	G	T	C	G	G	A	C	T	T	C	A	G	G	C	G	T	C	C	A	T	T	G	C	C	G	A	T	T	C	T	C	A
ZIMANGFEIE::[B111]	B111		temp	3	C	G	G	G	C	C	A	A	C	A	G	G	T	G	T	C	G	G	A	C	T	T	C	A	G	G	C	G	T	C	C	A	T	T	G	C	C	G	A	T	T	C	T	C	A
SHUFENG 101::[B116]	B116		indx	3	C	G	G	G	C	C	A	A	C	A	G	G	T	G	T	C	G	G	A	C	T	G	C	A	G	G	C	G	T	C	C	A	T	T	G	C	C	G	A	T	T	C	T	C	A
LIXINGENG::[B117]	B117		temp	2	C	G	G	G	C	C	A	A	C	A	G	G	T	G	T	C	G	G	A	C	T	T	C	A	G	G	C	G	T	C	C	A	T	T	G	C	C	G	A	T	T	C	T	C	A
BAIKEHANHE::[B147]	B147		ind1A	2.5	C	G	G	G	C	C	A	A	C	A	G	G	T	G	T	C	G	G	A	C	T	T/G	C	A	G	G	C	G	T	C	C	A	T	T	G	C	C	G	A	T	T	C	T	C	A
LENGSHUINUO::[B148]	B148		japx	0	C	G	G	G	C	C	A	A	C	A	G	G	T	G	T	C	G	G	A	C	T	T	C	A	G	G	C	A	T	C	C	A	T	T	G	C	C	G	A	T	T	C	T	C	A
BAOXIE-7B::[B155]	B155		indx	3	C	G	G	G	C	C	A	A	C	A	G	G	T	G	T	C	G	G	A	C	T		C	A	G	G	C	G	T	C	C	A	T	T	G	C	C	G	A	T	T	C	T	C	A
SHUIYUAN 300LI::[B160]	B160		temp	0	C	G	G	G	C	C	A	A	C	A	G	G	T	G	T	C	G	G	A	C	T	T	C	A	G	G	C	A	T	C	C	A	T	T	G	C	C	G	A	T	T	C	T	C	A
YELICANGHUA::[B161]	B161		temp	1.5	C	G	G	G	C	C	A	A	C	A	G	G	T	G	T	C	G	G	A	C	T	T	C	A	G	G	C	A/G	T	C	C	A	T	T	G	C	C	G	A	T	T	C	T	C	A
BAIGEDAO::[B162]	B162		temp	3	C	G	G	G	C	C	A	A	C	A	G	G	T	G	T	C	G	G	A	C	T	T	C	A	G	G	C	G	T	C	C	A	T	T	G	C	C	G	A	T	T	C	T	C	A
HAOHUANGLA::[B165]	B165		indx	3	C	G	G	G	C	C	A	A	C	A	G	G	T	G	T	C	G	G	A	C	T	G	C	A	G	G	C	G	T	C	C	A	T	T	G	C	C	G	A	T	T	C	T	C	A
JIANGHUADAO::[B166]	B166	IRGC 135953	temp	0	C	G	G	G	C	C	A	A	C	A	G	G	T	G	T	C	G	G	A	C	T	T	C	A	G	G	C	A	T	C	C	A	T	T	G	C	C	G	A	T	T	C	T	C	A
QINGJINZAOSHENG::[B167]	B167	IRGC 136029	temp	0	C	G	G	G	C	C	A	A	C	A	G	G	T	G	T	C	G	G	A	C	T	T	C	A	G	G	C	A	T	C	C	A	T	T	G	C	C	G	A	T	T	C	T	C	A
AILUYU::[B169]	B169		temp	0	C	G	G	G	C	C	A	A	C	A	G	G	T	G	T	C	G	G	A	C	T	T	C	A	G	G	C	A	T	C	C	A	T	T	G	C	C	G	A	T	T	C	T	C	A
HONGSE 90::[B170]	B170	IRGC 135905	temp	0	C	G	G	G	C	C	A	A	C	A	G	G	T	G	T	C	G	G	A	C	T	T	C	A	G	G	C		T	C	C	A	T	T	G	C	C	G	A	T	T	C	T	C	A
KELUODUO B::[B179]	B179	IRGC 135966	temp	3	C	G	G	G	C	C	A	A	C	A	G	G	T	G	T	C	G	G	A	C	T	T	C	A	G	G	C	G	T	C	C	A	T	T	G	C	C	G	A	T	T	C	T	C	A
CHIMAO::[B182]	B182		temp	0	C	G	G	G	C	C	A	A	C	A	G	G	T	G	T	C	G	G	A	C	T	T	C	A	G	G	C	A	T	C	C	A	T	T	G	C	C	G	A	T	T	C	T	C	A
IRAT 36::[B188]	B188	IRGC 135944	trop	1	C	G	G	G	C	C	A	A	T	A	G	G	T	G	T	C	G	G	A	C	T	T	C	A	G	G	C	A	T	C	C	A	T	T	G	C	C	G	A	T	T	C	T	C	A
IRAT 669::[B189]	B189	IRGC 135945	trop	2.5	C	G	G	G	C	C	A	A	C	A	G	G	T	G	T	C	G	G	A	C	T	T	C	A	G	G	C	A/G	T	C	C	A	T	T	G	C	C	G	A	T	T	C	T	C	A
TAIDONGLUDAO::[B196]	B196		trop	3	C	G	G	G	C	C	A	A	C	A	G	G	T	G	T	C	G	G	A	C	T	T	C	A	G	G	C	G	T	C	C	A	T	T	G	C	C	G	A	T	T	C	T	C	A
JIEFANGXIAN::[B198]	B198		ind1A	3	C	G	G	G	C	C	A	A	C	A	G	G	T	G	T	C	G	G	A	C	T	G	C	A	G	G	C	G	T	C	C	A	T	T	G	C	C	G	A	T	T	C	T	C	A
HONGMISANDAN::[B199]	B199		temp	3	C	G	G	G	C	C	A	A	C	A	G	G	T	G	T	C	G	G	A	C	T	G	C	A	G	G	C	G	T	C	C	A	T	T	G	C	C	G	A	T	T	C	T	C	A
HONGQI 5::[B215]	B215	IRGC 135904	temp	3	C	G	G	G	C	C	A	A	C	A	G	G	T	G	T	C	G	G	A	C	T	T	C	A	G	G	C	G	T	C	C	A	T	T	G	C	C	G	A	T	T	C	T	C	A
HANMADAO4::[B216]	B216		ind1A	3	C	G	G	G	C	C	A	A	C	A	G	G	T	G	T	C	G	G	A	C	T	G	C	A	G	G	C	G	T	C	C	A	T	T	G	C	C	G	A	T	T	C	T	C	A
WUZIDUI::[B218]	B218		temp	3	C	G	G	G	C	C	A	A	C	A	G	G	T	G	T	C	G	G	A	C	T	T	C	A	G	G	C	G	T	C	C	A	T	T	G	C	C	G	A	T	T	C	T	C	A
HAOLAI::[B219]	B219		indx	3	C	G	G	G	C	C	A	A	C	A	G	G	T	G	T	C	G	G	A	C	T	G	C	A	G	G	C	G	T	C	C	A	T	T	G	C	C	G	A	T	T	C	T	C	A
GUANTUIBAIHE 1::[B225]	B225		temp	3	C	G	G	G	C	C	A	A	C	A	G	G	T	G	T	C	G	G	A	C	T	T	C	A	G	G	C	G	T	C	C	A	T	T	G	C	C	G	A	T	T	C	T	C	A
HEIMANGDAO::[B226]	B226		temp	3	C	G	G	G	C	C	A	A	C	A	G	G	T	G	T	C	G	G	A	C	T	T	C	A	G	G	C	G	T	C	C	A	T	T	G	C	C	G	A	T	T	C	T	C	A
HAOBAYONG 1::[B228]	B228		japx	1.5	C	G	G	G	C	C	A	A	C	A	G	G	T	G	T	C	G	G	A	C	T	T/G	C	A	G	G	C	A/G	T	C	C	A	T	T	G	C	C	G	A	T	T	C	T	C	A
MENJIADING 2::[B229]	B229		indx	3	C	G	G	G	C	C	A	A	C	A	G	G	T	G	T	C	G	G	A	C	T	G	C	A	G	G	C	G	T	C	C	A	T	T	G	C	C	G	A	T	T	C	T	C	A
BANJIEMANG2::[B230]	B230		japx	3	C	G	G	G	C	C	A	A	C	A	G	G	T	G	T	C	G	G	A	C	T	T	C	A	G	G	C	G	T	C	C	A	T	T	G	C	C	G	A	T	T	C	T	C	A
ZHONGHUA 8::[B235]	B235		temp	0	C	G	G	G	C	C	A	A	C	A	G	G	T	G	T	C	G	G	A	C	T	T	C	A	G	G	C	A	T	C	C	A	T	T	G	C	C	G	A	T	T	C	T	C	A
JINDAO 1::[B236]	B236	IRGC 135957	temp	0	C	G	G	G	C	C	A	A	C	A	G	G	T	G	T	C	G	G	A	C	T	T	C	A	G	G	C	A	T	C	C	A	T	T	G	C	C	G	A	T	T	C	T	C	A
ZHENGDAO 5::[B240]	B240		temp	0	C	G	G	G	C	C	A	A	C	A	G	G	T	G	T	C	G	G	A	C	T	T	C	A	G	G	C	A	T	C	C	A	T	T	G	C	C	G	A	T	T	C	T	C	A
LAMUJIA::[B241]	B241		subtrop	0	C	G	G	G	C	C	A	A	C	A	G	G	T	G	T	C	G	G	A	C	T	T	C	A	G	G	C	A	T	C	C	A	T	T	G	C	C	G	A	T	T	C	T	C	A
SHANJIUGU::[B245]	B245		subtrop	3	C	G	G	G	C	C	A	A	C	A	G	G	T	G	T	C	G	G	A	C	T	T	C	A	G	G	C	G	T	C	C	A	T	T	G	C	C	G	A	T	T	C	T	C	A
LAOZAOGU::[B246]	B246		indx	3	C	G	G	G	C	C	A	A	C	A	G	G	T	G	T	C	G	G	A	C	T	G	C	A	G	G	C	G	T	C	C	A	T	T	G	C	C	G	A	T	T	C	T	C	A
JIANGNONGZAO 1 B::[B253]	B253		indx	3	C	G	G	G	C	C	A	A	C	A	G	G	T	G	T	C	G	G	A	C	T	T	C	A	G	G	C	G	T	C	C	A	T	T	G	C	C	G	A	T	T	C	T	C	A
JINGHU3 B::[B254]	B254		indx	3	C	G	G	G	C	C	A	A	C	A	G	G	T	G	T	C	G	G	A	C	T	T	C	A	G	G	C	G	T	C	C	A	T	T	G	C	C	G	A	T	T	C	T	C	A
DIANRUI 409B::[B255]	B255		indx	4	C	G	G	G	C	C	A	A	C	A	G	G	T	G	T	C	G	G	A	C	T	G	C	A	G	G	C	G	T	C	C	A	T	T	G	G	C	G	A	T	T	C	T	C	A
WEIGUO::[B263]	B263		temp	0	C	G	G	G	C	C	A	A	C	A	G	G	T	G	T	C	G	G	A	C	T	T	C	A	G	G	C	A	T	C	C	A	T	T	G	C	C	G	A	T	T	C	T	C	A
HAOMAKE (K)::[B266]	B266		subtrop	0	C	G	G	G	C	C	A	A	C	A	G	G	T	G	T	C	G	G	A	C	T	T	C	A	G	G	C	A	T	C	C	A	T	T	G	C	C	G	A	T	T	C	T	C	A
YUEFU::[B269]	B269	IRGC 136083	temp	0	C	G	G	G	C	C	A	A	C	A	G	G	T	G	T	C	G	G	A	C	T	T	C	A	G	G	C	A	T	C	C	A	T	T	G	C	C	G	A	T	T	C	T	C	A
RUBIO::[CX103]	CX103	IRGC 136036	admix	4	C	G	G	G	C	C	A	A	C	A	G	G	T	G	T	C	G	G	A	C	T	G	C	A	G	G	C	G	T	C	C	A	T	T	G	G	C	G	A	T	T	C	T	C	A
SADRI RICE 1::[CX104]	CX104	IRGC 136037	aro	1	C	G	G	G	C	C	A	A	C	A	G	G	T	G	T	C	G	G	A	C	T	T	C	A	G	G	C	A/G	T	C	C	A	T	T	G	C	C	G	A	T	T	C	T	C	A
DACCA6::[CX109]	CX109	IRGC 135876	japx	0	C	G	G	G	C	C	A	A	C	A	G	G	T	G	T	C	G	G	A	C	T	T	C	A	G	G	C	A	T	C	C	A	T	T	G	C	C	G	A	T	T	C	T	C	A
UP15::[CX110]	CX110	IRGC 136062	aro	3	C	G	G	G	C	C	A	A	C	A	G	G	T	G	T	C	G	G	A	C	T	T	C	A	G	G	C	G	T	C	C	A	T	T	G	C	C	G	A	T	T	C	T	C	A
BINIAPAN::[CX113]	CX113	IRGC 135846	trop	3	C	G	G	G	C	C	A	A	C	A	G	G	T	G	T	C	G	G	A	C	T	T	C	A	G	G	C	G	T	C	C	A	T	T	G	C	C	G	A	T	T	C	T	C	A
YUN HUI 72::[CX115]	CX115		indx	0	C	G	G	G	C	C	A	A	C	A	G	G	T	G	T	C	G	G	A	C	T	T	C	A	G	G	C	A	T	C	C	A	T	T	G	C	C	G	A	T	T	C	T	C	A
YETUOZAI::[CX118]	CX118		indx	4	C	G	G	G	C	C	A	A	C	A	G	G	T	G	T	C	G	G	A	C	T	G	C	A	G	G	C	G	T	C	C	A	T	T	G	G	C	G	A	T	T	C	T	C	A
YU QIU GU::[CX123]	CX123		ind1A	3	C	G	G	G	C	C	A	A	C	A	G	G	T	G	T	C	G	G	A	C	T	G	C	A	G	G	C	G	T	C	C	A	T	T	G	C	C	G	A	T	T	C	T	C	A
IR71466-75-3-B-1::[CX124]	CX124	IRGC 135936	indx	4	C	G	G	G	C	C	A	A	C	A	G	G	T	G	T	C	G	G	A	C	T	G	C	A	G	G	C	G	T	C	C	A	T	T	G	G	C	G	A	T	T	C	T	C	A
MOLOK::[CX129]	CX129	IRGC 135986	trop	1	C	G	G	G	C	C	A	A	T	A	G	G	T	G	T	C	G	G	A	C	T	T	C	A	G	G	C	A	T	C	C	A	T	T	G	C	C	G	A	T	T	C	T	C	A
CHIPDA::[CX130]	CX130	IRGC 135864	ind2	4	C	G	G	G	C	C	A	A	C	A	G	G	T	G	T	C	G	G	A	C	T	G	C	A	G	G	C	G	T	C	C	A	T	T	G	G	C	G	A	T	T	C	T	C	A
AMARELES::[CX139]	CX139	IRGC 135826	japx	0	C	G	G	G	C	C	A	A	C	A	G	G	T	G	T	C	G	G	A	C	T	T	C	A	G	G	C	A	T	C	C	A	T	T	G	C	C	G	A	T	T	C	T	C	A
CHENNONG 265::[CX14]	CX14		temp	0	C	G	G	G	C	C	A	A	C	A	G	G	T	G	T	C	G	G	A	C	T	T	C	A	G	G	C	A	T	C	C	A	T	T	G	C	C	G	A	T	T	C	T	C	A
PADI SIAM KUNING::[CX141]	CX141	IRGC 136019	ind3	3	C	G	G	G	C	C	A	A	C	A	G	G	T	G	T	C	G	G	A	C	T	G	C	A	G	G	C	G	T	C	C	A	T	T	G	C	C	G	A	T	T	C	T	C	A
AI YEH LU::[CX142]	CX142	IRGC 135823	japx	0	C	G	G	G	C	C	A	A	C	A	G	G	T	G	T	C	G	G	A	C	T	T	C	A	G	G	C	A	T	C	C	A	T	T	G	C	C	G	A	T	T	C	T	C	A
KHASAR::[CX143]	CX143	IRGC 135968	aro	3	C	G	G	G	C	C	A	A	C	A	G	G	T	G	T	C	G	G	A	C	T	T	C	A	G	G	C	G	T	C	C	A	T	T	G	C	C	G	A	T	T	C	T	C	A
KARNAL LOCAL::[CX149]	CX149		aro	3	C	G	G	G	C	C	A	A	C	A	G	G	T	G	T	C	G	G	A	C	T	G	C	A	G	G	C	G	T	C	C	A	T	T	G	C	C	G	A	T	T	C	T	C	A
CHOROFA::[CX150]	CX150	IRGC 135865	ind1B	4	C	G	G	G	C	C	A	A	C	A	G	G	T	G	T	C	G	G	A	C	T	G	C	A	G	G	C	G	T	C	C	A	T	T	G	G	C	G	A	T	T	C	T	C	A
AZUCENA::[CX151]	CX151	IRGC 117264	trop	1	C	G	G	G	C	C	A	A	T	A	G	G	T	G	T	C	G	G	A	C	T	T	C	A	G	G	C	A	T	C	C	A	T	T	G	C	C	G	A	T	T	C	T	C	A
JALMAGNA::[CX153]	CX153	IRGC 135951	ind2	3	C	G	G	G	C	C	A	A	C	A	G	G	T	G	T	C	G	G	A	C	T	G	C	A	G	G	C	G	T	C	C	A	T	T	G	C	C	G	A	T	T	C	T	C	A
MADHUKAR::[CX155]	CX155	IRGC 135979	ind2	4	C	G	G	G	C	C	A	A	C	A	G	G	T	G	T	C	G	G	A	C	T	G	C	A	G	G	C	G	T	C	C	A	T	T	G	G	C	G	A	T	T	C	T	C	A
MR84::[CX156]	CX156	IRGC 135995	indx	3	C	G	G	G	C	C	A	A	C	A	G	G	T	G	T	C	G	G	A	C	T	G	C	A	G	G	C	G	T	C	C	A	T	T	G	C	C	G	A	T	T	C	T	C	A
W1263::[CX160]	CX160	IRGC 136066	ind2	4	C	G	G	G	C	C	A	A	C	A	G	G	T	G	T	C	G	G	A	C	T	G	C	A	G	G	C	G	T	C	C	A	T	T	G	G	C	G	A	T	T	C	T	C	A
IR42::[CX161]	CX161	IRGC 135920	ind1B	4	C	G	G	G	C	C	A	A	C	A	G	G	T	G	T	C	G	G	A	C	T	G	C	A	G	G	C	G	T	C	C	A	T	T	G	G	C	G	A	T	T	C	T	C	A
WUYUGENG 3::[CX165]	CX165	IRGC 136071	temp	0	C	G	G	G	C	C	A	A	C	A	G	G	T	G	T	C	G	G	A	C	T	T	C	A	G	G	C	A	T	C	C	A	T	T	G	C	C	G	A	T	T	C	T	C	A
YUEXIANGZHAN::[CX17]	CX17		indx	4	C	G	G	G	C	C	A	A	C	A	G	G	T	G	T	C	G	G	A	C	T	G	C	A	G	G	C	G	T	C	C	A	T	T	G	G	C	G	A	T	T	C	T	C	A
SLG1::[CX182]	CX182	IRGC 136047	indx	3	C	G	G	G	C	C	A	A	C	A	G	G	T	G	T	C	G	G	A	C	T	G	C	A	G	G	C	G	T	C	C	A	T	T	G	C	C	G	A	T	T	C	T	C	A
IR69428-6-1-1-3-3::[CX205]	CX205	IRGC 135935	japx	1	C	G	G	G	C	C	A	A	T	A	G	G	T	G	T	C	G	G	A	C	T	T	C	A	G	G	C	A	T	C	C	A	T	T	G	C	C	G	A	T	T	C	T	C	A
GAOZI::[CX207]	CX207		indx	3	C	G	G	G	C	C	A	A	C	A	G	G	T	G	T	C	G	G	A	C	T	T	C	A	G	G	C	G	T	C	C	A	T	T	G	C	C	G	A	T	T	C	T	C	A
M3122::[CX211]	CX211		temp	0	C	G	G	G	C	C	A	A	C	A	G	G	T	G	T	C	G	G	A	C	T	T	C	A	G	G	C	A	T	C	C	A	T	T	G	C	C	G	A	T	T	C	T	C	A
BRAZIL NUODAO::[CX214]	CX214	IRGC 135849	trop	1	C	G	G	G	C	C	A	A	T	A	G	G	T	G	T	C	G	G	A	C	T	T	C	A	G	G	C	A	T	C	C	A	T	T	G	C	C	G	A	T	T	C	T	C	A
IRAT109::[CX220]	CX220	IRGC 135941	trop	3	C	G	G	G	C	C	A	A	C	A	G	G	T	G	T	C	G	G	A	C	T	T	C	A	G	G	C	G	T	C	C	A	T	T	G	C	C	G	A	T	T	C	T	C	A
IR06G113::[CX226]	CX226	IRGC 135916	ind1B	3	C	G	G	G	C	C	A	A	C	A	G	G	T	G	T	C	G	G	A	C	T	G	C	A	G	G	C	G	T	C	C	A	T	T	G	C	C	G	A	T	T	C	T	C	A
BALA::[CX228]	CX228	IRGC 135836	indx	3	C	G	G	G	C	C	A	A	C	A	G	G	T	G	T	C	G	G	A	C	T	G	C	A	G	G	C	G	T	C	C	A	T	T	G	C	C	G	A	T	T	C	T	C	A
B6136-3-TB-0-1-5::[CX237]	CX237	IRGC 135834	ind1B	3	C	G	G	G	C	C	A	A	C	A	G	G	T	G	T	C	G	G	A	C	T	G	C	A	G	G	C	G	T	C	C	A	T	T	G	C	C	G	A	T	T	C	T	C	A
CARIJO::[CX240]	CX240	IRGC 135859	indx	3	C	G	G	G	C	C	A	A	C	A	G	G	T	G	T	C	G	G	A	C	T	G	C	A	G	G	C	G	T	C	C	A	T	T	G	C	C	G	A	T	T	C	T	C	A
IAC47::[CX241]	CX241	IRGC 135913	trop	1	C	G	G	G	C	C	A	A	T	A	G	G	T	G	T	C	G	G	A	C	T	T	C	A	G	G	C	A	T	C	C	A	T	T	G	C	C	G	A	T	T	C	T	C	A
IR47686-4-4-B-1::[CX242]	CX242	IRGC 135921	admix	3	C	G	G	G	C	C	A	A	C	A	G	G	T	G	T	C	G	G	A	C	T	T/G	C	A	G	G	C	G	T	C	C	A	T	T	G	C	C	G	A	T	T	C	T	C	A
KINANDANGPATONG::[CX248]	CX248	IRGC 135970	trop	1	C	G	G	G	C	C	A	A	T	A	G	G	T	G	T	C	G	G	A	C	T	T	C	A	G	G	C	A	T	C	C	A	T	T	G	C	C	G	A	T	T	C	T	C	A
CISANGGARUNG::[CX25]	CX25	IRGC 135867	ind1B	3	C	G	G	G	C	C	A	A	C	A	G	G	T	G	T	C	G	G	A	C	T	G	C	A	G	G		G	T	C	C	A	T	T	G	C	C	G	A	T	T	C	T	C	A
XUDAO 4::[CX251]	CX251		temp	0	C	G	G	G	C	C	A	A	C	A	G	G	T	G	T	C	G	G	A	C	T	T	C	A	G	G	C	A	T	C	C	A	T	T	G	C	C	G	A	T	T	C	T	C	A
IAC3::[CX262]	CX262	IRGC 135912	trop	1	C	G	G	G	C	C	A	A	T	A	G	G	T	G	T	C	G	G	A	C	T	T	C	A	G	G	C	A	T	C	C	A	T	T	G	C	C	G	A	T	T	C	T	C	A
DINORADO::[CX266]	CX266	IRGC 135880	trop	1	C	G	G	G	C	C	A	A	T	A	G	G	T	G	T	C	G	G	A	C	T	T	C	A	G	G	C	A	T	C	C	A	T	T	G	C	C	G	A	T	T	C	T	C	A
IAC165::[CX269]	CX269	IRGC 135911	trop	1	C	G	G	G	C	C	A	A	T	A	G	G	T	G	T	C	G	G	A	C	T	T	C	A	G	G	C	A	T	C	C	A	T	T	G	C	C	G	A	T	T	C	T	C	A
NONGLINNUO::[CX285]	CX285	IRGC 136010	trop	3	C	G	G	G	C	C	A	A	C	A	G	G	T	G	T	C	G	G	A	C	T	T	C	A	G	G	C	G	T	C	C	A	T	T	G	C	C	G	A	T	T	C	T	C	A
C52::[CX287]	CX287		temp	0	C	G	G	G	C	C	A	A	C	A	G	G	T	G	T	C	G	G	A	C	T	T	C	A	G	G	C	A	T	C	C	A	T	T	G	C	C	G	A	T	T	C	T	C	A
MILYANG23::[CX29]	CX29	IRGC 135984	admix	0	C	G	G	G	C	C	A	A	C	A	G	G	T	G	T	C	G	G	A	C	T	T	C	A	G	G	C	A	T	C	C	A	T	T	G	C	C	G	A	T	T	C	T	C	A
BR24::[CX3]	CX3	IRGC 117623	ind1A	3	C	G	G	G	C	C	A	A	C	A	G	G	T	G	T	C	G	G	A	C	T	G	C	A	G	G	C	G	T	C	C	A	T	T	G	C	C	G	A	T	T	C	T	C	A
MONGOLIA RICE::[CX306]	CX306	IRGC 135987	temp	0	C	G	G	G	C	C	A	A	C	A	G	G	T	G	T	C	G	G	A	C	T	T	C	A	G	G	C	A	T	C	C	A	T	T	G	C	C	G	A	T	T	C	T	C	A
ZIDAO::[CX315]	CX315	IRGC 136097	temp	0	C	G	G	G	C	C	A	A	C	A	G	G	T	G	T	C	G	G	A	C	T	T	C	A	G	G	C	A	T	C	C	A	T	T	G	C	C	G	A	T	T	C	T	C	A
MENGGUANDAMAGU::[CX319]	CX319		indx	3	C	G	G	G	C	C	A	A	C	A	G	G	T	G	T	C	G	G	A	C	T	G	C	A	G	G	C	G	T	C	C	A	T	T	G	C	C	G	A	T	T	C	T	C	A
JINCHUANYIHAO::[CX329]	CX329	IRGC 135956	temp	0	C	G	G	G	C	C	A	A	C	A	G	G	T	G	T	C	G	G	A	C	T	T	C	A	G	G	C	A	T	C	C	A	T	T	G	C	C	G	A	T	T	C	T	C	A
YUEGUANG::[CX330]	CX330	IRGC 136084	temp	0	C	G	G	G	C	C	A	A	C	A	G	G	T	G	T	C	G	G	A	C	T	T	C	A	G	G	C	A	T	C	C	A	T	T	G	C	C	G	A	T	T	C	T	C	A
HEXI 41::[CX344]	CX344		temp	0	C	G	G	G	C	C	A	A	C	A	G	G	T	G	T	C	G	G	A	C	T	T	C	A	G	G	C	A	T	C	C	A	T	T	G	C	C	G	A	T	T	C	T	C	A
YUNGENG 23::[CX345]	CX345		temp	0	C	G	G	G	C	C	A	A	C	A	G	G	T	G	T	C	G	G	A	C	T	T	C	A	G	G	C	A	T	C	C	A	T	T	G	C	C	G	A	T	T	C	T	C	A
WUYUGENG 20::[CX350]	CX350		temp	0	C	G	G	G	C	C	A	A	C	A	G	G	T	G	T	C	G	G	A	C	T	T	C	A	G	G	C	A	T	C	C	A	T	T	G	C	C	G	A	T	T	C	T	C	A
BD007::[CX352]	CX352	IRGC 135839	trop	0	C	G	G	G	C	C	A	A	C	A	G	G	T	G	T	C	G	G	A	C	T	T	C	A	G	G	C	A	T	C	C	A	T	T	G	C	C	G	A	T	T	C	T	C	A
YUNLU 102::[CX355]	CX355	IRGC 136085	trop	3	C	G	G	G	C	C	A	A	C	A	G	G	T	G	T	C	G	G	A	C	T	T	C	A	G	G	C	G	T	C	C	A	T	T	G	C	C	G	A	T	T	C	T	C	A
YANDAO 8::[CX356]	CX356		temp	0	C	G	G	G	C	C	A	A	C	A	G	G	T	G	T	C	G	G	A	C	T	T	C	A	G	G	C	A	T	C	C	A	T	T	G	C	C	G	A	T	T	C	T	C	A
PSBRC80::[CX357]	CX357	IRGC 136023	ind1B	4	C	G	G	G	C	C	A	A	C	A	G	G	T	G	T	C	G	G	A	C	T	G	C	A	G	G	C	G	T	C	C	A	T	T	G	G	C	G	A	T	T	C	T	C	A
PSBRC82::[CX358]	CX358	IRGC 136024	ind1B	3.5	C	G	G	G	C	C	A	A	C	A	G	G	T	G	T	C	G	G	A	C	T	G	C	A	G	G	C	A/G	T	C	C	A	T	T	G	G	C	G	A	T	T	C	T	C	A
YUNLU 103::[CX359]	CX359		trop	3	C	G	G	G	C	C	A	A	C	A	G	G	T	G	T	C	G	G	A	C	T	T	C	A	G	G	C	G	T	C	C	A	T	T	G	C	C	G	A	T	T	C	T	C	A
HAOGELAO::[CX367]	CX367		trop	1.5	C	G	G	G	C	C	A	A	C/T	A	G	G	T	G	T	C	G	G	A	C	T	T/G	C	A	G	G	C		T	C	C	A	T	T	G	C	C	G	A	T	T	C	T	C	A
N22::[CX368]	CX368	IRGC 135996	aus	3	C	G	G	G	C	C	A	A	C	A	G	G	T	G	T	C	G	G	A	C	T	G	C	A	G	G	C	G	T	C	C	A	T	T	G	C	C	G	A	T	T	C	T	C	A
NERICA 8::[CX373]	CX373	IRGC 136002	trop	3	C	G	G	G	C	C	A	A	C	A	G	G	T	G	T	C	G	G	A	C	T	T	C	A	G	G	C	G	T	C	C	A	T	T	G	C	C	G	A	T	T	C	T	C	A
NERICA 9::[CX374]	CX374	IRGC 136003	trop	3	C	G	G	G	C	C	A	A	C	A	G	G	T	G	T	C	G	G	A	C	T	T	C	A	G	G	C	G	T	C	C	A	T	T	G	C	C	G	A	T	T	C	T	C	A
YANDAO 9::[CX380]	CX380		temp	0	C	G	G	G	C	C	A	A	C	A	G	G	T	G	T	C	G	G	A	C	T	T	C	A	G	G	C	A	T	C	C	A	T	T	G	C	C	G	A	T	T	C	T	C	A
HONGZA::[CX383]	CX383		temp	1.5	C	G	G	G	C	C	A	A	C	A	G	G	T	G	T	C	G	G	A	C	T	T	C	A	G	G	C	A/G	T	C	C	A	T	T	G	C	C	G	A	T	T	C	T	C	A
FENGZA::[CX384]	CX384		temp	0	C	G	G	G	C	C	A	A	C	A	G	G	T	G	T	C	G	G	A	C	T	T	C	A	G	G	C	A	T	C	C	A	T	T	G	C	C	G	A	T	T	C	T	C	A
YJ30::[CX391]	CX391	IRGC 136079	temp	0	C	G	G	G	C	C	A	A	C	A	G	G	T	G	T	C	G	G	A	C	T	T	C	A	G	G	C	A	T	C	C	A	T	T	G	C	C	G	A	T	T	C	T	C	A
MOLIZHANXUAN::[CX394]	CX394	IRGC 135985	ind1B	4	C	G	G	G	C	C	A	A	C	A	G	G	T	G	T	C	G	G	A	C	T	G	C	A	G	G	C	G	T	C	C	A	T	T	G	G	C	G	A	T	T	C	T	C	A
GUANDONG 194 (SOFT RICE)::[CX396]	CX396	IRGC 135898	temp	0	C	G	G	G	C	C	A	A	C	A	G	G	T	G	T	C	G	G	A	C	T	T	C	A	G	G	C	A	T	C	C	A	T	T	G	C	C	G	A	T	T	C	T	C	A
NANGENG 46 (SOFT RICE)::[CX397]	CX397		temp	0	C	G	G	G	C	C	A	A	C	A	G	G	T	G	T	C	G	G	A	C	T	T	C	A	G	G	C	A	T	C	C	A	T	T	G	C	C	G	A	T	T	C	T	C	A
MATATAG2::[CX399]	CX399	IRGC 135982	ind1B	4	C	G	G	G	C	C	A	A	C	A	G	G	T	G	T	C	G	G	A	C	T	G	C	A	G	G	C	G	T	C	C	A	T	T	G	G	C	G	A	T	T	C	T	C	A
CX427::[CX427]	CX427		temp	0	C	G	G	G	C	C	A	A	C	A	G	G	T	G	T	C	G	G	A	C	T	T	C	A	G	G	C	A	T	C	C	A	T	T	G	C	C	G	A	T	T	C	T	C	A
CX428::[CX428]	CX428		temp	0	C	G	G	G	C	C	A	A	C	A	G	G	T	G	T	C	G	G	A	C	T	T	C	A	G	G	C	A	T	C	C	A	T	T	G	C	C	G	A	T	T	C	T	C	A
CX429::[CX429]	CX429		temp	0	C	G	G	G	C	C	A	A	C	A	G	G	T	G	T	C	G	G	A	C	T	T	C	A	G	G	C	A	T	C	C	A	T	T	G	C	C	G	A	T	T	C	T	C	A
DIANGENG::[CX47]	CX47	IRGC 135879	temp	0	C	G	G	G	C	C	A	A	C	A	G	G	T	G	T	C	G	G	A	C	T	T	C	A	G	G	C	A	T	C	C	A	T	T	G	C	C	G	A	T	T	C	T	C	A
108S::[CX5]	CX5		indx	4	C	G	G	G	C	C	A	A	C	A	G	G	T	G	T	C	G	G	A	C	T	G	C	A	G	G	C	G	T	C	C	A	T	T	G	G	C	G	A	T	T	C	T	C	A
BABAOMI::[CX51]	CX51	IRGC 135835	indx	2.5	C	G	G	G	C	C	A	A	C	A	G	G	T	G	T	C	G	G	A	C	T	T/G	C	A	G	G	C	G	T	C	C	A	T	T	G	C	C	G	A	T	T	C	T	C	A
DIANDUN 502::[CX52]	CX52	IRGC 135878	indx	3	C	G	G	G	C	C	A	A	C	A	G	G	T	G	T	C	G	G	A	C	T	G	C	A	G	G	C	G	T	C	C	A	T	T	G	C	C	G	A	T	T	C	T	C	A
YUNGUANG 8::[CX56]	CX56		temp	0	C	G	G	G	C	C	A	A	C	A	G	G	T	G	T	C	G	G	A	C	T	T	C	A	G	G	C	A	T	C	C	A	T	T	G	C	C	G	A	T	T	C	T	C	A
CX578::[CX578]	CX578		temp	4	C	G	G	G	C	C	A	A	C	A	G	G	T	G	T	C	G	G	A	C	T	G	C	A	G	G	C	G	T	C	C	A	T	T	G	G	C	G	A	T	T	C	T	C	A
MILAGROSA, ZAWA BANDAY::[CX59]	CX59	IRGC 135983	aro	3	C	G	G	G	C	C	A	A	C	A	G	G	T	G	T	C	G	G	A	C	T	T	C	A	G	G	C	G	T	C	C	A	T	T	G	C	C	G	A	T	T	C	T	C	A
JHONA 349::[CX63]	CX63	IRGC 117769	aus	3	C	G	G	G	C	C	A	A	C	A	G	G	T	G	T	C	G	G	A	C	T	G	C	A	G	G	C	G	T	C	C	A	T	T	G	C	C	G	A	T	T	C	T	C	A
DOMSIAH::[CX65]	CX65	IRGC 117467	aro	3	C	G	G	G	C	C	A	A	C	A	G	G	T	G	T	C	G	G	A	C	T	T	C	A	G	G	C	G	T	C	C	A	T	T	G	C	C	G	A	T	T	C	T	C	A
TAROM MOLAII::[CX66]	CX66	IRGC 136052	aro	0	C	G	G	G	C	C	A	A	C	A	G	G	T	G	T	C	G	G	A	C	T	T	C	A	G	G	C	A	T	C	C	A	T	T	G	C	C	G	A	T	T	C	T	C	A
BINAM::[CX67]	CX67	IRGC 135845	aro	0	C	G	G	G	C	C	A	A	C	A	G	G	T	G	T	C	G	G	A	C	T	T	C	A	G	G	C	A	T	C	C	A	T	T	G	C	C	G	A	T	T	C	T	C	A
MR106::[CX68]	CX68	IRGC 135989	indx	3	C	G	G	G	C	C	A	A	C	A	G	G	T	G	T	C	G	G	A	C	T	G	C	A	G	G	C	G	T	C	C	A	T	T	G	C	C	G	A	T	T	C	T	C	A
MR167::[CX69]	CX69	IRGC 135990	indx	3	C	G	G	G	C	C	A	A	C	A	G	G	T	G	T	C	G	G	A	C	T	G	C	A	G	G	C	G	T	C	C	A	T	T	G		C	G	A	T	T	C	T	C	A
INNMAYEBAW::[CX71]	CX71	IRGC 135915	ind3	2.5	C	G	G	G	C	C	A	A	C	A	G	G	T	G	T	C	G	G	A	C	T	T/G	C			G	C	G	T	C	C	A	T	T	G	C	C	G							A
BASMATI 385::[CX72]	CX72	IRGC 135838	aro	0	C	G	G	G	C	C	A	A	C	A	G	G	T	G	T	C	G	G	A	C	T	T	C	A	G	G	C	A	T	C	C	A	T	T	G	C	C	G	A	T	T	C	T	C	A
JP-5::[CX74]	CX74	IRGC 135961	temp	0	C	G	G	G	C	C	A	A	C	A	G	G	T	G	T	C	G	G	A	C	T	T	C	A	G	G	C	A	T	C	C	A	T	T	G	C	C	G	A	T	T	C	T	C	A
CS94::[CX79]	CX79	IRGC 135873	ind1B	4	C	G	G	G	C	C	A	A	C	A	G	G	T	G	T	C	G	G	A	C	T	G	C	A	G	G	C	G	T	C	C	A	T	T	G	G	C	G	A	T	T	C	T	C	A
HUANYANGNIAN::[CX88]	CX88		ind1A	3	C	G	G	G	C	C	A	A	C		G	G	T	G	T	C	G	G	A	C	T	G	C	A	G	G	C	G	T	C	C	A	T	T	G	C	C	G	A	T	T	C	T	C	A
GOVIND::[CX91]	CX91	IRGC 135897	ind1B	3	C	G	G	G	C	C	A	A	C	A	G	G	T	G	T	C	G	G	A	C	T	G	C	A	G	G	C	G	T	C	C	A	T	T	G	C	C	G	A	T	T	C	T	C	A
AJAYA::[CX96]	CX96	IRGC 135824	ind1B	3	C	G	G	G	C	C	A	A	C	A	G	G	T	G	T	C	G	G	A	C	T	G	C	A	G	G	C	G	T	C	C	A	T	T	G	C	C	G	A	T	T	C	T	C	A
DODDI::[CX99]	CX99	IRGC 135883	ind2	4	C	G	G	G	C	C	A	A	C	A	G	G	T	G	T	C	G	G	A	C	T	G	C	A	G	G	C	G	T	C	C	A	T	T	G	G	C	G	A	T	T	C	T	C	A
LALKA (LAL DHAN)::IRGC 64946-1::[IRIS 313-10010]	IRIS 313-10010	IRGC 125818	ind2	3	C	G	G	G	C	C	A	A	C	A	G	G	T	G	T	C	G	G	A	C	T	G	C	A	G	G	C	G	T	C	C	A	T	T	G	C	C	G	A	T	T	C	T	C	A
HODARAWALA::IRGC 67631-1::[IRIS 313-10020]	IRIS 313-10020	IRGC 120968	aus	3	C	G	G	G	C	C	A	A	C	A	G	G	T	G	T	C	G	G	A	C	T	G	C	A	G	G	C	G	T	C	C	A	T	T	G	C	C	G	A	T	T	C	T	C	A
KALAPATLE::IRGC 68500-1::[IRIS 313-10025]	IRIS 313-10025	IRGC 125790	admix	3	C	G	G	G	C	C	A	A	C	A	G	G	T	G	T	C	G	G	A	C	T	G	C	A	G	G	C	G	T	C	C	A	T	T	G	C	C	G	A	T	T	C	T	C	A
KITRANA 1007::IRGC 68517-1::[IRIS 313-10026]	IRIS 313-10026	IRGC 125804	ind2	4	C	G	G	G	C	C	A	A	C	A	G	G	T	G	T	C	G	G	A	C	T	G	C	A	G	G	C	G	T	C	C	A	T	T	G	G	C	G	A	T	T	C	T	C	A
NS 252::IRGC 68878-1::[IRIS 313-10030]	IRIS 313-10030	IRGC 121075	ind2	4	C	G	G	G	C	C	A	A	C	A	G	G	T	G	T	C	G	G	A	C	T	G	C	A	G	G	C	G	T	C	C	A	T	T	G	G	C	G	A	T	T	C	T	C	A
NS 1576::IRGC 68951-1::[IRIS 313-10032]	IRIS 313-10032	IRGC 125858	aro	0	C	G	G	G	C	C	A	A	C	A	G	G	T	G	T	C	G	G	A	C	T	T	C	A	G	G	C	A	T	C	C	A	T	T	G	C	C	G	A	T	T	C	T	C	A
RIZ TYPE SORGHO::IRGC 69015-1::[IRIS 313-10035]	IRIS 313-10035	IRGC 125887	ind2	3	C	G	G	G	C	C	A	A	C	A	G	G	T	G	T	C	G	G	A	C	T	T	C	A	G	G	C	G	T	C	C	A	T	T	G	C	C	G	A	T	T	C	T	C	A
BANTA TIMA::IRGC 69474-1::[IRIS 313-10045]	IRIS 313-10045	IRGC 125673	indx	3	C	G	G	G	C	C	A	A	C	A	G	G	T	G	T	C	G	G	A	C	T	G	C	A	G	G	C	G	T	C	C	A	T	T	G	C	C	G	A	T	T	C	T	C	A
MOVE (MOKOLE)::IRGC 69739-1::[IRIS 313-10048]	IRIS 313-10048	IRGC 125996	indx	3	C	G	G	G	C	C	A	A	C	A	G	G	T	G	T	C	G	G	A	C	T	G	C	A	G	G	C	G	T	C	C	A	T	T	G	C	C	G	A	T	T	C	T	C	A
TSIVIMBININA::IRGC 69890-1::[IRIS 313-10051]	IRIS 313-10051	IRGC 127067	trop	3	C	G	G	G	C	C	A	A	C	A	G	G	T	G	T	C	G	G	A	C	T	T	C	A	G	G	C	G	T	C	C	A	T	T	G	C	C	G	A	T	T	C	T	C	A
TOC 5430::IRGC 70487-1::[IRIS 313-10054]	IRIS 313-10054	IRGC 125924	indx	3.5	C	G	G	G	C	C	A	A	C	A	G	G	T	G	T	C	G	G	A	C	T	G	C	A	G	G	C	G	T	C	C	A	T	T	G	C/G	C	G	A	T	T	C	T	C	A
HOKURIKU 52::IRGC 72491-1::[IRIS 313-10056]	IRIS 313-10056	IRGC 125763	subtrop	0	C	G	G	G	C	C	A	A	C	A	G	G	T	G	T	C	G	G	A	C	T	T	C	A	G	G	C	A	T	C	C	A	T	T	G	C	C	G	A	T	T	C	T	C	A
CHUGOKU 68 HEN::IRGC 72514-1::[IRIS 313-10057]	IRIS 313-10057	IRGC 125707	temp	0	C	G	G	G	C	C	A	A	C	A	G	G	T	G	T	C	G	G	A	C	T	T	C	A	G	G	C	A	T	C	C	A	T	T	G	C	C	G	A	T	T	C	T	C	A
ESTRELA A::IRGC 72918-1::[IRIS 313-10061]	IRIS 313-10061	IRGC 125733	japx	0	C	G	G	G	C	C	A	A	C	A	G	G	T	G	T	C	G	G	A	C	T	T	C	A	G	G	C	A	T	C	C	A	T	T	G	C	C	G	A	T	T	C	T	C	A
REA::IRGC 73031-1::[IRIS 313-10062]	IRIS 313-10062	IRGC 126141	trop	0	C	G	G	G	C	C	A	A	C	A	G	G	T	G	T	C	G	G	A	C	T	T	C	A	G	G	C	A	T	C	C	A	T	T	G	C	C	G	A	T	T	C	T	C	A
JAERAERYUKDO::IRGC 73053-1::[IRIS 313-10065]	IRIS 313-10065	IRGC 127055	trop	3	C	G	G	G	C	C	A	A	C	A	G	G	T	G	T	C	G	G	A	C	T	T	C	A	G	G	C	G	T	C	C	A	T	T	G	C	C	G	A	T	T	C	T	C	A
CHIYODA WASE::IRGC 74467-1::[IRIS 313-10071]	IRIS 313-10071	IRGC 125705	trop	3	C	G	G	G	C	C	A	A	C	A	G	G	T	G	T	C	G	G	A	C	T	T	C	A	G	G	C	G	T	C	C	A	T	T	G	C	C	G	A	T	T	C	T	C	A
OWARI MOCHI::IRGC 74513-1::[IRIS 313-10073]	IRIS 313-10073	IRGC 125864	trop	3	C	G	G	G	C	C	A	A	C	A	G	G	T	G	T	C	G	G	A	C	T	T	C	A		G	C	G	T	C	C	A	T	T	G	C	C	G	A	T	T	C	T	C	A
RIKU AIKOKU::IRGC 74514-1::[IRIS 313-10074]	IRIS 313-10074	IRGC 125884	trop	3	C	G	G	G	C	C	A	A	C	A	G	G	T	G	T	C	G	G	A	C	T	T	C	A	G	G	C	G	T	C	C	A	T	T	G	C	C	G	A	T	T	C	T	C	A
SANGOKU::IRGC 74518-1::[IRIS 313-10075]	IRIS 313-10075	IRGC 125895	trop	3	C	G	G	G	C	C	A	A	C	A	G	G	T	G	T	C	G	G	A	C	T	T	C	A	G	G	C	G	T	C	C	A	T	T	G	C	C	G	A	T	T	C	T	C	A
SHINA MOCHI::IRGC 74523-1::[IRIS 313-10076]	IRIS 313-10076	IRGC 125900	trop	3	C	G	G	G	C	C	A	A	C	A	G	G	T	G	T	C	G	G	A	C	T	T	C	A	G	G	C	G	T	C	C	A	T	T	G	C	C	G	A	T	T	C	T	C	A
TAMASHIRO HIKARI::IRGC 74534-1::[IRIS 313-10077]	IRIS 313-10077	IRGC 125917	indx	4	C	G	G	G	C	C	A	A	C	A	G	G	T	G	T	C	G	G	A	C	T	G	C	A	G	G	C	G	T	C	C	A	T	T	G	G	C	G	A	T	T	C	T	C	A
YOSHINO MOCHI::IRGC 74550-1::[IRIS 313-10078]	IRIS 313-10078	IRGC 125947	trop	3	C	G	G	G	C	C	A	A	C	A	G	G	T	G	T	C	G	G	A	C	T	T	C	A	G	G	C	G	T	C	C	A	T	T	G	C	C	G	A	T	T	C	T	C	A
DANGO MOCHI::IRGC 74551-1::[IRIS 313-10079]	IRIS 313-10079	IRGC 125722	trop	3	C	G	G	G	C	C	A	A	C	A	G	G	T	G	T	C	G	G	A	C	T	T	C	A	G	G	C	G	T	C	C	A	T	T	G	C	C	G	A	T	T	C	T	C	A
HIRAKAWA OKUTE::IRGC 74554-1::[IRIS 313-10080]	IRIS 313-10080	IRGC 125762	trop	3	C	G	G	G	C	C	A	A	C	A	G	G	T	G	T	C	G	G	A	C	T	T	C	A	G	G	C	G	T	C	C	A	T	T	G	C	C	G	A	T	T	C	T	C	A
KYUUSHUU::IRGC 74558-1::[IRIS 313-10082]	IRIS 313-10082	IRGC 125816	trop	3	C	G	G	G	C	C	A	A	C	A	G	G	T	G	T	C		G	A	C	T	T	C	A	G	G	C	G	T	C	C	A	T	T	G	C	C	G	A	T	T	C	T	C	A
BETIS::IRGC 74581-1::[IRIS 313-10083]	IRIS 313-10083	IRGC 125679	temp	0	C	G	G	G	C	C	A	A	C	A	G	G	T	G	T	C	G	G	A	C	T	T	C	A	G	G	C	A	T	C	C	A	T	T	G	C	C	G	A	T	T	C	T		A
SENIA::IRGC 74582-1::[IRIS 313-10084]	IRIS 313-10084	IRGC 125899	temp	3	C	G	G	G	C		A	A	C	A	G	G	T	G	T	C	G	G	A	C	T	T	C	A	G	G	C	G	T	C	C	A	T	T	G	C	C	G	A	T	T	C	T	C	A
CHALBYEO::IRGC 77639-1::[IRIS 313-10092]	IRIS 313-10092	IRGC 125698	temp	0	C	G	G	G	C	C	A	A	C	A	G	G	T	G	T	C	G	G	A	C	T	T	C	A	G	G	C	A	T	C	C	A	T	T	G	C	C	G	A	T	T	C	T	C	A
CHEONJUDO::IRGC 77644-1::[IRIS 313-10093]	IRIS 313-10093	IRGC 125700	temp	0	C	G	G	G	C	C	A	A	C	A	G	G	T	G	T	C	G	G	A	C	T	T	C	A	G	G	C	A	T	C	C	A	T	T	G	C	C	G	A	T	T	C	T	C	A
GAWICHAL::IRGC 77653-1::[IRIS 313-10094]	IRIS 313-10094	IRGC 125750	trop	3	C	G	G	G	C	C	A	A	C	A	G	G	T	G	T	C	G	G	A	C	T	T	C	A	G	G	C	G	T	C	C	A	T	T	G	C	C	G	A	T	T	C	T	C	A
JOKJEBICHAL::IRGC 77663-1::[IRIS 313-10096]	IRIS 313-10096	IRGC 125787	japx	3	C	G	G	G	C	C	A	A	C	A	G	G	T	G	T	C	G	G	A	C	T	T	C	A	G	G	C	G	T	C	C	A	T	T	G	C	C	G	A	T	T	C	T	C	A
MANONGAZATO::IRGC 77876-1::[IRIS 313-10099]	IRIS 313-10099	IRGC 126303	trop	3	C	G	G	G	C	C	A	A	C	A	G	G	T	G	T	C	G	G	A	C	T	T	C	A	G	G	C	G	T	C	C	A	T	T	G	C	C	G	A	T	T	C	T	C	A
FACAGRO 64::IRGC 82059-1::[IRIS 313-10114]	IRIS 313-10114	IRGC 125739	ind2	4	C	G	G	G	C	C	A	A	C	A	G	G	T	G	T	C	G	G	A	C	T	G	C	A	G	G	C	G	T	C	C	A	T	T	G	G	C	G	A	T	T	C	T	C	A
GALSAEGSSAL SHAREI::IRGC 82881-1::[IRIS 313-10124]	IRIS 313-10124		temp	0	C	G	G	G	C	C	A	A	C	A	G	G	T	G	T	C	G	G	A	C	T	T	C	A	G	G	C	A	T	C	C	A	T	T	G	C	C	G	A	T	T	C	T	C	A
CAUVERY::IRGC 45255-1::[IRIS 313-10148]	IRIS 313-10148	IRGC 125695	indx	4	C	G	G	G	C	C	A	A	C	A	G	G	T	G	T	C	G	G	A	C	T	G	C	A	G	G	C	G	T	C	C	A	T	T	G	G	C	G	A	T	T	C	T	C	A
N 22::IRGC 46459-1::[IRIS 313-10150]	IRIS 313-10150	IRGC 126249	aus	3	C	G	G	G	C	C	A	A	C	A	G	G	T	G	T	C	G	G	A	C	T	G	C	A	G	G	C	G	T	C	C	A	T	T	G	C	C	G	A	T	T	C	T	C	A
IR 13429-109-2-2-1::IRGC 63491-1::[IRIS 313-10167]	IRIS 313-10167	IRGC 125773	indx	4	C	G	G	G	C	C	A	A	C	A	G	G	T	G	T	C	G	G	A	C	T	G	C	A	G	G	C	G	T	C	C	A	T	T	G	G	C	G	A	T	T	C	T	C	A
NAM ROO::IRGC 66996-1::[IRIS 313-10176]	IRIS 313-10176	IRGC 125848	subtrop	3	C	G	G	G	C	C	A	A	C	A	G	G	T	G	T	C	G	G	A	C	T	T	C	A	G	G	C	G	T	C	C	A	T	T	G	C	C	G	A	T	T	C	T	C	A
DA NUO (ZHAN)::IRGC 72025-1::[IRIS 313-10189]	IRIS 313-10189	IRGC 125723	ind1A	3	C	G	G	G	C	C	A	A	C	A	G	G	T	G	T	C	G	G	A	C	T	G	C	A	G	G	C	G	T	C	C	A	T	T	G	C	C	G	A	T	T	C	T	C	A
HAN NUO::IRGC 82350-1::[IRIS 313-10228]	IRIS 313-10228	IRGC 125758	temp	3	C	G	G	G	C	C	A	A	C	A	G	G	T	G	T	C	G	G	A	C	T	T	C	A	G	G	C	G	T	C	C	A	T	T	G	C	C	G	A	T	T	C	T	C	A
PSBRC 50::IRGC 99706-1::[IRIS 313-10234]	IRIS 313-10234	IRGC 125873	ind1B	3	C	G	G	G	C	C	A	A	C	A	G	G	T	G	T	C	G	G	A	C	T	G	C	A	G	G	C	G	T	C	C	A	T	T	G	C	C	G	A	T	T	C	T	C	A
PSBRC 68::IRGC 99711-1::[IRIS 313-10235]	IRIS 313-10235	IRGC 125874	indx	3	C	G	G	G	C	C	A	A	C	A	G	G	T	G	T	C	G	G	A	C	T	T	C	A	G	G	C	G	T	C	C	A	T	T	G	C	C	G	A	T	T	C	T	C	A
BULI INIA::IRGC 116961-1::[IRIS 313-10258]	IRIS 313-10258	IRGC 126050	temp	0	C	G	G	G	C	C	A	A	C	A	G	G	T	G	T	C	G	G	A	C	T	T	C	A	G	G	C	A		C	C	A	T	T	G	C	C	G	A	T	T	C	T	C	A
COLOMBIA 1::IRGC 116970-1::[IRIS 313-10272]	IRIS 313-10272	IRGC 125714	japx	3	C	G	G	G	C	C	A	A	C	A	G	G	T	G	T	C	G	G	A	C	T	T	C	A	G	G	C	G	T	C	C	A	T	T	G	C	C	G	A	T	T	C	T	C	A
ICTA MOTAGUA::IRGC 116995-1::[IRIS 313-10275]	IRIS 313-10275	IRGC 125968	indx	4	C	G	G	G	C	C	A	A	C	A	G	G	T	G	T	C	G	G	A	C	T	G	C	A	G	G	C	G	T	C	C	A	T	T	G	G	C	G	A	T	T	C	T	C	A
ELONI::IRGC 116980-1::[IRIS 313-10290]	IRIS 313-10290	IRGC 125963	ind1B	4	C	G	G	G	C	C	A	A	C	A	G	G	T	G	T	C	G	G	A	C	T	G	C	A	G	G	C	G	T	C	C	A	T	T	G	G	C	G	A	T	T	C	T	C	A
PDR 34-2-1-2::IRGC 117020-1::[IRIS 313-10295]	IRIS 313-10295	IRGC 127065	admix	3	C	G	G	G	C	C	A	A	C	A	G	G	T	G	T	C	G	G	A	C	T	G	C	A	G	G	C	G	T	C	C	A	T	T	G	C	C	G	A	T	T	C	T	C	A
INIAP 6::IRGC 117002-1::[IRIS 313-10307]	IRIS 313-10307	IRGC 127050	indx	3	C	G	G	G	C	C	A	A	C	A	G	G	T	G	T	C	G	G	A	C	T	G	C	A	G	G	C	G	T	C	C	A	T	T	G	C	C	G	A	T	T	C	T	C	A
RUSTIC::IRGC 117026-1::[IRIS 313-10318]	IRIS 313-10318	IRGC 126085	indx	3	C	G	G	G	C	C	A	A	C	A	G	G	T	G	T	C	G	G	A	C	T	T	C	A	G	G	C	G	T	C	C	A	T	T	G	C	C	G	A	T	T	C	T	C	A
CAMPONI::IRGC 116963-1::[IRIS 313-10325]	IRIS 313-10325	IRGC 125956	indx	3	C	G	G	G	C	C	A	A	C	A	G	G	T	G	T	C	G	G	A	C	T	G	C	A	G	G	C	G	T	C	C	A	T	T	G	C	C	G	A	T	T	C	T	C	A
B 6136-3-TB-0-1-5::IRGC 117312-1::[IRIS 313-10333]	IRIS 313-10333	IRGC 125951	ind1B	3	C	G	G	G	C	C	A	A	C	A	G	G	T	G	T	C	G	G	A	C	T	G	C	A	G	G	C	G	T	C	C	A	T	T	G	C	C	G	A	T	T	C	T	C	A
B 6136 E-3-TB-0-1-5::IRGC 117311-1::[IRIS 313-10334]	IRIS 313-10334	IRGC 125952	ind1B	3	C	G	G	G	C	C	A	A	C	A	G	G	T	G	T	C	G	G	A	C	T	G		A	G	G	C	G	T	C	C	A	T	T	G	C	C	G	A	T	T	C	T	C	A
B 6144-MR-6-0-0::IRGC 117371-1::[IRIS 313-10336]	IRIS 313-10336		trop	3	C	G	G	G	C	C	A	A	C	A	G	G	T	G	T	C	G	G	A	C	T	T	C	A	G	G	C	G	T	C	C	A	T	T	G	C	C	G	A	T	T	C	T	C	A
IR 53650-2B-10-1-2-1::IRGC 117379-1::[IRIS 313-10359]	IRIS 313-10359	IRGC 125973	indx	4	C	G	G	G	C	C	A	A	C	A	G	G	T	G	T	C	G	G	A	C	T	G	C	A	G	G	C	G	T	C	C	A	T	T	G	G	C	G	A	T	T	C	T	C	A
IR 57514-PMI 5-B-1-2::IRGC 117372-1::[IRIS 313-10360]	IRIS 313-10360	IRGC 126025	indx	3	C	G	G	G	C	C	A	A	C	A	G	G	T	G	T	C	G	G	A	C	T	G	C	A	G	G	C	G	T	C	C	A	T	T	G	C	C	G	A	T	T	C	T	C	A
IR 67518-B-11-1-B::IRGC 117380-1::[IRIS 313-10371]	IRIS 313-10371	IRGC 126026	indx	4	C	G	G	G	C	C	A	A	C	A	G	G	T	G	T	C	G	G	A	C	T	G	C	A	G	G	C	G	T	C	C	A	T	T	G	G	C	G	A	T	T	C	T	C	A
IR 70027-8-2-2-3-2::IRGC 117382-1::[IRIS 313-10375]	IRIS 313-10375	IRGC 126028	indx	3	C	G	G	G	C	C	A	A	C	A	G	G	T	G	T	C	G	G	A	C	T	G	C	A	G	G	C	G	T	C	C	A	T	T	G	C	C	G	A	T	T	C	T	C	A
IR 73688-57-2::IRGC 117383-1::[IRIS 313-10379]	IRIS 313-10379	IRGC 125980	temp	0	C	G	G	G	C	C	A	A	C	A	G	G	T	G	T	C	G	G	A	C	T	T	C	A	G	G	C	A	T	C	C	A	T	T	G	C	C	G	A	T	T	C	T	C	A
IR 73690-7-2-1-1-3-2-2-1::IRGC 117384-1::[IRIS 313-10380]	IRIS 313-10380	IRGC 125981	aus	3	C	G	G	G	C	C	A	A	C	A	G	G	T	G	T	C	G	G	A	C	T	G	C	A	G	G	C	G	T	C	C	A	T	T	G	C	C	G	A	T	T	C	T	C	A
IR 77390-1-6-4-19-1-B::IRGC 117303-1::[IRIS 313-10392]	IRIS 313-10392	IRGC 127075	ind1B	3	C	G	G	G	C	C	A	A	C	A	G	G	T	G	T	C	G	G	A	C	T	G	C	A	G	G	C	G	T	C	C	A	T	T	G	C	C	G	A	T	T	C	T	C	A
IRGA 346-111-2-1F::IRGC 117341-1::[IRIS 313-10399]	IRIS 313-10399	IRGC 120992	indx	3	C	G	G	G	C	C	A	A	C	A	G	G	T	G	T	C	G	G	A	C	T	G	C	A	G	G	C	G	T	C	C	A	T	T	G	C	C	G	A	T	T	C	T	C	A
RR 272-17-829::IRGC 117354-1::[IRIS 313-10412]	IRIS 313-10412	IRGC 121103	indx	3	C	G	G	G	C	C	A	A	C	A	G	G	T	G	T	C	G	G	A	C	T	G	C	A	G	G	C	G	T	C	C	A	T	T	G	C	C	G	A	T	T	C	T	C	A
WAR 87-7-A10-2-B-B-B-1::IRGC 117362-1::[IRIS 313-10422]	IRIS 313-10422		indx	3	C	G	G	G	C	C	A	A	C	A	G	G	T	G	T	C	G	G	A	C	T	T	C	A	G	G	C	G	T	C	C	A	T	T	G	C	C	G	A	T	T	C	T	C	A
SERAUP 50::IRGC 14-1::[IRIS 313-10428]	IRIS 313-10428		ind3	3	C	G	G	G	C	C	A	A	C	A	G	G	T	G	T	C	G	G	A	C	T	G	C	A	G	G	C	G	T	C	C	A	T	T	G	C	C	G	A	T	T	C	T	C	A
TAICHUNG 150::IRGC 80-1::[IRIS 313-10429]	IRIS 313-10429	IRGC 127834	temp	0	C	G	G	G	C	C	A	A	C	A	G	G	T	G	T	C	G	G	A	C	T	T	C	A	G	G	C	A	T	C	C	A	T	T	G	C	C	G	A	T	T	C	T	C	A
TP MIL 53::IRGC 326-2::[IRIS 313-10433]	IRIS 313-10433	IRGC 128193	indx	3	C	G	G	G	C	C	A	A	C	A	G	G	T	G	T	C	G	G	A	C	T	G	C	A	G	G	C	G	T	C	C	A	T	T	G	C	C	G	A	T	T	C	T	C	A
NAGKAYAT::IRGC 584-1::[IRIS 313-10440]	IRIS 313-10440	IRGC 127642	temp	3	C	G	G	G	C	C	A	A	C	A	G	G	T	G	T	C	G	G	A	C	T	T	C	A	G	G	C	G	T	C	C	A	T	T	G	C	C	G	A	T	T	C	T	C	A
KINUGASAWASE::IRGC 2609-1::[IRIS 313-10469]	IRIS 313-10469	IRGC 128347	temp	0	C	G	G	G	C	C	A	A	C	A	G	G	T	G	T	C	G	G	A	C	T	T	C	A	G	G	C	A	T	C	C	A	T	T	G	C	C	G	A	T	T	C	T	C	A
PACHCHAIPERUMAL 2462-11::IRGC 3474-1::[IRIS 313-10476]	IRIS 313-10476	IRGC 127698	ind2	4	C	G	G	G	C	C	A	A	C	A	G	G	T	G	T	C	G	G	A	C	T	G	C	A	G	G	C	G	T	C	C	A	T	T	G	G	C	G	A	T	T	C	T	C	A
PULUT NANGKA 16::IRGC 3630-2::[IRIS 313-10480]	IRIS 313-10480	IRGC 132365	indx	3	C	G	G	G	C	C	A	A	C	A	G	G	T	G	T	C	G	G	A	C	T	G	C	A	G	G	C	G	T	C	C	A	T	T	G	C	C	G	A	T	T	C	T	C	A
CATIBOS::IRGC 3762-1::[IRIS 313-10485]	IRIS 313-10485	IRGC 127248	trop	1	C	G	G	G	C	C	A	A	T	A	G	G	T	G	T	C	G	G	A	C	T	T	C	A	G	G	C	A	T	C	C	A	T	T	G	C	C	G	A	T	T	C	T	C	A
MOROPOTOL::IRGC 3909-1::[IRIS 313-10489]	IRIS 313-10489	IRGC 127630	trop	1	C	G	G	G	C	C	A	A	T	A	G	G	T	G	T	C	G	G	A	C	T	T	C	A	G	G	C	A	T	C	C	A	T	T	G	C	C	G	A	T	T	C	T	C	A
HSIANG TSENF TAO::IRGC 5008-1::[IRIS 313-10507]	IRIS 313-10507	IRGC 128311	trop	3	C	G	G	G	C	C	A	A	C	A	G	G	T	G	T	C	G	G	A	C	T	T	C	A	G	G	C	G	T	C	C	A	T	T	G	C	C	G	A	T	T	C	T	C	A
CAMPENA::IRGC 5452-2::[IRIS 313-10514]	IRIS 313-10514	IRGC 135629	indx	3	C	G	G	G	C	C	A	A	C	A	G	G	T	G	T	C	G	G	A	C	T	G	C	A	G	G	C	G	T	C	C	A	T	T	G	C	C	G	A	T	T	C	T	C	A
O. SATIVA::IRGC 5779-1::[IRIS 313-10516]	IRIS 313-10516	IRGC 127689	indx	3	C	G	G	G	C	C	A	A	C	A	G	G	T	G	T	C	G	G	A	C	T	G	C	A	G	G	C	G	T	C	C	A	T	T	G	C	C	G	A	T	T	C	T	C	A
ADT 22::IRGC 5901-1::[IRIS 313-10519]	IRIS 313-10519	IRGC 135733	ind2	3	C	G	G	G	C	C	A	A	C	A	G	G	T	G	T	C	G	G	A	C	T	G	C	A	G	G	C	G	T	C	C	A	T	T	G	C	C	G	A	T	T	C	T	C	A
NATURAL HYBRID C 33-8::IRGC 5929-1::[IRIS 313-10520]	IRIS 313-10520		indx	3	C	G	G	G	C	C	A	A	C	A	G	G	T	G	T	C	G	G	A	C	T	G	C	A	G	G	C	G	T	C	C	A	T	T	G	C	C	G	A	T	T	C	T	C	A
SANNABATHA::IRGC 5971-1::[IRIS 313-10521]	IRIS 313-10521		aro	3	C	G	G	G	C	C	A	A	C	A	G	G	T	G	T	C	G	G	A	C	T	T	C	A	G	G	C	G	T	C	C	A	T	T	G	C	C	G	A	T	T	C	T	C	A
SUKAMANDI 1005::IRGC 6065-1::[IRIS 313-10522]	IRIS 313-10522		admix	2	C	G	G	G	C	C	A	A	C/T	A	G	G	T	G	T	C	G	G	A	C	T	T/G	C	A	G	G	C	A/G	T	C	C	A	T	T	G	C	C	G	A	T	T	C	T	C	A
PTB 18::IRGC 6105-1::[IRIS 313-10523]	IRIS 313-10523	IRGC 135786	indx	3	C	G	G	G	C	C	A	A	C	A	G	G	T	G	T	C	G	G	A	C	T	G	C	A	G	G	C	G	T	C	C	A	T	T	G	C	C	G	A	T	T	C	T	C	A
CO 2::IRGC 6186-2::[IRIS 313-10526]	IRIS 313-10526		ind2	3	C	G	G	G	C	C	A	A	C	A	G	G	T	G	T	C	G	G	A	C	T	G	C	A	G	G	C	G	T	C	C	A	T	T	G	C	C	G	A	T	T	C	T	C	A
ADT 12::IRGC 6254-1::[IRIS 313-10527]	IRIS 313-10527	IRGC 127107	ind2	4	C	G	G	G	C	C	A	A	C	A	G	G	T	G	T	C	G	G	A	C	T	G	C	A	G	G	C	G	T	C	C	A	T	T	G	G	C	G	A	T	T	C	T	C	A
GAMTI 1-34::IRGC 6479-2::[IRIS 313-10536]	IRIS 313-10536	IRGC 128041	ind2	4	C	G	G	G	C	C	A	A	C	A	G	G	T	G	T	C	G	G	A	C	T	G	C	A	G	G	C	G	T	C	C	A	T	T	G	G	C	G	A	T	T	C	T		A
BADAL 76::IRGC 6586-1::[IRIS 313-10539]	IRIS 313-10539	IRGC 127199	ind2	2	C	G	G	G	C	C	A	A	C	A	G	G	T				G	G	A	C	T	G	C	A	G	G	C				C	A	T	T	G	C	C	G	A	T	T	C	T	C	A
BELLO::IRGC 6658-2::[IRIS 313-10542]	IRIS 313-10542	IRGC 127992	ind2	3	C	G	G	G	C	C	A	A	C	A	G	G	T	G	T	C	G	G	A	C	T	G	C	A	G	G	C	G	T	C	C	A	T	T	G	C	C	G	A	T	T	C	T	C	A
DONGREM::IRGC 6688-1::[IRIS 313-10544]	IRIS 313-10544	IRGC 127340	ind2	4	C	G	G	G	C	C	A	A	C	A	G	G	T	G	T	C	G	G	A	C	T	G	C	A	G	G	C	G	T	C	C	A	T	T	G	G	C	G	A	T	T	C	T	C	A
C 34-13::IRGC 6797-2::[IRIS 313-10547]	IRIS 313-10547	IRGC 128007	indx	3	C	G	G	G	C	C	A	A	C	A	G	G	T	G	T	C	G	G	A	C	T	G	C	A	G	G	C	G	T	C	C	A	T	T	G	C	C	G	A	T	T	C	T	C	A
RATUA 81::IRGC 6829-1::[IRIS 313-10549]	IRIS 313-10549	IRGC 132039	aus	3	C	G	G	G	C	C	A	A	C	A	G	G	T	G	T	C	G	G	A	C	T	G	C	A	G	G	C	G	T	C	C	A	T	T	G	C	C	G	A	T	T	C	T	C	A
221 BC 4-1-45-10::IRGC 6865-1::[IRIS 313-10550]	IRIS 313-10550	IRGC 135561	indx	3	C	G	G	G	C	C	A	A	C	A	G	G	T	G	T	C	G	G	A	C	T	G	C	A	G	G	C	G	T	C	C	A	T	T	G	C	C	G	A	T	T	C	T	C	A
RL GOPHER::IRGC 6934-2::[IRIS 313-10552]	IRIS 313-10552	IRGC 128150	trop	3	C	G	G	G	C	C	A	A	C	A	G	G	T	G	T	C	G	G	A	C	T	T	C	A	G	G	C	G	T	C	C	A	T	T	G	C	C	G	A	T	T	C	T	C	A
LUA HUONG T 1::IRGC 7082-2::[IRIS 313-10555]	IRIS 313-10555	IRGC 128098	ind3	3	C	G	G	G	C	C	A	A	C	A	G	G	T	G	T	C	G	G	A	C	T	G	C	A	G	G	C	G	T	C	C	A	T	T	G	C	C	G	A	T	T	C	T	C	A
LITCHIKIANG::IRGC 7287-1::[IRIS 313-10558]	IRIS 313-10558	IRGC 128367	temp	3	C	G	G	G	C	C	A	A	C	A	G	G	T	G	T	C	G	G	A	C	T	T	C	A	G	G	C	G	T	C	C	A	T	T	G	C	C	G	A	T	T	C	T	C	A
FI LAI FENG::IRGC 7288-1::[IRIS 313-10559]	IRIS 313-10559	IRGC 127369	temp	3	C	G	G	G	C	C	A	A	C	A	G	G	T	G	T	C	G	G	A	C	T	T	C	A	G	G	C	G	T	C	C	A	T	T	G	C	C	G	A	T	T	C	T	C	A
SENG CHUI LIN::IRGC 7313-1::[IRIS 313-10562]	IRIS 313-10562	IRGC 128463	japx	3	C	G	G	G	C	C	A	A	C	A	G	G	T	G	T	C	G	G	A	C	T	T	C	A	G	G	C	G	T	C	C	A	T	T	G	C	C	G	A	T	T	C	T	C	A
SHA TIAO TSAO::IRGC 7339-1::[IRIS 313-10563]	IRIS 313-10563	IRGC 128469	temp	3	C	G	G	G	C	C	A	A	C	A	G	G	T	G	T	C	G	G	A	C	T	T	C	A	G	G	C	G	T	C	C	A	T	T	G	C	C	G	A	T	T	C	T	C	A
250 KUNGANI 1::IRGC 7370-1::[IRIS 313-10564]	IRIS 313-10564	IRGC 128209	temp	0	C	G	G	G	C	C	A	A	C	A	G	G	T	G	T	C	G	G	A	C	T	T	C	A	G	G	C	A	T	C	C	A	T	T	G	C	C	G	A	T	T	C	T	C	A
221 C 391-1-3-3::IRGC 7600-1::[IRIS 313-10566]	IRIS 313-10566	IRGC 127099	indx	3	C	G	G	G	C	C	A	A	C	A	G	G	T	G	T	C	G	G	A	C	T	G	C	A	G	G	C	G	T	C	C	A	T	T	G	C	C	G	A	T	T	C	T	C	A
OITA MII 120::IRGC 7696-1::[IRIS 313-10568]	IRIS 313-10568	IRGC 128414	temp	0	C	G	G	G	C	C	A	A	C	A	G	G	T	G	T	C	G	G	A	C	T	T	C	A	G	G	C	A	T	C	C	A	T	T	G	C	C	G	A	T	T	C	T	C	A
BEN KEI::IRGC 7769-1::[IRIS 313-10569]	IRIS 313-10569	IRGC 128240	temp	0	C	G	G	G	C	C	A	A	C	A	G	G	T	G	T	C	G	G	A	C	T	T	C	A	G	G	C	A	T	C	C	A	T	T	G	C	C	G	A	T	T	C	T	C	A
KOTHMALLI KARUPPAN::IRGC 7842-1::[IRIS 313-10572]	IRIS 313-10572	IRGC 127533	indx	3	C	G	G	G	C	C	A	A	C	A	G	G	T	G	T	C	G	G	A	C	T	G	C	A	G	G	C	G	T	C	C	A	T	T	G	C	C	G	A	T	T	C	T	C	A
SOSSOKA OULE::IRGC 7850-2::[IRIS 313-10573]	IRIS 313-10573	IRGC 128168	ind2	4	C	G	G	G	C	C	A	A	C	A	G	G	T	G	T	C	G	G	A	C	T	G	C	A	G	G	C	G	T	C	C	A	T	T	G	G	C	G	A	T	T	C	T	C	A
IFUGAO RICE::IRGC 8052-1::[IRIS 313-10577]	IRIS 313-10577	IRGC 128318	trop	3	C	G	G	G	C	C	A	A	C	A	G	G	T	G	T	C	G	G	A	C	T	T	C	A	G	G	C	G	T	C	C	A	T	T	G	C	C	G	A	T	T	C	T	C	A
PARAY QIKUG KABAYUH::IRGC 8059-1::[IRIS 313-10578]	IRIS 313-10578	IRGC 132028	trop	3	C	G	G	G	C	C	A	A	C	A	G	G	T	G	T	C	G	G	A	C	T	T	C	A	G	G	C	G	T	C	C	A	T	T	G	C	C	G	A	T	T	C	T	C	A
PARAY KINARABAW::IRGC 8083-1::[IRIS 313-10580]	IRIS 313-10580	IRGC 127718	trop	3	C	G	G	G	C	C	A	A	C	A	G	G	T	G	T	C	G	G	A	C	T	T	C	A	G	G	C	G	T	C	C	A	T	T	G	C	C	G	A	T	T	C	T	C	A
P PEY SIQAT::IRGC 8129-1::[IRIS 313-10581]	IRIS 313-10581	IRGC 127741	trop	1	C	G	G	G	C	C	A	A	T	A	G	G	T	G	T	C	G	G	A	C	T	T	C	A	G	G	C	A	T	C	C	A	T	T	G	C	C	G	A	T	T	C	T	C	A
QINOGNAS::IRGC 8135-1::[IRIS 313-10582]	IRIS 313-10582	IRGC 128440	trop	1	C	G	G	G	C	C	A	A	T	A	G	G	T	G	T	C	G	G	A	C	T	T	C	A	G	G	C	A	T	C	C	A	T	T	G	C	C	G	A	T	T	C	T	C	A
UKON NISHIKI::IRGC 8314-1::[IRIS 313-10585]	IRIS 313-10585	IRGC 128494	admix	0	C	G	G	G	C	C	A	A	C	A	G	G	T	G	T	C	G	G	A	C	T	T	C	A	G	G	C	A	T	C	C	A	T	T	G	C	C	G	A	T	T	C	T	C	A
DB 3::IRGC 8361-1::[IRIS 313-10587]	IRIS 313-10587	IRGC 127308	aus	3	C	G	G	G	C	C	A	A	C	A	G	G	T	G	T	C	G	G	A	C	T	G	C	A	G	G	C	G	T	C	C	A	T	T	G	C	C	G	A	T	T	C	T	C	A
DJ 69::IRGC 8482-1::[IRIS 313-10592]	IRIS 313-10592	IRGC 127324	aus	3	C	G	G	G	C	C	A	A	C	A	G	G	T	G	T	C	G	G	A	C	T	G	C	A	G	G	C	G	T	C	C	A	T	T	G	C	C	G	A	T	T	C	T	C	A
DJ 47::IRGC 8497-1::[IRIS 313-10593]	IRIS 313-10593	IRGC 127323	aus	3	C	G	G	G	C	C	A	A	C	A	G	G	T	G	T	C	G	G	A	C	T	G	C	A	G	G	C	G	T	C	C	A	T	T	G	C	C	G	A	T	T	C	T	C	A
DJ 29::IRGC 8505-1::[IRIS 313-10594]	IRIS 313-10594	IRGC 127322	aus	3	C	G	G	G	C	C	A	A	C	A	G	G	T	G	T	C	G	G	A	C	T	G	C	A	G	G	C	G	T	C	C	A	T	T	G	C	C	G	A	T	T	C	T	C	A
DL 5::IRGC 8593-1::[IRIS 313-10595]	IRIS 313-10595	IRGC 127327	aus	3	C	G	G	G	C	C	A	A	C	A	G	G	T	G	T	C	G	G	A	C	T	G	C	A	G	G	C	G	T	C	C	A	T	T	G	C	C	G	A	T	T	C	T	C	A
UCP 41::IRGC 8742-1::[IRIS 313-10600]	IRIS 313-10600	IRGC 128493	aus	3	C	G	G	G	C	C	A	A	C	A	G	G	T	G	T	C	G	G	A	C	T	G	C	A	G	G	C	G	T	C	C	A	T	T	G	C	C	G	A	T	T	C	T	C	A
DM 49::IRGC 8775-1::[IRIS 313-10602]	IRIS 313-10602	IRGC 127329	aus	3	C	G	G	G	C	C	A	A	C	A	G	G	T	G	T	C	G	G	A	C	T	G	C	A	G	G	C	G	T	C	C	A	T	T	G	C	C	G	A	T	T	C	T	C	A
DV 2::IRGC 8806-1::[IRIS 313-10604]	IRIS 313-10604	IRGC 127347	aus	3	C	G	G	G	C	C	A	A	C	A	G	G	T	G	T	C	G	G	A	C	T	G	C	A	G	G	C	G	T	C	C	A	T	T	G	C	C	G	A	T	T	C	T	C	A
DV 86::IRGC 8840-1::[IRIS 313-10605]	IRIS 313-10605	IRGC 127348	aus	3	C	G	G	G	C	C	A	A	C	A	G	G	T	G	T	C	G	G	A	C	T	G	C	A	G	G	C	G	T	C	C	A	T	T	G	C	C	G	A	T	T	C	T	C	A
DV 110::IRGC 8855-1::[IRIS 313-10606]	IRIS 313-10606	IRGC 127346	aus	3	C	G	G	G	C	C	A	A	C	A	G	G	T	G	T	C	G	G	A	C	T	G	C	A	G	G	C	G	T	C	C	A	T	T	G	C	C	G	A	T	T	C	T	C	A
MATHOLUWA::IRGC 8901-1::[IRIS 313-10609]	IRIS 313-10609	IRGC 127612	indx	4	C	G	G	G	C	C	A	A	C	A	G	G	T	G	T	C	G	G	A	C	T	G	C	A	G	G	C	G	T	C	C	A	T	T	G	G	C	G	A	T	T	C	T	C	A
ALAGUSAMBA::IRGC 8944-2::[IRIS 313-10610]	IRIS 313-10610	IRGC 132315	ind2	3	C	G	G	G	C	C	A	A	C	A	G	G	T	G	T	C	G	G	A	C	T	G	C	A	G	G	C	G	T	C	C	A	T	T	G	C	C	G	A	T	T	C	T	C	A
KARA SHALI::IRGC 9293-1::[IRIS 313-10617]	IRIS 313-10617	IRGC 131998	temp	3	C	G	G	G	C	C	A	A	C	A	G	G	T	G	T	C	G	G	A	C	T	T	C	A	G	G	C	G	T	C	C	A	T	T	G	C	C	G	A	T	T	C	T	C	A
CHINES::IRGC 9316-1::[IRIS 313-10618]	IRIS 313-10618	IRGC 128261	temp	0	C	G	G	G	C	C	A	A	C	A	G	G	T	G	T	C	G	G	A	C	T	T	C	A	G	G	C	A	T	C	C	A	T	T	G	C	C	G	A	T	T	C	T	C	A
BICCO BRANCO::IRGC 9478-1::[IRIS 313-10619]	IRIS 313-10619	IRGC 127225	trop	3	C	G	G	G	C	C	A	A	C	A	G	G	T	G	T	C	G	G	A	C	T	T	C	A	G	G	C	G	T	C	C	A	T	T	G	C	C	G	A	T	T	C	T	C	A
R 27::IRGC 9498-1::[IRIS 313-10620]	IRIS 313-10620	IRGC 128443	trop	1	C	G	G	G	C	C	A	A	T	A	G	G	T	G	T	C	G	G	A	C	T	T	C	A	G	G	C	A	T	C	C	A	T	T	G	C	C	G	A	T	T	C	T	C	A
SHINCHIKU IKU 97::IRGC 10429-1::[IRIS 313-10631]	IRIS 313-10631	IRGC 127798	temp	0	C	G	G	G	C	C	A	A	C	A	G	G	T	G	T	C	G	G	A	C	T	T	C	A	G	G	C	A	T	C	C	A	T	T	G	C	C	G	A	T	T	C	T	C	A
SR 26 B::IRGC 10803-2::[IRIS 313-10640]	IRIS 313-10640	IRGC 128169	ind2	3	C	G	G	G	C	C	A	A	C	A	G	G	T	G	T	C	G	G	A	C	T	T	C	A	G	G	C	G	T	C	C	A	T	T	G	C	C	G	A	T	T	C	T	C	A
SACHIKAZE::IRGC 10891-1::[IRIS 313-10642]	IRIS 313-10642	IRGC 128455	temp	0	C	G	G	G	C	C	A	A	C	A	G	G	T	G	T	C	G	G	A	C	T	T	C	A	G	G	C	A	T	C	C	A	T	T	G	C	C	G	A	T	T	C	T	C	A
BUSIYETAN::IRGC 11205-1::[IRIS 313-10644]	IRIS 313-10644	IRGC 128249	trop	3	C	G	G	G	C	C	A	A	C	A	G	G	T	G	T	C	G	G	A	C	T	T	C	A	G	G	C	G	T	C	C	A	T	T	G	C	C	G	A	T	T	C	T	C	A
LENKIBE-N::IRGC 11216-1::[IRIS 313-10645]	IRIS 313-10645	IRGC 128359	trop	3	C	G	G	G	C	C	A	A	C	A	G	G	T	G	T	C	G	G	A	C	T	T	C	A	G	G	C	G	T	C	C	A	T	T	G	C	C	G	A	T	T	C	T	C	A
RACION 1::IRGC 11340-1::[IRIS 313-10649]	IRIS 313-10649	IRGC 127758	trop	1	C	G	G	G	C	C	A	A	T	A	G	G	T	G	T	C	G	G	A	C	T	T	C	A	G	G	C	A	T	C	C	A	T	T	G	C	C	G	A	T	T	C	T	C	A
NAHNG PRAYAH 132::IRGC 11470-1::[IRIS 313-10650]	IRIS 313-10650		ind3	3	C	G	G	G	C	C	A	A	C	A	G	G	T	G	T	C	G	G	A	C	T	G	C	A	G	G	C	G	T	C	C	A	T	T	G	C	C	G	A	T	T	C	T	C	A
PHOU SAO LEUM NYANG::IRGC 11570-2::[IRIS 313-10651]	IRIS 313-10651	IRGC 128134	indx	3	C	G	G	G	C	C	A	A	C	A	G	G	T	G	T	C	G	G	A	C	T	G	C	A	G	G	C	G	T	C	C	A	T	T	G	C	C	G	A	T	T	C	T	C	A
MAK KHEUA::IRGC 11628-1::[IRIS 313-10653]	IRIS 313-10653		subtrop	3	C	G	G	G	C	C	A	A	C	A	G	G	T	G	T	C	G	G	A	C	T	T	C	A	G	G	C	G	T	C	C	A	T	T	G		C	G	A	T	T	C	T	C	A
KA SAEN::IRGC 11642-1::[IRIS 313-10654]	IRIS 313-10654	IRGC 128335	ind3	3	C	G	G	G	C	C	A	A	C	A	G	G	T	G	T	C	G	G	A	C	T	G	C	A	G	G	C	G	T	C	C	A	T	T	G	C	C	G	A	T	T	C	T	C	A
EA HOUM::IRGC 11783-1::[IRIS 313-10655]	IRIS 313-10655	IRGC 128285	indx	2.5	C	G	G	G	C	C	A	A	C	A	G	G	T	G	T	C	G	G	A	C	T	G	C	A	G	G	C	A/G	T	C	C	A	T	T	G	C	C	G	A	T	T	C	T	C	A
THANGONE::IRGC 11816-1::[IRIS 313-10657]	IRIS 313-10657	IRGC 135801	subtrop	0	C	G	G	G	C	C	A	A	C	A	G	G	T	G	T	C	G	G	A	C	T	T	C	A	G	G	C	A	T	C	C	A	T	T	G	C	C	G	A	T	T	C	T	C	A
LONG MA::IRGC 11867-1::[IRIS 313-10659]	IRIS 313-10659	IRGC 127574	ind3	3	C	G	G	G	C	C	A	A	C	A	G	G	T	G	T	C	G	G	A	C	T	G	C	A	G	G	C	G	T	C	C	A	T	T	G	C	C	G	A	T	T	C	T	C	A
SAMBA::IRGC 11993-1::[IRIS 313-10661]	IRIS 313-10661	IRGC 127781	ind2	3	C	G	G	G	C	C	A	A	C	A	G	G	T	G	T	C	G	G	A	C	T	G	C	A	G	G	C	G	T	C	C	A	T	T	G	C	C	G	A	T	T	C	T	C	A
KAHATAWEE::IRGC 12004-1::[IRIS 313-10662]	IRIS 313-10662	IRGC 127476	ind2	4	C	G	G	G	C	C	A	A	C	A	G	G	T	G	T	C	G	G	A	C	T	G	C	A	G	G	C	G	T	C	C	A	T	T	G	G	C	G	A	T	T	C	T	C	A
ARC 6218::IRGC 12255-1::[IRIS 313-10666]	IRIS 313-10666	IRGC 127164	indx	3	C	G	G	G	C	C	A	A	C	A	G	G	T	G	T	C	G	G	A	C	T	G	C	A	G	G	C	G	T	C	C	A	T	T	G	C	C	G	A	T	T	C	T	C	A
ARC 7236::IRGC 12335-1::[IRIS 313-10667]	IRIS 313-10667	IRGC 127168	ind2	3	C	G	G	G	C	C	A	A	C	A	G	G	T	G	T	C	G	G	A	C	T	G	C	A	G	G	C	G	T	C	C	A	T	T	G	C	C	G	A	T	T	C	T	C	A
ARC 7255::IRGC 12343-2::[IRIS 313-10668]	IRIS 313-10668	IRGC 127974	indx	3	C	G	G	G	C	C	A	A	C	A	G	G	T	G	T	C	G	G	A	C	T	G	C	A	G	G	C	G	T	C	C	A	T	T	G	C	C	G	A	T	T	C	T	C	A
ARC 10296::IRGC 12421-2::[IRIS 313-10670]	IRIS 313-10670	IRGC 132317	aro	3	C	G	G	G	C	C	A	A	C	A	G	G	T	G	T	C	G	G	A	C	T	T	C	A	G	G	C	G	T	C	C	A	T	T	G	C	C	G	A	T	T	C	T	C	A
ARC 10843::IRGC 12653-1::[IRIS 313-10673]	IRIS 313-10673	IRGC 127130	aus	3	C	G	G	G	C	C	A	A	C	A	G	G	T	G	T	C	G	G	A	C	T	G	C	A	G	G	C	G	T	C	C	A	T	T	G	C	C	G	A	T	T	C	T	C	A
ARC 10846::IRGC 12656-2::[IRIS 313-10674]	IRIS 313-10674	IRGC 127932	indx	3	C	G	G	G	C	C	A	A	C	A	G	G	T	G	T	C	G	G	A	C	T	G	C	A	G	G	C	G	T	C	C	A	T	T	G	C	C	G	A	T	T	C	T	C	A
DEWAMINORI::IRGC 12743-1::[IRIS 313-10677]	IRIS 313-10677	IRGC 128277	temp	0	C	G	G	G	C	C	A	A	C	A	G	G	T	G	T	C	G	G	A	C	T	T	C	A	G	G	C	A	T	C	C	A	T	T	G	C	C	G	A	T	T	C	T	C	A
MAKALIOKA::IRGC 12781-2::[IRIS 313-10678]	IRIS 313-10678	IRGC 132353	ind2	3	C	G	G	G	C	C	A	A	C	A	G	G	T	G	T	C	G	G	A	C	T	T	C	A	G	G	C	G	T	C	C	A	T	T	G	C	C	G	A	T	T	C	T	C	A
KHAI DO::IRGC 12903-2::[IRIS 313-10679]	IRIS 313-10679	IRGC 132345	subtrop	0	C	G	G	G	C	C	A	A	C	A	G	G	T	G	T	C	G	G	A	C	T	T	C	A	G	G	C	A	T	C	C	A	T		G	C	C	G	A	T	T	C	T	C	A
KHAN THAI DO::IRGC 12990-1::[IRIS 313-10681]	IRIS 313-10681	IRGC 128338	ind3	3	C	G	G	G	C	C	A	A	C	A	G	G	T	G	T	C	G	G	A	C	T	G	C	A	G	G	C	G	T	C	C	A	T	T	G	C	C	G	A	T	T	C	T	C	A
PA KHENG::IRGC 12996-1::[IRIS 313-10682]	IRIS 313-10682	IRGC 127707	ind3	3	C	G	G	G	C	C	A	A	C	A	G	G	T	G	T	C	G	G	A	C	T	G	C	A	G	G	C	G	T	C	C	A	T	T	G	C	C	G	A	T	T	C	T	C	A
NGAN TIA::IRGC 13010-1::[IRIS 313-10683]	IRIS 313-10683	IRGC 127674	ind3	3	C	G	G	G	C	C	A	A	C	A	G	G	T	G	T	C	G	G	A	C	T	G	C	A	G	G	C	G	T	C	C	A	T	T	G	C	C	G	A	T	T	C	T	C	A
BONGOLON::IRGC 13094-1::[IRIS 313-10684]	IRIS 313-10684	IRGC 135740	ind3	3	C	G	G	G	C	C	A	A	C	A	G	G	T	G	T	C	G	G	A	C	T	G	C	A	G	G	C	G	T	C	C	A	T	T	G	C	C	G	A	T	T	C	T	C	A
SIKEP BATU::IRGC 13514-2::[IRIS 313-10689]	IRIS 313-10689	IRGC 128165	trop	1	C	G	G	G	C	C	A	A	T	A	G	G	T	G	T	C	G	G	A	C	T	T	C	A	G	G	C	A	T	C	C	A	T	T	G	C	C	G	A	T	T	C	T	C	A
SEREH::IRGC 13732-2::[IRIS 313-10693]	IRIS 313-10693	IRGC 132268	trop	1	C	G	G	G	C	C	A	A	T	A	G	G	T	G	T	C	G	G	A	C	T	T	C	A	G	G	C	A	T	C	C	A	T	T	G	C	C	G	A	T	T	C	T	C	A
HAJI HARUN 38::IRGC 13827-2::[IRIS 313-10694]	IRIS 313-10694	IRGC 128047	ind3	3	C	G	G	G	C	C	A	A	C	A	G	G	T	G	T	C	G	G	A	C	T	G	C	A	G	G	C	G	T	C	C	A	T	T	G	C	C	G	A	T	T	C	T	C	A
TOLIL 14::IRGC 13836-2::[IRIS 313-10695]	IRIS 313-10695	IRGC 128191	ind3	3	C	G	G	G	C	C	A	A	C	A	G	G	T	G	T	C	G	G	A	C	T	G	C	A	G	G	C	G	T	C	C	A	T	T	G	C	C	G	A	T	T	C	T	C	A
SIAM ER 16::IRGC 13910-2::[IRIS 313-10697]	IRIS 313-10697		ind3	3	C	G	G	G	C	C	A	A	C	A	G	G	T	G	T	C	G	G	A	C	T	G	C	A	G	G	C	G	T	C	C	A	T	T	G	C	C	G	A	T	T	C	T	C	A
BUJANG::IRGC 14040-1::[IRIS 313-10699]	IRIS 313-10699		ind3	4	C	G	G	G	C	C	A	A	C	A	G	G	T	G	T	C	G	G	A	C	T	G	C	A	G	G	C	G	T	C	C	A	T	T	G	G	C	G	A	T	T	C	T	C	A
RADIN EBOS 35::IRGC 14204-1::[IRIS 313-10701]	IRIS 313-10701		ind3	3	C	G	G	G	C	C	A	A	C	A	G	G	T	G	T	C	G	G	A	C	T	G	C	A	G	G	C	G	T	C	C	A	T	T	G	C	C	G	A	T	T	C	T	C	A
PADI DARAWAL::IRGC 14373-1::[IRIS 313-10704]	IRIS 313-10704	IRGC 128419	trop	1	C	G	G	G	C	C	A	A	T	A	G	G	T	G	T	C	G	G	A	C	T	T	C	A	G	G	C	A	T	C	C	A	T	T		C	C	G	A	T	T	C	T	C	A
ANAK CHINA::IRGC 14479-1::[IRIS 313-10706]	IRIS 313-10706		ind3	3	C	G	G	G	C	C	A	A	C	A	G	G	T	G	T	C	G	G	A	C	T	G	C	A	G	G	C	G	T	C	C	A	T	T	G	C	C	G	A	T	T	C	T	C	A
ANAK DIDEK::IRGC 14491-1::[IRIS 313-10707]	IRIS 313-10707		ind3	3	C	G	G	G	C	C	A	A	C	A	G	G	T	G	T	C	G	G	A	C	T	G	C	A	G	G	C	G	T	C	C	A	T	T	G	C	C	G	A	T	T	C	T	C	A
7 AC::IRGC 14860-2::[IRIS 313-10711]	IRIS 313-10711	IRGC 132314	trop	3	C	G	G	G	C	C	A	A	C	A	G	G	T	G	T	C	G	G	A	C	T	T	C	A	G	G	C	G	T	C	C	A	T	T	G	C	C	G	A	T	T	C	T	C	A
KOTO OURA S 5::IRGC 15155-1::[IRIS 313-10712]	IRIS 313-10712	IRGC 128354	trop	3	C	G	G	G	C	C	A	A	C	A	G	G	T	G	T	C	G	G	A	C	T	T	C	A	G	G	C	G	T	C	C	A	T	T	G	C	C	G	A	T	T	C	T	C	A
SUDU KARAYAL::IRGC 15348-1::[IRIS 313-10715]	IRIS 313-10715	IRGC 127827	ind2	3	C	G	G	G	C	C	A	A	C	A	G	G	T	G	T	C	G	G	A	C	T	G	C	A	G	G	C	G	T	C	C	A	T	T	G	C	C	G	A	T	T	C	T	C	A
MURUNGA::IRGC 15428-1::[IRIS 313-10716]	IRIS 313-10716	IRGC 127640	ind2	4	C	G	G	G	C	C	A	A	C	A	G	G	T	G	T	C	G	G	A	C	T	G	C	A	G	G	C	G	T	C	C	A	T	T	G	G	C	G	A	T	T	C	T	C	A
PERIYA VELLAI::IRGC 15475-1::[IRIS 313-10717]	IRIS 313-10717	IRGC 127725	ind2	3	C	G	G	G	C	C	A	A	C	A	G	G	T	G	T	C	G	G	A	C	T	G	C	A	G	G	C	G	T	C	C	A	T	T	G	C	C	G	A	T	T	C	T	C	A
KARUTHA SEENATI::IRGC 15515-2::[IRIS 313-10718]	IRIS 313-10718	IRGC 128073	aus	3	C	G	G	G	C	C	A	A	C	A	G	G	T	G	T	C	G	G	A	C	T	G	C	A	G	G	C	G	T	C	C	A	T	T	G	C	C	G	A	T	T	C	T	C	A
VELLAI KOLOMBAN::IRGC 15517-1::[IRIS 313-10719]	IRIS 313-10719	IRGC 127886	ind2	3	C	G	G	G	C	C	A	A	C	A	G	G	T	G	T	C	G	G	A	C	T	G	C	A	G	G	C	G	T	C	C	A	T	T	G	C	C	G	A	T	T	C	T	C	A
HEENDIKWEE::IRGC 15587-2::[IRIS 313-10720]	IRIS 313-10720	IRGC 132337	indx	4	C	G	G	G	C	C	A	A	C	A	G	G	T	G	T	C	G	G	A	C	T	G	C	A	G	G	C	G	T	C	C	A	T	T	G	G	C	G	A	T	T	C	T	C	A
HALSUDU HEENATI::IRGC 15599-1::[IRIS 313-10721]	IRIS 313-10721	IRGC 127401	ind2	3	C	G	G	G	C	C	A	A	C	A	G	G	T	G	T	C	G	G	A	C	T	G	C	A	G	G	C	G	T	C	C	A	T	T	G	C	C	G	A	T	T	C	T	C	A
MOND BA::IRGC 15813-2::[IRIS 313-10723]	IRIS 313-10723	IRGC 128111	ind2	4	C	G	G	G	C	C	A	A	C	A	G	G	T	G	T	C	G	G	A	C	T	G	C	A	G	G	C	G	T	C	C	A	T	T	G	G	C	G	A	T	T	C	T	C	A
MOUSOIR::IRGC 15866-1::[IRIS 313-10724]	IRIS 313-10724		ind3	3	C	G	G	G	C	C	A	A	C	A	G	G	T	G	T	C	G	G	A	C	T	G	C	A	G	G	C	G	T	C	C	A	T	T	G	C	C	G	A	T	T	C	T	C	A
POTO BALA::IRGC 15986-2::[IRIS 313-10726]	IRIS 313-10726	IRGC 128139	ind3	3	C	G	G	G	C	C	A	A	C	A	G	G	T	G	T	C	G	G	A	C	T	G	C	A	G	G	C	G	T	C	C	A	T	T	G	C	C	G	A	T	T	C	T	C	A
OUSSANTHIABA::IRGC 16046-2::[IRIS 313-10728]	IRIS 313-10728	IRGC 132261	indx	3	C	G	G	G	C	C	A	A	C	A	G	G	T	G	T	C	G	G	A	C	T	G	C	A	G	G	C	G	T	C	C	A	T	T	G	C	C	G	A	T	T	C	T	C	A
NANIBRE::IRGC 16102-2::[IRIS 313-10730]	IRIS 313-10730	IRGC 132258	trop	3	C	G	G	G	C	C	A	A	C	A	G	G	T	G	T	C	G	G	A	C	T	T	C	A	G	G	C	G	T	C	C	A	T	T	G	C	C	G	A	T	T	C	T	C	A
MADHUWA KARIA::IRGC 16138-2::[IRIS 313-10732]	IRIS 313-10732	IRGC 128102	aro	3	C	G	G	G	C	C	A	A	C	A	G	G	T	G	T	C	G	G	A	C	T	T	C	A	G	G	C	G	T	C	C	A	T	T	G	C	C	G	A	T	T	C	T	C	A
MOTANGE PAHELLO LAULE::IRGC 16160-1::[IRIS 313-10733]	IRIS 313-10733	IRGC 127634	indx	2.5	C	G	G	G	C	C	A	A	C	A	G	G	T	G	T	C	G	G	A	C	T	T/G	C	A	G	G	C	G	T	C	C	A	T	T	G	C	C	G	A	T	T	C	T	C	A
DEVARASI::IRGC 16173-1::[IRIS 313-10734]	IRIS 313-10734	IRGC 127315	aus	3	C	G	G	G	C	C	A	A	C	A	G	G	T	G	T	C	G	G	A	C	T	G	C	A	G	G	C	G	T	C	C	A	T	T	G	C	C	G	A	T	T	C	T	C	A
LAL SAR::IRGC 16185-1::[IRIS 313-10735]	IRIS 313-10735	IRGC 127546	aus	3	C	G	G	G	C	C	A	A	C	A	G	G	T	G	T	C	G	G	A	C	T	G	C	A	G	G	C	G	T	C	C	A	T	T	G	C	C	G	A	T	T	C	T	C	A
RERM BILASH::IRGC 16273-2::[IRIS 313-10736]	IRIS 313-10736	IRGC 128149	aus	3	C	G	G	G	C	C	A	A	C	A	G	G	T	G	T	C	G	G	A	C	T	G	C	A	G	G	C	G	T	C	C	A	T	T		C	C	G	A	T	T	C	T	C	A
GOGO::IRGC 16418-1::[IRIS 313-10739]	IRIS 313-10739	IRGC 135567	indx	3	C	G	G	G	C	C	A	A	C	A	G	G	T	G	T	C	G	G	A	C	T	T/G	C	A	G	G	C	G	T	C	C	A	T	T	G	C	C	G	A	T	T	C	T	C	A
KETAN PAPAH AREN::IRGC 16467-1::[IRIS 313-10740]	IRIS 313-10740	IRGC 127508	trop	3	C	G	G	G	C	C	A	A	C	A	G	G	T	G	T	C	G	G	A	C	T	G	C	A	G	G	C	G	T	C	C	A	T	T	G	C	C	G	A	T	T	C	T	C	A
KETAN PELERN::IRGC 16468-1::[IRIS 313-10741]	IRIS 313-10741	IRGC 127509	trop	3	C	G	G	G	C	C	A	A	C	A	G	G	T	G	T	C	G	G	A	C	T	G	C	A	G	G	C	G	T	C	C	A	T	T	G	C	C	G	A	T	T	C	T	C	A
SIPON::IRGC 16570-1::[IRIS 313-10744]	IRIS 313-10744	IRGC 127811	trop	1	C	G	G	G	C	C	A	A	T	A	G	G	T	G	T	C	G	G	A	C	T	T	C	A	G	G	C	A	T	C	C	A	T	T	G	C	C	G	A	T	T	C	T	C	A
SLOBOK::IRGC 16571-1::[IRIS 313-10745]	IRIS 313-10745	IRGC 127818	trop	1	C	G	G	G	C	C	A	A	T	A	G	G	T	G	T	C	G	G	A	C	T	T	C	A	G	G	C	A	T	C	C	A	T	T	G	C	C	G	A	T	T	C	T	C	A
TJEMPO KREMBUNG::IRGC 16603-1::[IRIS 313-10746]	IRIS 313-10746		trop	1	C	G	G	G	C	C	A	A	T	A	G	G	T	G	T	C	G	G	A	C	T	T	C	A	G	G	C	A	T	C	C	A	T	T	G	C	C	G	A	T	T	C	T	C	A
TJOKRON::IRGC 16653-2::[IRIS 313-10747]	IRIS 313-10747	IRGC 136111	trop	3	C	G	G	G	C	C	A	A	C	A	G	G	T	G	T	C	G	G	A	C	T	T	C	A	G	G	C	G	T	C	C	A	T	T	G	C	C	G	A	T	T	C	T	C	A
PEUAK NAM 43::IRGC 17129-1::[IRIS 313-10757]	IRIS 313-10757		ind3	3	C	G	G	G	C	C	A	A	C	A	G	G	T		T	C	G	G	A	C	T	G	C	A	G	G	C	G	T	C	C	A	T	T	G	C	C	G	A	T	T	C	T	C	A
AEN METAN::IRGC 17142-1::[IRIS 313-10758]	IRIS 313-10758	IRGC 132386	trop	1	C	G	G	G	C	C	A	A	T	A	G	G	T	G	T	C	G	G	A	C	T	T	C	A	G	G	C	A	T	C	C	A	T	T	G	C	C	G	A	T	T	C	T	C	A
ATJEH::IRGC 17174-1::[IRIS 313-10760]	IRIS 313-10760		ind3	3	C	G	G	G	C	C	A	A	C	A	G	G	T	G	T	C	G	G	A	C	T	G	C	A	G	G	C	G	T	C	C	A	T	T	G	C	C	G	A	T	T	C	T	C	A
BALIK SEMAH::IRGC 17201-2::[IRIS 313-10761]	IRIS 313-10761	IRGC 127984	trop	1	C	G	G	G	C	C	A	A	T	A	G	G	T	G	T	C	G	G	A	C	T	T	C	A	G	G	C	A	T	C	C	A	T	T	G	C	C	G	A	T	T	C	T	C	A
CERE KAWAT::IRGC 17401-2::[IRIS 313-10765]	IRIS 313-10765	IRGC 128010	trop	1	C	G	G	G	C	C	A	A	T	A	G	G	T	G	T	C	G	G	A	C	T	T	C	A	G	G	C	A	T	C	C	A	T	T	G	C	C	G	A	T	T	C	T	C	A
DJALAWARA::IRGC 17471-1::[IRIS 313-10766]	IRIS 313-10766	IRGC 127325	trop	1	C	G	G	G	C	C	A	A	T	A	G	G	T	G	T	C	G	G	A	C	T	T	C	A	G	G	C	A	T	C	C	A	T	T	G	C	C	G	A	T	T	C	T	C	A
DJANGGOT::IRGC 17491-2::[IRIS 313-10767]	IRIS 313-10767	IRGC 128032	trop	1	C	G	G	G	C	C	A	A	T	A	G	G	T	G	T	C	G	G	A	C	T	T	C	A	G	G	C	A	T	C	C	A	T	T	G	C	C	G	A	T	T	C	T	C	A
GAJA BARU::IRGC 17586-1::[IRIS 313-10769]	IRIS 313-10769	IRGC 127375	indx	3	C	G	G	G	C	C	A	A	C	A	G	G	T	G	T	C	G	G	A	C	T	G	C	A	G	G	C	G	T	C	C	A	T	T	G	C	C	G	A	T	T	C	T	C	A
GANDAMANA::IRGC 17593-2::[IRIS 313-10770]	IRIS 313-10770	IRGC 128042	trop	1	C	G	G	G	C	C	A	A	T	A	G	G	T	G	T	C	G	G	A	C	T	T	C	A	G	G	C	A	T	C	C	A	T	T	G	C	C	G	A	T	T	C	T	C	A
GOGO RAJAPAN::IRGC 17666-2::[IRIS 313-10771]	IRIS 313-10771		trop	2	C	G	G	G	C	C	A	A	C	A	G	G	T	G	T	C	G	G	A	C	T		C	A	G	G	C	A/G	T		C	A	T	T	G	C	C	G	A	T	T	C	T	C	A
GOJOT::IRGC 17669-1::[IRIS 313-10772]	IRIS 313-10772	IRGC 127388	ind3	3	C	G	G	G	C	C	A	A	C	A	G	G	T	G	T	C	G	G	A	C	T	G	C	A	G	G	C	G	T	C	C	A	T	T	G	C	C	G	A	T	T	C	T	C	A
HAWARA DJEDAH::IRGC 17728-1::[IRIS 313-10773]	IRIS 313-10773	IRGC 131989	trop	1	C	G	G	G	C	C	A	A	T	A	G	G	T	G	T	C	G	G	A	C	T	T	C	A	G	G	C	A	T	C	C	A	T	T	G	C	C	G	A	T	T	C	T	C	A
KABADOKA::IRGC 17775-2::[IRIS 313-10776]	IRIS 313-10776	IRGC 132343	trop	0	C	G	G	G	C	C	A	A		A	G	G	T	G	T	C	G	G	A	C	T	T	C	A	G	G	C	A			C	A	T	T	G	C	C	G	A	T	T	C	T	C	A
KAMAS::IRGC 17785-1::[IRIS 313-10777]	IRIS 313-10777	IRGC 127483	ind3	3	C	G	G	G	C	C	A	A	C	A	G	G	T	G	T	C	G	G	A	C	T	G	C	A	G	G	C	G	T	C	C	A	T	T	G	C	C	G	A	T	T	C	T	C	A
KENTJANA MAHANG::IRGC 17818-1::[IRIS 313-10778]	IRIS 313-10778		ind3	4	C	G	G	G	C	C	A	A	C	A	G	G	T	G	T	C	G	G	A	C	T	G	C	A	G	G	C	G	T	C	C	A	T	T	G	G	C	G	A	T	T	C	T	C	A
KETAN LALER::IRGC 17897-1::[IRIS 313-10780]	IRIS 313-10780	IRGC 127505	trop	1	C	G	G	G	C	C	A	A	T	A	G	G	T	G	T	C	G	G	A	C	T	T	C	A	G	G	C	A	T	C	C	A	T	T	G	C	C	G	A	T	T	C	T	C	A
KETAN MLANTING::IRGC 17916-1::[IRIS 313-10781]	IRIS 313-10781	IRGC 127506	trop	1	C	G	G	G	C	C	A	A	T	A	G	G	T	G	T	C	G	G	A	C	T	T	C	A	G	G	C	A	T	C	C	A	T	T	G	C	C	G	A	T	T	C	T	C	A
KETAN NARIS::IRGC 17925-2::[IRIS 313-10782]	IRIS 313-10782	IRGC 128078	ind3	4	C	G	G	G	C	C	A	A	C	A	G	G	T	G	T	C	G	G	A	C	T	G	C	A	G	G	C	G	T	C	C	A	T	T	G	G	C	G	A	T	T	C	T	C	A
KETAN OSOG::IRGC 17929-1::[IRIS 313-10783]	IRIS 313-10783	IRGC 127507	trop	0	C	G	G	G	C	C	A	A		A	G	G	T	G	T	C	G	G	A	C	T	T	C	A	G	G	C	A	T	C	C	A	T	T	G	C	C	G	A	T	T	C	T	C	A
KETAN SAPI::IRGC 17954-2::[IRIS 313-10784]	IRIS 313-10784	IRGC 128079	trop	1	C	G	G	G	C	C	A	A	T	A	G	G	T	G	T	C	G	G	A	C	T	T	C	A	G	G	C	A	T	C	C	A	T	T	G	C	C	G	A	T	T	C	T	C	A
KETAN SLAWI::IRGC 17963-1::[IRIS 313-10785]	IRIS 313-10785	IRGC 127510	trop	3	C	G	G	G	C	C	A	A	C	A	G	G	T	G	T	C	G	G	A	C	T	G	C	A	G	G	C	G	T	C	C	A	T	T	G	C	C	G	A	T	T	C	T	C	A
KETAN URANG::IRGC 17980-1::[IRIS 313-10786]	IRIS 313-10786		ind3	3	C	G	G	G	C	C	A	A	C	A	G	G	T	G	T	C	G	G	A	C	T	G	C	A	G	G	C	G	T	C	C	A	T	T	G	C	C	G	A	T	T	C	T	C	A
LEMUNGSIR::IRGC 18116-1::[IRIS 313-10788]	IRIS 313-10788	IRGC 135769	trop	0	C	G	G	G	C	C	A	A	C	A	G	G	T				G	G	A	C	T	T	C	A	G	G	C	A	T	C	C	A	T	T	G	C	C	G	A	T	T	C	T	C	A
LENGGANG GENUK BULU::IRGC 18119-1::[IRIS 313-10789]	IRIS 313-10789	IRGC 132009	trop	1	C	G	G	G	C	C	A	A	T	A	G	G	T	G	T	C	G	G	A	C	T	T	C	A	G	G	C	A	T	C	C	A	T	T	G	C	C	G	A	T	T	C	T	C	A
LOLAWAJI::IRGC 18131-1::[IRIS 313-10790]	IRIS 313-10790		trop	0	C	G	G	G	C	C	A	A	C	A	G	G	T	G	T	C	G	G	A	C	T	T	C	A	G	G	C	A	T	C	C	A	T	T	G	C	C	G	A	T	T	C	T	C	A
MELIK::IRGC 18238-2::[IRIS 313-10793]	IRIS 313-10793	IRGC 132257	trop	3	C	G	G	G	C	C	A	A	C	A	G	G	T	G	T	C	G	G	A	C	T	T	C	A	G	G	C	G	T	C	C	A	T	T	G	C	C	G	A	T	T	C	T	C	A
MENDUNGAN::IRGC 18245-1::[IRIS 313-10794]	IRIS 313-10794	IRGC 127624	trop	3	C	G	G	G	C	C	A	A	C	A	G	G	T	G	T	C	G	G	A	C	T	T	C	A	G	G	C	G	T	C	C	A	T	T	G	C	C	G	A	T	T	C	T	C	A
MLATI::IRGC 18278-1::[IRIS 313-10795]	IRIS 313-10795	IRGC 128389	trop	3	C	G	G	G	C	C	A	A	C	A	G	G	T	G	T	C	G	G	A	C	T	T	C	A	G	G	C	G	T	C	C	A	T	T	G	C	C	G	A	T	T	C	T	C	A
NOGO BELE 2::IRGC 18328-2::[IRIS 313-10798]	IRIS 313-10798	IRGC 135640	trop	1	C	G	G	G	C	C	A		T	A	G	G	T	G	T	C	G	G	A	C	T	T	C	A	G	G	C	A	T	C	C	A	T	T	G	C	C	G	A	T	T	C	T	C	A
PAE ONGGA::IRGC 18418-1::[IRIS 313-10799]	IRIS 313-10799	IRGC 127704	trop	3	C	G	G	G	C	C	A	A	C	A	G	G	T	G	T	C	G	G	A	C	T	T	C	A	G	G	C	G	T	C	C	A	T	T	G	C	C	G	A	T	T	C	T	C	A
PALOTAN MELATI::IRGC 18426-2::[IRIS 313-10800]	IRIS 313-10800	IRGC 128127	trop	1	C	G	G	G	C	C	A	A	T	A	G	G	T	G	T	C	G	G	A	C	T	T	C	A	G	G	C	A	T	C	C	A	T	T	G	C	C	G	A	T	T	C	T	C	A
PEUTEUJ::IRGC 18484-1::[IRIS 313-10802]	IRIS 313-10802		trop	1	C	G	G	G	C	C	A	A	T	A	G	G	T	G	T	C	G	G	A	C	T	T	C	A	G	G	C	A	T	C	C	A	T	T	G	C	C	G	A	T	T	C	T	C	A
PLAMPEYAN::IRGC 18494-1::[IRIS 313-10803]	IRIS 313-10803		trop	1	C	G	G	G	C	C	A	A	T	A	G	G	T	G	T	C	G	G	A	C	T	T	C	A	G	G	C	A	T	C	C	A	T	T	G	C	C	G	A	T	T	C	T	C	A
PULO::IRGC 18519-1::[IRIS 313-10805]	IRIS 313-10805	IRGC 127746	trop	1	C	G	G	G	C	C	A	A	T	A	G	G	T	G	T	C	G	G	A	C	T	T	C	A	G	G	C	A	T	C	C	A	T	T	G	C	C	G	A	T	T	C	T	C	A
RANTE::IRGC 18608-2::[IRIS 313-10808]	IRIS 313-10808	IRGC 128147	trop	1	C	G	G	G	C	C	A	A	T	A	G	G	T	G	T	C	G	G	A	C	T	T	C	A	G	G	C	A	T	C	C	A	T	T	G	C	C	G	A	T	T	C	T	C	A
SAMPANG KUNING::IRGC 18678-2::[IRIS 313-10809]	IRIS 313-10809	IRGC 128158	trop	1	C	G	G	G	C	C	A	A	T	A	G	G	T	G	T	C	G	G	A	C	T	T	C	A	G	G	C	A	T	C	C	A	T	T	G	C	C	G	A	T	T	C	T	C	A
SIDJANGGUK::IRGC 18826-2::[IRIS 313-10815]	IRIS 313-10815	IRGC 135632	trop	1	C	G	G	G	C	C	A	A	T	A	G	G	T	G	T	C	G	G	A	C	T	T	C	A	G	G	C	A	T	C	C	A	T	T	G	C	C	G	A	T	T	C	T	C	A
SIDJERO GUNDIL::IRGC 18829-2::[IRIS 313-10816]	IRIS 313-10816	IRGC 128164	trop	1	C	G	G	G	C	C	A	A	T	A	G	G	T	G	T	C	G	G	A	C	T	T	C	A	G	G	C	A	T	C	C	A	T	T	G	C	C	G	A	T	T	C	T	C	A
SLAMET::IRGC 18900-1::[IRIS 313-10817]	IRIS 313-10817	IRGC 135796	trop	1	C	G	G	G	C	C	A	A	T	A	G	G	T	G	T	C	G	G	A	C	T	T	C	A	G	G	C	A	T	C	C	A	T	T	G	C	C	G	A	T	T	C	T	C	A
TJERE ENER::IRGC 19103-1::[IRIS 313-10819]	IRIS 313-10819	IRGC 127860	ind3	1	C	G	G	G	C	C	A	A	T	A	G	G	T	G	T	C	G	G	A	C	T	T	C	A	G	G	C	A	T	C	C	A	T	T	G	C	C	G	A	T	T	C	T	C	A
UNGGAS::IRGC 19176-2::[IRIS 313-10822]	IRIS 313-10822	IRGC 128199	ind3	3	C	G	G	G	C	C	A	A	C	A	G	G	T	G	T	C	G	G	A	C	T	G	C	A	G	G	C	G	T	C	C	A	T	T	G	C	C	G	A	T	T	C	T	C	A
UTRI DELI::IRGC 19182-1::[IRIS 313-10823]	IRIS 313-10823	IRGC 127880	ind3	3	C	G	G	G	C	C	A	A	C	A	G	G	T	G	T	C	G	G	A	C	T	G	C	A	G	G	C	G	T	C	C	A	T	T	G	C	C	G		T	T	C	T	C	A
BINARITOS::IRGC 19391-1::[IRIS 313-10827]	IRIS 313-10827	IRGC 128242	trop	3	C	G	G	G	C	C	A	A	C	A	G	G	T	G	T	C	G	G	A	C	T	T	C	A	G	G	C	G	T	C	C	A	T	T	G	C	C	G	A	T	T	C	T	C	A
IKOGAN::IRGC 19412-1::[IRIS 313-10828]	IRIS 313-10828	IRGC 128319	trop	3	C	G	G	G	C	C	A	A	C	A	G	G	T	G	T	C	G	G	A	C	T	T	C	A	G	G	C	G	T	C	C	A	T	T	G	C	C	G	A	T	T	C	T	C	A
INAPORAONAN::IRGC 19418-1::[IRIS 313-10830]	IRIS 313-10830	IRGC 127429	trop	3	C	G	G	G	C	C	A	A	C	A	G	G	T	G	T	C	G	G	A	C	T	T	C	A	G	G	C	G	T	C	C	A	T	T	G	C	C	G	A	T	T	C	T	C	A
MALANDI 2::IRGC 19454-2::[IRIS 313-10831]	IRIS 313-10831	IRGC 132355	trop	1	C	G	G	G	C	C	A	A	T	A	G	G	T	G	T	C	G	G	A	C	T	T	C	A	G	G	C	A	T	C	C	A	T	T	G	C	C	G	A	T	T	C	T	C	A
MALASAY::IRGC 19456-1::[IRIS 313-10832]	IRIS 313-10832	IRGC 128377	trop	3	C	G	G	G	C	C	A	A	C	A	G	G	T	G	T	C	G	G	A	C	T	T	C	A	G	G	C	G	T	C	C	A	T	T	G	C	C	G	A	T	T	C	T	C	A
EDAKKADAN 0-69-27::IRGC 19560-1::[IRIS 313-10833]	IRIS 313-10833	IRGC 127355	ind2	4	C	G	G	G	C	C	A	A	C	A	G	G	T	G	T	C	G	G	A	C	T	G	C	A	G	G	C	G	T	C	C	A	T	T	G	G	C	G	A	T	T	C	T	C	A
IARI 11387::IRGC 19573-1::[IRIS 313-10834]	IRIS 313-10834	IRGC 128314	subtrop	1	C	G	G	G	C	C	A	A	C	A	G	G	T	G	T	C	G	G	A	C	T	T	C	A	G	G	C	A	T	C	C	A	T	T	G	C	C	G	A	T	T	C	T	C	A
PERUNEL 0-69-18::IRGC 19581-1::[IRIS 313-10835]	IRIS 313-10835	IRGC 127727	ind2	4	C	G	G	G	C	C	A	A	C	A	G	G	T	G	T	C	G	G	A	C	T	G	C	A	G	G	C	G	T	C	C	A	T	T	G	G	C	G	A	T	T	C	T	C	A
VELLA PERUVAZHA 0-68-12::IRGC 19588-1::[IRIS 313-10836]	IRIS 313-10836	IRGC 127887	ind2	4	C	G	G	G	C	C	A	A	C	A	G	G	T	G	T	C	G	G	A	C	T	G	C	A	G	G	C	G	T	C	C	A	T	T	G	G	C	G	A	T	T	C	T	C	A
BACK KYUNG ZO::IRGC 19698-2::[IRIS 313-10837]	IRIS 313-10837	IRGC 132323	temp	0	C	G	G	G	C	C	A	A	C	A	G	G	T	G	T	C	G	G	A	C	T	T	C	A	G	G	C	A	T	C	C	A	T	T	G	C	C	G	A	T	T	C	T	C	A
TAE GU NA::IRGC 19875-2::[IRIS 313-10839]	IRIS 313-10839	IRGC 132270	temp	0	C	G	G	G	C	C	A	A	C	A	G	G	T	G	T	C	G	G	A	C	T	T	C	A	G	G	C	A	T	C	C	A	T	T	G	C	C	G	A	T	T	C	T	C	A
YE ZO::IRGC 19888-1::[IRIS 313-10840]	IRIS 313-10840	IRGC 128507	temp	0	C	G	G	G	C	C	A	A	C	A	G	G	T	G	T	C	G	G	A	C	T	T	C	A	G	G	C	A	T	C	C	A	T	T	G	C	C	G	A	T	T	C	T	C	A
KETAN NANGKA::IRGC 19961-2::[IRIS 313-10841]	IRIS 313-10841	IRGC 128077	trop	1	C	G	G	G	C	C	A	A	T	A	G	G	T	G	T	C	G	G		C	T	T	C	A	G	G	C	A	T	C	C	A	T	T	G	C	C	G	A	T	T	C	T	C	A
ARC 6015::IRGC 20314-2::[IRIS 313-10847]	IRIS 313-10847	IRGC 127972	indx	3	C	G	G	G	C	C	A	A	C	A	G	G	T	G	T	C	G	G	A	C	T	G	C	A	G	G	C	G	T	C	C	A	T	T	G	C	C	G	A	T	T	C	T	C	A
ARC 6188::IRGC 20370-1::[IRIS 313-10848]	IRIS 313-10848	IRGC 131968	subtrop	2.5	C	G	G	G	C	C	A	A	C	A	G	G	T	G	T	C	G	G	A	C	T	T	C	A	G	G	C	G	T	C	C	A	T	T	G	C	C	G	A	T	T	C	T	C	A
ARC 7296::IRGC 20585-1::[IRIS 313-10851]	IRIS 313-10851	IRGC 132387	aro	0	C	G	G	G	C	C	A	A	C	A	G	G	T	G	T	C	G	G	A	C	T	T	C	A	G	G	C		T	C	C	A	T	T	G	C	C	G	A	T	T	C	T	C	A
ARC 7336::IRGC 20606-1::[IRIS 313-10852]	IRIS 313-10852	IRGC 127169	aus	3	C	G	G	G	C	C	A	A	C	A	G	G	T	G	T	C	G	G	A	C	T	G	C	A	G	G	C	G	T	C	C	A	T	T	G	C	C	G	A	T	T	C	T	C	A
ARC 10028::IRGC 20656-2::[IRIS 313-10853]	IRIS 313-10853	IRGC 132239	japx	0	C	G	G	G	C	C	A	A	C	A	G	G	T	G	T	C	G	G	A	C	T	T	C	A	G	G	C	A	T	C	C	A	T	T	G	C	C	G	A		T	C	T	C	A
ARC 10145::IRGC 20744-1::[IRIS 313-10854]	IRIS 313-10854	IRGC 127127	aus	3	C	G	G	G	C	C	A	A	C	A	G	G	T	G	T	C	G	G	A	C	T	G	C	A	G	G	C	G	T	C	C	A	T	T	G	C	C	G	A	T	T	C	T	C	A
ARC 10939::IRGC 21150-2::[IRIS 313-10859]	IRIS 313-10859	IRGC 127933	indx	3	C	G	G	G	C	C	A	A	C	A	G	G	T	G	T	C	G	G	A	C		G	C	A	G	G	C	G	T	C	C	A	T	T	G	C	C	G	A	T	T	C	T	C	A
ARC 11276::IRGC 21278-1::[IRIS 313-10861]	IRIS 313-10861	IRGC 127134	aus	3	C	G	G	G	C	C	A	A	C	A	G	G	T	G	T	C	G	G	A	C	T	G	C	A	G	G	C	G	T	C	C	A	T	T	G	C	C	G	A	T	T	C	T	C	A
ARC 11281::IRGC 21283-1::[IRIS 313-10862]	IRIS 313-10862	IRGC 127135	japx	0	C	G	G	G	C	C	A	A	C	A	G	G	T	G	T	C	G	G	A	C	T	T	C	A	G	G	C	A	T	C	C	A	T	T	G	C	C	G	A	T	T	C	T	C	A
ARC 11322::IRGC 21315-2::[IRIS 313-10863]	IRIS 313-10863	IRGC 127937	ind2	3	C	G	G	G	C	C	A	A	C	A	G	G	T	G	T	C	G	G	A	C	T	G	C	A	G	G	C	G	T	C	C	A	T	T	G	C	C	G	A	T	T	C	T	C	A
ARC 11338::IRGC 21329-1::[IRIS 313-10864]	IRIS 313-10864	IRGC 127136	admix	3	C	G	G	G	C	C	A	A	C	A	G	G	T	G	T	C	G	G	A	C	T	T	C	A	G	G	C	G	T	C	C	A	T	T	G	C	C	G	A	T	T	C	T	C	A
ARC 11424::IRGC 21380-2::[IRIS 313-10865]	IRIS 313-10865	IRGC 127938	subtrop	1	C	G	G	G	C	C	A	A	C	A	G	G	T	G	T	C	G	G	A	C	T	T	C	A	G	G	C	A	T	C	C	A	T	T	G	C	C	G	A	T	T	C	T	C	A
ARC 11538::IRGC 21463-1::[IRIS 313-10867]	IRIS 313-10867	IRGC 128222	subtrop	3	C	G	G	G	C	C	A	A	C	A	G	G	T	G	T	C	G	G	A	C	T	G	C	A	G	G	C	G	T	C	C	A	T	T	G	C	C	G	A	T	T	C	T	C	A
ARC 11571::IRGC 21487-2::[IRIS 313-10868]	IRIS 313-10868	IRGC 127939	aro	3	C	G	G	G	C	C	A	A	C	A	G	G	T	G	T	C	G	G	A	C	T		C	A	G	G	C	G	T	C	C	A	T	T	G	C	C	G	A	T	T	C	T	C	A
ARC 11751::IRGC 21614-1::[IRIS 313-10869]	IRIS 313-10869	IRGC 127138	aus	3	C	G	G	G	C	C	A	A	C	A	G	G	T	G	T	C	G	G	A	C	T	G	C	A	G	G	C	G	T	C	C	A	T	T	G	C	C	G	A	T	T	C	T	C	A
ARC 11768::IRGC 21630-1::[IRIS 313-10870]	IRIS 313-10870	IRGC 131966	subtrop	0	C	G	G	G	C	C	A	A	C	A	G	G	T	G	T	C	G	G	A	C	T	T	C	A	G	G	C	A	T	C	C	A	T	T	G	C	C	G	A	T	T	C	T	C	A
ARC 11777::IRGC 21639-1::[IRIS 313-10871]	IRIS 313-10871	IRGC 127139	aus	3	C	G	G	G	C	C	A	A	C	A	G	G	T	G	T	C	G	G	A	C	T	G	C	A	G	G	C	G	T	C	C	A	T	T	G	C	C	G	A	T	T	C	T	C	A
ARC 12021::IRGC 21837-1::[IRIS 313-10875]	IRIS 313-10875	IRGC 127141	aus	3	C	G	G	G	C	C	A	A	C	A	G	G	T	G	T	C	G	G	A	C	T	G	C	A	G	G	C	G	T	C	C	A	T	T	G	C	C	G	A	T	T	C	T	C	A
ARC 12067::IRGC 21881-1::[IRIS 313-10876]	IRIS 313-10876	IRGC 127142	aus	3	C	G	G	G	C	C	A	A	C	A	G	G	T	G	T	C	G	G	A	C	T	G	C	A	G	G	C	G	T	C	C	A	T	T	G	C	C	G	A	T	T	C	T	C	A
ARC 12079::IRGC 21888-1::[IRIS 313-10877]	IRIS 313-10877	IRGC 127143	aus	3	C	G	G	G	C	C	A	A	C	A	G	G	T	G	T	C	G	G	A	C	T	G	C	A	G	G	C	G	T	C	C	A	T	T	G	C	C	G	A	T	T	C	T	C	A
ARC 12101::IRGC 21907-1::[IRIS 313-10878]	IRIS 313-10878	IRGC 127144	aus	3	C	G	G	G	C	C	A	A	C	A	G	G	T	G	T	C	G	G	A	C	T	G	C	A	G	G	C	G	T	C	C	A	T	T	G	C	C	G	A	T	T		T	C	A
ARC 12124::IRGC 21929-1::[IRIS 313-10879]	IRIS 313-10879	IRGC 127145	admix	3	C	G	G	G	C	C	A	A	C	A	G	G	T	G	T	C	G	G	A		T	G	C	A	G	G	C	G	T	C	C	A	T	T	G	C	C	G	A	T	T	C	T	C	A
ARC 12413::IRGC 22044-1::[IRIS 313-10881]	IRIS 313-10881	IRGC 128223	admix	3	C	G	G	G	C	C	A	A	C	A	G	G	T	G	T	C	G	G	A	C	T	G	C	A	G	G	C	G	T	C	C	A	T	T	G	C	C	G	A	T	T	C	T	C	A
ARC 12433::IRGC 22064-1::[IRIS 313-10882]	IRIS 313-10882	IRGC 127146	aus	3	C	G	G	G	C	C	A	A	C	A	G	G	T	G	T	C	G	G	A	C	T	G	C	A	G	G	C	G	T	C	C	A	T	T	G	C	C	G	A	T	T	C	T	C	A
ARC 12490::IRGC 22095-1::[IRIS 313-10883]	IRIS 313-10883	IRGC 128224	admix	3	C	G	G	G	C	C	A	A	C	A	G	G	T	G	T	C	G	G	A	C	T	G	C	A	G	G	C	G	T	C	C	A	T	T	G	C	C	G	A	T	T	C	T	C	A
ARC 12559::IRGC 22148-2::[IRIS 313-10885]	IRIS 313-10885	IRGC 127942	indx	3	C	G	G	G	C	C	A	A	C	A	G	G	T	G	T	C	G	G	A	C	T	G	C	A	G	G	C	G	T	C	C	A	T	T	G	C	C	G	A	T	T	C	T	C	A
ARC 12655::IRGC 22226-2::[IRIS 313-10886]	IRIS 313-10886	IRGC 132240	subtrop	1	C	G	G	G	C	C	A	A	C	A	G	G	T	G	T	C	G	G	A	C	T	T	C	A	G	G	C	A	T	C	C	A	T	T	G	C	C	G	A	T	T	C	T	C	A
ARC 12726::IRGC 22288-2::[IRIS 313-10888]	IRIS 313-10888	IRGC 127943	subtrop	3	C	G	G	G	C	C	A	A	C	A	G	G	T	G	T	C	G	G	A	C	T	G	C	A	G	G	C	G	T	C	C	A	T	T	G	C	C	G	A	T	T	C	T	C	A
ARC 12730::IRGC 22291-1::[IRIS 313-10889]	IRIS 313-10889		subtrop	0	C	G	G	G	C	C	A	A	C	A	G	G	T	G	T	C	G	G	A	C	T	T	C	A	G	G	C	A	T	C	C	A	T	T	G	C	C	G	A	T	T	C	T	C	A
ARC 12861::IRGC 22395-1::[IRIS 313-10890]	IRIS 313-10890		subtrop	0	C	G	G	G	C	C	A	A	C	A	G	G	T	G	T	C	G	G	A	C	T	T	C	A	G	G	C	A	T	C	C	A	T	T	G	C	C	G	A	T	T	C	T	C	A
ARC 12920::IRGC 22450-1::[IRIS 313-10892]	IRIS 313-10892	IRGC 127149	aus	3	C	G	G	G	C	C	A	A	C	A	G	G	T	G	T	C	G	G	A	C	T	G	C	A	G	G	C	G	T	C	C	A	T	T	G	C	C	G	A	T	T	C	T	C	A
ARC 13156::IRGC 22514-1::[IRIS 313-10893]	IRIS 313-10893	IRGC 128226	subtrop	0	C	G	G	G	C	C	A	A	C	A	G	G	T	G	T	C	G	G	A	C	T	T	C	A	G	G	C	A	T	C	C	A	T	T	G	C	C	G	A	T	T	C	T	C	A
ARC 13257::IRGC 22608-1::[IRIS 313-10895]	IRIS 313-10895	IRGC 127151	subtrop	0	C	G	G	G	C	C	A	A	C	A	G	G	T	G	T	C	G	G	A	C	T	T	C	A	G	G	C	A	T	C	C	A	T	T	G	C	C	G	A	T	T	C	T	C	A
NEANG MAC::IRGC 23071-1::[IRIS 313-10910]	IRIS 313-10910	IRGC 135777	ind3	3	C	G	G	G	C	C	A	A	C	A	G	G	T	G	T	C	G	G	A	C	T	G	C	A	G	G	C	G	T	C	C	A	T	T	G	C	C	G	A	T	T	C	T	C	A
PHAT PRORMOL::IRGC 23143-1::[IRIS 313-10913]	IRIS 313-10913		ind3	3	C	G	G	G	C	C	A	A	C	A	G	G	T	G	T	C	G	G	A	C	T	G	C	A	G	G	C	G	T	C	C	A	T	T	G	C	C	G	A	T	T	C	T	C	A
SRAU SLAP::IRGC 23267-2::[IRIS 313-10916]	IRIS 313-10916		temp	0	C	G	G	G	C	C	A	A	C	A	G	G	T	G	T	C	G	G	A	C	T	T	C	A	G	G	C	A	T	C	C	A	T	T	G	C	C	G	A	T	T	C	T	C	A
T Q QI HAYUQBABA::IRGC 23318-1::[IRIS 313-10917]	IRIS 313-10917	IRGC 128489	indx	3	C	G	G	G	C	C	A	A	C	A	G	G	T	G	T	C	G	G	A	C	T	G	C	A	G	G	C	G	T	C	C	A	T	T	G	C	C	G	A	T	T	C	T	C	A
PINIDWA QAN QIPUGO PINGKITAN::IRGC 23359-1::[IRIS 313-10919]	IRIS 313-10919	IRGC 127731	trop	1	C	G	G	G	C	C	A	A	T	A	G	G	T	G	T	C	G	G	A	C	T	T	C	A	G	G	C	A	T	C	C	A	T	T	G	C	C	G	A	T	T	C	T	C	A
PINIDWA QAN QIPUGO QELEK::IRGC 23360-1::[IRIS 313-10920]	IRIS 313-10920	IRGC 127732	trop	1	C	G	G	G	C	C	A	A	T	A	G	G	T	G	T	C	G	G	A	C	T	T	C	A	G	G	C	A	T	C	C	A	T	T	G	C	C	G	A	T	T	C	T	C	A
KHAO PHAE HOM::IRGC 23518-2::[IRIS 313-10921]	IRIS 313-10921	IRGC 132427	indx	3	C	G	G	G	C	C	A	A	C	A	G	G	T	G	T	C	G	G	A	C	T	G	C	A	G	G	C	G	T	C	C	A	T	T	G	C	C	G	A	T	T	C	T	C	A
R 258::IRGC 23702-2::[IRIS 313-10922]	IRIS 313-10922	IRGC 132264	subtrop	0	C	G	G	G	C	C	A	A	C	A	G	G	T	G	T	C	G	G	A	C	T	T	C	A	G	G	C	A	T	C	C	A	T	T	G	C	C	G	A	T	T	C	T	C	A
CHABLI CHABOL GLANG::IRGC 23706-1::[IRIS 313-10923]	IRIS 313-10923	IRGC 128256	subtrop	1	C	G	G	G	C	C	A	A	C	A	G	G	T	G	T	C	G	G	A	C	T	T	C	A	G	G	C	A	T	C	C	A	T	T	G	C	C	G	A	T	T	C	T	C	A
KHAO' SIM::IRGC 24094-1::[IRIS 313-10928]	IRIS 313-10928	IRGC 128342	ind3	3	C	G	G	G	C	C	A	A	C	A	G	G	T	G	T	C	G	G	A	C	T	G	C	A	G	G	C	G	T	C	C	A	T	T	G	C	C	G	A	T	T	C	T	C	A
PAKWALAN::IRGC 24156-1::[IRIS 313-10931]	IRIS 313-10931	IRGC 132025	trop	3	C	G	G	G	C	C	A	A	C	A	G	G	T	G	T	C	G	G	A	C	T	T	C	A	G	G	C	G	T	C	C	A	T	T	G	C	C	G	A	T	T	C	T	C	A
ARC 7281::IRGC 24252-2::[IRIS 313-10933]	IRIS 313-10933	IRGC 132245	aro	3	C	G	G	G	C	C	A	A	C	A	G	G	T	G	T	C	G	G	A	C	T	T	C	A	G	G	C	G	T	C	C	A	T	T	G	C	C	G	A	T	T	C	T	C	A
PAH PIANG::IRGC 24452-2::[IRIS 313-10934]	IRIS 313-10934	IRGC 128125	ind3	3	C	G	G	G	C	C	A	A	C	A	G	G	T	G	T	C	G	G	A	C	T	G	C	A	G	G	C	G	T	C	C	A	T	T	G	C	C	G	A	T	T	C	T	C	A
KETAN GUNDIL::IRGC 24568-1::[IRIS 313-10936]	IRIS 313-10936	IRGC 127504	trop	1	C	G	G	G	C	C	A	A	T	A	G	G	T	G	T	C	G	G	A	C	T	T	C	A	G	G	C	A	T	C	C	A	T	T	G	C	C	G	A	T	T	C	T	C	A
PULUT WAJIT::IRGC 24624-1::[IRIS 313-10937]	IRIS 313-10937	IRGC 135788	ind3	3	C	G	G	G	C	C	A	A	C	A	G	G	T	G	T	C	G	G	A	C	T	G	C	A	G	G	C	G	T	C	C	A	T	T	G	C	C	G	A	T	T	C	T	C	A
SINTHA::IRGC 24687-1::[IRIS 313-10941]	IRIS 313-10941	IRGC 127809	indx	3	C	G	G	G	C	C	A	A	C	A	G	G	T	G	T	C	G	G	A	C	T	G	C	A	G	G	C	G	T	C	C	A	T	T	G	C	C	G	A	T	T	C	T	C	A
BANDANG BUNGKUAKLAN::IRGC 24697-2::[IRIS 313-10942]	IRIS 313-10942	IRGC 127987	ind3	4	C	G	G	G	C	C	A	A	C	A	G	G	T	G	T	C	G	G	A	C	T	G	C	A	G	G	C	G	T	C	C	A	T	T	G	G	C	G	A	T	T	C	T	C	A
PADI BENOT::IRGC 24757-2::[IRIS 313-10943]	IRIS 313-10943	IRGC 135631	ind3	3.5	C	G	G	G	C	C	A	A	C	A	G	G	T	G	T	C	G	G	A	C	T	G	C	A	G	G	C	G	T	C/T	C	A	T	T	G	C	C	G	A	T	T	C	T	C	A
SIPULUT SUBANG::IRGC 24824-2::[IRIS 313-10944]	IRIS 313-10944	IRGC 132269	ind3	3	C	G	G	G	C	C	A	A	C	A	G	G	T	G	T	C	G	G	A	C	T	G	C	A	G	G	C	G	T	C	C	A	T	T	G	C	C	G	A	T	T	C	T	C	A
BULAK::IRGC 24884-1::[IRIS 313-10945]	IRIS 313-10945	IRGC 128247	trop	3	C	G	G	G	C	C	A	A	C	A	G	G	T	G	T	C	G	G	A	C	T	T	C	A	G	G	C	G	T	C	C	A	T	T	G	C	C	G	A	T	T	C	T	C	A
TEKALAK::IRGC 25154-1::[IRIS 313-10949]	IRIS 313-10949	IRGC 127851	trop	1	C	G	G	G	C	C	A	A	T	A	G	G	T	G	T	C	G	G	A	C	T	T	C	A	G	G	C	A	T	C	C	A	T	T	G	C	C	G	A	T	T	C	T	C	A
ASE PULU BOLONG::IRGC 25171-1::[IRIS 313-10950]	IRIS 313-10950	IRGC 127174	trop	1	C	G	G	G	C	C	A	A	T	A	G	G	T	G	T	C	G	G	A	C	T	T	C	A	G	G	C	A	T	C	C	A	T	T	G	C	C	G	A	T	T	C	T	C	A
KILANG MEDU::IRGC 25442-1::[IRIS 313-10952]	IRIS 313-10952	IRGC 132003	trop	0	C	G	G	G	C	C	A	A	C	A	G	G	T	G	T	C	G	G	A	C	T	T	C	A	G	G	C	A	T	C	C	A	T	T	G	C	C	G	A	T	T	C	T	C	A
PADI ABUNG KUNING::IRGC 25469-1::[IRIS 313-10953]	IRIS 313-10953	IRGC 128417	trop	3	C	G	G	G	C	C	A	A	C	A	G	G	T	G	T	C	G	G	A	C	T	T	C	A	G	G	C	G	T	C	C	A	T	T	G	C	C	G	A	T	T	C	T	C	A
PADI PUYUH::IRGC 25532-1::[IRIS 313-10955]	IRIS 313-10955	IRGC 127702	ind3	3	C	G	G	G	C	C	A	A	C	A	G	G	T	G	T	C	G	G	A	C	T	G	C	A	G	G	C	G	T	C	C	A	T	T	G	C	C	G	A	T	T	C	T	C	A
PUTUS TOLO::IRGC 25636-2::[IRIS 313-10956]	IRIS 313-10956	IRGC 128144	trop	1	C	G	G	G	C	C	A	A	T	A	G	G	T	G	T	C	G	G	A	C	T	T	C	A	G	G	C	A	T	C	C	A	T	T	G	C	C	G	A	T	T	C	T	C	A
RANGKAI KEPEL::IRGC 25640-1::[IRIS 313-10957]	IRIS 313-10957	IRGC 128446	trop	1	C	G	G	G	C	C	A	A	T	A	G	G	T	G	T	C	G	G	A	C	T	T	C	A	G	G	C	A	T	C	C	A	T	T	G	C	C	G	A	T	T	C	T	C	A
RENIK BELITI::IRGC 25648-1::[IRIS 313-10958]	IRIS 313-10958	IRGC 128450	trop	3	C	G	G	G	C	C	A	A	C	A	G	G	T	G	T	C	G	G	A	C	T	G	C	A	G	G	C	G	T	C	C	A	T	T	G	C	C	G	A	T	T	C	T	C	A
SITABO TABO::IRGC 25798-1::[IRIS 313-10959]	IRIS 313-10959	IRGC 128473	trop	3	C	G	G	G	C	C	A	A	C	A	G	G	T	G	T	C	G	G	A	C	T	T	C	A	G	G	C	G	T	C	C	A	T	T	G	C	C	G	A	T	T	C	T	C	A
KATAKCHIKON::IRGC 25880-1::[IRIS 313-10963]	IRIS 313-10963	IRGC 127497	aus	3	C	G	G	G	C	C	A	A	C	A	G	G	T	G	T	C	G	G	A	C	T	G	C	A	G	G	C	G	T	C	C	A	T	T	G	C	C	G	A	T	T	C	T	C	A
TILOKCHAN (SONABETHI)::IRGC 25927-1::[IRIS 313-10965]	IRIS 313-10965	IRGC 127859	aus	3	C	G	G	G	C	C	A	A	C	A	G	G	T	G	T	C	G	G	A	C	T	G	C	A	G	G	C	G	T	C	C	A	T	T	G	C	C	G	A	T	T	C	T	C	A
IAS 22-8 PALMAR::IRGC 26058-1::[IRIS 313-10967]	IRIS 313-10967	IRGC 128315	temp	0	C	G	G	G	C	C	A	A	C	A	G	G	T	G	T	C	G	G	A	C	T	T	C	A	G	G	C	A	T	C	C	A	T	T	G	C	C	G	A	T	T	C	T	C	A
INDIA DULAR (NO ORDEM 7)::IRGC 26070-1::[IRIS 313-10969]	IRIS 313-10969	IRGC 127430	aus	3	C	G	G	G	C	C	A	A	C	A	G	G	T	G	T	C	G	G	A	C	T	G	C	A	G	G	C	G	T	C	C	A	T	T	G	C	C	G	A	T	T	C	T	C	A
BADAL::IRGC 26290-2::[IRIS 313-10971]	IRIS 313-10971	IRGC 127981	ind2	3.5	C	G	G	G	C	C	A	A	C	A	G	G	T	G	T	C	G	G	A	C	T	G	C	A	G	G	C	G	T	C	C	A	T	T	G	C/G	C	G	A	T	T	C	T	C	A
DUDA MONOR::IRGC 26335-2::[IRIS 313-10972]	IRIS 313-10972	IRGC 128033	ind2	3	C	G	G	G	C	C	A	A	C	A	G	G	T	G	T	C	G	G	A	C	T	G	C	A	G	G	C	G	T	C	C	A	T	T	G	C	C	G	A	T	T	C	T	C	A
KALA DIGHA::IRGC 26367-2::[IRIS 313-10973]	IRIS 313-10973	IRGC 128064	ind2	3	C	G	G	G	C	C	A	A	C	A	G	G	T	G	T	C	G	G	A	C	T	G	C	A	G	G	C	G	T	C	C	A	T	T	G	C	C	G	A	T	T	C	T	C	A
KAMRANGA::IRGC 26373-2::[IRIS 313-10974]	IRIS 313-10974	IRGC 128070	ind2	3	C	G	G	G	C	C	A	A	C	A	G	G	T	G	T	C	G	G	A	C	T	G	C	A	G	G	C	G	T	C	C	A	T	T	G	C	C	G	A	T	T	C	T	C	A
KOLA MUCHI::IRGC 26384-2::[IRIS 313-10975]	IRIS 313-10975		ind2	3	C	G	G	G	C	C	A	A	C	A	G	G	T	G	T	C	G	G	A	C	T	G	C	A	G	G	C	G	T	C	C	A	T	T	G	C	C	G	A	T	T	C	T	C	A
LAKHSMI DIGHA::IRGC 26390-2::[IRIS 313-10976]	IRIS 313-10976	IRGC 132348	aus	3	C	G	G	G	C	C	A	A	C	A	G	G	T	G	T	C	G	G	A	C	T	G	C	A	G	G	C	G	T	C	C	A	T	T	G	C	C	G	A	T	T	C	T	C	A
MATI CHAL::IRGC 26399-2::[IRIS 313-10977]	IRIS 313-10977	IRGC 128107	ind2	3	C	G	G	G	C	C	A	A	C	A	G	G	T	G	T	C	G	G	A	C	T	G	C	A	G	G	C	G	T	C	C	A	T	T	G	C	C	G	A	T	T	C	T	C	A
PANI TORONG::IRGC 26411-1::[IRIS 313-10978]	IRIS 313-10978	IRGC 127713	indx	4	C	G	G	G	C	C	A	A	C	A	G	G	T	G	T	C	G	G	A		T	G	C	A	G	G	C	G	T	C	C	A	T	T	G	G	C	G	A	T	T	C	T	C	A
LUDI GOCHYA::IRGC 26504-2::[IRIS 313-10982]	IRIS 313-10982	IRGC 128100	ind2	3	C	G	G	G	C	C	A	A	C	A	G	G	T	G	T	C	G	G	A	C	T	G	C	A	G	G	C	G		C	C	A	T	T	G	C	C	G	A	T	T	C	T	C	A
DUDHSAR::IRGC 26609-2::[IRIS 313-10984]	IRIS 313-10984	IRGC 128034	ind2	3	C	G	G	G	C	C	A	A	C	A	G	G	T	G	T	C	G	G	A	C	T	G	C	A	G	G	C	G	T	C	C	A	T	T	G	C	C	G	A	T	T	C	T	C	A
HALDI JAON::IRGC 26638-2::[IRIS 313-10986]	IRIS 313-10986	IRGC 128048	ind2	3	C	G	G	G	C	C	A	A	C	A	G	G	T	G	T	C	G	G	A	C	T	G	C	A	G	G	C	G	T	C	C	A	T	T	G	C	C	G	A	T	T	C	T	C	A
GUTTI AKKULLU::IRGC 26850-2::[IRIS 313-10989]	IRIS 313-10989	IRGC 128046	ind2	3	C	G	G	G	C	C	A	A	C	A	G	G	T	G	T	C	G	G	A	C	T	G	C	A	G	G	C	G	T	C	C	A	T	T	G	C	C	G	A	T	T	C	T	C	A
BALIBUD::IRGC 26871-1::[IRIS 313-10990]	IRIS 313-10990	IRGC 127206	indx	3	C	G	G	G	C	C	A	A	C	A	G	G	T	G	T	C	G	G	A	C	T	G	C	A	G	G	C	G	T	C	C	A	T	T	G	C	C	G	A	T	T	C	T	C	A
PILIT TAPUL::IRGC 26887-1::[IRIS 313-10992]	IRIS 313-10992	IRGC 127730	trop	3	C	G	G	G	C	C	A	A	C	A	G	G	T	G	T	C	G	G	A	C	T	T	C	A	G	G	C	G	T	C	C	A	T	T	G	C	C	G	A	T	T	C	T	C	A
LANNAB::IRGC 26936-2::[IRIS 313-10993]	IRIS 313-10993	IRGC 132349	trop	3	C	G	G	G	C	C	A	A	C	A	G	G	T	G	T	C	G	G	A	C	T	T	C	A	G	G	C	G	T	C	C	A	T	T	G	C	C	G	A	T	T	C	T	C	A
PANGETAN::IRGC 26942-1::[IRIS 313-10994]	IRIS 313-10994	IRGC 135783	trop	1	C	G	G	G	C	C	A	A	T	A	G	G	T	G	T	C	G	G	A	C	T	T	C	A	G	G	C	A	T	C	C	A	T	T	G	C	C	G	A	T	T	C	T	C	A
KETAN RASO::IRGC 27154-1::[IRIS 313-10998]	IRIS 313-10998		indx	1	C	G	G	G	C	C	A	A	T	A	G	G	T	G	T	C	G	G	A	C	T	T	C	A	G	G	C	A	T	C	C	A	T	T	G	C	C	G	A	T	T	C	T	C	A
LANDEO::IRGC 27164-1::[IRIS 313-10999]	IRIS 313-10999	IRGC 127550	trop	1	C	G	G	G	C	C	A	A	T	A	G	G	T	G	T	C	G	G	A	C	T	T	C	A	G	G	C	A	T	C	C	A	T	T	G	C	C	G	A	T	T	C	T	C	A
PAE SANGGULA::IRGC 27297-1::[IRIS 313-11004]	IRIS 313-11004	IRGC 128423	trop	1	C	G	G	G	C	C	A	A	T	A	G	G	T	G	T	C	G	G	A	C	T	T	C	A	G	G	C	A	T	C	C	A	T	T	G	C	C	G	A	T	T	C	T	C	A
PULU LOTONG::IRGC 27380-2::[IRIS 313-11005]	IRIS 313-11005	IRGC 128140	trop	1	C	G	G	G	C	C	A	A	T	A	G	G	T	G	T	C	G	G	A	C	T		C	A	G	G	C	A	T	C	C	A	T	T	G	C	C	G	A	T	T	C	T	C	A
PULUT BONGO::IRGC 27397-2::[IRIS 313-11007]	IRIS 313-11007	IRGC 128141	trop	1	C	G	G	G	C	C	A	A	T	A	G	G	T	G	T	C	G	G	A	C	T	T	C	A	G	G	C	A	T	C	C	A	T	T	G	C	C	G	A	T	T	C	T	C	A
PULUT CENRANA::IRGC 27400-2::[IRIS 313-11008]	IRIS 313-11008	IRGC 128142	trop	1	C	G	G	G	C	C	A	A	T	A	G	G	T	G	T	C	G	G	A	C	T	T	C	A	G	G	C	A	T	C	C	A	T	T	G	C	C	G	A	T	T	C	T	C	A
PULUT HALAPA::IRGC 27403-1::[IRIS 313-11009]	IRIS 313-11009	IRGC 127749	trop	1	C	G	G	G	C	C	A	A	T	A	G	G	T	G	T	C	G	G	A	C	T	T	C	A	G	G	C	A	T	C	C	A	T	T	G	C	C	G	A	T	T	C	T	C	A
TELURIKAN::IRGC 27478-1::[IRIS 313-11012]	IRIS 313-11012	IRGC 132046	admix	1	C	G	G	G	C	C	A	A	T	A	G	G	T	G	T	C	G	G	A	C	T	T	C	A	G	G	C	A	T	C	C	A	T	T	G	C	C	G	A	T	T	C	T	C	A
BOTESWAR 2::IRGC 27536-1::[IRIS 313-11013]	IRIS 313-11013	IRGC 127236	aus	3	C	G	G	G	C	C	A	A	C	A	G	G	T	G	T	C	G	G	A	C	T	G	C	A	G	G		G	T	C	C	A	T	T	G	C	C	G	A	T	T	C	T	C	A
CHAKILA::IRGC 27540-1::[IRIS 313-11014]	IRIS 313-11014	IRGC 127253	aus	3	C	G	G	G	C	C	A	A	C	A	G	G	T	G	T	C	G	G	A	C	T	G	C	A	G	G	C	G	T	C	C	A	T	T	G	C	C	G	A	T	T	C	T	C	A
HANPA::IRGC 27547-2::[IRIS 313-11015]	IRIS 313-11015	IRGC 128050	aus	3	C	G	G	G	C	C	A	A	C	A	G	G	T	G	T	C	G	G	A	C	T	G	C	A	G	G	C	G	T	C	C	A	T	T	G	C	C	G	A	T	T	C	T	C	A
LOROI::IRGC 27567-1::[IRIS 313-11017]	IRIS 313-11017	IRGC 128369	aus	3	C	G	G	G	C	C	A	A	C	A	G	G	T	G	T	C	G	G	A	C	T	G	C	A	G	G	C	G	T	C	C	A	T	T	G	C	C	G	A	T	T	C	T	C	A
MADISA::IRGC 27568-1::[IRIS 313-11018]	IRIS 313-11018	IRGC 127586	aus	3	C	G	G	G	C	C	A	A	C	A	G	G	T	G	T	C	G	G	A	C	T	G	C	A	G	G	C	G	T	C	C	A	T	T	G	C	C	G	A	T	T	C	T	C	A
BAMLA SUFFAID 320::IRGC 27776-1::[IRIS 313-11020]	IRIS 313-11020	IRGC 128236	aus	3	C	G	G	G	C	C	A	A	C	A	G	G	T	G	T	C	G	G	A	C	T	G	C	A	G	G	C	G	T	C	C	A	T	T	G	C	C	G	A	T	T	C	T	C	A
BARA PASHAWARI 390::IRGC 27779-1::[IRIS 313-11021]	IRIS 313-11021	IRGC 127210	aro	3	C	G	G	G	C	C	A	A	C	A	G	G	T	G	T	C	G	G	A	C	T	G	C	A	G	G	C	G	T	C	C	A	T	T	G	C	C	G	A	T	T	C	T	C	A
BASMATI SUFAID 100::IRGC 27791-1::[IRIS 313-11022]	IRIS 313-11022	IRGC 135737	aro	0	C	G	G	G	C	C	A	A	C	A	G	G	T	G	T	C	G	G	A	C	T	T	C	A	G	G	C	A	T	C	C	A	T	T	G	C	C	G	A	T	T	C	T	C	A
BASMATI SURKH 161::IRGC 27797-1::[IRIS 313-11023]	IRIS 313-11023	IRGC 127214	aro	3	C	G	G	G	C	C	A	A	C	A	G	G	T	G	T	C	G	G	A	C	T	G	C	A	G	G	C	G	T	C	C	A	T	T	G	C	C	G	A	T	T	C	T	C	A
BEGMI 135::IRGC 27845-1::[IRIS 313-11024]	IRIS 313-11024	IRGC 127217	aus	3	C	G	G	G	C	C	A	A	C	A	G	G	T	G	T	C	G	G	A	C	T	G	C	A	G	G	C	G	T	C	C	A	T	T	G	C	C	G	A	T	T	C	T	C	A
HANSRAJ::IRGC 27936-2::[IRIS 313-11026]	IRIS 313-11026	IRGC 132336	aro	3	C	G	G	G	C	C	A	A	C	A	G	G	T	G	T	C	G	G	A	C	T	T	C	A	G	G	C	G	T	C	C	A	T	T	G	C	C	G	A	T	T	C	T	C	A
JHONA 101::IRGC 27976-1::[IRIS 313-11027]	IRIS 313-11027	IRGC 127454	aus	3	C	G	G	G	C	C	A	A	C	A	G	G	T	G	T	C	G	G	A	C	T	G	C	A	G	G	C	G	T	C	C	A	T	T	G	C	C	G	A	T	T	C	T	C	A
MOTIA::IRGC 28036-1::[IRIS 313-11028]	IRIS 313-11028	IRGC 128393	aus	3	C	G	G	G	C	C	A	A	C	A	G	G	T	G	T	C	G	G	A	C	T	G	C	A	G	G	C	G	T	C	C	A	T	T	G	C	C	G	A	T	T	C	T	C	A
MUSHKAN 340 A::IRGC 28073-1::[IRIS 313-11029]	IRIS 313-11029	IRGC 127641	aus	3	C	G	G	G	C	C	A	A	C	A	G	G	T	G	T	C	G	G	A	C	T	G	C	A	G	G	C	G	T	C	C	A	T	T	G	C	C	G	A	T	T	C	T	C	A
MUTANT 12-42::IRGC 28076-1::[IRIS 313-11030]	IRIS 313-11030		aro	3	C	G	G	G	C	C	A	A	C	A	G	G	T	G	T	C	G	G	A	C	T	T	C	A	G	G	C	G	T	C	C	A	T	T	G	C	C	G	A	T	T	C	T	C	A
NAWAN SATHRA BAGAR 344::IRGC 28079-1::[IRIS 313-11031]	IRIS 313-11031	IRGC 128403	aus	3	C	G	G	G	C	C	A	A	C	A	G	G	T	G	T	C	G	G	A	C	T	G	C	A	G	G	C	G	T	C	C	A	T	T	G	C	C	G	A	T	T	C	T	C	A
PALAM PURI BAS 137::IRGC 28084-1::[IRIS 313-11032]	IRIS 313-11032	IRGC 127710	aro	0	C	G	G	G	C	C	A	A	C	A	G	G	T	G	T	C	G	G	A	C	T	T	C	A	G	G	C	A	T	C	C	A	T	T	G	C	C	G	A	T	T	C	T	C	A
SANTHI 206::IRGC 28215-1::[IRIS 313-11034]	IRIS 313-11034	IRGC 127786	aus	3	C	G	G	G	C	C	A	A	C	A	G	G	T	G	T	C	G	G	A	C	T	G	C	A	G	G	C	G	T	C	C	A	T	T	G	C	C	G	A	T	T	C	T	C	A
34::IRGC 28371-2::[IRIS 313-11036]	IRIS 313-11036	IRGC 127919	aus	3	C	G	G	G	C	C	A	A	C	A	G	G	T	G	T	C	G	G	A	C	T	G	C	A	G	G	C	G	T	C	C	A	T	T	G	C	C	G	A	T	T	C	T	C	A
421::IRGC 28458-1::[IRIS 313-11037]	IRIS 313-11037	IRGC 128211	aus	3	C	G	G	G	C	C	A	A	C	A	G	G	T	G	T	C	G	G	A	C	T	G	C	A	G	G	C	G	T	C	C	A	T	T	G	C	C	G	A	T	T	C	T	C	A
POONGAR::IRGC 28611-1::[IRIS 313-11041]	IRIS 313-11041	IRGC 127738	ind2	4	C	G	G	G	C	C	A	A	C	A	G	G	T	G	T	C	G	G	A	C	T	G	C	A	G	G	C	G	T	C	C	A	T	T	G	G	C	G	A	T	T	C	T	C	A
ENGKABANG::IRGC 28694-2::[IRIS 313-11045]	IRIS 313-11045	IRGC 128039	trop	1	C	G	G	G	C	C	A	A	T	A	G	G	T	G	T	C	G	G	A	C	T		C	A	G	G	C	A	T	C	C	A	T	T	G	C	C	G	A	T	T	C	T	C	A
AUS 84::IRGC 28947-2::[IRIS 313-11047]	IRIS 313-11047	IRGC 127977	aus	3	C	G	G	G	C	C	A	A	C	A	G	G	T	G	T	C	G	G	A	C	T	G	C	A	G	G	C	G	T	C	C	A	T	T	G	C	C	G	A	T	T	C	T	C	A
AUS 171::IRGC 29004-1::[IRIS 313-11048]	IRIS 313-11048	IRGC 127178	aus	3	C	G	G	G	C	C	A	A	C	A	G	G	T	G	T	C	G	G	A	C	T	G	C	A	G	G	C	G	T	C	C	A	T	T	G	C	C	G	A	T	T	C	T	C	A
AUS 219::IRGC 29031-1::[IRIS 313-11049]	IRIS 313-11049	IRGC 127179	aus	3	C	G	G	G	C	C	A	A	C	A	G	G	T	G	T	C	G	G	A	C	T	G	C	A	G	G	C	G	T	C	C	A	T	T	G		C	G	A	T	T	C	T	C	A
AUS 242::IRGC 29040-1::[IRIS 313-11051]	IRIS 313-11051	IRGC 127181	aus	3	C	G	G	G	C	C	A	A	C	A	G	G	T	G	T	C	G	G	A	C	T	G	C	A	G	G	C	G	T	C	C	A	T	T	G	C	C	G	A	T	T	C	T	C	A
AUS 278::IRGC 29068-1::[IRIS 313-11052]	IRIS 313-11052	IRGC 127182	aus	3	C	G	G	G	C	C	A	A	C	A	G	G	T	G	T	C	G	G	A	C	T	G	C	A	G	G	C	G	T	C	C	A	T	T	G	C	C	G	A	T	T	C	T	C	A
AUS 295::IRGC 29083-1::[IRIS 313-11054]	IRIS 313-11054	IRGC 127184	aus	3	C	G	G	G	C	C	A	A	C	A	G	G	T	G	T	C	G	G	A	C	T	G	C	A	G	G	C	G	T	C	C	A	T	T	G	C	C	G	A	T	T	C	T	C	A
AUS 299::IRGC 29087-1::[IRIS 313-11055]	IRIS 313-11055	IRGC 127185	aus	3	C	G	G	G	C	C	A	A	C	A	G	G	T	G	T	C	G	G	A	C	T	G	C	A	G	G	C	G	T	C	C	A	T	T	G	C	C	G	A	T	T	C	T	C	A
AUS 301::IRGC 29089-1::[IRIS 313-11056]	IRIS 313-11056	IRGC 127186	aus	3	C	G	G	G	C	C	A	A	C	A	G	G	T	G	T	C	G	G	A	C	T	G	C	A	G	G	C	G	T	C	C	A	T	T	G	C	C	G	A	T	T	C	T	C	A
AUS 308::IRGC 29096-1::[IRIS 313-11057]	IRIS 313-11057	IRGC 127187	aus	3	C	G	G	G	C	C	A	A	C	A	G	G	T	G	T	C	G	G	A	C	T	G	C	A	G	G	C	G	T	C	C	A	T	T	G	C	C	G	A	T	T	C	T	C	A
AUS 359::IRGC 29146-2::[IRIS 313-11060]	IRIS 313-11060	IRGC 132322	aus	3	C	G	G	G	C	C	A	A	C	A	G	G	T	G	T	C	G	G	A	C	T	G	C	A	G	G	C	G	T	C	C	A	T	T	G	C	C	G	A	T	T	C	T	C	A
AUS 449::IRGC 29230-1::[IRIS 313-11061]	IRIS 313-11061	IRGC 127190	aus	3	C	G	G	G	C	C	A	A	C	A	G	G	T	G	T	C	G	G	A	C	T	G	C	A	G	G	C	G	T	C	C	A	T	T	G	C	C	G	A	T	T	C	T	C	A
BEGUNBICHI 33::IRGC 29260-1::[IRIS 313-11062]	IRIS 313-11062	IRGC 127218	aro	3	C	G	G	G	C	C	A	A	C	A	G	G	T	G	T	C	G	G	A	C	T	T	C	A	G	G	C	G	T	C	C	A	T	T	G	C	C	G	A	T	T	C	T	C	A
BORO 70-2::IRGC 29283-1::[IRIS 313-11063]	IRIS 313-11063	IRGC 135741	aus	3	C	G	G	G	C	C	A	A	C	A	G	G	T	G	T	C	G	G	A	C	T	G	C	A	G	G	C	G	T	C	C	A	T	T	G	C	C	G	A	T	T	C	T	C	A
BORO 275::IRGC 29294-2::[IRIS 313-11064]	IRIS 313-11064	IRGC 132306	aus	3	C	G	G	G	C	C	A	A	C	A	G	G	T	G	T	C	G	G	A	C	T	G	C	A	G	G	C	G	T	C	C	A	T	T	G	C	C	G	A	T	T	C	T	C	A
BORO 394::IRGC 29297-2::[IRIS 313-11065]	IRIS 313-11065	IRGC 132326	aus	3	C	G	G	G	C	C	A	A	C	A	G	G	T	G	T	C	G	G	A	C	T	G	C	A	G	G	C	G	T	C	C	A	T	T	G	C	C	G	A	T	T	C	T	C	A
GASMAL 339::IRGC 29333-1::[IRIS 313-11066]	IRIS 313-11066	IRGC 127381	admix	3	C	G	G	G	C	C	A	A	C	A	G	G	T	G	T	C	G	G	A	C	T	T	C	A	G	G	C	G	T	C	C	A	T	T	G	C	C	G	A	T	T	C	T	C	A
KALIBORO 600::IRGC 29367-1::[IRIS 313-11067]	IRIS 313-11067	IRGC 127481	aus	3	C	G	G	G	C	C	A	A	C	A	G	G	T	G	T	C	G	G	A	C	T	G	C	A	G	G	C	G	T	C	C	A	T	T	G	C	C	G	A	T	T	C	T	C	A
PANKAIT 31::IRGC 29377-1::[IRIS 313-11068]	IRIS 313-11068	IRGC 128426	aro	3	C	G	G	G	C	C	A	A	C	A	G	G	T	G	T	C	G	G	A	C	T	G	C	A	G	G	C	G	T	C	C	A	T	T	G	C	C	G	A	T	T	C	T	C	A
TUPA 15-3::IRGC 29416-2::[IRIS 313-11069]	IRIS 313-11069	IRGC 128197	aro	3	C	G	G	G	C	C	A	A	C	A	G	G	T	G	T	C	G	G	A	C	T	T	C	A	G	G	C	G	T	C	C	A	T	T	G	C	C	G	A	T	T	C	T	C	A
TUPA::IRGC 29432-1::[IRIS 313-11070]	IRIS 313-11070	IRGC 127239	admix	3	C	G	G	G	C	C	A	A	C	A	G	G	T	G	T	C	G	G	A	C	T	T	C	A	G	G	C	G	T	C	C	A	T	T	G	C	C	G	A	T	T	C	T	C	A
KHAO NAM YEN::IRGC 29546-2::[IRIS 313-11075]	IRIS 313-11075	IRGC 128084	japx	3	C	G	G	G	C	C	A	A	C	A	G	G	T	G	T	C	G	G	A	C	T	T	C	A	G	G	C	G	T	C	C	A	T	T	G	C	C	G	A	T	T	C	T	C	A
LAI NOK KHA::IRGC 29604-2::[IRIS 313-11076]	IRIS 313-11076	IRGC 128094	ind3	3	C	G	G	G	C	C	A	A	C	A	G	G	T	G	T	C	G	G	A	C	T	G	C	A	G	G	C	G	T	C	C	A	T	T	G	C	C	G	A	T	T	C	T	C	A
LAI HANG HMA::IRGC 29608-2::[IRIS 313-11077]	IRIS 313-11077	IRGC 128522	subtrop	1	C	G	G	G	C	C	A	A	C	A	G	G	T	G	T	C	G	G	A	C	T	T	C	A	G	G	C	A	T	C	C	A	T	T	G	C	C	G	A	T	T	C	T	C	A
PHAE MEUN LAN::IRGC 29660-1::[IRIS 313-11080]	IRIS 313-11080	IRGC 128430	ind3	3	C	G	G	G	C	C	A	A	C	A	G	G	T	G	T	C	G	G	A	C	T	G	C	A	G	G	C	G	T	C	C	A	T	T	G	C	C	G	A	T	T	C	T	C	A
THAO LOUANG::IRGC 29688-2::[IRIS 313-11081]	IRIS 313-11081	IRGC 128184	ind3	3	C	G	G	G	C	C	A	A	C	A	G	G	T	G	T	C	G	G	A	C	T	G	C	A	G	G	C	G	T	C	C	A	T	T	G	C	C	G	A	T	T	C	T	C	A
EA DAM HANG DOK::IRGC 29698-2::[IRIS 313-11082]	IRIS 313-11082	IRGC 128036	ind3	3	C	G	G	G	C	C	A	A	C	A	G	G	T	G	T	C	G	G	A	C	T	G	C	A	G	G	C	G	T	C	C	A	T	T	G	C	C	G	A	T	T	C	T	C	A
EA TIA::IRGC 29713-2::[IRIS 313-11083]	IRIS 313-11083	IRGC 132248	ind3	3	C	G	G	G	C	C	A	A	C	A	G	G	T	G	T	C	G	G	A	C	T	G	C	A	G	G	C	G	T	C	C	A	T	T	G	C	C	G	A	T	T	C	T	C	A
KHAO HAE::IRGC 29773-3::[IRIS 313-11085]	IRIS 313-11085	IRGC 132273	indx	3	C	G	G	G	C	C	A	A	C	A	G	G	T	G	T	C	G	G	A	C	T	G	C	A	G	G	C	G	T	C	C	A	T	T	G	C	C	G	A	T	T	C	T	C	A
KHAO NON::IRGC 30051-1::[IRIS 313-11091]	IRIS 313-11091	IRGC 127515	indx	3	C	G	G	G	C	C	A	A	C	A	G	G	T	G	T	C	G	G	A	C	T	G	C	A	G	G	C	G	T	C	C	A	T	T	G	C	C	G	A	T	T	C	T	C	A
KHAO TAM::IRGC 30085-2::[IRIS 313-11093]	IRIS 313-11093	IRGC 128086	subtrop	0	C	G	G	G	C	C	A	A	C	A	G	G	T	G	T	C	G	G	A	C	T	T	C	A	G	G	C	A	T	C	C	A	T	T	G	C	C	G	A	T	T	C	T	C	A
KOLUBA::IRGC 30463-1::[IRIS 313-11098]	IRIS 313-11098	IRGC 134993	ind3	3.5	C	G	G	G	C	C	A	A	C	A	G	G	T	G	T	C	G	G	A	C	T	G	C	A	G	G	C	G	T	C	C	A	T	T	G	C/G	C	G	A	T	T	C	T	C	A
D 1-39::IRGC 30868-1::[IRIS 313-11102]	IRIS 313-11102		trop	3	C	G	G	G	C	C	A	A	C	A	G	G	T	G	T	C	G	G	A	C	T	T	C	A	G	G	C	G	T	C	C	A	T	T	G	C	C	G	A	T	T	C	T	C	A
D 1-147::IRGC 30894-2::[IRIS 313-11103]	IRIS 313-11103	IRGC 132329	trop	3	C	G	G	G	C	C	A	A	C	A	G	G	T	G	T	C	G	G	A	C	T	T	C	A	G	G	C	G	T	C	C	A	T	T	G	C	C	G	A	T	T	C	T	C	A
D 3-102::IRGC 30972-1::[IRIS 313-11104]	IRIS 313-11104	IRGC 131978	trop	3	C	G	G	G	C	C	A	A	C	A	G	G	T	G	T	C	G	G	A	C	T	T	C	A	G	G	C	G	T	C	C	A	T	T	G	C	C	G	A	T	T	C	T	C	A
D 3-130::IRGC 30986-2::[IRIS 313-11105]	IRIS 313-11105	IRGC 132247	trop	3	C	G	G	G	C	C	A	A	C	A	G	G	T	G	T	C	G	G	A	C	T	T	C	A	G	G	C	G	T	C	C	A	T	T	G	C	C	G	A	T	T	C	T	C	A
D 4-193::IRGC 31083-2::[IRIS 313-11106]	IRIS 313-11106	IRGC 132330	trop	2.5	C	G	G	G	C	C	A	A	C	A	G	G	T	G	T	C	G	G	A	C	T	T	C	A	G	G	C	G	T	C	C	A	T	T	G	C	C	G	A	T	T	C	T	C	A
ZANTON::IRGC 31248-1::[IRIS 313-11107]	IRIS 313-11107	IRGC 132055	trop	3	C	G	G	G	C	C	A	A	C	A	G	G	T	G	T	C	G	G	A	C	T	T	C	A	G	G	C	G	T	C	C	A	T	T	G	C	C	G	A	T	T	C	T	C	A
B 12::IRGC 31293-1::[IRIS 313-11108]	IRIS 313-11108	IRGC 127194	ind3	4	C	G	G	G	C	C	A	A	C	A	G	G	T	G	T	C	G	G	A	C	T	G	C	A	G	G	C	G	T	T	C	A	T	T	G	C	C	G	A	T	T	C	T		A
B 106::IRGC 31352-1::[IRIS 313-11109]	IRIS 313-11109	IRGC 128231	trop	3	C	G	G	G	C	C	A	A	C	A	G	G	T	G	T	C	G	G	A	C	T	T	C	A	G	G	C	G	T	C	C	A	T	T	G	C	C	G	A	T	T	C	T	C	A
SAYAM::IRGC 31538-2::[IRIS 313-11110]	IRIS 313-11110	IRGC 128159	ind2	3	C	G	G	G	C	C	A	A	C	A	G		T	G	T	C	G	G	A	C	T	G	C	A	G	G	C	G	T	C	C	A	T	T	G	C	C	G	A	T	T	C	T	C	A
KAL SHULI::IRGC 31665-2::[IRIS 313-11113]	IRIS 313-11113	IRGC 128069	ind2	3	C	G	G	G	C	C	A	A	C	A	G	G	T	G	T	C	G	G	A	C	T	G	C	A	G	G	C	G	T	C	C	A	T	T	G	C	C	G	A	T	T	C	T	C	A
KALA MUNA::IRGC 31832-2::[IRIS 313-11115]	IRIS 313-11115	IRGC 128066	ind2	3	C	G	G	G	C	C	A	A	C	A	G	G	T	G	T	C	G	G	A	C	T	G	C	A	G	G	C	G	T	C	C	A	T	T	G	C	C	G	A	T	T	C	T	C	A
KAYELI KUNING::IRGC 31974-1::[IRIS 313-11117]	IRIS 313-11117	IRGC 127502	trop	1	C	G	G	G	C	C	A	A	T	A	G	G	T	G	T	C	G	G	A	C	T	T	C	A	G	G	C	A	T	C	C	A	T	T	G	C	C	G	A	T	T	C	T	C	A
NEP BUNG::IRGC 32207-1::[IRIS 313-11119]	IRIS 313-11119		indx	3	C	G	G	G	C	C	A	A	C	A	G	G	T	G	T	C	G	G	A	C	T	G	C	A	G	G	C	G	T	C	C	A	T	T	G	C	C	G	A	T	T	C	T	C	A
GURULEY::IRGC 32441-1::[IRIS 313-11120]	IRIS 313-11120	IRGC 127396	ind2	4	C	G	G	G	C	C	A	A	C	A	G	G	T	G	T	C	G	G	A	C	T	G	C	A	G	G	C	G	T	C	C	A	T	T	G	G	C	G	A	T	T	C	T	C	A
DHALA AMAN 973::IRGC 32861-1::[IRIS 313-11125]	IRIS 313-11125		admix	3	C	G	G	G	C	C	A	A	C	A	G	G	T	G	T	C	G	G	A	C	T	G	C	A	G	G	C	G	T	C	C	A	T	T	G	C	C	G	A	T	T	C	T	C	A
ANBAW::IRGC 32932-2::[IRIS 313-11126]	IRIS 313-11126	IRGC 127926	indx	3	C	G	G	G	C	C	A	A	C	A	G	G	T	G	T	C	G	G	A	C	T	G	C	A	G	G	C	G	T	C	C	A	T	T	G	C	C	G	A	T	T	C	T	C	A
BUBAW::IRGC 32989-2::[IRIS 313-11127]	IRIS 313-11127	IRGC 132307	subtrop	0	C	G	G	G	C	C	A	A	C	A	G	G	T	G	T	C	G	G	A	C	T	T	C	A	G	G	C	A	T	C	C	A	T	T	G	C	C	G	A	T	T	C	T	C	A
HAORU::IRGC 33090-2::[IRIS 313-11129]	IRIS 313-11129	IRGC 128051	indx	3	C	G	G	G	C	C	A	A	C	A	G	G	T	G	T	C	G	G	A	C	T	G	C	A	G	G	C	G	T	C	C	A	T	T	G	C	C	G	A	T	T	C	T	C	A
HTAWPATT::IRGC 33125-2::[IRIS 313-11130]	IRIS 313-11130	IRGC 128055	indx	3	C	G	G	G	C	C	A	A	C	A	G	G	T	G	T	C	G	G	A	C	T	G	C	A	G	G	C	G	T		C	A	T	T	G	C	C	G	A	T	T	C	T	C	A
KALAI::IRGC 33151-2::[IRIS 313-11131]	IRIS 313-11131	IRGC 132254	indx	3	C	G	G	G	C	C	A	A	C	A	G	G	T	G	T	C	G	G	A	C	T	G	C	A	G	G	C	G	T	C	C	A	T	T	G	C	C	G	A	T	T	C	T	C	A
LWANKHAN::IRGC 33330-1::[IRIS 313-11133]	IRIS 313-11133	IRGC 127582	ind3	3	C	G	G	G	C	C	A	A	C	A	G	G	T	G	T	C	G	G	A	C	T	G	C	A	G	G	C	G	T	C	C	A	T	T	G	C	C	G	A	T	T	C	T	C	A
MAUNG NYO::IRGC 33351-2::[IRIS 313-11135]	IRIS 313-11135	IRGC 128108	ind3	2.5	C	G	G	G	C	C	A	A	C	A	G	G	T	G	T	C	G	G	A	C	T	T/G	C			G	C	G	T	C	C	A	T	T	G	C	C	G	A	T	T	C	T	C	A
NGAKWE THETYIN::IRGC 33477-2::[IRIS 313-11136]	IRIS 313-11136	IRGC 128117	admix	3	C	G	G	G	C	C	A	A	C	A	G	G	T	G	T	C		G	A	C	T	T	C	A	G	G	C	G	T	C	C	A	T	T	G	C	C	G	A	T	T	C	T	C	A
NGASEIN THEEDAT (C 30)::IRGC 33504-2::[IRIS 313-11138]	IRIS 313-11138	IRGC 128119	ind3	3	C	G	G	G	C	C	A	A	C	A	G	G	T	G	T	C	G	G	A	C	T	G	C	A	G	G	C	G	T	C	C	A	T	T	G	C	C	G	A	T	T	C	T	C	A
NWACHI MANINE::IRGC 33531-2::[IRIS 313-11139]	IRIS 313-11139	IRGC 128120	indx	3	C	G	G	G	C	C	A	A	C	A	G	G	T	G	T	C	G	G	A	C	T	G	C	A	G	G	C	G	T	C	C	A	T	T	G	C	C	G	A	T	T	C	T	C	A
SHWENI::IRGC 33686-2::[IRIS 313-11141]	IRIS 313-11141	IRGC 128161	indx	3	C	G	G	G	C	C	A	A	C	A	G	G	T	G	T	C	G	G	A	C	T	G	C	A	G	G	C	G	T	C	C	A	T	T	G	C	C	G	A	T	T	C	T	C	A
TAUNGDI::IRGC 33746-2::[IRIS 313-11144]	IRIS 313-11144	IRGC 128181	indx	3	C	G	G	G	C	C	A	A	C	A	G	G	T	G	T	C	G	G	A	C	T	G	C	A	G	G	C	G	T	C	C	A	T	T	G	C	C	G	A	T	T	C	T	C	A
THAKADE THEEDAT::IRGC 33772-2::[IRIS 313-11145]	IRIS 313-11145	IRGC 128183	ind3	4	C	G	G	G	C	C	A	A	C	A	G	G	T	G	T	C	G	G	A	C	T	G	C	A	G	G	C	G	T	T	C	A	T	T	G	C	C	G	A	T	T	C	T	C	A
THEEDAT NGASEIN::IRGC 33779-2::[IRIS 313-11146]	IRIS 313-11146	IRGC 128185	indx	3	C	G	G	G	C	C	A	A	C	A	G	G	T	G	T	C	G	G	A	C	T	G	C	A	G	G	C	G	T	C	C	A	T	T	G	C	C	G	A	T	T	C	T	C	A
TYB 11::IRGC 33821-2::[IRIS 313-11147]	IRIS 313-11147	IRGC 128198	indx	3	C	G	G	G	C	C	A	A	C	A	G	G	T	G	T	C	G	G	A	C	T	G	C	A	G	G	C	G	T	C	C	A	T	T	G	C	C	G	A	T	T	C	T	C	A
YEBAW::IRGC 33875-2::[IRIS 313-11148]	IRIS 313-11148	IRGC 128203	ind3	4	C	G	G	G	C	C	A	A	C	A	G	G	T	G	T	C	G	G	A	C	T	G	C	A	G	G	C	G	T	T	C	A	T	T	G	C	C	G	A	T	T	C	T	C	A
ZEINGYI::IRGC 33923-2::[IRIS 313-11150]	IRIS 313-11150	IRGC 128206	ind3	3	C	G	G	G	C	C	A	A	C		G	G	T	G	T	C	G	G	A	C	T	G	C	A	G	G	C	G	T	C	C	A	T	T	G	C	C	G	A	T	T	C	T	C	A
K 113::IRGC 34107-1::[IRIS 313-11155]	IRIS 313-11155	IRGC 128326	temp	3	C	G	G	G	C	C	A	A	C	A	G	G	T	G	T	C	G	G	A	C	T	T	C	A	G	G	C	G	T	C	C	A	T	T	G	C	C	G	A	T	T	C	T	C	A
HYB 5-2-1-1-4::IRGC 34283-2::[IRIS 313-11159]	IRIS 313-11159	IRGC 132251	trop	2	C	G	G	G	C	C	A	A	C	A	G	G	T	G	T	C	G	G	A	C	T	T	C	A	G	G	C	G	T	C	C	A	T	T	G	C	C	G	A	T	T	C	T	C	A
B 38::IRGC 34409-1::[IRIS 313-11160]	IRIS 313-11160	IRGC 127195	ind3	4	C	G	G	G	C	C	A	A	C	A	G	G	T	G	T	C	G	G	A	C	T	G	C	A	G	G	C	G	T	T	C	A	T	T	G	C	C	G	A	T	T	C	T	C	A
SADU::IRGC 34514-2::[IRIS 313-11161]	IRIS 313-11161	IRGC 132266	trop	3	C	G	G	G	C	C	A	A	C	A	G	G	T	G	T	C	G	G	A	C	T	T	C	A	G	G	C	G	T	C	C	A	T	T	G	C	C	G	A	T	T	C	T	C	A
NATEL BORO::IRGC 34749-1::[IRIS 313-11163]	IRIS 313-11163	IRGC 127652	aus	3	C	G	G	G	C	C	A	A	C	A	G	G	T	G	T	C	G	G	A	C	T	G	C	A	G	G	C	G	T	C	C	A	T	T	G	C	C	G	A	T	T	C	T	C	A
BENA JHUPI::IRGC 34850-2::[IRIS 313-11165]	IRIS 313-11165	IRGC 127993	aus	4	C	G	G	G	C	C	A	A	C	A	G	G	T	G	T	C	G	G	A	C	T	G	C	A	G	G	C	G		C	C	A	T	T	G	G	C	G	A	T	T	C	T	C	A
BHUT MURI::IRGC 34861-1::[IRIS 313-11166]	IRIS 313-11166	IRGC 127224	aus	3	C	G	G	G	C	C	A	A	C	A	G	G	T	G	T	C	G	G	A	C	T	G	C	A	G	G	C	G	T	C	C	A	T	T	G	C	C	G	A	T	T	C	T	C	A
DUBRAJ::IRGC 34904-1::[IRIS 313-11167]	IRIS 313-11167	IRGC 127343	ind2	4	C	G	G	G	C	C	A	A	C	A	G	G	T	G	T	C	G	G	A	C	T	G	C	A	G	G	C	G	T	C	C	A	T	T	G	G	C	G	A	T	T	C	T	C	A
M 142::IRGC 35054-1::[IRIS 313-11171]	IRIS 313-11171	IRGC 127583	aus	3	C	G	G	G	C	C	A	A	C	A	G	G	T	G	T	C	G	G	A	C	T	G	C	A	G	G	C	G	T	C	C	A	T	T	G	C	C	G	A	T	T	C	T	C	A
SADA AUS::IRGC 35117-1::[IRIS 313-11173]	IRIS 313-11173	IRGC 127776	aus	3	C	G	G	G	C	C	A	A	C	A	G	G	T	G	T	C	G	G	A	C	T	G	C	A	G	G	C	G	T	C	C	A	T	T	G	C	C	G	A	T	T	C	T	C	A
SONA AUS::IRGC 35160-1::[IRIS 313-11175]	IRIS 313-11175	IRGC 127821	aus	3	C	G	G	G	C	C	A	A	C	A	G	G	T	G	T	C	G	G	A	C	T	G	C	A	G	G	C	G	T	C	C	A	T	T	G	C	C	G	A	T	T	C	T	C	A
SXC 216::IRGC 35175-1::[IRIS 313-11176]	IRIS 313-11176	IRGC 127831	indx	3	C	G	G	G	C	C	A	A	C	A	G	G	T	G	T	C	G	G	A	C	T	G	C	A	G	G	C	G	T	C	C	A	T	T	G	C	C	G	A	T	T	C	T	C	A
DELI POCONG::IRGC 35265-1::[IRIS 313-11177]	IRIS 313-11177	IRGC 127309	indx	3	C	G	G	G	C	C	A	A	C	A	G	G	T	G	T	C	G	G	A	C	T	G	C	A	G	G	C	G	T	C	C	A	T	T	G	C	C	G	A	T	T	C	T	C	A
SIPULUIK ARANG::IRGC 35488-2::[IRIS 313-11180]	IRIS 313-11180	IRGC 128166	ind3	4	C	G	G	G	C	C	A	A	C	A	G	G	T	G	T	C	G	G	A	C	T	G	C	A	G	G	C	G	T	C	C	A	T	T	G	G	C	G	A	T	T	C	T	C	A
TAMBA PERAK::IRGC 35534-2::[IRIS 313-11181]	IRIS 313-11181	IRGC 128179	ind3	3	C	G	G	G	C	C	A	A	C	A	G	G	T	G	T	C	G	G	A	C	T	G	C	A	G	G	C	G	T	C	C	A	T	T	G	C	C	G	A	T	T	C	T	C	A
KETAN LEMBAYUNGAN::IRGC 35745-2::[IRIS 313-11183]	IRIS 313-11183	IRGC 132311	trop	3	C	G	G	G	C	C	A	A	C	A	G	G	T	G	T	C	G	G	A	C	T	T	C	A	G	G	C	G	T	C	C	A	T	T	G	C	C	G	A	T	T	C	T	C	A
PAIZ AMBARBU::IRGC 36179-1::[IRIS 313-11189]	IRIS 313-11189	IRGC 128424	admix	3	C	G	G	G	C	C	A	A	C	A	G	G	T	G	T	C	G	G	A	C	T	T	C	A	G	G	C	G	T	C	C	A	T	T	G	C	C	G	A	T	T	C	T	C	A
RANRUWAN::IRGC 36360-1::[IRIS 313-11191]	IRIS 313-11191	IRGC 127763	aus	3	C	G	G	G	C	C	A	A	C	A	G	G	T	G	T	C	G	G	A	C	T	G	C	A	G	G	C	G	T	C	C	A	T	T	G	C	C	G	A	T	T	C	T	C	A
GAHB AWY 2-1::IRGC 36549-2::[IRIS 313-11193]	IRIS 313-11193	IRGC 128040	ind3	3	C	G	G	G	C	C	A	A	C	A	G	G	T	G	T	C	G	G	A	C	T	G	C	A	G	G	C	G	T	C	C	A	T	T	G	C	C	G	A	T	T	C	T	C	A
KHAO PAH 8-5-38::IRGC 36587-1::[IRIS 313-11194]	IRIS 313-11194	IRGC 135760	ind3	3	C	G	G	G	C	C	A	A	C	A	G	G	T	G	T	C	G	G	A	C	T	G	C	A	G	G	C	G	T	C	C	A	T	T	G	C	C	G	A	T	T	C	T	C	A
KHAW KAR 13::IRGC 36711-1::[IRIS 313-11195]	IRIS 313-11195	IRGC 128344	subtrop	1	C	G	G	G	C	C	A	A	C	A	G	G	T	G	T	C	G	G	A	C	T	T	C	A	G	G	C	A	T	C	C	A	T	T	G	C	C	G	A	T	T	C	T	C	A
K 78-13::IRGC 36794-2::[IRIS 313-11198]	IRIS 313-11198	IRGC 132425	temp	0	C	G	G	G	C	C	A	A	C	A	G	G	T	G	T	C		G	A	C	T	T	C	A	G	G	C	A	T	C	C	A	T	T	G	C	C	G	A	T	T	C	T	C	A
CHING HSI 15::IRGC 36852-1::[IRIS 313-11201]	IRIS 313-11201	IRGC 135564	temp	0	C	G	G	G	C	C	A	A	C	A	G	G	T	G	T	C	G	G	A	C	T	T	C	A	G	G	C	A	T	C	C	A	T	T	G	C	C	G	A	T	T	C	T	C	A
KAZALSAIL::IRGC 37161-2::[IRIS 313-11205]	IRIS 313-11205	IRGC 128075	ind2	3	C	G	G	G	C	C	A	A	C	A	G	G	T	G	T	C	G	G	A	C	T	G	C	A	G	G	C	G	T	C	C	A	T	T	G	C	C	G	A	T	T	C	T	C	A
KUMRI::IRGC 37182-2::[IRIS 313-11206]	IRIS 313-11206	IRGC 128092	indx	3	C	G	G	G	C	C	A	A	C	A	G	G	T	G	T	C	G	G	A	C	T	G	C	A	G	G	C	G	T	C	C	A	T	T	G	C	C	G	A	T	T	C	T	C	A
PAIRJAT::IRGC 37252-2::[IRIS 313-11207]	IRIS 313-11207	IRGC 128126	ind2	3	C	G	G	G	C	C	A	A	C	A	G	G	T	G	T	C	G	G	A	C	T	G	C	A	G	G	C	G	T	C	C	A	T	T	G	C	C	G	A	T	T	C	T	C	A
VADAI::IRGC 37341-1::[IRIS 313-11209]	IRIS 313-11209	IRGC 135806	ind2	3	C	G	G	G	C	C	A	A	C	A	G	G	T	G	T	C	G	G	A	C	T	G	C	A	G	G	C	G	T	C	C	A	T	T	G	C	C	G	A	T	T	C	T	C	A
ZARBASAIL::IRGC 37346-1::[IRIS 313-11210]	IRIS 313-11210	IRGC 127911	aus	3	C	G	G	G	C	C	A	A	C	A	G	G	T	G	T	C	G	G	A	C	T	G	C	A	G	G	C	G	T	C	C	A	T	T	G	C	C	G	A	T	T	C	T	C	A
KADAMSAIL::IRGC 37468-2::[IRIS 313-11211]	IRIS 313-11211	IRGC 128063	ind2	2.5	C	G	G	G	C	C	A	A	C	A	G	G	T	G	T	C	G	G	A	C	T	G	C	A	G	G	C	G	T	C	C	A	T	T	G	C	C	G	A	T	T	C	T	C	A
KALOBONA::IRGC 37478-2::[IRIS 313-11212]	IRIS 313-11212	IRGC 132309	ind2	3	C	G	G	G	C	C	A	A	C	A	G	G	T	G	T	C	G	G	A	C	T	G	C	A	G	G	C	G	T	C	C	A	T	T	G	C	C	G	A	T	T	C	T	C	A
NARIKEL BADI::IRGC 37550-1::[IRIS 313-11213]	IRIS 313-11213	IRGC 127648	aus	3	C	G	G	G	C	C	A	A	C	A	G	G	T	G	T	C	G	G	A	C	T	G	C	A	G	G	C	G	T	C	C	A	T	T	G	C	C	G	A	T	T	C	T	C	A
KHAMA 1183::IRGC 37685-2::[IRIS 313-11216]	IRIS 313-11216	IRGC 128082	aus	3	C	G	G	G	C	C	A	A	C	A	G	G	T	G	T	C	G	G	A	C	T	G	C	A	G	G	C	G	T	C	C	A	T	T	G	C	C	G	A	T	T	C	T	C	A
LAL AMAN 207::IRGC 37754-1::[IRIS 313-11217]	IRIS 313-11217		aro	3	C	G	G	G	C	C	A	A	C	A	G	G	T	G	T	C	G	G	A	C	T	T	C	A	G	G		G	T	C	C	A	T	T	G	C	C	G	A	T	T	C	T	C	A
BADSHABHOG 4-60::IRGC 37793-2::[IRIS 313-11218]	IRIS 313-11218	IRGC 127982	aro	3	C	G	G	G	C	C	A	A	C	A	G	G	T	G	T	C	G	G	A	C	T	T	C	A	G	G	C	G	T	C	C	A	T	T	G	C	C	G	A	T	T	C	T	C	A
BLACK 28-564::IRGC 37815-2::[IRIS 313-11219]	IRIS 313-11219	IRGC 127998	ind2	3	C	G	G	G	C	C	A	A	C	A	G	G	T	G	T	C	G	G	A	C	T	G	C	A	G	G	C	G	T	C	C	A	T	T	G	C	C	G	A	T	T	C	T	C	A
OVAL RED 29 B 601::IRGC 38130-2::[IRIS 313-11223]	IRIS 313-11223	IRGC 128122	aro	3	C	G	G	G	C	C	A	A	C	A	G	G	T	G	T	C	G	G	A	C	T	T/G	C	A	G	G	C	G	T	C	C	A	T	T	G	C	C	G	A	T	T	C	T	C	A
PATNAI 31-679::IRGC 38149-2::[IRIS 313-11224]	IRIS 313-11224	IRGC 128130	ind2	3	C	G	G	G	C	C	A	A	C	A	G	G	T	G	T	C	G	G	A	C	T	T	C	A	G	G	C	G	T	C	C	A	T	T	G	C	C	G	A	T	T	C	T	C	A
SADAJIRA (DEEP STRAW) 16-194::IRGC 38251-2::[IRIS 313-11225]	IRIS 313-11225	IRGC 132265	indx	2.5	C	G	G	G	C	C	A	A	C	A	G	G	T	G	T	C	G	G	A	C	T	T/G	C	A	G	G	C	G	T	C	C	A	T	T	G	C	C	G	A	T	T	C	T	C	A
SADAJIRA 19-258::IRGC 38293-2::[IRIS 313-11226]	IRIS 313-11226	IRGC 128153	ind2	3	C	G	G	G	C	C	A	A	C	A	G	G	T	G	T	C	G	G	A	C	T	G	C	A	G	G	C	G	T	C	C	A	T	T	G	C	C	G	A	T	T	C	T	C	A
SADAJIRA 19-317::IRGC 38344-2::[IRIS 313-11227]	IRIS 313-11227	IRGC 128154	ind2	4	C	G	G	G	C	C	A	A	C	A		G	T	G	T	C	G	G	A	C	T	G	C	A	G	G	C	G	T	C	C	A	T	T	G	G	C	G	A	T	T	C	T	C	A
STRAW 23-428::IRGC 38416-2::[IRIS 313-11229]	IRIS 313-11229	IRGC 128171	ind2	3	C	G	G	G	C	C	A	A	C	A	G	G	T	G	T	C	G	G	A	C	T	G	C	A	G	G	C	G	T	C	C	A	T	T	G	C	C	G	A	T	T	C	T	C	A
STRAW 23-438::IRGC 38426-2::[IRIS 313-11230]	IRIS 313-11230	IRGC 128172	ind2	4	C	G	G	G	C	C	A	A	C	A	G	G	T	G	T	C	G	G	A	C	T	G	C	A	G	G	C	G	T	C	C	A	T	T	G	G	C	G	A	T	T	C	T	C	A
STRAW 23-471::IRGC 38456-1::[IRIS 313-11231]	IRIS 313-11231	IRGC 135799	ind2	2.5	C	G	G	G	C	C	A	A	C	A	G	G	T	G	T	C	G	G	A	C	T	T/G	C	A	G	G	C	G	T	C	C	A	T	T	G	C	C	G	A	T	T	C	T	C	A
R 146::IRGC 38606-1::[IRIS 313-11232]	IRIS 313-11232	IRGC 128442	aus	3	C	G	G	G	C	C	A	A	C	A	G	G	T	G	T	C	G	G	A	C	T	G	C	A	G	G	C	G	T	C	C	A	T	T	G	C	C	G	A	T	T	C	T	C	A
LIGUNGTUNG::IRGC 38786-1::[IRIS 313-11234]	IRIS 313-11234	IRGC 127563	indx	3	C	G	G	G	C	C	A	A	C	A	G	G	T	G	T	C	G	G	A	C	T	G	C	A	G	G	C	G	T	C	C	A	T	T	G	C	C	G	A	T	T	C	T	C	A
PINILING DANIEL::IRGC 38828-2::[IRIS 313-11235]	IRIS 313-11235	IRGC 128137	indx	3	C	G	G	G	C	C	A	A	C	A	G	G	T	G	T	C	G	G	A	C	T	T	C	A	G	G	C	G	T	C	C	A	T	T	G	C	C	G	A	T	T	C	T	C	A
TAICHUNG SEN YU 214::IRGC 38899-1::[IRIS 313-11237]	IRIS 313-11237	IRGC 127835	ind1B	4	C	G	G	G	C	C	A	A	C	A	G	G	T	G	T	C	G	G	A	C	T	G	C	A	G	G	C	G	T	C	C	A	T	T	G	G	C	G	A	T	T	C	T	C	A
IAC 1132::IRGC 39052-1::[IRIS 313-11238]	IRIS 313-11238		trop	1	C	G	G	G	C	C	A	A	T	A	G	G	T	G	T	C	G	G	A	C	T		C	A	G	G		A	T	C	C	A	T	T	G	C	C	G	A	T	T	C	T	C	A
BR 116-3B-53::IRGC 39559-2::[IRIS 313-11241]	IRIS 313-11241	IRGC 128001	ind2	3	C	G	G	G	C	C	A	A	C	A	G	G	T	G	T	C	G	G	A	C	T	G	C	A	G	G	C	G	T	C	C	A	T	T	G	C	C	G	A	T	T	C	T	C	A
OR 117-8::IRGC 39680-2::[IRIS 313-11242]	IRIS 313-11242	IRGC 128121	ind2	4	C	G	G	G	C	C	A	A	C	A	G	G	T	G	T	C	G	G	A	C	T	G	C	A	G	G	C	G	T	C	C	A	T	T	G	G	C	G	A	T	T	C	T	C	A
W 1014-162::IRGC 39871-1::[IRIS 313-11244]	IRIS 313-11244		indx	3	C	G	G	G	C	C	A	A	C	A	G	G	T	G	T	C	G	G	A	C	T	G	C	A	G	G	C	G	T	C	C	A	T	T	G	C	C	G	A	T	T	C	T	C	A
RP 1153-20-14::IRGC 40131-2::[IRIS 313-11247]	IRIS 313-11247	IRGC 132431	indx	4	C	G	G	G	C	C	A	A	C	A	G	G	T	G	T	C	G	G	A	C	T	G	C	A	G	G	C	G	T	C	C	A	T	T	G	G	C	G	A	T	T	C	T	C	A
IR 4535-PP 23-6-8-1::IRGC 40402-2::[IRIS 313-11249]	IRIS 313-11249	IRGC 132341	indx	4	C	G	G	G	C	C	A	A	C	A	G	G	T	G	T	C	G	G	A	C	T	G	C	A	G	G	C	G	T	C	C	A	T	T	G	G	C	G	A	T	T	C	T	C	A
SML CAMPONI::IRGC 40642-1::[IRIS 313-11253]	IRIS 313-11253		indx	3	C	G	G	G	C	C	A	A	C	A	G	G	T	G	T	C	G	G	A	C	T	G	C	A	G	G	C	G	T	C	C	A	T	T	G	C	C	G	A	T	T	C	T	C	A
ARC 7056::IRGC 40914-1::[IRIS 313-11255]	IRIS 313-11255	IRGC 127167	indx	3	C	G	G	G	C	C	A	A	C	A	G	G			T	C	G	G	A	C	T	G	C	A	G	G	C	G	T	C	C	A	T	T	G	C	C	G	A	T	T	C	T	C	A
ARC 12411::IRGC 41047-2::[IRIS 313-11256]	IRIS 313-11256	IRGC 127941	indx	3	C	G	G	G	C	C	A	A	C	A	G	G	T	G	T	C	G	G	A	C	T	G	C	A	G	G	C	G	T	C	C	A	T	T	G	C	C	G	A	T	T	C	T	C	A
ARC 12757::IRGC 41095-2::[IRIS 313-11257]	IRIS 313-11257	IRGC 127944	indx	3.5	C	G	G	G	C	C	A	A	C	A	G	G	T	G	T	C	G	G	A	C	T	G	C	A	G	G	C	G	T	C	C	A	T	T	G	C/G	C	G	A	T	T	C	T	C	A
ARC 13502::IRGC 41126-2::[IRIS 313-11258]	IRIS 313-11258	IRGC 127948	aro	3	C	G	G	G	C	C	A	A	C	A	G	G	T	G	T	C	G	G	A	C	T	T	C	A	G	G	C	G	T	C	C	A	T	T	G	C	C	G	A	T	T	C	T	C	A
ARC 13515::IRGC 41134-2::[IRIS 313-11259]	IRIS 313-11259	IRGC 127949	aro	1			G	G	C	C	A	A	C	A	G	G	T	G	T	C	G	G	A	C	T	T	C	A	G	G	C		T	C	C	A	T	T	G	C	C	G	A	T	T	C	T	C	A
ARC 13591::IRGC 41177-2::[IRIS 313-11260]	IRIS 313-11260	IRGC 127950	indx	3	C	G	G	G	C	C	A	A	C	A	G	G	T	G	T	C	G	G	A	C	T	G	C	A	G	G	C	G	T	C	C	A	T	T	G	C	C	G	A	T	T	C	T	C	A
ARC 13785::IRGC 41218-2::[IRIS 313-11261]	IRIS 313-11261	IRGC 127951	indx	3	C	G	G	G	C	C	A	A	C	A	G	G	T	G	T	C	G	G	A	C	T	G	C	A	G	G	C	G	T	C	C	A	T	T	G	C	C	G	A	T	T	C	T	C	A
ARC 13888::IRGC 41288-2::[IRIS 313-11262]	IRIS 313-11262	IRGC 127952	indx	3	C	G	G	G	C	C	A	A	C	A	G	G	T	G	T	C	G	G	A	C	T	G	C	A	G	G	C	G	T	C	C	A	T	T	G	C	C	G	A	T	T	C	T	C	A
[truncated: 1,029 more rows]
[truncated: 407 more columns]
