# Supplementary material for: Genome-wide association analysis uncovers rice blast resistance alleles of Ptr and Pia
Source: Commun Biol. 2024 May 20;7:607. doi: 10.1038/s42003-024-06244-z (PMC11106262; doi:10.1038/s42003-024-06244-z)
Supplement: Supplementary file 6 — Supplementary Data 4 [file 42003_2024_6244_MOESM6_ESM.xlsx]

## Sheet: Ptr
Ptr coding sequence variants in sequenced accessions														Platinum rice genomes	Genomes sequenced here
						Genotype_1	Genotype	IRIS_or_common_name	Coverage	Identity	Variant	Funtional Allele	Validated	3K rice genomes annotations	ASSAY ID - 3K rice genomes	ACCESSION - 3k rice genomes	Variant subgroup
Variant	# genotypes	Functional Allele	Variant Subgroup		1	247_Ptr_Genomic+_(+1)	IRIS_313-10314	IRIS_313-10314	1	1	1	Ptrb	Yes	INIAP 10::IRGC 117000-1::[IRIS 313-10314]	IRIS 313-10314	IRGC 125969	b
1	5	Ptrb	b		2	101_10738_surrounding_Ptr_from_c	IRIS_313-10738	IRIS_313-10738	1	1	1	Ptrb	Yes	ANDEL WELUT::IRGC 16339-1::[IRIS 313-10738]	IRIS 313-10738	IRGC 131965	b
2	1	Ptrb + 1 AA insertion	b		3	208_8554_surrounding_Ptr_fro_con	IRIS_313-8554	IRIS_313-8554	1	1	1	Ptrb	Yes	ARC 11959::IRGC 21780-1::[IRIS 313-8554]	IRIS 313-8554	IRGC 121188	b
3	1	Likely	b		4	CM020693.1:1018551710196517_(+1)	Oryza sativa Indica Group - IRRI:IRGC 53418-1	IRIS_313-11480	1	1	1	Ptrb	Yes	PR 106::IRGC 53418-1::[IRIS 313-11480]	IRIS 313-11480	IRGC 127742	b
4	1	Likely	b		5	CM020765.1:1120341911214419_(+1)	Oryza sativa Indica Group - IRRI:IRGC 52339-1	IRIS_313-8568	1	1	1	Ptrb	Yes	LARHA MUGAD::IRGC 52339-1::[IRIS 313-8568]	IRIS 313-8568	IRGC 125619	b
5	3	Ptra	a		6	CM020705.1:1031729210328292_(+1)	Oryza sativa aromatic subgroup - IRRI:IRGC 12485-1	IRIS_313-8813	1	0.999	2	Likely, Ptrb + 1 AA insertion	Yes	ARC 10497::[IRIS 313-8813]	IRIS 313-8813	IRGC 117425	b
6	4	Unknown	e		7	104_12190_surrounding_Ptr_from_c	IRIS_313-12190	IRIS_313-12190	1	0.987	3	Likely, Ptrb & Ptrc GWAS peaks	No	CHAO KHAW NYAO::IRGC 89460-1::[IRIS 313-12190]	IRIS 313-12190	IRGC 131975	b
7	4	Ptrc -GWAS	c		8	O.Longistaminata	O.Longistaminata	O.Longistaminata	99.90% *Partial enomic sequence available so only B isoform (minus N terminal 44 AA)	0.986	4	Likely (Pi57(t) loci includes Ptr)					b?	Variable amino acids in C terminus may provide altered specificity
8	2	Ptrc -GWAS	c		9	Chr12:10819534..10833768_Nip_Ptr	Nipponbare	Nipponbare	0.999	0.934	10	Unknown	NA	NIPPONBARE::[CX140]	CX140	IRGC 136196	d
9	1	Unknown	d		10	189_7914_surrounding_Ptr_from_co	IRIS_313-7914	IRIS_313-7914	0.999	0.934	10	Unknown	NA	IRAT 112::C1::[IRIS 313-7914]	IRIS 313-7914	IRGC 122115	d
10	4	Unknown	d		11	YT16	YT16	YT16	0.999	0.934	10	Unknown	NA				d
11	1	Unknown	d		12	CM020644.1:1068640510697637_(+1)	Oryza sativa Japonica Group cultivar Azucena - Azucena	AZUCENA	0.999	0.934	10	Unknown	NA	AZUCENA::[CX151]	CX151	IRGC 117264	d
12	1	Unknown	d		13	CM020741.1:1001287210024107_(+1)	Oryza sativa aus subgroup - IRRI:IRGC 34749-1	IRIS_313-11163	0.999	0.934	9	Unknown	NA	NATEL BORO::IRGC 34749-1::[IRIS 313-11163]	IRIS 313-11163	IRGC 127652	d?	Variable amino acids in C terminus may provide altered specificity
13	1	Likely	d		14	120_11127_surrounding_Ptr_from_c	IRIS_313-11127	IRIS_313-11127	0.999	0.932	11	Unknown	NA	BUBAW::IRGC 32989-2::[IRIS 313-11127]	IRIS 313-11127	IRGC 132307	d?	Variable amino acids in C terminus may provide altered specificity
14	1	No - premature stop			15	128_11360_surrounding_Ptr_from_c	IRIS_313-11360	IRIS_313-11360	0.999	0.933	12	Unknown	NA	JALADHI 1::IRGC 45858-2::[IRIS 313-11360]	IRIS 313-11360	IRGC 132342	d?	Variable amino acids in C terminus may provide altered specificity
					16	BHA	BHA	BHA	0.985	0.932	13	Likely (BHA QTL including Ptr)					d?	Variable amino acids in C terminus may provide altered specificity
					17	Ptr_Katy_Genomic_(+1)	Katy	Katy	0.994	0.931	5	Ptra	Yes	KATY::IRGC 77140-1::[IRIS 313-8285]	IRIS 313-8285	IRGC 125614	a
					18			Pi4	0.994	0.931	5	Ptra	Yes				a
					19	CM020887.1:99651759977118_(+1)	IR64	IR64	0.994	0.931	5	Ptra	Yes	IR64A::[CX403]	CX403		a
					20	84_11786_surrounding_Ptr_from_co	IRIS_313-11786	IRIS_313-11786	0.999	0.936	6	Unknown	NA	N'YA NOFF::IRGC 69749-1::[IRIS 313-11786]	IRIS 313-11786	IRGC 128411	e
					21	Ptr_Amane_Genomic_(+1)	Amane	Amane	0.999	0.936	6	Unknown	NA				e
					22	CM020729.1:1048934910501304_(+1)	Oryza sativa Indica Group - IRRI:IRGC 65972-1	IRIS_313-11708	0.999	0.936	6	Unknown	NA	KHAO YAI GUANG::IRGC 65972-1::[IRIS 313-11708]	IRIS 313-11708	IRGC 127518	e
					23	CM020717.1:1033690410348859_(+1)	Oryza sativa tropical japonica subgroup - IRRI:IRGC 19961-2	IRIS_313-10841	0.999	0.936	6	Unknown	NA	KETAN NANGKA::IRGC 19961-2::[IRIS 313-10841]	IRIS 313-10841	IRGC 128077	e
					24	CO39	CO39	CO39	0.999	0.936	6	Unknown	NA				e
					25	329_10879_surrounding_Ptr_from_c	IRIS_313-10879	IRIS_313-10879	0.999	0.937	7	Ptrc -GWAS	No	ARC 12124::IRGC 21929-1::[IRIS 313-10879]	IRIS 313-10879	IRGC 127145	c
					26	CM020681.1:1003810510050060_(+1)	Oryza sativa Indica Group - IRRI:IRGC 26624-2	IRIS_313-10985	0.999	0.937	7	Ptrc -GWAS	No	GOBOL SAIL (BALAM)::IRGC 26624-2::[IRIS 313-10985]	IRIS 313-10985	IRGC 132424	c
					27	CM020657.1:999941310011368_(+1)	Oryza sativa Indica Group - IRRI:IRGC 81487-1	IRIS_313-12048	0.999	0.937	7	Ptrc -GWAS	No	LIMA::IRGC 81487-1::[IRIS 313-12048]	IRIS 313-12048	IRGC 127564	c
					28	CM020753.1:1086596210877916_(+1)	Oryza sativa tropical japonica subgroup - IRRI:IRGC 80273-1	IRIS_313-12029	0.999	0.937	7	Ptrc -GWAS	No	CHAO MEO::IRGC 80273-1::[IRIS 313-12029]	IRIS 313-12029	IRGC 132278	c
					29			Pi1	0.999	0.936	8	Ptrc	No				c
					30	295_10059_surrounding_Ptr_from_c	IRIS_313-10059	IRIS_313-10059	0.999	0.936	8	Ptrc -GWAS	No	DACHEONGBYEO::IRGC 72533-1::[IRIS 313-10059]	IRIS 313-10059	IRGC 125717	c
					31	CM020669.1:1006411910076076_(+1)	Oryza sativa cultivar - LIU XU::IRGC 109232-1	IRIS_313-10239	0.304	0.978	14	Premature stop	NA	LIU XU::IRGC 109232-1::[IRIS 313-10239]	IRIS 313-10239	IRGC 125827	Truncated

## Sheet: RGA4
RGA4 coding sequence variants in sequenced accessions
Variant	# genotypes	Intact				Genotype_1	Genotype	IRIS_or_other	Coverage	Identity	RGA4 variant	Funtional RGA5	Validated	RGA4 type	Genotype_1	Genotype	IRIS_or_other	Coverage	Identity	RGA5 variant	HMA variant	Funtional Allele
1	7				1	IRRI:IRGC_26624-2	IRRI:IRGC 26624-2	IRIS_313-10985	1	1	2	Likely - 1 AA change compared to Sasanishki		1	CM020680.1:6756955-6765659_(+1)	IRRI:IRGC 26624-2	IRIS_313-10985	0.997	0.964	8	7	Likely - 1 AA change compared to Sasanishki
2	1				2	247_10314_surrounding_Pia_(+1)	IRIS_10314	IRIS_313-10314	1	0.999	1	Likely (same HMA domain as variant 3)		1	247_10314_surrounding_Pia_(+1)	IRIS_10314	IRIS_313-10314	0.997	0.958	4	3	Likely (same HMA domain as variant 3)
3	1				3	CO39	CO39	CO39	1	0.998	3	Yes		1	CO39	CO39	CO39	1	0.998	10	8	Yes
4	1				4	84_11786_surrounding_Pia-RC_(+1)	IRIS_11786	IRIS_313-11786	1	0.999	1	Yes - HMA variant 3	Yes - here	1	84_11786_surrounding_Pia-RC_(+1)	IRIS_11786	IRIS_313-11786	0.997	0.958	3	3	Yes
5	1				5	295_10059_surrounding_Pia-RC_(+1	IRIS_10059	IRIS_313-10059	1	0.999	1	Yes	Yes - here	1	295_10059_surrounding_Pia-RC_(+1	IRIS_10059	IRIS_313-10059	0.997	0.966	1	1	Yes
6	1				6	RGA4_Sasanishki_CDS_(+1)	Sasanishki	Sasanishki	1	0.999	1	Yes	Yes - previously	1	AB604627_/_RGA5_Sasanishki	Sasanishki	Sasanishki	0.997	0.966	1	1	Yes
7	1				7	IRRI:IRGC_52339-1	IRRI:IRGC 52339-1	IRIS_313-8568	1	0.999	1	No - Premature stop		1	CM020764.1:6736734-6745449_(+1)	IRRI:IRGC 52339-1	IRIS_313-8568	0.673	0.667	12	No	No - Premature stop
8	1				8	IRRI:IRGC_53418-1	IRRI:IRGC 53418-1	IRIS_313-11480	1	0.999	1	Likely (same HMA domain as variant 3)		1	CM020692.1:6612269-6620982_(+1)	IRRI:IRGC 53418-1	IRIS_313-11480	0.997	0.958	4	3	Likely (same HMA domain as variant 3)
9	4				9	IR64	IR64	IR64	1	0.999	1	Likely (same HMA domain as variant 3)		1	CM020886.1:6595439-6604152_(+1)	IR64	IR64	0.997	0.958	4	3	Likely (same HMA domain as variant 3)
10	3				10	IRRI:IRGC_81487-1	IRRI:IRGC 81487-1	IRIS_313-12048	0.999	0.998	4	Likely (same HMA domain as variant 8)		1	CM020656.1:6908000-6916704_(+1)	IRRI:IRGC 81487-1	IRIS_313-12048	1	1	9	8	Likely (same HMA domain as variant 8)
11	1	Yes			11	IRRI:IRGC_12485-1	IRRI:IRGC 12485-1	IRIS_313-8813	0.996	0.947	5	Likely - 2 AA change compared to 12190		2	CM020704.1:6464019-6472715_(+1)	IRRI:IRGC 12485-1	IRIS_313-8813	1	0.97	6	5	Likely - 2 AA change compared to 12190
12	1	No			12	104_12190_surrrounding_Pia_(+1)	IRIS_12190	IRIS_313-12190	0.996	0.944	6	Yes	Yes - here	2	104_12190_surrrounding_Pia_(+1)	IRIS_12190	IRIS_313-12190	1	0.97	5	4	Yes
13	1	No			13	128_11360_surrounding_Pia-RC_(+1	IRIS_11360	IRIS_313-11360	0.996	0.944	7	No - Premature stop imediately after HMA domain		2	128_11360_surrounding_Pia-RC_(+1	IRIS_11360	IRIS_313-11360	0.97	0.966	7	6	No - Premature stop imediately after HMA domain
14	1	No			14	189_7914_surrounding_Pia_(+1)	IRIS_7914	IRIS_313-7914	0.997	0.944	8	LOC_Os11g11810.1-like		3
					15	101_10738_surrounding_Pia_(+1)	IRIS_10738	IRIS_313-10738	0.997	0.943	10	LOC_Os11g11810.1-like		3
					16	Azucena	Azucena	Azucena	0.997	0.943	10	LOC_Os11g11810.1-like		3
					17	IRRI:IRGC_19961-2	IRIS_313-10841	IRIS_313-10841	0.997	0.943	10	LOC_Os11g11810.1-like		3
					18	329_10879_surrounding_Pia_(+1)		IRIS_313-10879	0.997	0.947	9	Pias-2 like		3
					19	208_8554_surrounding_Pia_(+1)		IRIS_313-8554	0.997	0.947	9	Pias-2 like		3
					20	IRRI:IRGC_80273-1		IRIS_313-12029	0.997	0.947	9	Pias-2 like		3
					21	IRRI:IRGC_65972-1		IRIS_313-11708	0.997	0.947	9	LOC_Os11g11810.1-like		3
					22	Keiboba	Keiboba	Keiboba	0.997	0.936	11	Pias-2		3
					23	IRRI:IRGC_34749-1		IRIS_313-11163	61 AA Deletion, Premature STOP (682 AA protein)		12	Pias-2 like
					24	LIU XU::IRGC 109232-1		IRIS_313-10239	Single nucleotide deletion resulting in frameshift (120 AA protein)		13	No - Premature stop			13	CM020668.1:6955968-6964666_(+1)	LIU XU::IRGC 109232-1	IRIS_313-10239	0.865	0.955	11	No	No - Premature stop
					25	120_11127		IRIS_313-11127	Single nucleotide deletion resulting in frameshift (453 AA protein)		14	LOC_Os11g11810.1-like
															14	AB604628_/_RGA5_93-11_(+1)	93-11	93-11	0.997	0.96	2	2	Yes
															15	Aichi_Asahi	Aichi Asahi	Aichi Asahi	0.997	0.966	1	1	Yes

## Sheet: RGA5
Sas-like RGA5 coding sequence variants in sequenced accessions
						Genotype_1	Genotype	IRIS_or_other	Indica or Japonica	SubGroup	Coverage	Identity	RGA5 variant	HMA variant	Funtional Allele
Variant	# genotypes	Intact			1	CM020656.1:6908000-6916704_(+1)	IRRI:IRGC 81487-1	IRIS_313-12048	Indica	ind3	1	1	9	4	Likely (same HMA domain as variant 8)
1	3				2	CO39	CO39	IRIS_313-8265	Indica	indx	1	0.998	10	4	Yes
2	1				2	CM020668.1:6955968-6964666_(+1)	LIU XU::IRGC 109232-1	IRIS_313-10239	Indica	indx	0.865	0.955	11	No	No - Premature stop
3	1				3	CM020764.1:6736734-6745449_(+1)	IRRI:IRGC 52339-1	IRIS_313-8568	Indica	indica	0.673	0.667	12	No	No - Premature stop
4	3				4	84_11786_surrounding_Pia-RC_(+1)	IRIS_11786	IRIS_313-11786	Indica	ind3	0.997	0.958	3	3	Yes
5	1				5	AB604628_/_RGA5_93-11_(+1)	93-11	93-11	Indica	indica	0.997	0.96	2	2	Likely Yes - see results section
6	1				6	247_10314_surrounding_Pia_(+1)	IRIS_10314	IRIS_313-10314	Indica	indx	0.997	0.958	4	3	Likely (same HMA domain as RGA5 variant 3)
7	1	No			7	CM020886.1:6595439-6604152_(+1)	IR64	IR64	Indica	ind1B	0.997	0.958	4	3	Likely (same HMA domain as RGA5 variant 3)
8	1				8	CM020692.1:6612269-6620982_(+1)	IRRI:IRGC 53418-1	IRIS_313-11480	Indica	ind1B	0.997	0.958	4	3	Likely (same HMA domain as RGA5 variant 3)
9	1				9	AB604627_/_RGA5_Sasanishki	Sasanishki	Sasanishki	Japonica	?	0.997	0.966	1	1	Yes
10	1				10	295_10059_surrounding_Pia-RC_(+1	IRIS_10059	IRIS_313-10059	Japonica	temp	0.997	0.966	1	1	Yes
11	1	No			11	Aichi_Asahi	Aichi Asahi	Aichi Asahi	Japonica	?	0.997	0.966	1	1	Yes
12	1	No			12	CM020680.1:6756955-6765659_(+1)	IRRI:IRGC 26624-2	IRIS_313-10985	Indica	ind2	0.997	0.964	8	8	Possible - 1 AA change compared to Sasanishki
					13	128_11360_surrounding_Pia-RC_(+1	IRIS_11360	IRIS_313-11360	Japonica	aro	0.97	0.966	7	6	No - Premature stop imediately after HMA domain
					14	104_12190_surrrounding_Pia_(+1)	IRIS_12190	IRIS_313-12190	Indica	indx	1	0.97	5	5	Yes
					15	CM020704.1:6464019-6472715_(+1)	IRRI:IRGC 12485-1	IRIS_313-8813	Japonica	aro	1	0.97	6	7	Possible - 2 AA change compared to 12190

## Sheet: Pias-2
			Genotype	IRIS_or_other	Indica or Japonica	SubGroup	Coverage	Identity	Variant	Type
	1	IRIS_313-11163	IRIS_313-11163	IRIS_313-11163		aus	1	1	1	Pias-2 like	3 AA changes relative to Pias-2
	2	IRIS_313-10879	IRIS_313-10879	IRIS_313-10879		admix	1	0.999	2	Pias-2 like	1 AA change relative to Pias-2
	3	IRIS_313-8554	IRIS_313-8554	IRIS_313-8554		aus	1	0.999	2	Pias-2 like	1 AA change relative to Pias-2
	4	IRIS_313-12029	IRIS_313-12029	IRIS_313-12029	Japonica	subtrop	1	0.999	2	Pias-2 like	1 AA change relative to Pias-2
	5	Keiboba	Keiboba	Keiboba	Indica	?	0.999	0.998	3	Pias-2
	6	IRIS_313-10738	IRIS_313-10738	IRIS_313-10738		admix	0.951	0.969	4	LOC_Os11g11810.1-like
	7	IRIS_313-11127	IRIS_313-11127	IRIS_313-11127	Japonica	subtrop	0.951	0.969	4	LOC_Os11g11810.1-like
	8	IRIS_313-10841	IRIS_313-10841	IRIS_313-10841	Japonica	trop	0.951	0.969	4	LOC_Os11g11810.1-like
	9	Azucena	Azucena	CX151	Japonica	trop	0.951	0.969	4	LOC_Os11g11810.1-like
	10	Nipponbare	Nipponbare	CX140	Japonica		0.951	0.969	5	LOC_Os11g11810.1
	11	IRIS_313-7914	IRIS_313-7914	IRIS_313-7914	Japonica	trop	0.952	0.969	6	LOC_Os11g11810.1-like
	12	IRIS_313-11708	IRIS_313-11708	IRIS_313-11708	Indica	ind3	0.952	0.967	7	LOC_Os11g11810.1-like
